# Supplementary material
Source: publisher figshare collection journal article supplement (https://gsajournals.figshare.com/ndownloader/files/22772888)
Supplement: Supplementary file 1 [file 22772888]

## Sheet: Combined Anthophila
	A	G	L	P	S	T	Total
Apidae	68	0	1	1	6859	4418	11347
Megachilidae	4	0	0	0	3751	0	3755
Colletidae	2040	0	0	0	0	7	2047
Halictidae	8366	0	0	0	3	0	8369
Andrenidae	1830	1	0	0	0	6	1837
Melittidae	146	0	0	0	0	0	146
	A	G	L	P	S	T
Apidae	0.00599277	0	8.8129e-05	8.8129e-05	0.604477	0.389354
Megachilidae	0.00106525	0	0	0	0.998935	0
Colletidae	0.99658	0	0	0	0	0.00341964
Halictidae	0.999642	0	0	0	0.000358466	0
Andrenidae	0.996189	0.000544366	0	0	0	0.00326619
Melittidae	1	0	0	0	0	0

## Sheet: Table S7 Legend
Table S7: Analysis of bee COI barcodes obtained from BOLD. Entries for bee families Apidae, Megachilidae, Colletidae, Halictidae, Andrenidae, and Melittidae, as defined in (Sann et al. 2018), were obtained from BOLD (Ratnasingham and Hebert 2007), but no samples from the small bee family Stenotritidae were available. In addition, no Spheciformes samples were found in BOLD. After deletion of sampl…

## Sheet: Apidae BOLD Position 153
BOLD Sample	COI Position 153
ASINH937-12|Centris adanae|COI-5P	A
ASINH942-12|Centris analis|COI-5P	A
ASINH057-12|Eufriesea anisochlora|COI-5P	A
ASINH059-12|Eufriesea anisochlora|COI-5P	A
GBAH0413-06|Bombus bicoloratus|COI-5P|AF385819	A
ASINH463-12|Eulaema bombiformis|COI-5P	A
ANGEN080-15|Amegilla cingulata|COI-5P	A
ASINH948-12|Centris difformis|COI-5P	A
ASINH015-12|Bombus digressus|COI-5P	A
ASINH917-12|Trigonisca discolor|COI-5P	A
ASINH024-12|Bombus ephippiatus|COI-5P	A
GBAH7068-10|Bombus funerarius|COI-5P|FJ175342	A
GBAH7064-10|Bombus haemorrhoidalis|COI-5P|FJ175346	A
GBAH7067-10|Bombus haemorrhoidalis|COI-5P|FJ175343	A
GBAH7062-10|Bombus haemorrhoidalis|COI-5P|FJ175348	A
GBAH7063-10|Bombus haemorrhoidalis|COI-5P|FJ175347	A
GBAH7065-10|Bombus haemorrhoidalis|COI-5P|FJ175345	A
GBAH7066-10|Bombus haemorrhoidalis|COI-5P|FJ175344	A
BOFTH532-10|Bombus haemorrhoidalis|COI-5P|HM404328	A
GBMIN71956-17|Bombus haemorrhoidalis|COI-5P|KT334307	A
GBMIN71957-17|Bombus haemorrhoidalis|COI-5P|KY072122	A
GBAH7097-10|Bombus kulingensis|COI-5P|FJ175232	A
GBHAP511-14|Lestrimelitta maracaia|COI-5P|KC853378	A
ASINH034-12|Bombus mexicanus|COI-5P	A
FBAPC131-10|Nomada minuscula|COI-5P|KJ839005	A
FBAPC886-11|Nomada minuscula|COI-5P|KJ837934	A
FBAPC887-11|Nomada minuscula|COI-5P|KJ838955	A
FBAPC130-10|Nomada minuscula|COI-5P|KJ838423	A
FBAPC885-11|Nomada minuscula|COI-5P|KJ837154	A
FBAPC129-10|Nomada minuscula|COI-5P|KJ837468	A
FBAPD201-11|Nomada minuscula|COI-5P|KJ838759	A
FBAPC888-11|Nomada minuscula|COI-5P|KJ837375	A
GBACU057-12|Nomada minuscula|COI-5P|KJ837262	A
FBAPD745-11|Nomada minuscula|COI-5P|KJ838948	A
FBAPD743-11|Nomada minuscula|COI-5P|KJ837730	A
FBAPD742-11|Nomada minuscula|COI-5P|KJ837068	A
GBACU349-12|Nomada minuscula|COI-5P|KJ839087	A
FBAPB288-09|Nomada minuscula|COI-5P|KJ838758	A
FBAPB290-09|Nomada minuscula|COI-5P|KJ838062	A
GBMIN18145-13|Bombus pascuorum|COI-5P|KC135906	A
ASINH924-12|Trigonisca pipioli|COI-5P	A
GBAH0724-06|Bombus soroeensis|COI-5P|AY181160	A
GBAH0723-06|Bombus soroeensis|COI-5P|AY181159	A
GBAH0722-06|Bombus soroeensis|COI-5P|AY181158	A
GBAH0725-06|Bombus soroeensis|COI-5P|AY181161	A
GBAH0726-06|Bombus soroeensis|COI-5P|AY181162	A
GBAH0400-06|Bombus soroeensis|COI-5P|AF385806	A
GBACU968-12|Bombus soroeensis|COI-5P|KJ839110	A
FBHAP840-09|Bombus soroeensis|COI-5P|GU705938	A
GBACU970-12|Bombus soroeensis|COI-5P|KJ837773	A
GBACU2339-13|Bombus soroeensis|COI-5P|KJ836587	A
GBACU969-12|Bombus soroeensis|COI-5P|KJ836917	A
GBACU972-12|Bombus soroeensis|COI-5P|KJ836674	A
FBHAP841-09|Bombus soroeensis|COI-5P|GU705936	A
GBACU1191-12|Bombus soroeensis|COI-5P|KJ838930	A
FBAPC710-11|Bombus soroeensis|COI-5P|KJ837461	A
FBAPC711-11|Bombus soroeensis|COI-5P|KJ838293	A
GBACU1189-12|Bombus soroeensis|COI-5P|KJ839647	A
GBACU1190-12|Bombus soroeensis|COI-5P|KJ839741	A
GBMIN72751-17|Bombus soroeensis|COI-5P|KX957813	A
BEEEE315-16|Bombus soroeensis|COI-5P	A
GBMIN72750-17|Bombus soroeensis|COI-5P|KX957814	A
MSAPB1262-12|Braunsapis sp. A|COI-5P	A
MSAPB1265-12|Braunsapis sp. B|COI-5P	A
MSAPB1263-12|Braunsapis sp. B|COI-5P	A
MSAPB1264-12|Braunsapis sp. B|COI-5P	A
GBAH6195-09|Scaptotrigona sp. MP102|COI-5P|EU163099	A
GBHAP1368-15|Acanthopus velikensis|COI-5P|KJ003327	A
ABEE214-17|Ceratina cucurbitina|COI-5P	L
GBAH1940-06|Coelioxoides sp. DS-2005|COI-5P|DQ225327	P
FBAPC468-10|Ammobatoides abdominalis|COI-5P|KJ839626	S
FBAPC469-10|Ammobatoides abdominalis|COI-5P|KJ838056	S
SDBEE055-12|Ceratina acantha|COI-5P	S
SDBEE056-12|Ceratina acantha|COI-5P	S
SDBEE057-12|Ceratina acantha|COI-5P	S
BBHYA2775-12|Ceratina acantha|COI-5P	S
BBHYA3299-12|Ceratina acantha|COI-5P	S
BBHYA3084-12|Ceratina acantha|COI-5P	S
BBHYA2781-12|Ceratina acantha|COI-5P	S
BBHYA2251-12|Ceratina acantha|COI-5P	S
BEECC184-08|Ceratina acantha|COI-5P	S
BEECC183-08|Ceratina acantha|COI-5P	S
BEECC181-08|Ceratina acantha|COI-5P	S
BEECC182-08|Ceratina acantha|COI-5P	S
BEECA130-06|Ceratina acantha|COI-5P	S
BBHYA2132-12|Ceratina acantha|COI-5P	S
BBHYA2161-12|Ceratina acantha|COI-5P	S
BBHYA2195-12|Ceratina acantha|COI-5P	S
BBHYA2173-12|Ceratina acantha|COI-5P	S
BEECA048-06|Ceratina acantha|COI-5P	S
BEECA047-06|Ceratina acantha|COI-5P	S
LASNA442-08|Amegilla acraensis|COI-5P	S
ABEE095-17|Ceratina acuta|COI-5P	S
GBMIN71580-17|Amegilla adelaidae|COI-5P|KY485646	S
GBMIN71579-17|Amegilla adelaidae|COI-5P|KY485645	S
BEECA388-06|Svastra aegis|COI-5P	S
GBMIN142771-18|Eucera aeolopus|COI-5P|MG251069	S
HYQTB229-12|Amegilla aeruginosa|COI-5P	S
HYQTB238-12|Amegilla aeruginosa|COI-5P	S
HYQTB228-12|Amegilla aeruginosa|COI-5P	S
FBAPD573-11|Anthophora aestivalis|COI-5P|KJ836536	S
FBAPD409-11|Anthophora aestivalis|COI-5P|KJ839335	S
FBAPD575-11|Anthophora aestivalis|COI-5P|KJ837627	S
FBAPD410-11|Anthophora aestivalis|COI-5P|KJ837776	S
FBAPD100-11|Anthophora aestivalis|COI-5P|KJ837304	S
FBHAP393-09|Anthophora aestivalis|COI-5P|HM376217	S
BCHYM460-13|Anthophora aestivalis|COI-5P|KJ836526	S
FBAPD411-11|Anthophora aestivalis|COI-5P|KJ837000	S
FBAPD572-11|Anthophora aestivalis|COI-5P|KJ836410	S
FBAPD574-11|Anthophora aestivalis|COI-5P|KJ837812	S
GMGMI085-14|Anthophora aestivalis|COI-5P	S
FBAPB446-09|Anthophora aestivalis|COI-5P|KJ839522	S
GBLGC023-12|Anthophora aestivalis|COI-5P|KJ838377	S
GBLGC025-12|Anthophora aestivalis|COI-5P|KJ836632	S
FBHAP392-09|Anthophora aestivalis|COI-5P|KJ836723	S
BOFTW090-08|Xylocopa aestuans|COI-5P	S
GMMCK169-14|Ceratina aff. arizonensis|COI-5P	S
BOFWM272-08|Diadasia aff. diminuta|COI-5P	S
BEECB1055-07|Diadasia aff. australis|COI-5P	S
TTHYW051-08|Diadasia aff. australis|COI-5P|KR885861	S
TTHYW127-08|Diadasia aff. australis|COI-5P|KR885576	S
GBHAP151-13|Macrogalea aff. ellioti|COI-5P|KC425353	S
BEECD464-09|Bombus affinis|COI-5P|GU707738	S
BBBO147-10|Bombus affinis|COI-5P|JQ843369	S
BEECA543-06|Bombus affinis|COI-5P	S
GBAH3252-07|Diadasia afflictula|COI-5P|AF039091	S
GBAH3253-07|Diadasia afflictula|COI-5P|AF039090	S
BEECC599-09|Melissodes agilis|COI-5P	S
BEECC600-09|Melissodes agilis|COI-5P	S
BEECC592-09|Melissodes agilis|COI-5P	S
GBMIN142744-18|Melissodes agilis|COI-5P|MG251042	S
FBAPB425-09|Melecta albifrons|COI-5P|HQ948056	S
FBAPB424-09|Melecta albifrons|COI-5P|JN262462	S
FBAPB646-09|Melecta albifrons|COI-5P|KJ836888	S
FBHAP404-09|Melecta albifrons|COI-5P|KJ839782	S
GBLGC013-12|Melecta albifrons|COI-5P|KJ837575	S
GBLGC016-12|Melecta albifrons|COI-5P|KJ838827	S
GBLGC015-12|Melecta albifrons|COI-5P|KJ838547	S
GBLGC017-12|Melecta albifrons|COI-5P|KJ837298	S
GBLGC014-12|Melecta albifrons|COI-5P|KJ838167	S
GBMIN71831-17|Melecta albifrons|COI-5P|KX957908	S
GBMIN71832-17|Melecta albifrons|COI-5P|KX957909	S
ABEE153-17|Melecta albifrons|COI-5P	S
FBAPC950-11|Melecta albifrons|COI-5P|KJ838618	S
FBAPD096-11|Melecta albifrons|COI-5P|KJ839671	S
BEEEE342-16|Melecta albifrons|COI-5P	S
BEEEE154-15|Melecta albifrons|COI-5P	S
GBAH4533-09|Xylocopa albinotum|COI-5P|EU861303	S
GBAH4538-09|Xylocopa albinotum|COI-5P|EU861298	S
GBAH4536-09|Xylocopa albinotum|COI-5P|EU861300	S
GBAH4534-09|Xylocopa albinotum|COI-5P|EU861302	S
GBAH4543-09|Xylocopa albinotum|COI-5P|EU861293	S
GBAH4537-09|Xylocopa albinotum|COI-5P|EU861299	S
GBAH4544-09|Xylocopa albinotum|COI-5P|EU861292	S
GBAH4542-09|Xylocopa albinotum|COI-5P|EU861294	S
GBAH4535-09|Xylocopa albinotum|COI-5P|EU861301	S
GBAH4541-09|Xylocopa albinotum|COI-5P|EU861295	S
GBAH4540-09|Xylocopa albinotum|COI-5P|EU861296	S
GBAH4539-09|Xylocopa albinotum|COI-5P|EU861297	S
GBMIN142770-18|Eucera albofasciata|COI-5P|MG251068	S
FBAPC515-11|Nomada alboguttata|COI-5P|KJ839408	S
FBAPC126-10|Nomada alboguttata|COI-5P|KJ838519	S
FBAPC518-11|Nomada alboguttata|COI-5P|KJ838631	S
GBACU3798-13|Nomada alboguttata|COI-5P|KJ839395	S
BCHYM1508-13|Nomada alboguttata|COI-5P|KJ839268	S
FBAPB129-09|Nomada alboguttata|COI-5P|HM401036	S
FBAPC519-11|Nomada alboguttata|COI-5P|KJ838522	S
BEECC344-08|Nomada alboguttata|COI-5P	S
BEECC343-08|Nomada alboguttata|COI-5P	S
BEECA608-06|Nomada alboguttata|COI-5P	S
BEECA611-06|Nomada alboguttata|COI-5P	S
FBAPB130-09|Nomada alboguttata|COI-5P|HM401037	S
BEECA255-06|Nomada alboguttata|COI-5P	S
BOWGF146-08|Thyreus albomaculatus|COI-5P	S
BOWGF118-08|Thyreus albomaculatus|COI-5P	S
BEECC864-09|Melecta alexanderi|COI-5P	S
BEECC863-09|Melecta alexanderi|COI-5P	S
BEECC861-09|Melecta alexanderi|COI-5P	S
BEECC862-09|Melecta alexanderi|COI-5P	S
GBMIN142757-18|Eucera alfkeni|COI-5P|MG251055	S
GBMIN142762-18|Eucera algira|COI-5P|MG251060	S
OBP067-05|Euglossa allosticta|COI-5P	S
OBP066-05|Euglossa allosticta|COI-5P	S
OBP071-05|Euglossa allosticta|COI-5P	S
OBP070-05|Euglossa allosticta|COI-5P	S
ASINH144-12|Euglossa allosticta|COI-5P	S
ASINH145-12|Euglossa allosticta|COI-5P	S
ASINH146-12|Euglossa allosticta|COI-5P	S
OBP069-05|Euglossa allosticta|COI-5P	S
DRBEE082-07|Euglossa allosticta|COI-5P	S
ASINH141-12|Euglossa allosticta|COI-5P	S
ASINH147-12|Euglossa allosticta|COI-5P	S
ASINH143-12|Euglossa allosticta|COI-5P	S
ASINH150-12|Euglossa allosticta|COI-5P	S
DRBEE048-07|Euglossa allosticta|COI-5P	S
GBAH6303-09|Euglossa allosticta|COI-5P|EU421517	S
GBMIN71582-17|Amegilla alpha|COI-5P|KY485688	S
GBMIN71581-17|Amegilla alpha|COI-5P|KY485689	S
FBAPC619-11|Epeolus alpinus|COI-5P|KJ837447	S
FBAPC618-11|Epeolus alpinus|COI-5P|KJ838877	S
GBAH4560-09|Xylocopa amamensis|COI-5P|EU861276	S
GBAH4561-09|Xylocopa amamensis|COI-5P|EU861275	S
GBAH4559-09|Xylocopa amamensis|COI-5P|EU861277	S
GBAH4557-09|Xylocopa amamensis|COI-5P|EU861279	S
GBAH4558-09|Xylocopa amamensis|COI-5P|EU861278	S
GBAH4556-09|Xylocopa amamensis|COI-5P|EU861280	S
GBAH4555-09|Xylocopa amamensis|COI-5P|EU861281	S
GBAH4553-09|Xylocopa amamensis|COI-5P|EU861283	S
GBAH4554-09|Xylocopa amamensis|COI-5P|EU861282	S
GBAH4551-09|Xylocopa amamensis|COI-5P|EU861285	S
GBAH4552-09|Xylocopa amamensis|COI-5P|EU861284	S
DRBEE169-07|Euglossa amazonica|COI-5P	S
DRBEE126-07|Euglossa amazonica|COI-5P	S
GBAH6354-09|Euglossa amazonica|COI-5P|EU421466	S
AVS039-16|Melitoma ameghinoi|COI-5P	S
AVS051-16|Melitoma ameghinoi|COI-5P	S
AVS003-16|Melitoma ameghinoi|COI-5P	S
AVS015-16|Melitoma ameghinoi|COI-5P	S
AVS027-16|Melitoma ameghinoi|COI-5P	S
BEECA262-06|Epeolus americanus|COI-5P|MH089987	S
BEECA263-06|Epeolus americanus|COI-5P|MH089955	S
BEECB879-07|Epeolus americanus|COI-5P|MH089891	S
BEECB880-07|Epeolus americanus|COI-5P|MH089983	S
GBAH6275-09|Euglossa analis|COI-5P|EU421545	S
GBMIN71653-17|Apis andreniformis|COI-5P|KU212333	S
GBAH2282-07|Apis andreniformis|COI-5P|AB284154	S
GBAH2280-07|Apis andreniformis|COI-5P|AB284156	S
GBAH2279-07|Apis andreniformis|COI-5P|AB284157	S
GBAH2281-07|Apis andreniformis|COI-5P|AB284155	S
GBAH5171-09|Apis andreniformis|COI-5P|AB284152	S
GBAH5172-09|Apis andreniformis|COI-5P|AB284151	S
GBAH2278-07|Apis andreniformis|COI-5P|AB284158	S
GBAH2283-07|Apis andreniformis|COI-5P|AB284153	S
GBHAP875-14|Apis andreniformis|COI-5P|KF736157	S
GBMNA19001-19|Apis andreniformis|COI-5P|AP018490	S
GBAH6171-09|Apis andreniformis|COI-5P|EU163123	S
GBAH1782-06|Apis andreniformis|COI-5P|DQ016081	S
GBAH1783-06|Apis andreniformis|COI-5P|DQ016082	S
BEECB1071-07|Epeolus andriyi|COI-5P|MH089972	S
GBAH1895-06|Exoneura angophorae|COI-5P|DQ149660	S
ASINH1263-12|Epicharis angulosa|COI-5P	S
ASINH1267-12|Epicharis angulosa|COI-5P	S
ASINH063-12|Eufriesea anisochlora|COI-5P	S
OBP010-05|Eufriesea anisochlora|COI-5P	S
OBP007-05|Eufriesea anisochlora|COI-5P	S
OBP006-05|Eufriesea anisochlora|COI-5P	S
OBP009-05|Eufriesea anisochlora|COI-5P	S
ASINH061-12|Eufriesea anisochlora|COI-5P	S
ASINH060-12|Eufriesea anisochlora|COI-5P	S
OBP008-05|Eufriesea anisochlora|COI-5P	S
DRBEE058-07|Eufriesea anisochlora|COI-5P	S
GBAH6237-09|Eufriesea anisochlora|COI-5P|EU421583	S
DRBEE131-07|Euglossa annectans|COI-5P	S
GBAH6332-09|Euglossa annectans|COI-5P|EU421488	S
GBAH1913-06|Macrogalea antanosy|COI-5P|DQ149680	S
BBHYA1831-12|Ancyloscelis apiformis|COI-5P	S
GBMIN17964-13|Xylocopa appendiculata circumvolans|COI-5P|KC136021	S
GBAH12654-15|Xylocopa appendiculata|COI-5P|KM362700	S
GBAH12645-15|Xylocopa appendiculata|COI-5P|KM362691	S
GBAH12650-15|Xylocopa appendiculata|COI-5P|KM362696	S
GBAH12653-15|Xylocopa appendiculata|COI-5P|KM362699	S
GBAH12652-15|Xylocopa appendiculata|COI-5P|KM362698	S
GBAH12647-15|Xylocopa appendiculata|COI-5P|KM362693	S
GBAH12648-15|Xylocopa appendiculata|COI-5P|KM362694	S
GBAH12649-15|Xylocopa appendiculata|COI-5P|KM362695	S
GBAH12651-15|Xylocopa appendiculata|COI-5P|KM362697	S
GBAH12646-15|Xylocopa appendiculata|COI-5P|KM362692	S
GBAH4565-09|Xylocopa appendiculata|COI-5P|EU861271	S
GBAH4566-09|Xylocopa appendiculata|COI-5P|EU861270	S
GBAH4568-09|Xylocopa appendiculata|COI-5P|EU861268	S
GBAH4569-09|Xylocopa appendiculata|COI-5P|EU861267	S
GBAH4567-09|Xylocopa appendiculata|COI-5P|EU861269	S
GBAH4562-09|Xylocopa appendiculata|COI-5P|EU861274	S
GBAH4564-09|Xylocopa appendiculata|COI-5P|EU861272	S
GBAH4563-09|Xylocopa appendiculata|COI-5P|EU861273	S
BOFTW062-08|Diadasina ARG01|COI-5P	S
BOFTW004-08|Melitoma ARG01|COI-5P	S
LASNA481-08|Melissoptila ARG03|COI-5P	S
LASNA576-08|Melissoptila ARG03|COI-5P	S
BOFTW008-08|Exomalopsis ARG1|COI-5P	S
BOFTW103-08|Tetrapedia ARG1|COI-5P	S
LASNA480-08|Tetrapedia ARG1|COI-5P	S
LASNA575-08|Tetrapedia ARG1|COI-5P	S
BOFTW068-08|Exomalopsis ARG2|COI-5P	S
BOFTW006-08|Melissoptila ARG2|COI-5P	S
BOFTW007-08|Melissoptila ARG3|COI-5P	S
BOFTW003-08|Nomada argapa|COI-5P	S
FBAPD716-11|Nomada argentata|COI-5P|KJ838360	S
FBAPD715-11|Nomada argentata|COI-5P|KJ837071	S
FBAPB131-09|Nomada argentata|COI-5P|HQ563101	S
BUSA011-05|Holcopasites arizonicus|COI-5P	S
FBAPB134-09|Nomada armata|COI-5P|HM401038	S
FBAPC162-10|Nomada armata|COI-5P|KJ837145	S
GBCOU205-13|Nomada armata|COI-5P|KJ836882	S
FBHAP639-09|Nomada armata|COI-5P|KJ839482	S
BEECC336-08|Nomada armatella|COI-5P	S
BEECC334-08|Nomada armatella|COI-5P	S
BEECC335-08|Nomada armatella|COI-5P	S
HDBNS119-03|Nomada armatella|COI-5P|FJ582335	S
HDBNS103-03|Nomada articulata|COI-5P|FJ582339	S
HDBNS111-03|Nomada articulata|COI-5P|FJ582340	S
HDBNS100-03|Nomada articulata|COI-5P|FJ582338	S
UPOLB587-09|Nomada articulata|COI-5P	S
UPOLB604-09|Nomada articulata|COI-5P	S
BEECA579-06|Nomada articulata|COI-5P	S
BUSA119-05|Nomada articulata|COI-5P	S
HDBNS102-03|Nomada articulata|COI-5P|FJ582336	S
HDBNS101-03|Nomada articulata|COI-5P|FJ582337	S
BEECA580-06|Nomada articulata|COI-5P	S
BEECA581-06|Nomada articulata|COI-5P	S
BEECA578-06|Nomada articulata|COI-5P	S
ASINH155-12|Euglossa asarophora|COI-5P	S
ASINH154-12|Euglossa asarophora|COI-5P	S
ASINH152-12|Euglossa asarophora|COI-5P	S
ASINH151-12|Euglossa asarophora|COI-5P	S
ASINH153-12|Euglossa asarophora|COI-5P	S
DRBEE051-07|Euglossa asarophora|COI-5P	S
GBAH6325-09|Euglossa asarophora|COI-5P|EU421495	S
GBAH6324-09|Euglossa asarophora|COI-5P|EU421496	S
GBAH6204-09|Euglossa asarophora|COI-5P|EU163090	S
GBAH1606-06|Euglossa asarophora|COI-5P|AY920303	S
GBMIN71586-17|Amegilla asserta|COI-5P|KY485642	S
GBMIN71587-17|Amegilla asserta|COI-5P|KY485644	S
GBMIN71584-17|Amegilla asserta|COI-5P|KY485694	S
GBMIN71585-17|Amegilla asserta|COI-5P|KY485698	S
GBMIN71588-17|Amegilla asserta|COI-5P|KY485640	S
GBMIN71583-17|Amegilla asserta|COI-5P|KY485686	S
GBMIN12291-13|Eufriesea atlantica|COI-5P|KC313076	S
GBMIN73160-17|Eulaema atleticana|COI-5P|KU135066	S
GBMIN72944-17|Eulaema atleticana|COI-5P|KU135533	S
GBMIN72922-17|Eulaema atleticana|COI-5P|KU135539	S
GBMIN73150-17|Eulaema atleticana|COI-5P|KU135591	S
GBMIN73180-17|Eulaema atleticana|COI-5P|KU135035	S
GBMIN73230-17|Eulaema atleticana|COI-5P|KU135228	S
GBMIN72935-17|Eulaema atleticana|COI-5P|KU135538	S
GBMIN72964-17|Eulaema atleticana|COI-5P|KU135462	S
GBMIN72948-17|Eulaema atleticana|COI-5P|KU135461	S
GBMIN73068-17|Eulaema atleticana|COI-5P|KU135584	S
GBMIN72979-17|Eulaema atleticana|COI-5P|KU135518	S
GBMIN73020-17|Eulaema atleticana|COI-5P|KU135307	S
GBMIN73036-17|Eulaema atleticana|COI-5P|KU135417	S
GBMIN73262-17|Eulaema atleticana|COI-5P|KU135085	S
GBMIN72927-17|Eulaema atleticana|COI-5P|KU135556	S
GBMIN72988-17|Eulaema atleticana|COI-5P|KU135527	S
GBMIN73202-17|Eulaema atleticana|COI-5P|KU134939	S
GBMIN73070-17|Eulaema atleticana|COI-5P|KU135581	S
GBMIN72941-17|Eulaema atleticana|COI-5P|KU135563	S
GBMIN73048-17|Eulaema atleticana|COI-5P|KU135382	S
GBMIN73065-17|Eulaema atleticana|COI-5P|KU134952	S
GBMIN73086-17|Eulaema atleticana|COI-5P|KU134958	S
GBMIN73255-17|Eulaema atleticana|COI-5P|KU135154	S
GBMIN73145-17|Eulaema atleticana|COI-5P|KU135541	S
GBMIN73273-17|Eulaema atleticana|COI-5P|KU135084	S
GBMIN73089-17|Eulaema atleticana|COI-5P|KU135454	S
GBMIN73276-17|Eulaema atleticana|COI-5P|KU135088	S
GBMIN72981-17|Eulaema atleticana|COI-5P|KU135510	S
GBMIN73034-17|Eulaema atleticana|COI-5P|KU135414	S
GBMIN73250-17|Eulaema atleticana|COI-5P|KU135140	S
GBMIN72985-17|Eulaema atleticana|COI-5P|KU135513	S
GBMIN73186-17|Eulaema atleticana|COI-5P|KU135017	S
GBMIN73231-17|Eulaema atleticana|COI-5P|KU135238	S
GBMIN73234-17|Eulaema atleticana|COI-5P|KU135242	S
GBMIN72989-17|Eulaema atleticana|COI-5P|KU135490	S
GBMIN73210-17|Eulaema atleticana|COI-5P|KU135257	S
GBMIN73079-17|Eulaema atleticana|COI-5P|KU135011	S
GBMIN73093-17|Eulaema atleticana|COI-5P|KU135487	S
GBMIN73282-17|Eulaema atleticana|COI-5P|KU135099	S
GBMIN73136-17|Eulaema atleticana|COI-5P|KU135189	S
GBMIN73249-17|Eulaema atleticana|COI-5P|KU135111	S
GBMIN73099-17|Eulaema atleticana|COI-5P|KU135432	S
GBMIN73023-17|Eulaema atleticana|COI-5P|KU135415	S
GBMIN73247-17|Eulaema atleticana|COI-5P|KU135116	S
GBMIN73220-17|Eulaema atleticana|COI-5P|KU135225	S
GBMIN72968-17|Eulaema atleticana|COI-5P|KU135441	S
GBMIN72987-17|Eulaema atleticana|COI-5P|KU135005	S
GBMIN73033-17|Eulaema atleticana|COI-5P|KU135438	S
GBMIN73112-17|Eulaema atleticana|COI-5P|KU135280	S
GBMIN73203-17|Eulaema atleticana|COI-5P|KU135015	S
GBMIN72961-17|Eulaema atleticana|COI-5P|KU135468	S
GBMIN73010-17|Eulaema atleticana|COI-5P|KU135244	S
GBMIN73182-17|Eulaema atleticana|COI-5P|KU135021	S
GBMIN73190-17|Eulaema atleticana|COI-5P|KU135289	S
GBMIN73095-17|Eulaema atleticana|COI-5P|KU135365	S
GBMIN72994-17|Eulaema atleticana|COI-5P|KU135314	S
GBMIN73157-17|Eulaema atleticana|COI-5P|KU135059	S
GBMIN72949-17|Eulaema atleticana|COI-5P|KU135458	S
GBMIN73026-17|Eulaema atleticana|COI-5P|KU135418	S
GBMIN73032-17|Eulaema atleticana|COI-5P|KU135440	S
GBMIN73060-17|Eulaema atleticana|COI-5P|KU135038	S
GBMIN73146-17|Eulaema atleticana|COI-5P|KU135571	S
GBMIN73066-17|Eulaema atleticana|COI-5P|KU134948	S
GBMIN73169-17|Eulaema atleticana|COI-5P|KU135049	S
GBMIN72943-17|Eulaema atleticana|COI-5P|KU135557	S
GBMIN73225-17|Eulaema atleticana|COI-5P|KU135240	S
GBMIN73226-17|Eulaema atleticana|COI-5P|KU135258	S
GBMIN73016-17|Eulaema atleticana|COI-5P|KU135309	S
GBMIN73218-17|Eulaema atleticana|COI-5P|KU135252	S
GBMIN73189-17|Eulaema atleticana|COI-5P|KU135366	S
GBMIN73109-17|Eulaema atleticana|COI-5P|KU135295	S
GBMIN73128-17|Eulaema atleticana|COI-5P|KU135160	S
GBMIN73158-17|Eulaema atleticana|COI-5P|KU135574	S
GBMIN73015-17|Eulaema atleticana|COI-5P|KU135342	S
GBMIN72936-17|Eulaema atleticana|COI-5P|KU135545	S
GBMIN73042-17|Eulaema atleticana|COI-5P|KU135373	S
GBMIN73199-17|Eulaema atleticana|COI-5P|KU135016	S
GBMIN73204-17|Eulaema atleticana|COI-5P|KU135300	S
GBMIN73256-17|Eulaema atleticana|COI-5P|KU135139	S
GBMIN73043-17|Eulaema atleticana|COI-5P|KU135380	S
GBMIN73148-17|Eulaema atleticana|COI-5P|KU135060	S
GBMIN73134-17|Eulaema atleticana|COI-5P|KU135202	S
GBMIN73163-17|Eulaema atleticana|COI-5P|KU135058	S
GBMIN73243-17|Eulaema atleticana|COI-5P|KU135148	S
GBMIN73237-17|Eulaema atleticana|COI-5P|KU135143	S
GBMIN73102-17|Eulaema atleticana|COI-5P|KU134963	S
GBMIN73176-17|Eulaema atleticana|COI-5P|KU134992	S
GBMIN73206-17|Eulaema atleticana|COI-5P|KU135311	S
GBMIN73058-17|Eulaema atleticana|COI-5P|KU135007	S
GBMIN73277-17|Eulaema atleticana|COI-5P|KU135071	S
GBMIN73242-17|Eulaema atleticana|COI-5P|KU135120	S
GBMIN73025-17|Eulaema atleticana|COI-5P|KU135406	S
GBMIN73205-17|Eulaema atleticana|COI-5P|KU135018	S
GBMIN73115-17|Eulaema atleticana|COI-5P|KU135273	S
GBMIN73228-17|Eulaema atleticana|COI-5P|KU135215	S
GBMIN73002-17|Eulaema atleticana|COI-5P|KU135341	S
GBMIN73165-17|Eulaema atleticana|COI-5P|KU135587	S
GBMIN73052-17|Eulaema atleticana|COI-5P|KU135368	S
GBMIN72977-17|Eulaema atleticana|COI-5P|KU135507	S
GBMIN73216-17|Eulaema atleticana|COI-5P|KU135246	S
GBMIN73063-17|Eulaema atleticana|COI-5P|KU134956	S
GBMIN73153-17|Eulaema atleticana|COI-5P|KU135589	S
GBMIN72928-17|Eulaema atleticana|COI-5P|KU135559	S
GBMIN72997-17|Eulaema atleticana|COI-5P|KU135267	S
GBMIN73278-17|Eulaema atleticana|COI-5P|KU135069	S
GBMIN73215-17|Eulaema atleticana|COI-5P|KU135229	S
GBMIN72933-17|Eulaema atleticana|COI-5P|KU135536	S
GBMIN73077-17|Eulaema atleticana|COI-5P|KU134969	S
GBMIN73098-17|Eulaema atleticana|COI-5P|KU135255	S
GBMIN73071-17|Eulaema atleticana|COI-5P|KU135010	S
GBMIN72934-17|Eulaema atleticana|COI-5P|KU135543	S
GBMIN72955-17|Eulaema atleticana|COI-5P|KU135448	S
GBMIN72962-17|Eulaema atleticana|COI-5P|KU135485	S
GBMIN72996-17|Eulaema atleticana|COI-5P|KU135310	S
GBMIN73174-17|Eulaema atleticana|COI-5P|KU135039	S
GBMIN72984-17|Eulaema atleticana|COI-5P|KU135506	S
GBMIN72970-17|Eulaema atleticana|COI-5P|KU135134	S
GBMIN73166-17|Eulaema atleticana|COI-5P|KU135046	S
GBMIN73049-17|Eulaema atleticana|COI-5P|KU135374	S
GBMIN72998-17|Eulaema atleticana|COI-5P|KU135317	S
GBMIN73238-17|Eulaema atleticana|COI-5P|KU135119	S
GBMIN73191-17|Eulaema atleticana|COI-5P|KU135410	S
GBMIN73097-17|Eulaema atleticana|COI-5P|KU134998	S
GBMIN72969-17|Eulaema atleticana|COI-5P|KU135521	S
GBMIN73055-17|Eulaema atleticana|COI-5P|KU135381	S
GBMIN73224-17|Eulaema atleticana|COI-5P|KU135235	S
GBMIN73235-17|Eulaema atleticana|COI-5P|KU135152	S
GBMIN73239-17|Eulaema atleticana|COI-5P|KU135127	S
GBMIN73263-17|Eulaema atleticana|COI-5P|KU135107	S
GBMIN73130-17|Eulaema atleticana|COI-5P|KU135170	S
GBMIN73179-17|Eulaema atleticana|COI-5P|KU134943	S
GBMIN73004-17|Eulaema atleticana|COI-5P|KU135306	S
GBMIN73081-17|Eulaema atleticana|COI-5P|KU135009	S
GBMIN73194-17|Eulaema atleticana|COI-5P|KU135006	S
GBMIN73141-17|Eulaema atleticana|COI-5P|KU135184	S
GBMIN73118-17|Eulaema atleticana|COI-5P|KU135331	S
GBMIN72946-17|Eulaema atleticana|COI-5P|KU135471	S
GBMIN73103-17|Eulaema atleticana|COI-5P|KU135283	S
GBMIN73127-17|Eulaema atleticana|COI-5P|KU135169	S
GBMIN72930-17|Eulaema atleticana|COI-5P|KU135540	S
GBMIN73219-17|Eulaema atleticana|COI-5P|KU135224	S
GBMIN72974-17|Eulaema atleticana|COI-5P|KU135489	S
GBMIN73177-17|Eulaema atleticana|COI-5P|KU135030	S
GBMIN73268-17|Eulaema atleticana|COI-5P|KU135076	S
GBMIN73139-17|Eulaema atleticana|COI-5P|KU135203	S
GBMIN73236-17|Eulaema atleticana|COI-5P|KU135110	S
GBMIN73275-17|Eulaema atleticana|COI-5P|KU135070	S
GBMIN73168-17|Eulaema atleticana|COI-5P|KU135222	S
GBMIN73154-17|Eulaema atleticana|COI-5P|KU135041	S
GBMIN73227-17|Eulaema atleticana|COI-5P|KU135214	S
GBMIN72983-17|Eulaema atleticana|COI-5P|KU135001	S
GBMIN73257-17|Eulaema atleticana|COI-5P|KU135138	S
GBMIN72982-17|Eulaema atleticana|COI-5P|KU135498	S
GBMIN73046-17|Eulaema atleticana|COI-5P|KU135393	S
GBMIN73003-17|Eulaema atleticana|COI-5P|KU135313	S
GBMIN73074-17|Eulaema atleticana|COI-5P|KU135583	S
GBMIN72923-17|Eulaema atleticana|COI-5P|KU135555	S
GBMIN73113-17|Eulaema atleticana|COI-5P|KU135330	S
GBMIN72972-17|Eulaema atleticana|COI-5P|KU135501	S
GBMIN73244-17|Eulaema atleticana|COI-5P|KU135133	S
GBMIN72938-17|Eulaema atleticana|COI-5P|KU135565	S
GBMIN73062-17|Eulaema atleticana|COI-5P|KU134968	S
GBMIN73017-17|Eulaema atleticana|COI-5P|KU135318	S
GBMIN73251-17|Eulaema atleticana|COI-5P|KU135144	S
GBMIN72945-17|Eulaema atleticana|COI-5P|KU135477	S
GBMIN73195-17|Eulaema atleticana|COI-5P|KU135034	S
GBMIN72960-17|Eulaema atleticana|COI-5P|KU135446	S
GBMIN72963-17|Eulaema atleticana|COI-5P|KU135459	S
GBMIN73050-17|Eulaema atleticana|COI-5P|KU135387	S
GBMIN73137-17|Eulaema atleticana|COI-5P|KU135181	S
GBMIN72965-17|Eulaema atleticana|COI-5P|KU135453	S
GBMIN73133-17|Eulaema atleticana|COI-5P|KU135195	S
GBMIN73214-17|Eulaema atleticana|COI-5P|KU135237	S
GBMIN72940-17|Eulaema atleticana|COI-5P|KU135560	S
GBMIN73018-17|Eulaema atleticana|COI-5P|KU135346	S
GBMIN73044-17|Eulaema atleticana|COI-5P|KU135379	S
GBMIN73054-17|Eulaema atleticana|COI-5P|KU135363	S
GBMIN73073-17|Eulaema atleticana|COI-5P|KU135579	S
GBMIN73211-17|Eulaema atleticana|COI-5P|KU135232	S
GBMIN73173-17|Eulaema atleticana|COI-5P|KU135047	S
GBMIN73047-17|Eulaema atleticana|COI-5P|KU135359	S
GBMIN73181-17|Eulaema atleticana|COI-5P|KU135582	S
GBMIN72975-17|Eulaema atleticana|COI-5P|KU135516	S
GBMIN73117-17|Eulaema atleticana|COI-5P|KU135266	S
GBMIN73162-17|Eulaema atleticana|COI-5P|KU135585	S
GBMIN73232-17|Eulaema atleticana|COI-5P|KU135210	S
GBMIN73135-17|Eulaema atleticana|COI-5P|KU135173	S
GBMIN73161-17|Eulaema atleticana|COI-5P|KU135055	S
GBMIN73122-17|Eulaema atleticana|COI-5P|KU135297	S
GBMIN73258-17|Eulaema atleticana|COI-5P|KU135131	S
GBMIN72976-17|Eulaema atleticana|COI-5P|KU135509	S
GBMIN73012-17|Eulaema atleticana|COI-5P|KU135353	S
GBMIN72990-17|Eulaema atleticana|COI-5P|KU135522	S
GBMIN73245-17|Eulaema atleticana|COI-5P|KU135136	S
GBMIN73119-17|Eulaema atleticana|COI-5P|KU135260	S
GBMIN73197-17|Eulaema atleticana|COI-5P|KU135322	S
GBMIN73013-17|Eulaema atleticana|COI-5P|KU135303	S
GBMIN73001-17|Eulaema atleticana|COI-5P|KU135308	S
GBMIN73188-17|Eulaema atleticana|COI-5P|KU135377	S
GBMIN73207-17|Eulaema atleticana|COI-5P|KU135278	S
GBMIN72980-17|Eulaema atleticana|COI-5P|KU135512	S
GBMIN73223-17|Eulaema atleticana|COI-5P|KU135211	S
GBMIN73138-17|Eulaema atleticana|COI-5P|KU135205	S
GBMIN73132-17|Eulaema atleticana|COI-5P|KU135185	S
GBMIN73087-17|Eulaema atleticana|COI-5P|KU134960	S
GBMIN72999-17|Eulaema atleticana|COI-5P|KU135305	S
GBMIN73123-17|Eulaema atleticana|COI-5P|KU135335	S
GBMIN73040-17|Eulaema atleticana|COI-5P|KU135361	S
GBMIN72993-17|Eulaema atleticana|COI-5P|KU135256	S
GBMIN73092-17|Eulaema atleticana|COI-5P|KU135000	S
GBMIN72953-17|Eulaema atleticana|COI-5P|KU135474	S
GBMIN73252-17|Eulaema atleticana|COI-5P|KU135114	S
GBMIN73104-17|Eulaema atleticana|COI-5P|KU135293	S
GBMIN73029-17|Eulaema atleticana|COI-5P|KU135400	S
GBMIN73196-17|Eulaema atleticana|COI-5P|KU135032	S
GBMIN73076-17|Eulaema atleticana|COI-5P|KU134955	S
GBMIN72925-17|Eulaema atleticana|COI-5P|KU135570	S
GBMIN73221-17|Eulaema atleticana|COI-5P|KU135208	S
GBMIN73270-17|Eulaema atleticana|COI-5P|KU135106	S
GBMIN73240-17|Eulaema atleticana|COI-5P|KU135118	S
GBMIN73129-17|Eulaema atleticana|COI-5P|KU135197	S
GBMIN73172-17|Eulaema atleticana|COI-5P|KU135595	S
GBMIN73061-17|Eulaema atleticana|COI-5P|KU134976	S
GBMIN73019-17|Eulaema atleticana|COI-5P|KU135339	S
GBMIN72966-17|Eulaema atleticana|COI-5P|KU135467	S
GBMIN73006-17|Eulaema atleticana|COI-5P|KU135315	S
GBMIN73021-17|Eulaema atleticana|COI-5P|KU135397	S
GBMIN73110-17|Eulaema atleticana|COI-5P|KU135333	S
GBMIN72995-17|Eulaema atleticana|COI-5P|KU135340	S
GBMIN73053-17|Eulaema atleticana|COI-5P|KU135370	S
GBMIN72950-17|Eulaema atleticana|COI-5P|KU135157	S
GBMIN73105-17|Eulaema atleticana|COI-5P|KU135275	S
GBMIN73222-17|Eulaema atleticana|COI-5P|KU135209	S
GBMIN72947-17|Eulaema atleticana|COI-5P|KU135451	S
GBMIN73272-17|Eulaema atleticana|COI-5P|KU135072	S
GBMIN73045-17|Eulaema atleticana|COI-5P|KU135389	S
GBMIN73111-17|Eulaema atleticana|COI-5P|KU135329	S
GBMIN73005-17|Eulaema atleticana|COI-5P|KU135344	S
GBMIN73274-17|Eulaema atleticana|COI-5P|KU135098	S
GBMIN73031-17|Eulaema atleticana|COI-5P|KU135423	S
GBMIN73241-17|Eulaema atleticana|COI-5P|KU135156	S
GBMIN73209-17|Eulaema atleticana|COI-5P|KU135354	S
GBMIN73175-17|Eulaema atleticana|COI-5P|KU135057	S
GBMIN73184-17|Eulaema atleticana|COI-5P|KU135332	S
GBMIN73212-17|Eulaema atleticana|COI-5P|KU135254	S
GBMIN73201-17|Eulaema atleticana|COI-5P|KU135029	S
GBMIN73064-17|Eulaema atleticana|COI-5P|KU135014	S
GBMIN72937-17|Eulaema atleticana|COI-5P|KU135531	S
GBMIN72932-17|Eulaema atleticana|COI-5P|KU135537	S
GBMIN73101-17|Eulaema atleticana|COI-5P|KU135464	S
GBMIN73126-17|Eulaema atleticana|COI-5P|KU135271	S
GBMIN73269-17|Eulaema atleticana|COI-5P|KU135087	S
GBMIN73156-17|Eulaema atleticana|COI-5P|KU135079	S
GBMIN73125-17|Eulaema atleticana|COI-5P|KU135287	S
GBMIN73107-17|Eulaema atleticana|COI-5P|KU135279	S
GBMIN73039-17|Eulaema atleticana|COI-5P|KU135371	S
GBMIN73080-17|Eulaema atleticana|COI-5P|KU134954	S
GBMIN73085-17|Eulaema atleticana|COI-5P|KU134997	S
GBMIN73011-17|Eulaema atleticana|COI-5P|KU135348	S
GBMIN73024-17|Eulaema atleticana|COI-5P|KU135407	S
GBMIN73009-17|Eulaema atleticana|COI-5P|KU135320	S
GBMIN72942-17|Eulaema atleticana|COI-5P|KU135547	S
GBMIN73096-17|Eulaema atleticana|COI-5P|KU134996	S
GBMIN73022-17|Eulaema atleticana|COI-5P|KU135434	S
GBMIN73051-17|Eulaema atleticana|COI-5P|KU135376	S
GBMIN72957-17|Eulaema atleticana|COI-5P|KU135456	S
GBMIN73121-17|Eulaema atleticana|COI-5P|KU135265	S
GBMIN73281-17|Eulaema atleticana|COI-5P|KU135078	S
GBMIN72978-17|Eulaema atleticana|COI-5P|KU135499	S
GBMIN73037-17|Eulaema atleticana|COI-5P|KU135404	S
GBMIN73170-17|Eulaema atleticana|COI-5P|KU135596	S
GBMIN73144-17|Eulaema atleticana|COI-5P|KU135159	S
GBMIN73084-17|Eulaema atleticana|COI-5P|KU134990	S
GBMIN73030-17|Eulaema atleticana|COI-5P|KU135419	S
GBMIN73253-17|Eulaema atleticana|COI-5P|KU135126	S
GBMIN73059-17|Eulaema atleticana|COI-5P|KU135577	S
GBMIN73152-17|Eulaema atleticana|COI-5P|KU135044	S
GBMIN73178-17|Eulaema atleticana|COI-5P|KU135600	S
GBMIN72931-17|Eulaema atleticana|COI-5P|KU135534	S
GBMIN72954-17|Eulaema atleticana|COI-5P|KU135447	S
GBMIN73094-17|Eulaema atleticana|COI-5P|KU134988	S
GBMIN72967-17|Eulaema atleticana|COI-5P|KU135484	S
GBMIN72924-17|Eulaema atleticana|COI-5P|KU135549	S
GBMIN73108-17|Eulaema atleticana|COI-5P|KU135288	S
GBMIN73279-17|Eulaema atleticana|COI-5P|KU135082	S
GBMIN73091-17|Eulaema atleticana|COI-5P|KU134962	S
GBMIN73266-17|Eulaema atleticana|COI-5P|KU135077	S
GBMIN73159-17|Eulaema atleticana|COI-5P|KU135063	S
GBMIN73200-17|Eulaema atleticana|COI-5P|KU135020	S
GBMIN73140-17|Eulaema atleticana|COI-5P|KU135198	S
GBMIN73008-17|Eulaema atleticana|COI-5P|KU135316	S
GBMIN73075-17|Eulaema atleticana|COI-5P|KU135013	S
GBMIN73056-17|Eulaema atleticana|COI-5P|KU134979	S
GBMIN73229-17|Eulaema atleticana|COI-5P|KU135253	S
GBMIN73106-17|Eulaema atleticana|COI-5P|KU135291	S
GBMIN73151-17|Eulaema atleticana|COI-5P|KU135597	S
GBMIN73083-17|Eulaema atleticana|COI-5P|KU134967	S
GBMIN73271-17|Eulaema atleticana|COI-5P|KU135108	S
GBMIN73185-17|Eulaema atleticana|COI-5P|KU135602	S
GBMIN73038-17|Eulaema atleticana|COI-5P|KU135426	S
GBMIN73233-17|Eulaema atleticana|COI-5P|KU135221	S
GBMIN73028-17|Eulaema atleticana|COI-5P|KU135439	S
GBMIN73131-17|Eulaema atleticana|COI-5P|KU135207	S
GBMIN72986-17|Eulaema atleticana|COI-5P|KU135496	S
GBMIN73088-17|Eulaema atleticana|COI-5P|KU134966	S
GBMIN73155-17|Eulaema atleticana|COI-5P|KU135052	S
GBMIN72992-17|Eulaema atleticana|COI-5P|KU135304	S
GBMIN73120-17|Eulaema atleticana|COI-5P|KU135259	S
GBMIN73142-17|Eulaema atleticana|COI-5P|KU135182	S
GBMIN73208-17|Eulaema atleticana|COI-5P|KU135603	S
GBMIN73217-17|Eulaema atleticana|COI-5P|KU135250	S
GBMIN73198-17|Eulaema atleticana|COI-5P|KU134950	S
GBMIN73164-17|Eulaema atleticana|COI-5P|KU135123	S
GBMIN72926-17|Eulaema atleticana|COI-5P|KU135564	S
GBMIN73280-17|Eulaema atleticana|COI-5P|KU135080	S
GBMIN72971-17|Eulaema atleticana|COI-5P|KU135526	S
GBMIN73261-17|Eulaema atleticana|COI-5P|KU135083	S
GBMIN73007-17|Eulaema atleticana|COI-5P|KU135302	S
GBMIN73192-17|Eulaema atleticana|COI-5P|KU134959	S
GBMIN73057-17|Eulaema atleticana|COI-5P|KU134938	S
GBMIN72956-17|Eulaema atleticana|COI-5P|KU135452	S
GBMIN73267-17|Eulaema atleticana|COI-5P|KU135094	S
GBMIN73254-17|Eulaema atleticana|COI-5P|KU135128	S
GBMIN73124-17|Eulaema atleticana|COI-5P|KU135301	S
GBMIN72952-17|Eulaema atleticana|COI-5P|KU135472	S
GBMIN73187-17|Eulaema atleticana|COI-5P|KU134945	S
GBMIN73246-17|Eulaema atleticana|COI-5P|KU135158	S
GBMIN73193-17|Eulaema atleticana|COI-5P|KU135036	S
GBMIN73078-17|Eulaema atleticana|COI-5P|KU135145	S
GBMIN73090-17|Eulaema atleticana|COI-5P|KU134961	S
GBMIN73035-17|Eulaema atleticana|COI-5P|KU135394	S
GBMIN73265-17|Eulaema atleticana|COI-5P|KU135091	S
GBMIN73027-17|Eulaema atleticana|COI-5P|KU135430	S
GBMIN73213-17|Eulaema atleticana|COI-5P|KU135234	S
GBMIN73248-17|Eulaema atleticana|COI-5P|KU135151	S
GBMIN72951-17|Eulaema atleticana|COI-5P|KU135444	S
GBMIN73183-17|Eulaema atleticana|COI-5P|KU135399	S
GBMIN73260-17|Eulaema atleticana|COI-5P|KU135102	S
GBMIN73264-17|Eulaema atleticana|COI-5P|KU135086	S
GBMIN73259-17|Eulaema atleticana|COI-5P|KU135135	S
GBMIN73067-17|Eulaema atleticana|COI-5P|KU134946	S
GBMIN73000-17|Eulaema atleticana|COI-5P|KU135338	S
GBMIN72973-17|Eulaema atleticana|COI-5P|KU135495	S
GBMIN72958-17|Eulaema atleticana|COI-5P|KU135445	S
GBMIN73100-17|Eulaema atleticana|COI-5P|KU134993	S
GBMIN73143-17|Eulaema atleticana|COI-5P|KU135187	S
GBMIN73041-17|Eulaema atleticana|COI-5P|KU135391	S
GBMIN72991-17|Eulaema atleticana|COI-5P|KU135352	S
GBMIN73014-17|Eulaema atleticana|COI-5P|KU135351	S
GBMIN73069-17|Eulaema atleticana|COI-5P|KU134951	S
GBMIN73082-17|Eulaema atleticana|COI-5P|KU134957	S
GBMIN73072-17|Eulaema atleticana|COI-5P|KU134980	S
GBMIN73147-17|Eulaema atleticana|COI-5P|KU135576	S
GBMIN73167-17|Eulaema atleticana|COI-5P|KU135588	S
GBMIN73149-17|Eulaema atleticana|COI-5P|KU135061	S
GBMIN72959-17|Eulaema atleticana|COI-5P|KU135442	S
GBMIN72929-17|Eulaema atleticana|COI-5P|KU135566	S
GBMIN73114-17|Eulaema atleticana|COI-5P|KU135286	S
GBMIN73171-17|Eulaema atleticana|COI-5P|KU135056	S
GBMIN73116-17|Eulaema atleticana|COI-5P|KU135263	S
GBMIN72939-17|Eulaema atleticana|COI-5P|KU135568	S
BBHYA036-12|Centris atripes|COI-5P	S
BBHYA037-12|Centris atripes|COI-5P	S
BBHYA045-12|Centris atripes|COI-5P	S
BBHYA038-12|Centris atripes|COI-5P	S
BBHYA034-12|Centris atripes|COI-5P	S
BBHYA044-12|Centris atripes|COI-5P	S
BEECC212-08|Centris atripes|COI-5P	S
BEECC270-08|Svastra atripes|COI-5P	S
BUSA001-05|Isepeolus atripilis|COI-5P	S
DIAL192-06|Eucera atriventris|COI-5P	S
FBAPC145-10|Nomada atroscutellaris|COI-5P|KJ839392	S
FBAPC146-10|Nomada atroscutellaris|COI-5P|KJ838079	S
FBHAP409-09|Nomada atroscutellaris|COI-5P|KJ838970	S
DRBEE104-07|Euglossa atroveneta|COI-5P	S
GBAH6258-09|Euglossa atroveneta|COI-5P|EU421562	S
GBAH6301-09|Euglossa augaspis|COI-5P|EU421519	S
HMBME124-07|Tetraloniella auricauda|COI-5P	S
HMBME123-07|Tetraloniella auricauda|COI-5P	S
GBMIN12297-13|Eufriesea auriceps|COI-5P|KC313064	S
GBMIN12327-13|Eufriesea auriceps|COI-5P|KC313063	S
DRBEE138-07|Eufriesea auripes|COI-5P	S
HYQT907-11|Braunsapis AUS01|COI-5P	S
PMAIA066-07|Xylocopa AUS01|COI-5P	S
HYQT130-08|Xylocopa AUS01|COI-5P	S
HYQT140-08|Xylocopa AUS01|COI-5P	S
HYQTB351-12|Braunsapis AUS03|COI-5P	S
HYQTB309-12|Braunsapis AUS03|COI-5P	S
HYQT917-11|Braunsapis AUS03|COI-5P	S
HYQT885-11|Braunsapis AUS03|COI-5P	S
HYQT169-08|Braunsapis AUS03|COI-5P	S
HYQT912-11|Braunsapis AUS03|COI-5P	S
HYQT091-08|Braunsapis AUS03|COI-5P	S
MSAPB1306-12|Ceratina australensis|COI-5P	S
MSAPB1308-12|Ceratina australensis|COI-5P	S
MSAPB1309-12|Ceratina australensis|COI-5P	S
MSAPB1305-12|Ceratina australensis|COI-5P	S
HYQTB208-12|Nomada australensis|COI-5P	S
HYQTB191-12|Nomada australensis|COI-5P	S
HYQTB284-12|Nomada australensis|COI-5P	S
HYQT057-08|Nomada australensis|COI-5P	S
HYQT061-08|Nomada australensis|COI-5P	S
HYQT062-08|Nomada australensis|COI-5P	S
TTHYW062-08|Diadasia australis|COI-5P|KR884555	S
HMBME068-07|Diadasia australis|COI-5P	S
HMBME074-07|Diadasia australis|COI-5P	S
HMBME069-07|Diadasia australis|COI-5P	S
HMBME067-07|Diadasia australis|COI-5P	S
BOFWM271-08|Diadasia australis|COI-5P	S
BEECA541-06|Diadasia australis|COI-5P	S
HMBME078-07|Diadasia australis|COI-5P	S
SDBEE063-12|Diadasia australis|COI-5P	S
SDBEE064-12|Diadasia australis|COI-5P	S
BEECA055-06|Nomada australis|COI-5P|FJ582342	S
BEECA054-06|Nomada australis|COI-5P|FJ582343	S
BEECA056-06|Nomada australis|COI-5P|FJ582341	S
HGPPH088-10|Epeolus autumnalis|COI-5P|KR790471	S
BEECA188-06|Epeolus autumnalis|COI-5P|FJ582214	S
RBINA4142-13|Epeolus autumnalis|COI-5P|KR875009	S
RBINA4018-13|Epeolus autumnalis|COI-5P|KR881775	S
RBINA4144-13|Epeolus autumnalis|COI-5P|KR882821	S
CRHIC179-15|Epeolus autumnalis|COI-5P|MG442871	S
RBINA4149-13|Epeolus autumnalis|COI-5P|KR892584	S
BEECA187-06|Epeolus autumnalis|COI-5P|FJ582215	S
HDBNS204-04|Epeolus autumnalis|COI-5P|FJ582216	S
HDBNS205-04|Epeolus autumnalis|COI-5P|FJ582213	S
BEECC414-08|Nomada AZ01|COI-5P	S
GBAH6201-09|Exaerete azteca|COI-5P|EU163093	S
GBAH6263-09|Exaerete azteca|COI-5P|EU421557	S
BOFWM089-08|Peponapis azteca|COI-5P	S
DRBEE122-07|Euglossa azureoviridis|COI-5P	S
DRBEE125-07|Euglossa azureoviridis|COI-5P	S
GBAH6279-09|Euglossa azureoviridis|COI-5P|EU421541	S
FBAPC485-11|Anthophora balneorum|COI-5P|KJ837113	S
FBAPC486-11|Anthophora balneorum|COI-5P|KJ839342	S
BEECB578-07|Nomada BC01|COI-5P	S
BEECC193-08|Nomada BC02|COI-5P	S
BEECB852-07|Nomada BC02|COI-5P	S
BEECB872-07|Nomada BC02|COI-5P	S
BEECB850-07|Nomada BC03|COI-5P	S
BEECB599-07|Nomada BC03|COI-5P	S
BEECB849-07|Nomada BC1|COI-5P	S
BEECB846-07|Nomada BC1|COI-5P	S
JSHYN426-11|Nomada bc9|COI-5P|KR804344	S
HDBNS143-03|Nomada bella|COI-5P|FJ582345	S
HCBNS094-03|Nomada bella|COI-5P|FJ582346	S
HDBNS145-03|Nomada bella|COI-5P|FJ582344	S
BEECA629-06|Nomada bella|COI-5P	S
RRMFA257-15|Nomada bella|COI-5P|KT622833	S
SMTPB11270-13|Nomada bella|COI-5P|KR873918	S
GBAH5178-09|Macrogalea berentyensis|COI-5P|EF103591	S
UPOLB801-09|Nomada bethunei|COI-5P	S
UPOLB854-09|Nomada bethunei|COI-5P	S
UPOLB837-09|Nomada bethunei|COI-5P	S
BEECA569-06|Nomada bethunei|COI-5P	S
GBHAP042-13|Nomada bethunei|COI-5P|HQ204765	S
GBHAP045-13|Nomada bethunei|COI-5P|HQ204762	S
GBHAP046-13|Nomada bethunei|COI-5P|HQ204761	S
BEECA459-06|Nomada bethunei|COI-5P	S
GBHAP043-13|Nomada bethunei|COI-5P|HQ204764	S
GBHAP044-13|Nomada bethunei|COI-5P|HQ204763	S
ASINH934-12|Mesocheira bicolor|COI-5P	S
LASNA670-08|Pachymelus bicolor|COI-5P	S
BEECC602-09|Melissodes bicolorata|COI-5P	S
BEECC601-09|Melissodes bicolorata|COI-5P	S
GBMIN142753-18|Eucera bidentata|COI-5P|MG251051	S
DRBEE033-07|Euglossa bidentata|COI-5P	S
GBAH6248-09|Euglossa bidentata|COI-5P|EU421572	S
FBAPC155-10|Nomada bifasciata|COI-5P|KJ837696	S
GBACU1655-12|Nomada bifasciata|COI-5P|KJ836567	S
GBSYM2318-13|Nomada bifasciata|COI-5P|KJ839249	S
FBAPB138-09|Nomada bifasciata|COI-5P|HM401039	S
FBAPB140-09|Nomada bifasciata|COI-5P|HM401041	S
GBACU2001-12|Nomada bifasciata|COI-5P|KJ836668	S
GBACU2002-12|Nomada bifasciata|COI-5P|KJ838751	S
FBAPB139-09|Nomada bifasciata|COI-5P|HM401040	S
FBAPB184-09|Nomada bifasciata|COI-5P|HM401064	S
FBHAP430-09|Nomada bifasciata|COI-5P|KJ837990	S
ABEE154-17|Nomada bifasciata|COI-5P	S
GMGMH1441-14|Nomada bifasciata|COI-5P	S
BOFWM085-08|Triepeolus bilineatus|COI-5P	S
BOFWM086-08|Triepeolus bilineatus|COI-5P	S
FBAPB427-09|Anthophora bimaculata|COI-5P|HM401133	S
GBACU2099-13|Anthophora bimaculata|COI-5P|KJ837932	S
FBACB703-11|Anthophora bimaculata|COI-5P|KJ836493	S
GBACU1227-12|Anthophora bimaculata|COI-5P|KJ837025	S
GBACU1162-12|Anthophora bimaculata|COI-5P|KJ839592	S
GBACU1228-12|Anthophora bimaculata|COI-5P|KJ837754	S
FBAPC480-11|Anthophora bimaculata|COI-5P|KJ837416	S
FBAPC531-11|Anthophora bimaculata|COI-5P|KJ838268	S
GBACU1163-12|Anthophora bimaculata|COI-5P|KJ837132	S
FBACB702-11|Anthophora bimaculata|COI-5P|KJ837906	S
FBAPC171-10|Anthophora bimaculata|COI-5P|KJ838472	S
GBACU087-12|Anthophora bimaculata|COI-5P|KJ839272	S
GBACU1225-12|Anthophora bimaculata|COI-5P|KJ836998	S
GBACU1226-12|Anthophora bimaculata|COI-5P|KJ836491	S
BEEEE205-15|Anthophora bimaculata|COI-5P	S
BEEEE081-15|Anthophora bimaculata|COI-5P	S
FBAPB428-09|Anthophora bimaculata|COI-5P|KJ839064	S
FBAPB429-09|Anthophora bimaculata|COI-5P|HM401134	S
BBHYA856-12|Melissodes bimaculata|COI-5P	S
BEECA393-06|Melissodes bimaculata|COI-5P	S
BEECA352-06|Melissodes bimaculata|COI-5P	S
BEECA307-06|Melissodes bimaculata|COI-5P	S
BEECA152-06|Melissodes bimaculata|COI-5P	S
BEECA151-06|Melissodes bimaculata|COI-5P	S
BBHYA1303-12|Melissodes bimaculata|COI-5P	S
BEECC606-09|Melissodes bimatris|COI-5P	S
BEECC607-09|Melissodes bimatris|COI-5P	S
BEECC564-08|Diadasia bituberculata|COI-5P	S
BEECC563-08|Diadasia bituberculata|COI-5P	S
DRBEE164-07|Eufriesea black sp.|COI-5P	S
ABEE069-17|Nomada bluethgeni|COI-5P	S
FBAPB185-09|Nomada bluethgeni|COI-5P|HQ948021	S
LASNA459-08|Tetrapedia BOL1|COI-5P	S
LASNA365-08|Tetrapedia BOL1|COI-5P	S
GBAH6327-09|Eulaema boliviensis|COI-5P|EU421493	S
BEECC504-08|Melissodes boltoniae|COI-5P	S
ASINH464-12|Eulaema bombiformis|COI-5P	S
OBP016-05|Eulaema bombiformis|COI-5P	S
OBP019-05|Eulaema bombiformis|COI-5P	S
OBP018-05|Eulaema bombiformis|COI-5P	S
ASINH456-12|Eulaema bombiformis|COI-5P	S
OBP017-05|Eulaema bombiformis|COI-5P	S
ASINH461-12|Eulaema bombiformis|COI-5P	S
OBP020-05|Eulaema bombiformis|COI-5P	S
ASINH460-12|Eulaema bombiformis|COI-5P	S
GBAH6296-09|Eulaema bombiformis|COI-5P|EU421524	S
GBAH0573-06|Eulaema bombiformis|COI-5P|AJ582624	S
BBHYA083-12|Ptilothrix bombiformis|COI-5P	S
BBHYA082-12|Ptilothrix bombiformis|COI-5P	S
BBHYA561-12|Ptilothrix bombiformis|COI-5P	S
BBHYA039-12|Ptilothrix bombiformis|COI-5P	S
BBHYA048-12|Ptilothrix bombiformis|COI-5P	S
BBHYA047-12|Ptilothrix bombiformis|COI-5P	S
BUSA157-05|Ptilothrix bombiformis|COI-5P	S
BUSA155-05|Ptilothrix bombiformis|COI-5P	S
BUSA156-05|Ptilothrix bombiformis|COI-5P	S
BEECA350-06|Ptilothrix bombiformis|COI-5P	S
BEECA351-06|Ptilothrix bombiformis|COI-5P	S
BEECA006-06|Anthophora bomboides|COI-5P	S
BEECB1005-07|Anthophora bomboides|COI-5P|FJ582084	S
BEECB1006-07|Anthophora bomboides|COI-5P|FJ582083	S
BEECC545-08|Anthophora bomboides|COI-5P	S
BEECC546-08|Anthophora bomboides|COI-5P	S
BEECC801-09|Anthophora bomboides|COI-5P	S
BEECC411-08|Anthophora bomboides|COI-5P	S
BEECC804-09|Anthophora bomboides|COI-5P	S
BEECC805-09|Anthophora bomboides|COI-5P	S
BEECA007-06|Anthophora bomboides|COI-5P	S
BEECA005-06|Anthophora bomboides|COI-5P	S
BEECA004-06|Anthophora bomboides|COI-5P	S
BEECC806-09|Anthophora bomboides|COI-5P	S
BEECC807-09|Anthophora bomboides|COI-5P	S
ABBOL036-15|Ceratina boninensis|COI-5P	S
ABBOL037-15|Ceratina boninensis|COI-5P	S
GBAH1908-06|Compsomelissa borneri|COI-5P|DQ149675	S
BOWGF138-08|Thyreus bouyssoui|COI-5P	S
HDBNS207-04|Triepeolus brittaini|COI-5P|FJ582507	S
BEECA717-07|Triepeolus brittaini|COI-5P|FJ582505	S
BEECA716-07|Triepeolus brittaini|COI-5P|FJ582506	S
BEECA718-07|Triepeolus brittaini|COI-5P|FJ582504	S
BOFTW005-08|Caenonomada bruneri|COI-5P	S
DRBEE132-07|Euglossa bursigera|COI-5P	S
OBP073-05|Euglossa bursigera|COI-5P	S
OBP075-05|Euglossa bursigera|COI-5P	S
OBP074-05|Euglossa bursigera|COI-5P	S
OBP072-05|Euglossa bursigera|COI-5P	S
OBP076-05|Euglossa bursigera|COI-5P	S
ASINH167-12|Euglossa bursigera|COI-5P	S
ASINH171-12|Euglossa bursigera|COI-5P	S
ASINH168-12|Euglossa bursigera|COI-5P	S
ASINH165-12|Euglossa bursigera|COI-5P	S
ASINH169-12|Euglossa bursigera|COI-5P	S
ASINH172-12|Euglossa bursigera|COI-5P	S
GBAH1608-06|Euglossa bursigera|COI-5P|AY920305	S
GBAH6247-09|Euglossa bursigera|COI-5P|EU421573	S
BEECB820-07|Anthophora CA-1|COI-5P	S
BEECB819-07|Anthophora CA-1|COI-5P	S
DRBEE054-07|Aglae caerulea|COI-5P	S
GBAH0576-06|Aglae caerulea|COI-5P|AJ582627	S
GBAH6278-09|Aglae caerulea|COI-5P|EU421542	S
GBAH6203-09|Aglae caerulea|COI-5P|EU163091	S
DRBEE144-07|Eufriesea caerulea|COI-5P	S
BOFWM233-08|Eufriesea caerulescens|COI-5P	S
GBAH6199-09|Eufriesea caerulescens|COI-5P|EU163095	S
GBAH6236-09|Eufriesea caerulescens|COI-5P|EU421584	S
BBHYA040-12|Centris caesalpiniae|COI-5P	S
BBHYA043-12|Centris caesalpiniae|COI-5P	S
BBHYA035-12|Centris caesalpiniae|COI-5P	S
BBHYA041-12|Centris caesalpiniae|COI-5P	S
BBHYA042-12|Centris caesalpiniae|COI-5P	S
LASNA437-08|Xylocopa caffra|COI-5P	S
HYAS1231-12|Xylocopa caffra|COI-5P	S
BEECD125-09|Ceratina calcarata|COI-5P|GU707527	S
BEECD120-09|Ceratina calcarata|COI-5P|GU707530	S
BEECD131-09|Ceratina calcarata|COI-5P|GU707517	S
BEECD124-09|Ceratina calcarata|COI-5P|GU707526	S
BEECB989-07|Ceratina calcarata|COI-5P|FJ582164	S
BEECB990-07|Ceratina calcarata|COI-5P|FJ582163	S
BEECB987-07|Ceratina calcarata|COI-5P|FJ582165	S
BEECD144-09|Ceratina calcarata|COI-5P|GU707505	S
BEECD123-09|Ceratina calcarata|COI-5P|GU707525	S
BEECD128-09|Ceratina calcarata|COI-5P|GU707522	S
ASGCB249-13|Ceratina calcarata|COI-5P	S
BEECD145-09|Ceratina calcarata|COI-5P|GU707506	S
BEECD054-09|Ceratina calcarata|COI-5P|GU707599	S
UPOLB542-09|Ceratina calcarata|COI-5P|JF271024	S
UPOLL944-09|Ceratina calcarata|COI-5P|JF271033	S
BEECD116-09|Ceratina calcarata|COI-5P|GU707534	S
UPOLB760-09|Ceratina calcarata|COI-5P|JF271018	S
BEECD126-09|Ceratina calcarata|COI-5P|GU707528	S
UPOLB536-09|Ceratina calcarata|COI-5P|JF271025	S
UPOLB751-09|Ceratina calcarata|COI-5P|JF271019	S
UPOLB179-09|Ceratina calcarata|COI-5P|JF271026	S
UPOLL866-09|Ceratina calcarata|COI-5P|JF271034	S
UPOLB150-09|Ceratina calcarata|COI-5P|JF271027	S
UPOLB574-09|Ceratina calcarata|COI-5P|JF271020	S
UPOLL814-09|Ceratina calcarata|COI-5P|JF271035	S
DIAL263-06|Ceratina calcarata|COI-5P|JF271016	S
UPOLB570-09|Ceratina calcarata|COI-5P|JF271023	S
BEECD119-09|Ceratina calcarata|COI-5P|GU707529	S
BEECD117-09|Ceratina calcarata|COI-5P|GU707535	S
BEECD171-09|Ceratina calcarata|COI-5P|GU707484	S
BEECD121-09|Ceratina calcarata|COI-5P|GU707531	S
BEECD130-09|Ceratina calcarata|COI-5P|GU707524	S
BEECD122-09|Ceratina calcarata|COI-5P|GU707532	S
BEECD115-09|Ceratina calcarata|COI-5P|GU707533	S
BEECD172-09|Ceratina calcarata|COI-5P|GU707477	S
BEECD165-09|Ceratina calcarata|COI-5P|GU707486	S
UPOLB572-09|Ceratina calcarata|COI-5P|JF271021	S
BEECD127-09|Ceratina calcarata|COI-5P|GU707521	S
BEECD118-09|Ceratina calcarata|COI-5P|GU707536	S
BEECD132-09|Ceratina calcarata|COI-5P|GU707518	S
BEECD112-09|Ceratina calcarata|COI-5P|GU707539	S
UPOLB571-09|Ceratina calcarata|COI-5P|JF271022	S
BEECD137-09|Ceratina calcarata|COI-5P|GU707514	S
UPOLC049-09|Ceratina calcarata|COI-5P|JF271028	S
UPOLC031-09|Ceratina calcarata|COI-5P|JF271029	S
UPOLC066-09|Ceratina calcarata|COI-5P|JF271032	S
BUSA117-05|Ceratina calcarata|COI-5P	S
UPOLC067-09|Ceratina calcarata|COI-5P|JF271031	S
DIAL146-06|Ceratina calcarata|COI-5P|JF271017	S
HDBNS211-04|Ceratina calcarata|COI-5P|FJ582167	S
HDBNS209-04|Ceratina calcarata|COI-5P|FJ582166	S
HCBNS227-03|Ceratina calcarata|COI-5P|FJ582168	S
BEECD136-09|Ceratina calcarata|COI-5P|GU707513	S
BEECD135-09|Ceratina calcarata|COI-5P|GU707520	S
GBMIN73380-17|Ceratina calcarata|COI-5P|KP747157	S
GBMIN73379-17|Ceratina calcarata|COI-5P|KP747156	S
GBMIN73377-17|Ceratina calcarata|COI-5P|KP747161	S
GBMIN73394-17|Ceratina calcarata|COI-5P|KP747167	S
GBMIN73378-17|Ceratina calcarata|COI-5P|KP747155	S
GBMIN73386-17|Ceratina calcarata|COI-5P|KP747138	S
GBMIN73391-17|Ceratina calcarata|COI-5P|KP747179	S
GBMIN73370-17|Ceratina calcarata|COI-5P|KP747147	S
GBMIN73395-17|Ceratina calcarata|COI-5P|KP747177	S
GBMIN73392-17|Ceratina calcarata|COI-5P|KP747151	S
GBMIN73368-17|Ceratina calcarata|COI-5P|KP747141	S
GBMIN73372-17|Ceratina calcarata|COI-5P|KP747149	S
GBMIN73396-17|Ceratina calcarata|COI-5P|KP747165	S
GBMIN73410-17|Ceratina calcarata|COI-5P|KP747152	S
GBMIN73375-17|Ceratina calcarata|COI-5P|KP747159	S
GBMIN73408-17|Ceratina calcarata|COI-5P|KP747172	S
GBMIN73383-17|Ceratina calcarata|COI-5P|KP747139	S
GBMIN73401-17|Ceratina calcarata|COI-5P|KP747170	S
GBMIN73381-17|Ceratina calcarata|COI-5P|KP747140	S
GBMIN73398-17|Ceratina calcarata|COI-5P|KP747153	S
GBMIN73382-17|Ceratina calcarata|COI-5P|KP747162	S
GBMIN73366-17|Ceratina calcarata|COI-5P|KP747145	S
GBMIN73385-17|Ceratina calcarata|COI-5P|KP747163	S
GBMIN73397-17|Ceratina calcarata|COI-5P|KP747171	S
GBMIN73373-17|Ceratina calcarata|COI-5P|KP747150	S
GBMIN73374-17|Ceratina calcarata|COI-5P|KP747166	S
GBMIN73390-17|Ceratina calcarata|COI-5P|KP747135	S
GBMIN73365-17|Ceratina calcarata|COI-5P|KP747144	S
GBMIN73369-17|Ceratina calcarata|COI-5P|KP747142	S
GBMIN73371-17|Ceratina calcarata|COI-5P|KP747154	S
GBMIN73376-17|Ceratina calcarata|COI-5P|KP747160	S
GBMIN73402-17|Ceratina calcarata|COI-5P|KP747180	S
GBMIN73405-17|Ceratina calcarata|COI-5P|KP747168	S
GBMIN73389-17|Ceratina calcarata|COI-5P|KP747183	S
GBMIN73406-17|Ceratina calcarata|COI-5P|KP747175	S
GBMIN73403-17|Ceratina calcarata|COI-5P|KP747182	S
GBMIN73400-17|Ceratina calcarata|COI-5P|KP747174	S
GBMIN73404-17|Ceratina calcarata|COI-5P|KP747176	S
GBMIN73387-17|Ceratina calcarata|COI-5P|KP747164	S
GBMIN73393-17|Ceratina calcarata|COI-5P|KP747184	S
GBMIN73409-17|Ceratina calcarata|COI-5P|KP747173	S
GBMIN73399-17|Ceratina calcarata|COI-5P|KP747178	S
GBMIN73407-17|Ceratina calcarata|COI-5P|KP747181	S
GBMIN73388-17|Ceratina calcarata|COI-5P|KP747143	S
GBMIN73384-17|Ceratina calcarata|COI-5P|KP747136	S
BEEMH209-06|Ceratina calcarata|COI-5P|MG438819	S
BEEMH234-06|Ceratina calcarata|COI-5P|MG439071	S
BEEMH166-06|Ceratina calcarata|COI-5P|MG447610	S
GBMIN73367-17|Ceratina calcarata|COI-5P|KT123216	S
UPOLC030-09|Ceratina calcarata|COI-5P|JF271030	S
LASNA347-08|Thyreus calceatus|COI-5P	S
SABEE263-15|Amegilla calceifera|COI-5P	S
DOBEE488-15|Amegilla calceifera|COI-5P	S
DOBEE473-15|Amegilla calceifera|COI-5P	S
DOBEE507-15|Amegilla calceifera|COI-5P	S
DOBEE503-15|Amegilla calceifera|COI-5P	S
DOBEE506-15|Amegilla calceifera|COI-5P	S
SABEE747-15|Amegilla calceifera|COI-5P	S
SABEE695-15|Amegilla calceifera|COI-5P	S
SABEE691-15|Amegilla calceifera|COI-5P	S
SABEE692-15|Amegilla calceifera|COI-5P	S
BOWGF115-08|Amegilla calens|COI-5P	S
BEECB472-07|Anthophora californica|COI-5P	S
HMBME139-07|Anthophora californica|COI-5P	S
BEECB473-07|Anthophora californica|COI-5P	S
BBHYA869-12|Anthophora californica|COI-5P	S
BBHYA867-12|Anthophora californica|COI-5P	S
BBHYA868-12|Anthophora californica|COI-5P	S
BEECC755-09|Xeromelecta californica|COI-5P	S
BEECC757-09|Xeromelecta californica|COI-5P	S
BUSA007-05|Xeromelecta californica|COI-5P	S
BEECB548-07|Xeromelecta californica|COI-5P	S
BEECC756-09|Xeromelecta californica|COI-5P	S
BEECB476-07|Xeromelecta californica|COI-5P	S
BEECC436-08|Xeromelecta californica|COI-5P	S
BEECC435-08|Xeromelecta californica|COI-5P	S
BEECC853-09|Xeromelecta californica|COI-5P	S
BBHYA024-12|Xylocopa californica|COI-5P	S
BBHYA022-12|Xylocopa californica|COI-5P	S
BBHYA028-12|Xylocopa californica|COI-5P	S
BBHYA021-12|Xylocopa californica|COI-5P	S
BBHYA032-12|Xylocopa californica|COI-5P	S
BBHYA025-12|Xylocopa californica|COI-5P	S
BBHYA023-12|Xylocopa californica|COI-5P	S
BEECA049-06|Xylocopa californica arizonensis|COI-5P	S
SDBEE126-12|Triepeolus californicus|COI-5P	S
BEECA018-06|Holcopasites calliopsidis|COI-5P|FJ582233	S
BEECA017-06|Holcopasites calliopsidis|COI-5P|FJ582234	S
UPOLL657-09|Holcopasites calliopsidis|COI-5P	S
GBHAP296-13|Bombus canariensis|COI-5P|JQ769067	S
BOWGF127-08|Macrogalea candida|COI-5P	S
LASNA639-08|Macrogalea candida|COI-5P	S
LASNA544-08|Macrogalea candida|COI-5P	S
GBHAP156-13|Macrogalea candida|COI-5P|KC351817	S
GBACU054-12|Nomada castellana|COI-5P|KJ836916	S
FBAPB186-09|Nomada castellana|COI-5P|HM401065	S
FBAPC152-10|Nomada castellana|COI-5P|KJ838402	S
GBACU834-12|Nomada castellana|COI-5P|KJ837163	S
FBHAP424-09|Nomada castellana|COI-5P|KJ839016	S
BEECB475-07|Anthophora centriformis|COI-5P	S
BEECB474-07|Anthophora centriformis|COI-5P	S
GBAH1772-06|Apis cerana|COI-5P|DQ016071	S
LGEN053-13|Apis cerana|COI-5P	S
GBHAP218-13|Apis cerana|COI-5P|KC175543	S
GBHAP237-13|Apis cerana|COI-5P|KC175524	S
GBHAP234-13|Apis cerana|COI-5P|KC175527	S
GBHAP220-13|Apis cerana|COI-5P|KC175541	S
GBHAP223-13|Apis cerana|COI-5P|KC175538	S
GBHAP232-13|Apis cerana|COI-5P|KC175529	S
GBHAP229-13|Apis cerana|COI-5P|KC175532	S
GBHAP219-13|Apis cerana|COI-5P|KC175542	S
GBHAP224-13|Apis cerana|COI-5P|KC175537	S
GBHAP235-13|Apis cerana|COI-5P|KC175526	S
GBHAP226-13|Apis cerana|COI-5P|KC175535	S
GBHAP238-13|Apis cerana|COI-5P|KC175523	S
GBHAP225-13|Apis cerana|COI-5P|KC175536	S
GBHAP228-13|Apis cerana|COI-5P|KC175533	S
GBHAP217-13|Apis cerana|COI-5P|KC175544	S
GBHAP233-13|Apis cerana|COI-5P|KC175528	S
GBHAP231-13|Apis cerana|COI-5P|KC175530	S
GBHAP230-13|Apis cerana|COI-5P|KC175531	S
GBHAP236-13|Apis cerana|COI-5P|KC175525	S
GBHAP243-13|Apis cerana|COI-5P|KC175518	S
GBHAP273-13|Apis cerana|COI-5P|KC175488	S
GBHAP270-13|Apis cerana|COI-5P|KC175491	S
GBHAP255-13|Apis cerana|COI-5P|KC175506	S
GBHAP239-13|Apis cerana|COI-5P|KC175522	S
GBHAP252-13|Apis cerana|COI-5P|KC175509	S
GBHAP266-13|Apis cerana|COI-5P|KC175495	S
GBHAP254-13|Apis cerana|COI-5P|KC175507	S
GBHAP269-13|Apis cerana|COI-5P|KC175492	S
GBHAP246-13|Apis cerana|COI-5P|KC175515	S
GBHAP227-13|Apis cerana|COI-5P|KC175534	S
GBHAP263-13|Apis cerana|COI-5P|KC175498	S
GBHAP240-13|Apis cerana|COI-5P|KC175521	S
GBHAP250-13|Apis cerana|COI-5P|KC175511	S
GBHAP244-13|Apis cerana|COI-5P|KC175517	S
GBHAP256-13|Apis cerana|COI-5P|KC175505	S
GBHAP272-13|Apis cerana|COI-5P|KC175489	S
GBHAP260-13|Apis cerana|COI-5P|KC175501	S
GBHAP259-13|Apis cerana|COI-5P|KC175502	S
GBHAP258-13|Apis cerana|COI-5P|KC175503	S
GBHAP245-13|Apis cerana|COI-5P|KC175516	S
GBHAP267-13|Apis cerana|COI-5P|KC175494	S
GBHAP271-13|Apis cerana|COI-5P|KC175490	S
GBHAP268-13|Apis cerana|COI-5P|KC175493	S
GBHAP242-13|Apis cerana|COI-5P|KC175519	S
GBHAP247-13|Apis cerana|COI-5P|KC175514	S
GBHAP264-13|Apis cerana|COI-5P|KC175497	S
GBHAP251-13|Apis cerana|COI-5P|KC175510	S
GBHAP265-13|Apis cerana|COI-5P|KC175496	S
GBHAP249-13|Apis cerana|COI-5P|KC175512	S
GBHAP261-13|Apis cerana|COI-5P|KC175500	S
GBHAP253-13|Apis cerana|COI-5P|KC175508	S
GBHAP221-13|Apis cerana|COI-5P|KC175540	S
GBHAP262-13|Apis cerana|COI-5P|KC175499	S
GBHAP222-13|Apis cerana|COI-5P|KC175539	S
GBHAP257-13|Apis cerana|COI-5P|KC175504	S
GBHAP241-13|Apis cerana|COI-5P|KC175520	S
GBHAP248-13|Apis cerana|COI-5P|KC175513	S
GBMIN71665-17|Apis cerana|COI-5P|KX066385	S
GBMIN71675-17|Apis cerana|COI-5P|KX074080	S
GBMIN71686-17|Apis cerana|COI-5P|KX066381	S
GBMIN71655-17|Apis cerana|COI-5P|KX074084	S
GBMIN71695-17|Apis cerana|COI-5P|KX066380	S
GBMIN71683-17|Apis cerana|COI-5P|KX066382	S
GBMIN71692-17|Apis cerana|COI-5P|KX066390	S
GBMIN71682-17|Apis cerana|COI-5P|KX074081	S
GBMIN71685-17|Apis cerana|COI-5P|KX074082	S
GBMIN71691-17|Apis cerana|COI-5P|KX066384	S
GBMIN71677-17|Apis cerana|COI-5P|KX066391	S
GBMIN71696-17|Apis cerana|COI-5P|KX066387	S
GBMIN71668-17|Apis cerana|COI-5P|KX066388	S
GBMIN71667-17|Apis cerana|COI-5P|KX066378	S
GBMIN71661-17|Apis cerana|COI-5P|KX066377	S
GBMIN71698-17|Apis cerana|COI-5P|KX066379	S
GBMIN71688-17|Apis cerana|COI-5P|KX066393	S
GBMIN71690-17|Apis cerana|COI-5P|KX066392	S
GBMNA18956-19|Apis cerana japonica|COI-5P|AP017941	S
GBMNA18989-19|Apis cerana|COI-5P|AP018431	S
GBMNA17751-19|Apis cerana|COI-5P|KX908206	S
GBMTG1777-16|Apis cerana|COI-5P|NC_014295	S
GBHAP867-14|Apis cerana|COI-5P|KM066956	S
GBHAP866-14|Apis cerana|COI-5P|KM066955	S
GBHAP860-14|Apis cerana|COI-5P|KM066954	S
GBHAP861-14|Apis cerana|COI-5P|KM066951	S
GBHAP873-14|Apis cerana|COI-5P|KM066957	S
GBHAP862-14|Apis cerana|COI-5P|KM066960	S
GBHAP874-14|Apis cerana|COI-5P|KM066959	S
GBHAP863-14|Apis cerana|COI-5P|KM066962	S
GBHAP869-14|Apis cerana|COI-5P|KM066961	S
GBHAP868-14|Apis cerana|COI-5P|KM066958	S
GBHAP864-14|Apis cerana|COI-5P|KM066952	S
GBHAP865-14|Apis cerana|COI-5P|KM066953	S
GBHAP872-14|Apis cerana|COI-5P|KM066965	S
GBHAP871-14|Apis cerana|COI-5P|KM066964	S
GBHAP870-14|Apis cerana|COI-5P|KM066963	S
GBAH0281-06|Apis cerana|COI-5P|AF153107	S
GBAH0282-06|Apis cerana|COI-5P|AF153108	S
GBAH0283-06|Apis cerana|COI-5P|AF153109	S
GBAH0280-06|Apis cerana|COI-5P|AF153106	S
GBAH0908-06|Apis cerana|COI-5P|AY311385	S
GBAH0298-06|Apis cerana|COI-5P|AF250945	S
GBAH0279-06|Apis cerana|COI-5P|AF153105	S
GBAH0278-06|Apis cerana|COI-5P|AF153104	S
GBAH2509-07|Apis cerana|COI-5P|DQ020238	S
GBAH2505-07|Apis cerana|COI-5P|DQ020242	S
GBAH2510-07|Apis cerana|COI-5P|DQ020237	S
GBAH2504-07|Apis cerana|COI-5P|DQ020243	S
GBAH2501-07|Apis cerana|COI-5P|DQ020246	S
GBAH2502-07|Apis cerana|COI-5P|DQ020245	S
GBAH2503-07|Apis cerana|COI-5P|DQ020244	S
GBAH2506-07|Apis cerana|COI-5P|DQ020241	S
GBAH2507-07|Apis cerana|COI-5P|DQ020240	S
GBAH2511-07|Apis cerana|COI-5P|DQ020236	S
GBAH2508-07|Apis cerana|COI-5P|DQ020239	S
GBAH1790-06|Apis cerana|COI-5P|DQ016089	S
GBAH1791-06|Apis cerana|COI-5P|DQ016090	S
GBAH1789-06|Apis cerana|COI-5P|DQ016088	S
GBAH6188-09|Apis cerana|COI-5P|EU163106	S
GBAH0277-06|Apis cerana|COI-5P|AF153103	S
GBAH1792-06|Apis cerana|COI-5P|DQ016091	S
GBAH1793-06|Apis cerana|COI-5P|DQ016092	S
GBAH1785-06|Apis cerana|COI-5P|DQ016084	S
GBAH1794-06|Apis cerana|COI-5P|DQ016093	S
GBAH1796-06|Apis cerana|COI-5P|DQ016095	S
GBAH1787-06|Apis cerana|COI-5P|DQ016086	S
GBAH0275-06|Apis cerana|COI-5P|AF153101	S
GBAH1795-06|Apis cerana|COI-5P|DQ016094	S
GBAH1797-06|Apis cerana|COI-5P|DQ016096	S
GBAH0610-06|Apis cerana|COI-5P|AY012722	S
GBAH1786-06|Apis cerana|COI-5P|DQ016085	S
GBAH0276-06|Apis cerana|COI-5P|AF153102	S
GBAH1788-06|Apis cerana|COI-5P|DQ016087	S
GBAH2499-07|Apis cerana|COI-5P|DQ078750	S
GBMNA18966-19|Apis cerana|COI-5P|AP018149	S
GBAH6186-09|Apis cerana|COI-5P|EU163108	S
GBMIN71684-17|Apis cerana|COI-5P|KX113628	S
POMK002-12|Apis cerana|COI-5P|KF200068	S
POMK038-12|Apis cerana|COI-5P|KF200063	S
POMK003-12|Apis cerana|COI-5P|KF200072	S
POMK004-12|Apis cerana|COI-5P|KF200070	S
POMK039-12|Apis cerana|COI-5P|KF200069	S
GBMIN7786-12|Apis cerana|COI-5P|JQ350726	S
GBMIN33977-13|Apis cerana|COI-5P|JF700127	S
GBHAP298-14|Apis cerana|COI-5P|KM207071	S
GBMIN71676-17|Apis cerana|COI-5P|KU212336	S
GBMIN71679-17|Apis cerana|COI-5P|KU212341	S
GBMIN71681-17|Apis cerana|COI-5P|KU212339	S
GBMIN71697-17|Apis cerana|COI-5P|KU212340	S
GBMIN71664-17|Apis cerana|COI-5P|KU212337	S
GBMIN71663-17|Apis cerana|COI-5P|KU212338	S
GBHAP879-14|Apis cerana|COI-5P|KF760521	S
GBHAP876-14|Apis cerana|COI-5P|KF760518	S
GBHAP886-14|Apis cerana indica|COI-5P|KF861941	S
GBMIN71656-17|Apis cerana|COI-5P|KU963190	S
GBMIN71678-17|Apis cerana|COI-5P|KU963188	S
GBMIN71669-17|Apis cerana|COI-5P|KY072102	S
GBMIN71687-17|Apis cerana|COI-5P|KY072363	S
GBMIN71670-17|Apis cerana|COI-5P|KY072201	S
GBMIN71673-17|Apis cerana|COI-5P|KY072106	S
GBMIN71671-17|Apis cerana|COI-5P|KY072364	S
GBMIN71672-17|Apis cerana|COI-5P|KY072182	S
GBMIN71660-17|Apis cerana|COI-5P|KY072130	S
GBMIN71693-17|Apis cerana|COI-5P|KY072113	S
GBMIN71657-17|Apis cerana|COI-5P|KY072202	S
GBMIN71689-17|Apis cerana|COI-5P|KY072089	S
GBMIN71680-17|Apis cerana|COI-5P|KY072088	S
GBMIN71694-17|Apis cerana|COI-5P|KY072183	S
GBMIN71659-17|Apis cerana|COI-5P|KY072107	S
GBHAP1375-15|Apis cerana cerana|COI-5P|KM242599	S
GBHAP1374-15|Apis cerana cerana|COI-5P|KM242598	S
GBHAP1371-15|Apis cerana cerana|COI-5P|KM242595	S
GBHAP1370-15|Apis cerana cerana|COI-5P|KM242594	S
GBHAP1369-15|Apis cerana cerana|COI-5P|KM242593	S
GBHAP1377-15|Apis cerana cerana|COI-5P|KM242601	S
GBHAP1376-15|Apis cerana cerana|COI-5P|KM242600	S
GBHAP1378-15|Apis cerana cerana|COI-5P|KM242602	S
GBHAP1373-15|Apis cerana cerana|COI-5P|KM242597	S
GBHAP1372-15|Apis cerana cerana|COI-5P|KM242596	S
GBMIN71666-17|Apis cerana|COI-5P|KU963187	S
GBMIN71674-17|Apis cerana|COI-5P|KU963189	S
GBHAP880-14|Apis cerana|COI-5P|KF760522	S
GBHAP878-14|Apis cerana|COI-5P|KF760520	S
AGIRI284-17|Apis cerana|COI-5P	S
GBHAP883-14|Apis cerana|COI-5P|KF760525	S
GBHAP885-14|Apis cerana|COI-5P|KF760527	S
GBHAP882-14|Apis cerana|COI-5P|KF760524	S
GBHAP881-14|Apis cerana|COI-5P|KF760523	S
GBHAP877-14|Apis cerana|COI-5P|KF760519	S
GBHAP1387-15|Apis cerana|COI-5P|KM230116	S
GBMIN71658-17|Apis cerana|COI-5P|KM593935	S
GBMIN71662-17|Apis cerana|COI-5P|KM495731	S
GBHAP216-13|Apis cerana|COI-5P|KC414930	S
GBHAP884-14|Apis cerana|COI-5P|KF760526	S
GBMIN71654-17|Apis cerana|COI-5P|KX587509	S
SDBEE040-12|Anthophora cf. crotchii|COI-5P	S
SDBEE039-12|Anthophora cf. californica|COI-5P	S
ARTNO111-17|Bombus cf. magnus|COI-5P	S
ARTNO105-17|Bombus cf. magnus|COI-5P	S
SDBEE068-12|Diadasia cf. martialis|COI-5P	S
SDBEE073-12|Diadasia cf. nitidifrons|COI-5P	S
SDBEE072-12|Diadasia cf. nitidifrons|COI-5P	S
SDBEE069-12|Diadasia cf. diminuta|COI-5P	S
SDBEE070-12|Diadasia cf. laticauda|COI-5P	S
SDBEE071-12|Diadasia cf. laticauda|COI-5P	S
SDBEE065-12|Diadasia cf. macswaini|COI-5P	S
SDBEE081-12|Eucera cf. actuosa|COI-5P	S
GBAH1617-06|Euglossa cf. variabilis SR417|COI-5P|AY920314	S
SDBEE106-12|Melissodes cf. tessellata|COI-5P	S
SDBEE107-12|Melissodes cf. communis alopex|COI-5P	S
ARTNO109-17|Nomada cf. panzeri|COI-5P	S
ARTNO166-17|Nomada cf. alboguttata|COI-5P	S
ARTNO104-17|Nomada cf. panzeri|COI-5P	S
ARTNO164-17|Nomada cf. tormentillae|COI-5P	S
ARTNO163-17|Nomada cf. tormentillae|COI-5P	S
ARTNO102-17|Nomada cf. panzeri|COI-5P	S
ARTNO098-17|Nomada cf. lathburiana|COI-5P	S
ARTNO100-17|Nomada cf. panzeri|COI-5P	S
ARTNO162-17|Nomada cf. tormentillae|COI-5P	S
ARTNO165-17|Nomada cf. tormentillae|COI-5P	S
SDBEE117-12|Oreopasites cf. vanduzeei|COI-5P	S
SDBEE120-12|Tetraloniella cf. pomonae|COI-5P	S
SDBEE121-12|Tetraloniella cf. pomonae|COI-5P	S
SDBEE124-12|Tetraloniella cf. pomonae|COI-5P	S
SDBEE122-12|Tetraloniella cf. pomonae|COI-5P	S
SDBEE123-12|Tetraloniella cf. pomonae|COI-5P	S
GBAH6282-09|Eufriesea chalybaea|COI-5P|EU421538	S
GMGMA745-14|Ceratina chalybea|COI-5P	S
ABEE008-17|Ceratina chalybea|COI-5P	S
FBAPD418-11|Ceratina chalybea|COI-5P|KJ839531	S
FBAPD415-11|Ceratina chalybea|COI-5P|KJ836424	S
FBAPD416-11|Ceratina chalybea|COI-5P|KJ837460	S
FBAPC491-11|Ceratina chalybea|COI-5P|KJ839312	S
FBAPD108-11|Ceratina chalybea|COI-5P|KJ838134	S
FBAPC758-11|Ceratina chalybea|COI-5P|KJ839340	S
FBAPD107-11|Ceratina chalybea|COI-5P|KJ839208	S
FBAPD109-11|Ceratina chalybea|COI-5P|KJ836933	S
FBAPD110-11|Ceratina chalybea|COI-5P|KJ837443	S
BCHYM432-13|Ceratina chalybea|COI-5P|KJ838779	S
FBAPD417-11|Ceratina chalybea|COI-5P|KJ836987	S
BCHYM431-13|Ceratina chalybea|COI-5P|KJ836835	S
FBAPC759-11|Ceratina chalybea|COI-5P|KJ837695	S
FBAPB472-09|Ceratina chalybea|COI-5P|KJ837647	S
FBAPB470-09|Ceratina chalybea|COI-5P|KJ838586	S
FBAPB471-09|Ceratina chalybea|COI-5P|KJ839199	S
FBAPB469-09|Ceratina chalybea|COI-5P|KJ838017	S
ABEE007-17|Ceratina chalybea|COI-5P	S
DRBEE171-07|Euglossa chalybeata|COI-5P	S
GBAH6307-09|Euglossa chalybeata|COI-5P|EU421513	S
ASINH174-12|Euglossa championi|COI-5P	S
ASINH179-12|Euglossa championi|COI-5P	S
ASINH180-12|Euglossa championi|COI-5P	S
ASINH182-12|Euglossa championi|COI-5P	S
ASINH178-12|Euglossa championi|COI-5P	S
ASINH181-12|Euglossa championi|COI-5P	S
ASINH183-12|Euglossa championi|COI-5P	S
ASINH184-12|Euglossa championi|COI-5P	S
DRBEE039-07|Euglossa championi|COI-5P	S
GBAH6323-09|Euglossa championi|COI-5P|EU421497	S
DRBEE165-07|Euglossa chlorina|COI-5P	S
DRBEE108-07|Euglossa chlorina|COI-5P	S
GBAH1609-06|Euglossa chlorina|COI-5P|AY920306	S
GBAH6295-09|Euglossa chlorina|COI-5P|EU421525	S
GBAH6242-09|Eulaema chocoana|COI-5P|EU421578	S
BOWGF166-08|Ceratina chrysomalla|COI-5P	S
FBAPD885-11|Eucera chrysopyga|COI-5P|KJ837477	S
FBAPD886-11|Eucera chrysopyga|COI-5P|KJ837104	S
FBAPD884-11|Eucera chrysopyga|COI-5P|KJ836791	S
GBAH6313-09|Eufriesea chrysopyga|COI-5P|EU421507	S
FBAPB544-09|Eucera cineraria|COI-5P|HQ948060	S
FBAPB546-09|Eucera cineraria|COI-5P|KJ838007	S
FBAPB547-09|Eucera cineraria|COI-5P|HQ948061	S
FBAPC186-10|Eucera cineraria|COI-5P|KJ838181	S
FBAPC184-10|Eucera cineraria|COI-5P|KJ839288	S
FBAPC185-10|Eucera cineraria|COI-5P|KJ837813	S
FBAPC187-10|Eucera cineraria|COI-5P|KJ836627	S
FBAPB545-09|Eucera cineraria|COI-5P|KJ838340	S
CNGSB031-15|Habropoda cineraria|COI-5P|MF938820	S
GBMIN71589-17|Amegilla cingulata|COI-5P|KY485639	S
GBMIN71590-17|Amegilla cingulata|COI-5P|KY485638	S
PMNHN384-15|Amegilla cingulata|COI-5P|KY842920	S
ASINH470-12|Eulaema cingulata|COI-5P	S
OBP080-05|Eulaema cingulata|COI-5P	S
OBP079-05|Eulaema cingulata|COI-5P	S
OBP077-05|Eulaema cingulata|COI-5P	S
OBP078-05|Eulaema cingulata|COI-5P	S
ASINH473-12|Eulaema cingulata|COI-5P	S
DRBEE066-07|Eulaema cingulata|COI-5P	S
ASINH465-12|Eulaema cingulata|COI-5P	S
OBP081-05|Eulaema cingulata|COI-5P	S
ASINH475-12|Eulaema cingulata|COI-5P	S
GBAH6319-09|Eulaema cingulata|COI-5P|EU421501	S
GBAH0572-06|Eulaema cingulata|COI-5P|AJ581117	S
GBMIN142759-18|Eucera clypeata|COI-5P|MG251057	S
BEECC245-08|Nomada CO1|COI-5P	S
BUSA208-05|Ceratina cockerelli|COI-5P	S
BEECC342-08|Ceratina cockerelli|COI-5P	S
FBAPB521-09|Epeoloides coecutiens|COI-5P|HM401154	S
FBHAP402-09|Epeoloides coecutiens|COI-5P|GU706014	S
FBAPB522-09|Epeoloides coecutiens|COI-5P|KJ838491	S
FBHAP198-09|Epeoloides coecutiens|COI-5P|GU705969	S
BOFTH382-09|Ceratina cognata|COI-5P	S
BOFTH384-09|Ceratina cognata|COI-5P	S
DRBEE185-07|Euglossa cognata|COI-5P	S
DRBEE031-07|Euglossa cognata|COI-5P	S
OBP050-05|Euglossa cognata|COI-5P	S
OBP053-05|Euglossa cognata|COI-5P	S
OBP049-05|Euglossa cognata|COI-5P	S
GBAH6310-09|Euglossa cognata|COI-5P|EU421510	S
LASNA689-08|Ceratina COL07|COI-5P	S
LASNA783-08|Ceratina COL07|COI-5P	S
GBAH0288-06|Xylocopa collaris|COI-5P|AF153114	S
BEECB575-07|Melissodes communis|COI-5P	S
BEECC549-08|Melissodes communis alopex|COI-5P	S
BEECC255-08|Melissodes communis alopex|COI-5P	S
BEECC593-09|Melissodes communis alopex|COI-5P	S
BBHYA878-12|Melissodes communis|COI-5P	S
BEECC594-09|Melissodes communis alopex|COI-5P	S
GBMIN73411-17|Ceratina compacta|COI-5P|KY072439	S
GBAH11053-15|Ceratina compacta|COI-5P|KP259035	S
BBHYA1326-12|Anthophorula compactula|COI-5P	S
BBHYA523-12|Melissodes comptoides|COI-5P	S
BBHYA4117-12|Melissodes comptoides|COI-5P	S
BBHYA870-12|Melissodes comptoides|COI-5P	S
ASINH075-12|Eufriesea concava|COI-5P	S
GBAH6356-09|Eufriesea concava|COI-5P|EU421464	S
BUSA063-05|Triepeolus concavus|COI-5P	S
BEECC283-08|Florilegus condignus|COI-5P	S
BOFTW060-08|Florilegus condignus|COI-5P	S
GBMIN142741-18|Florilegus condignus|COI-5P|MG251039	S
GBAH4532-09|Xylocopa confusa|COI-5P|EU861304	S
FBHAP412-09|Nomada conjungens|COI-5P|KJ839300	S
FBHAP413-09|Nomada conjungens|COI-5P|KJ838788	S
FBAPB189-09|Nomada conjungens|COI-5P|HQ948022	S
FBAPC147-10|Nomada conjungens|COI-5P|KJ837916	S
FBAPB188-09|Nomada conjungens|COI-5P|HM401066	S
GBAH3251-07|Diadasia consociata|COI-5P|AF039092	S
GBAH3250-07|Diadasia consociata|COI-5P|AF039093	S
BBHYA938-12|Diadasia consociata|COI-5P	S
BBHYA939-12|Diadasia consociata|COI-5P	S
BBHYA975-12|Diadasia consociata|COI-5P	S
BBHYA2607-12|Diadasia consociata|COI-5P	S
DRBEE050-07|Euglossa cordata|COI-5P	S
DRBEE021-07|Euglossa cordata|COI-5P	S
GBAH6351-09|Euglossa cordata|COI-5P|EU421469	S
GBAH6270-09|Euglossa cordata|COI-5P|EU421550	S
GBAH1610-06|Euglossa cordata|COI-5P|AY920307	S
BEECC580-09|Eucera cordleyi|COI-5P	S
GBAH6326-09|Euglossa crassipunctata|COI-5P|EU421494	S
BEECA732-07|Neopasites cressoni|COI-5P	S
BEECB056-07|Nomada cressonii|COI-5P	S
HDBNS221-04|Nomada cressonii|COI-5P|FJ582348	S
HCBNS093-03|Nomada cressonii|COI-5P|FJ582349	S
JSHYM272-11|Nomada cressonii|COI-5P|KR798333	S
JSHYM466-11|Nomada cressonii|COI-5P|KR803740	S
HCBNS091-03|Nomada cressonii|COI-5P|FJ582350	S
HCBNS092-03|Nomada cressonii|COI-5P|FJ582351	S
DRBEE103-07|Euglossa crininota|COI-5P	S
GBAH6266-09|Euglossa crininota|COI-5P|EU421554	S
DRBEE012-07|Melipona crinita|COI-5P	S
FBAPC466-10|Epeolus cruciger|COI-5P|KJ836818	S
NOBEE071-09|Epeolus cruciger|COI-5P	S
GBACU2181-13|Epeolus cruciger|COI-5P|KJ839232	S
BCHYM396-13|Epeolus cruciger|COI-5P|KJ839532	S
NOBEE070-09|Epeolus cruciger|COI-5P	S
FBAPB526-09|Epeolus cruciger|COI-5P|KJ838146	S
BEEEE252-15|Epeolus cruciger|COI-5P	S
FBAPB523-09|Epeolus cruciger|COI-5P|HQ948059	S
GBACU2182-13|Epeolus cruciger|COI-5P|KJ839257	S
GBACU846-12|Epeolus cruciger|COI-5P|KJ839462	S
GBACU2180-13|Epeolus cruciger|COI-5P|KJ836474	S
FBAPB525-09|Epeolus cruciger|COI-5P|KJ839830	S
FBAPB524-09|Epeolus cruciger|COI-5P|KJ838365	S
BCHYM397-13|Epeolus cruciger|COI-5P|KJ837905	S
GBACU2179-13|Epeolus cruciger|COI-5P|KJ836924	S
JCLUC017-11|Bombus cryptarum|COI-5P|JN872571	S
JCLUC018-11|Bombus cryptarum|COI-5P|JN872570	S
JCLUC004-11|Bombus cryptarum|COI-5P|JN872584	S
JCLUC006-11|Bombus cryptarum|COI-5P|JN872582	S
JCLUC012-11|Bombus cryptarum|COI-5P|JN872576	S
JCLUC014-11|Bombus cryptarum|COI-5P|JN872574	S
JCLUC010-11|Bombus cryptarum|COI-5P|JN872578	S
JCLUC013-11|Bombus cryptarum|COI-5P|JN872575	S
JCLUC007-11|Bombus cryptarum|COI-5P|JN872581	S
JCLUC016-11|Bombus cryptarum|COI-5P|JN872572	S
JCLUC015-11|Bombus cryptarum|COI-5P|JN872573	S
JCLUC009-11|Bombus cryptarum|COI-5P|JN872579	S
JCLUC001-11|Bombus cryptarum|COI-5P|JN872587	S
JCLUC005-11|Bombus cryptarum|COI-5P|JN872583	S
JCLUC011-11|Bombus cryptarum|COI-5P|JN872577	S
JCLUC019-11|Bombus cryptarum|COI-5P|JN872569	S
JCLUC002-11|Bombus cryptarum|COI-5P|JN872586	S
JCLUC003-11|Bombus cryptarum|COI-5P|JN872585	S
JCLUC008-11|Bombus cryptarum|COI-5P|JN872580	S
JCLUC021-11|Bombus cryptarum|COI-5P|JN872567	S
JCLUC022-11|Bombus cryptarum|COI-5P|JN872566	S
JCLUC020-11|Bombus cryptarum|COI-5P|JN872568	S
GBHAP1389-15|Bombus cryptarum|COI-5P|LN714042	S
GBHAP1388-15|Bombus cryptarum|COI-5P|LN714043	S
GBHAP1390-15|Bombus cryptarum|COI-5P|LN714041	S
BBBO475-11|Bombus cryptarum|COI-5P|JQ843384	S
GBHAP299-14|Bombus cryptarum|COI-5P|KJ787691	S
TTHYW338-08|Bombus cryptarum|COI-5P|KR873600	S
BEECB612-07|Bombus cryptarum|COI-5P	S
BEECA806-07|Bombus cryptarum|COI-5P	S
BBWP546-10|Bombus cryptarum|COI-5P|JQ843389	S
BBBO054-10|Bombus cryptarum|COI-5P|JQ843386	S
BBBO052-10|Bombus cryptarum|COI-5P|JQ843415	S
BBBO025-10|Bombus cryptarum|COI-5P|JQ843407	S
BBBO022-10|Bombus cryptarum|COI-5P|JQ843404	S
BBBO247-10|Bombus cryptarum|COI-5P|JQ843403	S
BBBO240-10|Bombus cryptarum|COI-5P|JQ843396	S
BBBO053-10|Bombus cryptarum|COI-5P|JQ843387	S
BBBO056-10|Bombus cryptarum|COI-5P|JQ843416	S
BBBO048-10|Bombus cryptarum|COI-5P|JQ843414	S
BBBO047-10|Bombus cryptarum|COI-5P|JQ843388	S
BBBO023-10|Bombus cryptarum|COI-5P|JQ843405	S
BBBO239-10|Bombus cryptarum|COI-5P|JQ843395	S
BBBO250-10|Bombus cryptarum|COI-5P|JQ843413	S
BBBO251-10|Bombus cryptarum|COI-5P|JQ843373	S
BBWP547-10|Bombus cryptarum|COI-5P|JQ843390	S
BBBO039-10|Bombus cryptarum|COI-5P|JQ843410	S
BBBO040-10|Bombus cryptarum|COI-5P|JQ843411	S
BBBO041-10|Bombus cryptarum|COI-5P|JQ843412	S
BBBO038-10|Bombus cryptarum|COI-5P|JQ843409	S
BBBO358-10|Bombus cryptarum|COI-5P|JQ843382	S
BBBO362-10|Bombus cryptarum|COI-5P|JQ843417	S
BBBO359-10|Bombus cryptarum|COI-5P|JQ843374	S
BBBO361-10|Bombus cryptarum|COI-5P|JQ843377	S
BBBO344-10|Bombus cryptarum|COI-5P|JQ843371	S
BBBO360-10|Bombus cryptarum|COI-5P|JQ843381	S
BBBO428-11|Bombus cryptarum|COI-5P|JQ843399	S
BBBO427-11|Bombus cryptarum|COI-5P|JQ843400	S
BBBO149-10|Bombus cryptarum|COI-5P|JQ843392	S
BBBO150-10|Bombus cryptarum|COI-5P|JQ843398	S
BBBO063-10|Bombus cryptarum|COI-5P|JQ843376	S
BBBO073-10|Bombus cryptarum|COI-5P|JQ843378	S
BBBO075-10|Bombus cryptarum|COI-5P|JQ843380	S
BBBO062-10|Bombus cryptarum|COI-5P|JQ843375	S
BBBO074-10|Bombus cryptarum|COI-5P|JQ843379	S
BBBO037-10|Bombus cryptarum|COI-5P|JQ843408	S
BBBO308-10|Bombus cryptarum|COI-5P|JQ843372	S
BBBO061-10|Bombus cryptarum|COI-5P|JQ843418	S
BBBO467-11|Bombus cryptarum|COI-5P|JQ843394	S
FBAPD637-11|Bombus cryptarum|COI-5P|KJ838362	S
FBAPD636-11|Bombus cryptarum|COI-5P|KJ837278	S
FBAPD639-11|Bombus cryptarum|COI-5P|KJ837285	S
BBBO469-11|Bombus cryptarum|COI-5P|JQ843393	S
GBMIN71948-17|Bombus cryptarum|COI-5P|KP849482	S
BBBO473-11|Bombus cryptarum|COI-5P|JQ843385	S
BBBO472-11|Bombus cryptarum|COI-5P|JQ843391	S
FBAPD638-11|Bombus cryptarum|COI-5P|KJ837211	S
BBBO349-10|Bombus cryptarum|COI-5P|JQ843370	S
BBBO109-10|Bombus cryptarum|COI-5P|JQ843383	S
BBBO203-10|Bombus cryptarum|COI-5P|JQ843402	S
BBBO204-10|Bombus cryptarum|COI-5P|JQ843401	S
DIMC075-09|Bombus cryptarum|COI-5P|GU013572	S
BEECB607-07|Bombus cryptarum|COI-5P	S
GBAH0304-06|Bombus cryptarum|COI-5P|AF279485	S
GBAH0302-06|Bombus cryptarum|COI-5P|AF279483	S
GBAH0301-06|Bombus cryptarum|COI-5P|AF279482	S
GBAH0303-06|Bombus cryptarum|COI-5P|AF279484	S
GBAH3875-08|Bombus cryptarum|COI-5P|AY694096	S
GBAH1384-06|Bombus cryptarum|COI-5P|AY530012	S
GBAH1385-06|Bombus cryptarum|COI-5P|AY530013	S
GBAH1383-06|Bombus cryptarum|COI-5P|AY530011	S
GBAH10903-15|Bombus cryptarum|COI-5P|KJ668125	S
GBAH10907-15|Bombus cryptarum|COI-5P|KJ668129	S
GBAH10906-15|Bombus cryptarum|COI-5P|KJ668128	S
GBAH10904-15|Bombus cryptarum|COI-5P|KJ668126	S
GBAH10905-15|Bombus cryptarum|COI-5P|KJ668127	S
BEEEE117-15|Bombus cryptarum|COI-5P	S
BBBO024-10|Bombus cryptarum|COI-5P|JQ843406	S
BBBO465-11|Bombus cryptarum|COI-5P|JQ843397	S
GBAH0664-06|Bombus cryptarum|COI-5P|AY181100	S
GBAH0665-06|Bombus cryptarum|COI-5P|AY181101	S
BEECB086-07|Xylocopa cubaecola|COI-5P	S
DIAL214-06|Nomada cubensis|COI-5P	S
DIAL216-06|Nomada cubensis|COI-5P	S
FBAPD116-11|Ceratina cucurbitina|COI-5P|KJ836951	S
BCHYM425-13|Ceratina cucurbitina|COI-5P|KJ837021	S
FBAPC488-11|Ceratina cucurbitina|COI-5P|KJ839243	S
FBAPC489-11|Ceratina cucurbitina|COI-5P|KJ839224	S
FBAPC755-11|Ceratina cucurbitina|COI-5P|KJ836675	S
FBAPC754-11|Ceratina cucurbitina|COI-5P|KJ837836	S
FBAPC756-11|Ceratina cucurbitina|COI-5P|KJ838669	S
FBAPD117-11|Ceratina cucurbitina|COI-5P|KJ837449	S
FBAPC487-11|Ceratina cucurbitina|COI-5P|KJ837484	S
BCHYM428-13|Ceratina cucurbitina|COI-5P|KJ836657	S
FBAPC490-11|Ceratina cucurbitina|COI-5P|KJ839399	S
BCHYM427-13|Ceratina cucurbitina|COI-5P|KJ838050	S
BCHYM426-13|Ceratina cucurbitina|COI-5P|KJ839498	S
ABEE010-17|Ceratina cucurbitina|COI-5P	S
FBAPB474-09|Ceratina cucurbitina|COI-5P|KJ836874	S
FBAPC753-11|Ceratina cucurbitina|COI-5P|KJ837826	S
ABEE009-17|Ceratina cucurbitina|COI-5P	S
FBAPB476-09|Ceratina cucurbitina|COI-5P|KJ837996	S
BEECC340-08|Nomada cuneata|COI-5P	S
BEECC341-08|Nomada cuneata|COI-5P	S
BEECB794-07|Nomada cuneata|COI-5P	S
TTHYW097-08|Nomada cuneata|COI-5P|KR892254	S
SSROA347-14|Nomada cuneata|COI-5P|KR887667	S
GBMIN142766-18|Eucera curvitarsis|COI-5P|MG251064	S
DRBEE022-07|Euglossa cyanaspis|COI-5P	S
FBHAP176-09|Ceratina cyanea|COI-5P|KJ838036	S
FBAPD112-11|Ceratina cyanea|COI-5P|KJ838675	S
GBACU1236-12|Ceratina cyanea|COI-5P|KJ839401	S
FBAPD111-11|Ceratina cyanea|COI-5P|KJ838701	S
GBACU2297-13|Ceratina cyanea|COI-5P|KJ838047	S
ABEE012-17|Ceratina cyanea|COI-5P	S
FBAPD114-11|Ceratina cyanea|COI-5P|KJ839487	S
FBHAP193-09|Ceratina cyanea|COI-5P|GU705965	S
FBAPD113-11|Ceratina cyanea|COI-5P|KJ837744	S
FBHAP194-09|Ceratina cyanea|COI-5P|HM401435	S
GBACU2972-13|Ceratina cyanea|COI-5P|KJ839187	S
GBACU1063-12|Ceratina cyanea|COI-5P|KJ838912	S
GBACU1062-12|Ceratina cyanea|COI-5P|KJ837771	S
FBHAP192-09|Ceratina cyanea|COI-5P|HM401434	S
ABEE011-17|Ceratina cyanea|COI-5P	S
BCHYM429-13|Ceratina cyanea|COI-5P|KJ837445	S
BCHYM430-13|Ceratina cyanea|COI-5P|KJ838010	S
FBHAP191-09|Ceratina cyanea|COI-5P|KJ839775	S
BEEEE224-15|Ceratina cyanea|COI-5P	S
BEECA782-07|Ceratina cyaniventris|COI-5P	S
GBAH6339-09|Euglossa cyanura|COI-5P|EU421481	S
DRBEE072-07|Euglossa cyanura|COI-5P	S
ASINH209-12|Euglossa cybelia|COI-5P	S
ASINH211-12|Euglossa cybelia|COI-5P	S
ASINH210-12|Euglossa cybelia|COI-5P	S
ASINH215-12|Euglossa cybelia|COI-5P	S
DRBEE052-07|Euglossa cybelia|COI-5P	S
GBAH6306-09|Euglossa cybelia|COI-5P|EU421514	S
GBMIN142773-18|Eucera cypria|COI-5P|MG251071	S
BEECC656-09|Melissodes dagosa|COI-5P	S
BEECC654-09|Melissodes dagosa|COI-5P	S
BEECC655-09|Melissodes dagosa|COI-5P	S
BEECC657-09|Melissodes dagosa|COI-5P	S
GBAH6274-09|Euglossa deceptrix|COI-5P|EU421546	S
BEECA833-07|Centris decolorata|COI-5P	S
BEECA832-07|Centris decolorata|COI-5P	S
GBAH1611-06|Euglossa decorata|COI-5P|AY920308	S
GBAH6315-09|Euglossa decorata|COI-5P|EU421505	S
GBAH6316-09|Euglossa decorata|COI-5P|EU421504	S
GBAH0401-06|Bombus defector|COI-5P|AF385807	S
HDBNS110-03|Nomada dentariae|COI-5P|FJ582353	S
ASINH538-12|Exaerete dentata|COI-5P	S
GBAH6340-09|Exaerete dentata|COI-5P|EU421480	S
FBAPD711-11|Tetraloniella dentata|COI-5P|KJ838470	S
GBACU2092-13|Tetraloniella dentata|COI-5P|KJ839663	S
FBAPD880-11|Tetraloniella dentata|COI-5P|KJ839021	S
GBACU2093-13|Tetraloniella dentata|COI-5P|KJ836577	S
GBACU2091-13|Tetraloniella dentata|COI-5P|KJ837940	S
GBACU1160-12|Tetraloniella dentata|COI-5P|KJ838235	S
FBAPD870-11|Tetraloniella dentata|COI-5P|KJ837750	S
FBAPD869-11|Tetraloniella dentata|COI-5P|KJ838993	S
FBAPD867-11|Tetraloniella dentata|COI-5P|KJ837265	S
GBACU1161-12|Tetraloniella dentata|COI-5P|KJ839584	S
GBACU1425-12|Tetraloniella dentata|COI-5P|KJ837981	S
BUSA389-05|Nomada denticulata|COI-5P	S
UPOLB557-09|Nomada denticulata|COI-5P	S
SMTPB19923-13|Nomada denticulata|COI-5P|KR873735	S
UPOLB838-09|Nomada denticulata|COI-5P	S
UPOLB502-09|Nomada denticulata|COI-5P	S
UPOLB566-09|Nomada denticulata|COI-5P	S
UPOLB779-09|Nomada denticulata|COI-5P	S
MSAPB539-11|Ceratina dentipes|COI-5P	S
GBMIN73412-17|Ceratina dentipes|COI-5P|KU578048	S
BOFTH438-09|Ceratina dentipes|COI-5P	S
ASGCB221-13|Melissodes dentiventris|COI-5P	S
ASGCB222-13|Melissodes dentiventris|COI-5P	S
BBHYL400-10|Nomada depressa|COI-5P|JN293829	S
BBHYL403-10|Nomada depressa|COI-5P|JN293832	S
BBHEC095-09|Nomada depressa|COI-5P|GU690111	S
BEECC339-08|Nomada depressa|COI-5P	S
UPOLB762-09|Nomada depressa|COI-5P	S
BEECA565-06|Nomada depressa|COI-5P|FJ582352	S
HDBNS109-03|Nomada depressa|COI-5P|FJ582354	S
SMTPB19922-13|Nomada depressa|COI-5P|KR898478	S
BEECA460-06|Nomada depressa|COI-5P	S
HDBNS105-03|Nomada depressa|COI-5P|FJ582357	S
HDBNS104-03|Nomada depressa|COI-5P|FJ582356	S
HDBNS141-03|Nomada depressa|COI-5P|FJ582355	S
OBP037-05|Euglossa despecta|COI-5P	S
OBP032-05|Euglossa despecta|COI-5P	S
DRBEE079-07|Euglossa despecta|COI-5P	S
GBAH6252-09|Euglossa despecta|COI-5P|EU421568	S
HDBNS070-03|Melissodes desponsa|COI-5P|FJ582330	S
BEECA586-06|Melissodes desponsa|COI-5P	S
UPOLB194-09|Melissodes desponsa|COI-5P	S
UPOLB214-09|Melissodes desponsa|COI-5P	S
DIAL280-06|Melissodes desponsa|COI-5P	S
UPOLB226-09|Melissodes desponsa|COI-5P	S
HDBNS069-03|Melissodes desponsa|COI-5P|FJ582329	S
BEEMH111-06|Melissodes desponsa|COI-5P|MG440271	S
BEECA392-06|Melissodes desponsa|COI-5P	S
BEECA383-06|Melissodes desponsa|COI-5P	S
BEECA391-06|Melissodes desponsa|COI-5P	S
BEEMH125-06|Melissodes desponsa|COI-5P|MG441637	S
GBMIN142746-18|Melissodes desponsa|COI-5P|MG251044	S
GBMIN38951-13|Allodapula dichroa|COI-5P|HQ270144	S
BEECB1034-07|Diadasia diminuta|COI-5P	S
BEECB666-07|Diadasia diminuta|COI-5P	S
OBP041-05|Euglossa dissimula|COI-5P	S
OBP040-05|Euglossa dissimula|COI-5P	S
OBP042-05|Euglossa dissimula|COI-5P	S
OBP038-05|Euglossa dissimula|COI-5P	S
OBP039-05|Euglossa dissimula|COI-5P	S
OBP043-05|Euglossa dissimula|COI-5P	S
GBAH6290-09|Euglossa dissimula|COI-5P|EU421530	S
GBACU3511-13|Nomada distinguenda|COI-5P|KJ839387	S
GBACU3596-13|Nomada distinguenda|COI-5P|KJ838452	S
FBAPD744-11|Nomada distinguenda|COI-5P|KJ836592	S
GBACU3512-13|Nomada distinguenda|COI-5P|KJ837598	S
FBAPB193-09|Nomada distinguenda|COI-5P|HQ948026	S
FBAPB192-09|Nomada distinguenda|COI-5P|HQ948025	S
FBAPB191-09|Nomada distinguenda|COI-5P|HQ948024	S
FBAPB190-09|Nomada distinguenda|COI-5P|HQ948023	S
GBAH6336-09|Euglossa dodsoni|COI-5P|EU421484	S
ASINH234-12|Euglossa dodsoni|COI-5P	S
ASINH227-12|Euglossa dodsoni|COI-5P	S
DRBEE055-07|Euglossa dodsoni|COI-5P	S
ASINH235-12|Euglossa dodsoni|COI-5P	S
ASINH236-12|Euglossa dodsoni|COI-5P	S
ASINH226-12|Euglossa dodsoni|COI-5P	S
ASINH229-12|Euglossa dodsoni|COI-5P	S
ASINH228-12|Euglossa dodsoni|COI-5P	S
BEECA825-07|Centris DOM1|COI-5P	S
BEECA827-07|Centris DOM1|COI-5P	S
DIAL307-06|Triepeolus donatus|COI-5P	S
BOFTH435-09|Apis dorsata|COI-5P	S
MYENT102-17|Apis dorsata|COI-5P|MF804562	S
GBMIN71709-17|Apis dorsata|COI-5P|KU752355	S
MYENT006-17|Apis dorsata|COI-5P|MF804563	S
GBMIN71705-17|Apis dorsata|COI-5P|KU212344	S
GBMIN71706-17|Apis dorsata|COI-5P|KU212345	S
GBMIN71708-17|Apis dorsata|COI-5P|KY072607	S
GBMIN71701-17|Apis dorsata|COI-5P|KY072217	S
GBMIN71712-17|Apis dorsata|COI-5P|KY072184	S
GBMIN71707-17|Apis dorsata|COI-5P|KY072289	S
GBMIN71699-17|Apis dorsata|COI-5P|KY072272	S
GBMIN71702-17|Apis dorsata|COI-5P|KY072105	S
GBMIN71703-17|Apis dorsata|COI-5P|KY072090	S
GBMIN71700-17|Apis dorsata|COI-5P|KY072082	S
GBMIN71711-17|Apis dorsata|COI-5P|KY072446	S
GBMIN71704-17|Apis dorsata|COI-5P|KY072216	S
PMNHD1325-15|Apis dorsata|COI-5P|KY835209	S
GBAH0613-06|Apis dorsata|COI-5P|AY012725	S
GBAH1773-06|Apis dorsata|COI-5P|DQ016072	S
GBAH1776-06|Apis dorsata|COI-5P|DQ016075	S
GBAH1780-06|Apis dorsata|COI-5P|DQ016079	S
GBAH0287-06|Apis dorsata|COI-5P|AF153113	S
GBAH1778-06|Apis dorsata|COI-5P|DQ016077	S
GBAH0615-06|Apis dorsata|COI-5P|AY012727	S
GBAH1781-06|Apis dorsata|COI-5P|DQ016080	S
GBAH0286-06|Apis dorsata|COI-5P|AF153112	S
GBAH0612-06|Apis dorsata|COI-5P|AY012724	S
GBAH1775-06|Apis dorsata|COI-5P|DQ016074	S
GBAH1777-06|Apis dorsata|COI-5P|DQ016076	S
GBAH1779-06|Apis dorsata|COI-5P|DQ016078	S
GBAH1771-06|Apis dorsata|COI-5P|DQ016070	S
GBAH0614-06|Apis dorsata|COI-5P|AY012726	S
GBAH1774-06|Apis dorsata|COI-5P|DQ016073	S
GBAH5240-09|Apis dorsata|COI-5P|DQ020235	S
GBMNA18995-19|Apis dorsata|COI-5P|AP018369	S
GBMNA18563-19|Apis dorsata|COI-5P|NC_037709	S
GBAH6187-09|Apis dorsata|COI-5P|EU163107	S
GBMIN71710-17|Apis dorsata|COI-5P|KX998505	S
AGIRI285-17|Apis dorsata|COI-5P	S
GBHAP887-14|Apis dorsata|COI-5P|KJ513470	S
GBAH0559-06|Apis dorsata|COI-5P|AJ581104	S
GBAH5241-09|Apis dorsata|COI-5P|DQ020234	S
GBAH6268-09|Eufriesea dressleri|COI-5P|EU421552	S
GBAH6269-09|Euglossa dressleri|COI-5P|EU421551	S
BBHEC171-09|Melissodes druriella|COI-5P|GU690113	S
BBHEC170-09|Melissodes druriella|COI-5P|GU690116	S
BBHEC160-09|Melissodes druriella|COI-5P|GU690118	S
BBHEC167-09|Melissodes druriella|COI-5P|GU690115	S
BBHEC172-09|Melissodes druriella|COI-5P|GU690120	S
HGPPH034-10|Melissodes druriella|COI-5P|KR801296	S
BEECA588-06|Melissodes druriella|COI-5P	S
BBHEC173-09|Melissodes druriella|COI-5P|GU690117	S
DIAL304-06|Melissodes druriella|COI-5P	S
UPOLB229-09|Melissodes druriella|COI-5P	S
UPOLB164-09|Melissodes druriella|COI-5P	S
BBHEC568-09|Melissodes druriella|COI-5P|HM414250	S
BBHEC169-09|Melissodes druriella|COI-5P|GU690114	S
BBHEC166-09|Melissodes druriella|COI-5P|GU690159	S
BBHEC161-09|Melissodes druriella|COI-5P|GU690119	S
SMTPO4671-15|Melissodes druriella|COI-5P|MG440009	S
RBINA5029-13|Melissodes druriella|COI-5P|KR894169	S
CRHIB006-15|Melissodes druriella|COI-5P|MG442722	S
RBINA930-13|Melissodes druriella|COI-5P|KR894261	S
RBINA927-13|Melissodes druriella|COI-5P|KR893980	S
BEECA174-06|Melissodes druriella|COI-5P	S
BEECA175-06|Melissodes druriella|COI-5P	S
BEECC626-09|Melissodes druriella|COI-5P	S
GBMIN142745-18|Melissodes druriella|COI-5P|MG251043	S
GBHAP751-14|Amegilla dulcifera|COI-5P|AB851892	S
GBHAP752-14|Amegilla dulcifera|COI-5P|AB851891	S
ABBOL024-15|Amegilla dulcifera|COI-5P	S
ABBOL025-15|Amegilla dulcifera|COI-5P	S
ASGCB245-13|Ceratina dupla|COI-5P	S
BEECB998-07|Ceratina dupla|COI-5P|FJ582171	S
BEECB997-07|Ceratina dupla|COI-5P|FJ582172	S
BEECB1001-07|Ceratina dupla|COI-5P|FJ582169	S
ASGCB236-13|Ceratina dupla|COI-5P	S
UPOLB130-09|Ceratina dupla|COI-5P|JF271048	S
UPOLB010-09|Ceratina dupla|COI-5P	S
BEECB1000-07|Ceratina dupla|COI-5P|FJ582170	S
BUSA118-05|Ceratina dupla|COI-5P	S
HDBNS210-04|Ceratina dupla|COI-5P|FJ582174	S
HDBNS214-04|Ceratina dupla|COI-5P|FJ582173	S
UPOLC062-09|Ceratina dupla|COI-5P|JF271095	S
UPOLC016-09|Ceratina dupla|COI-5P|JF271094	S
UPOLC038-09|Ceratina dupla|COI-5P|JF271093	S
UPOLC059-09|Ceratina dupla|COI-5P|JF271097	S
UPOLC060-09|Ceratina dupla|COI-5P|JF271096	S
UPOLC053-09|Ceratina dupla|COI-5P|JF271092	S
BEECD170-09|Ceratina dupla|COI-5P|GU707483	S
BEECD162-09|Ceratina dupla|COI-5P|GU707491	S
BEECD180-09|Ceratina dupla|COI-5P|GU707476	S
BEECD163-09|Ceratina dupla|COI-5P|GU707492	S
BEECD177-09|Ceratina dupla|COI-5P|GU707473	S
BEECD183-09|Ceratina dupla|COI-5P|GU707471	S
BEECD169-09|Ceratina dupla|COI-5P|GU707482	S
UPOLB665-09|Ceratina dupla|COI-5P|JF271074	S
BEECD174-09|Ceratina dupla|COI-5P|GU707478	S
BEECD176-09|Ceratina dupla|COI-5P|GU707480	S
UPOLB438-09|Ceratina dupla|COI-5P|JF271086	S
UPOLB626-09|Ceratina dupla|COI-5P|JF271078	S
UPOLB180-09|Ceratina dupla|COI-5P|JF271088	S
UPOLB764-09|Ceratina dupla|COI-5P|JF271072	S
UPOLB636-09|Ceratina dupla|COI-5P|JF271076	S
BEECD175-09|Ceratina dupla|COI-5P|GU707479	S
UPOLL507-09|Ceratina dupla|COI-5P|JF271101	S
BEECD050-09|Ceratina dupla|COI-5P|GU707603	S
UPOLB435-09|Ceratina dupla|COI-5P|JF271087	S
BEECD057-09|Ceratina dupla|COI-5P|GU707594	S
UPOLB625-09|Ceratina dupla|COI-5P|JF271079	S
UPOLB122-09|Ceratina dupla|COI-5P|JF271090	S
BEECC482-08|Ceratina dupla|COI-5P|JF271068	S
BEECD039-09|Ceratina dupla|COI-5P|GU707608	S
UPOLB624-09|Ceratina dupla|COI-5P|JF271080	S
UPOLL799-09|Ceratina dupla|COI-5P|JF271100	S
BEECD003-09|Ceratina dupla|COI-5P|GU707645	S
UPOLB512-09|Ceratina dupla|COI-5P|JF271084	S
BEECD037-09|Ceratina dupla|COI-5P|GU707614	S
UPOLB594-09|Ceratina dupla|COI-5P|JF271081	S
UPOLB638-09|Ceratina dupla|COI-5P|JF271075	S
UPOLB765-09|Ceratina dupla|COI-5P|JF271071	S
UPOLB580-09|Ceratina dupla|COI-5P|JF271082	S
UPOLL890-09|Ceratina dupla|COI-5P|JF271098	S
UPOLB494-09|Ceratina dupla|COI-5P|JF271085	S
BEECD143-09|Ceratina dupla|COI-5P|GU707512	S
UPOLL800-09|Ceratina dupla|COI-5P|JF271099	S
UPOLB573-09|Ceratina dupla|COI-5P|JF271083	S
BEECD051-09|Ceratina dupla|COI-5P|GU707596	S
UPOLB144-09|Ceratina dupla|COI-5P|JF271089	S
BEECD056-09|Ceratina dupla|COI-5P|GU707593	S
UPOLB050-09|Ceratina dupla|COI-5P|JF271091	S
UPOLB763-09|Ceratina dupla|COI-5P|JF271073	S
BEECD058-09|Ceratina dupla|COI-5P|GU707595	S
BEECD038-09|Ceratina dupla|COI-5P|GU707615	S
UPOLB627-09|Ceratina dupla|COI-5P|JF271077	S
BEECD164-09|Ceratina dupla|COI-5P|GU707485	S
UPOLB766-09|Ceratina dupla|COI-5P|JF271070	S
BEECD182-09|Ceratina dupla|COI-5P|GU707470	S
BEECD181-09|Ceratina dupla|COI-5P|GU707469	S
BEECD161-09|Ceratina dupla|COI-5P|GU707490	S
BEECD179-09|Ceratina dupla|COI-5P|GU707475	S
BEECD167-09|Ceratina dupla|COI-5P|GU707488	S
BEECD168-09|Ceratina dupla|COI-5P|GU707481	S
BEECD178-09|Ceratina dupla|COI-5P|GU707474	S
BEECD160-09|Ceratina dupla|COI-5P|GU707489	S
GBMIN73414-17|Ceratina dupla|COI-5P|KP747213	S
GBMIN73418-17|Ceratina dupla|COI-5P|KP747211	S
GBMIN73434-17|Ceratina dupla|COI-5P|KP747219	S
GBMIN73436-17|Ceratina dupla|COI-5P|KP747224	S
GBMIN73424-17|Ceratina dupla|COI-5P|KP747188	S
GBMIN73435-17|Ceratina dupla|COI-5P|KP747215	S
GBMIN73422-17|Ceratina dupla|COI-5P|KP747187	S
GBMIN73430-17|Ceratina dupla|COI-5P|KP747220	S
GBMIN73438-17|Ceratina dupla|COI-5P|KP747223	S
GBMIN73437-17|Ceratina dupla|COI-5P|KP747221	S
GBMIN73421-17|Ceratina dupla|COI-5P|KP747197	S
GBMIN73415-17|Ceratina dupla|COI-5P|KP747198	S
GBMIN73413-17|Ceratina dupla|COI-5P|KP747204	S
GBMIN73416-17|Ceratina dupla|COI-5P|KP747210	S
GBMIN73417-17|Ceratina dupla|COI-5P|KP747208	S
GBMIN73433-17|Ceratina dupla|COI-5P|KP747222	S
GBMIN73439-17|Ceratina dupla|COI-5P|KP747216	S
GBMIN73431-17|Ceratina dupla|COI-5P|KP747217	S
GBMIN73426-17|Ceratina dupla|COI-5P|KP747202	S
GBMIN73432-17|Ceratina dupla|COI-5P|KP747218	S
GBMIN73428-17|Ceratina dupla|COI-5P|KP747192	S
GBMIN73429-17|Ceratina dupla|COI-5P|KP747196	S
GBMIN73427-17|Ceratina dupla|COI-5P|KP747195	S
GBMIN73423-17|Ceratina dupla|COI-5P|KP747203	S
GBMIN73419-17|Ceratina dupla|COI-5P|KP747206	S
GBMIN73420-17|Ceratina dupla|COI-5P|KP747207	S
GBMIN73425-17|Ceratina dupla|COI-5P|KP747200	S
UPOLB748-09|Ceratina dupla|COI-5P	S
GBHAP161-13|Braunsapis elizabethana|COI-5P|KC351812	S
GBAH2306-07|Macrogalea ellioti|COI-5P|EF103589	S
GBAH5179-09|Macrogalea ellioti|COI-5P|EF103590	S
GBAH1906-06|Brevineura elongata|COI-5P|DQ149673	S
FBAPB194-09|Nomada emarginata|COI-5P|KJ838576	S
FBAPB195-09|Nomada emarginata|COI-5P|KJ838593	S
FBAPD713-11|Nomada emarginata|COI-5P|KJ836575	S
FBAPC984-11|Biastes emarginatus|COI-5P|KJ839184	S
GBAH1894-06|Allodapula empeyi|COI-5P|DQ149659	S
GBAH3242-07|Diadasia enavata|COI-5P|AF039101	S
BEECB577-07|Diadasia enavata|COI-5P	S
GBAH1901-06|Exoneurella eremophila|COI-5P|DQ149667	S
BUSA064-05|Tetraloniella eriocarpi|COI-5P	S
LASNA543-08|Xylocopa erythrina|COI-5P	S
LASNA638-08|Xylocopa erythrina|COI-5P	S
DRBEE186-07|Euglossa erythrochlora|COI-5P	S
GBAH1612-06|Euglossa erythrochlora|COI-5P|AY920309	S
GBAH6272-09|Euglossa erythrochlora|COI-5P|EU421548	S
GBAH1903-06|Inquilina excavata|COI-5P|DQ149669	S
GBHAP816-14|Bombus excellens|COI-5P|KC853321	S
BEECB772-07|Anthophora exigua|COI-5P	S
BEECB734-07|Anthophora exigua|COI-5P	S
GBHAP167-13|Allodape exoloma|COI-5P|KC351806	S
BOFWM094-08|Syntrichalonia exquisita|COI-5P	S
GMGMG296-14|Nomada fabriciana|COI-5P	S
GMGMG503-14|Nomada fabriciana|COI-5P	S
GMGMK1094-14|Nomada fabriciana|COI-5P	S
BEEEE328-16|Nomada fabriciana|COI-5P	S
BEEEE203-15|Nomada fabriciana|COI-5P	S
BEEEE063-15|Nomada fabriciana|COI-5P|KT074066	S
FBAPC159-10|Nomada fabriciana|COI-5P|KJ838946	S
FBAPD188-11|Nomada fabriciana|COI-5P|KJ838459	S
FBAPB197-09|Nomada fabriciana|COI-5P|HM401067	S
ABEE071-17|Nomada fabriciana|COI-5P	S
FBHAP415-09|Nomada fabriciana|COI-5P|GU706016	S
FBAPC160-10|Nomada fabriciana|COI-5P|KJ837286	S
ABEE070-17|Nomada fabriciana|COI-5P	S
FBAPD189-11|Nomada fabriciana|COI-5P|KJ837742	S
GMGMA446-14|Nomada fabriciana|COI-5P	S
IBBP152-10|Nomada fabriciana|COI-5P|JQ909796	S
IBBP151-10|Nomada fabriciana|COI-5P|JQ909795	S
FBHAP414-09|Nomada fabriciana|COI-5P|KJ836694	S
FBHAP416-09|Nomada fabriciana|COI-5P|KJ836939	S
FBAPB199-09|Nomada facilis|COI-5P|HM401068	S
FBAPC121-10|Nomada facilis|COI-5P|KJ837786	S
FBAPB200-09|Nomada facilis|COI-5P|HM401069	S
FBAPB198-09|Nomada facilis|COI-5P|HQ948027	S
BEECA828-07|Centris fasciata|COI-5P	S
FBAPB203-09|Nomada femoralis|COI-5P|HM401071	S
FBAPB202-09|Nomada femoralis|COI-5P|HM401070	S
GBACU1651-12|Nomada femoralis|COI-5P|KJ837198	S
FBAPD218-11|Nomada ferruginata|COI-5P|KJ839795	S
FBAPC514-11|Nomada ferruginata|COI-5P|KJ838110	S
FBAPD760-11|Nomada ferruginata|COI-5P|KJ837859	S
FBAPD217-11|Nomada ferruginata|COI-5P|KJ836584	S
FBAPD759-11|Nomada ferruginata|COI-5P|KJ837809	S
FBHAP417-09|Nomada ferruginata|COI-5P|GU706017	S
FBAPB206-09|Nomada ferruginata|COI-5P|KJ838194	S
FBHAP418-09|Nomada ferruginata|COI-5P|KJ836909	S
BOFTW165-08|Peponapis fervens|COI-5P	S
GBHAP034-13|Nomada fervida|COI-5P|HQ204773	S
GBHAP038-13|Nomada fervida|COI-5P|HQ204769	S
CNPPF1227-12|Nomada fervida|COI-5P|KJ165170	S
GBHAP037-13|Nomada fervida|COI-5P|HQ204770	S
GBHAP039-13|Nomada fervida|COI-5P|HQ204768	S
GBHAP036-13|Nomada fervida|COI-5P|HQ204771	S
GBHAP035-13|Nomada fervida|COI-5P|HQ204772	S
BOFTW175-08|Alepidosceles filitarsis|COI-5P	S
BOFWM213-08|Xylocopa fimbriata|COI-5P	S
ASINH251-12|Euglossa flammea|COI-5P	S
ASINH252-12|Euglossa flammea|COI-5P	S
ASINH246-12|Euglossa flammea|COI-5P	S
ASINH247-12|Euglossa flammea|COI-5P	S
DRBEE174-07|Euglossa flammea|COI-5P	S
GBAH6338-09|Euglossa flammea|COI-5P|EU421482	S
GBAH6331-09|Euglossa flammea|COI-5P|EU421489	S
FBHAP420-09|Nomada flava|COI-5P|GU706019	S
FBHAP422-09|Nomada flava|COI-5P|GU706020	S
FBAPD182-11|Nomada flava|COI-5P|KJ839779	S
FBHAP449-09|Nomada flava|COI-5P|GU706040	S
FBAPD183-11|Nomada flava|COI-5P|KJ837209	S
GBACU2022-12|Nomada flava|COI-5P|KJ837963	S
FBHAP421-09|Nomada flava|COI-5P|GU706018	S
FBAPC157-10|Nomada flava|COI-5P|KJ839107	S
BEEEE064-15|Nomada flava|COI-5P|KT074067	S
BEEEE270-16|Nomada flava|COI-5P	S
BEEEE170-15|Nomada flava|COI-5P	S
FBHAP419-09|Nomada flava|COI-5P|KJ839681	S
BEEEE349-16|Nomada flava|COI-5P	S
GBACU838-12|Nomada flava_spec1CSE|COI-5P|KJ839508	S
GBACU836-12|Nomada flava_spec1CSE|COI-5P|KJ839276	S
GBACU835-12|Nomada flava_spec1CSE|COI-5P|KJ836752	S
GBACU837-12|Nomada flava_spec1CSE|COI-5P|KJ838462	S
BOWGF031-08|Xylocopa flavicollis|COI-5P	S
GBHAP750-14|Xylocopa flavifrons|COI-5P|AB969813	S
GBAH4546-09|Xylocopa flavifrons|COI-5P|EU861290	S
GBAH4548-09|Xylocopa flavifrons|COI-5P|EU861288	S
GBAH4549-09|Xylocopa flavifrons|COI-5P|EU861287	S
GBAH4547-09|Xylocopa flavifrons|COI-5P|EU861289	S
GBAH4545-09|Xylocopa flavifrons|COI-5P|EU861291	S
GBAH4550-09|Xylocopa flavifrons|COI-5P|EU861286	S
GBAH0564-06|Eufriesea flaviventris|COI-5P|AJ581109	S
FBHAP423-09|Nomada flavoguttata|COI-5P|HM376220	S
GBACU831-12|Nomada flavoguttata|COI-5P|KJ836522	S
GBACU2027-12|Nomada flavoguttata|COI-5P|KJ838302	S
GBACU832-12|Nomada flavoguttata|COI-5P|KJ837849	S
GBACU2023-12|Nomada flavoguttata|COI-5P|KJ838748	S
GBACU2026-12|Nomada flavoguttata|COI-5P|KJ839657	S
GBACU2025-12|Nomada flavoguttata|COI-5P|KJ837714	S
FBAPC135-10|Nomada flavoguttata|COI-5P|KJ836666	S
FBAPD190-11|Nomada flavoguttata|COI-5P|KJ836520	S
FBAPC136-10|Nomada flavoguttata|COI-5P|KJ839389	S
GBACU827-12|Nomada flavoguttata|COI-5P|KJ838045	S
GBACU347-12|Nomada flavoguttata|COI-5P|KJ836734	S
GMGRD3460-13|Nomada flavoguttata|COI-5P	S
GBACU346-12|Nomada flavoguttata|COI-5P|KJ839601	S
GBACU830-12|Nomada flavoguttata|COI-5P|KJ838570	S
FBAPC137-10|Nomada flavoguttata|COI-5P|KJ836513	S
GBACU829-12|Nomada flavoguttata|COI-5P|KJ837260	S
GBACU833-12|Nomada flavoguttata|COI-5P|KJ839193	S
[truncated: 9,348 more rows]

## Sheet: Megachilidae BOLD Position 153
BOLD Sample	COI Position 153
LIN437-07|Hoplitis producta|COI-5P|EU566847	A
SCRAP009-14|Othinosmia schultzei|COI-5P	A
AUSBS045-12|Megachile sp. RLCR6|COI-5P	A
GBMIN78098-17|Megachile sp. JAW-2015|COI-5P|KT123234	A
BEECA823-07|Coelioxys abdominalis|COI-5P	S
FBAPB663-09|Hoplitis acuticornis|COI-5P|HQ948074	S
FBAPC377-10|Hoplitis acuticornis|COI-5P|KJ836617	S
FBAPB662-09|Hoplitis acuticornis|COI-5P|HM401195	S
FBAPC664-11|Hoplitis acuticornis|COI-5P|KJ839214	S
FBAPB660-09|Hoplitis acuticornis|COI-5P|HQ948073	S
FBAPC378-10|Hoplitis acuticornis|COI-5P|KJ837933	S
ABEE187-17|Hoplitis acuticornis|COI-5P	S
GBMIN13945-13|Hoplitis acuticornis|COI-5P|JQ677475	S
BEECC392-08|Megachile addenda|COI-5P	S
BEECC390-08|Megachile addenda|COI-5P	S
BEECC391-08|Megachile addenda|COI-5P	S
BEECA119-06|Megachile addenda|COI-5P	S
BEECB831-07|Megachile adelphodonta|COI-5P	S
ABEE031-17|Hoplitis adunca|COI-5P	S
ABEE032-17|Hoplitis adunca|COI-5P	S
FBHAP286-09|Hoplitis adunca|COI-5P|KJ839026	S
FBHAP288-09|Hoplitis adunca|COI-5P|GU705977	S
FBAPB664-09|Hoplitis adunca|COI-5P|HM401196	S
BCHYM1495-13|Hoplitis adunca|COI-5P|KJ837699	S
GBACU1143-12|Hoplitis adunca|COI-5P|KJ837077	S
FBAPC533-11|Hoplitis adunca|COI-5P|KJ839331	S
GBCHA1064-13|Hoplitis adunca|COI-5P|KJ838051	S
GMGMJ954-14|Hoplitis adunca|COI-5P	S
BEEEE352-16|Hoplitis adunca|COI-5P	S
FBHAP287-09|Hoplitis adunca|COI-5P|KJ837518	S
GBMIN13928-13|Hoplitis adunca|COI-5P|JQ677527	S
GBAH4627-09|Hoplitis adunca|COI-5P|EU863059	S
BEECB399-07|Osmia aff ribifloris|COI-5P	S
BOFTW056-08|Coelioxys aff. Totonaca|COI-5P	S
BEECC770-09|Dioxys aff. pomonae|COI-5P	S
BEECC773-09|Dioxys aff. pomonae|COI-5P	S
BEECC771-09|Dioxys aff. pomonae|COI-5P	S
FBAPC790-11|Coelioxys afra|COI-5P|KJ837520	S
FBAPC789-11|Coelioxys afra|COI-5P|KJ836637	S
FBAPC351-10|Coelioxys afra|COI-5P|KJ836720	S
FBAPC788-11|Coelioxys afra|COI-5P|KJ836849	S
FBAPC350-10|Coelioxys afra|COI-5P|KJ836648	S
FBAPC772-11|Coelioxys afra|COI-5P|KJ839415	S
FBAPC771-11|Coelioxys afra|COI-5P|KJ837838	S
FBAPC773-11|Coelioxys afra|COI-5P|KJ837941	S
FBAPC774-11|Coelioxys afra|COI-5P|KJ838705	S
FBAPC599-11|Coelioxys afra|COI-5P|KJ836739	S
FBAPD368-11|Coelioxys afra|COI-5P|KJ838888	S
ABEE013-17|Coelioxys afra|COI-5P	S
FBAPC352-10|Coelioxys afra|COI-5P|KJ837232	S
FBAPB481-09|Coelioxys afra|COI-5P|KJ837143	S
FBAPB483-09|Coelioxys afra|COI-5P|KJ837892	S
FBAPC787-11|Coelioxys afra|COI-5P|KJ837929	S
FBHAP367-09|Coelioxys afra|COI-5P|KJ837993	S
FBACB690-11|Coelioxys afra|COI-5P|KJ838069	S
GBACU1272-12|Coelioxys afra|COI-5P|KJ838698	S
BCHYM446-13|Coelioxys afra|COI-5P|KJ838027	S
ABEE222-17|Coelioxys afra|COI-5P	S
BEECC978-09|Osmia aglaia|COI-5P	S
BEECB441-07|Osmia aglaia|COI-5P	S
BEECB810-07|Megachile agustini|COI-5P	S
BEECB695-07|Megachile agustini|COI-5P	S
BEECB697-07|Megachile agustini|COI-5P	S
BEECB808-07|Megachile agustini|COI-5P	S
BUSA047-05|Megachile agustini|COI-5P	S
ABBOL056-15|Megachile ainu|COI-5P	S
ABBOL057-15|Megachile ainu|COI-5P	S
ABBOL058-15|Megachile ainu|COI-5P	S
FBAPC781-11|Coelioxys alata|COI-5P|KJ839560	S
FBAPB856-09|Coelioxys alata|COI-5P|HM401246	S
FBAPC780-11|Coelioxys alata|COI-5P|KJ838887	S
FBAPC764-11|Coelioxys alata|COI-5P|KJ839470	S
BBHYL380-10|Hoplitis albifrons|COI-5P|JN293814	S
TTHYW561-08|Hoplitis albifrons argentifrons|COI-5P|KM569588	S
TTHYW433-08|Hoplitis albifrons argentifrons|COI-5P|KM566538	S
BEECB665-07|Hoplitis albifrons argentifrons|COI-5P	S
BBHYL383-10|Hoplitis albifrons|COI-5P|JN293816	S
TTHYW439-08|Hoplitis albifrons argentifrons|COI-5P|KM556798	S
BEECB333-07|Hoplitis albifrons|COI-5P	S
BEECB331-07|Hoplitis albifrons|COI-5P	S
BEECB332-07|Hoplitis albifrons|COI-5P	S
BEECB580-07|Hoplitis albifrons|COI-5P	S
NGNAD1562-13|Hoplitis albifrons|COI-5P|KR901390	S
BEECB334-07|Hoplitis albifrons|COI-5P	S
BEECA528-06|Hoplitis albifrons|COI-5P	S
BEECA170-06|Hoplitis albifrons|COI-5P	S
BEECA065-06|Hoplitis albifrons|COI-5P	S
BEECA171-06|Hoplitis albifrons|COI-5P	S
BEECA064-06|Hoplitis albifrons|COI-5P	S
BEECA066-06|Hoplitis albifrons|COI-5P	S
BEECA022-06|Hoplitis albifrons|COI-5P	S
HMBCH034-07|Hoplitis albifrons|COI-5P|JX831902	S
BBHYA3891-12|Hoplitis albifrons|COI-5P	S
NGNAF075-13|Hoplitis albifrons|COI-5P|KR877366	S
GBACU326-12|Megachile albisecta|COI-5P|KJ839743	S
BBHYA893-12|Megachile albitarsis|COI-5P	S
BBHYA521-12|Megachile albitarsis|COI-5P	S
BBHYA522-12|Megachile albitarsis|COI-5P	S
JSHYM437-11|Osmia albiventris|COI-5P|KR792997	S
BEECA125-06|Osmia albiventris|COI-5P	S
BEECC281-08|Osmia albiventris|COI-5P	S
BEECC282-08|Osmia albiventris|COI-5P	S
BEECA598-06|Osmia albiventris|COI-5P	S
BEECA499-06|Osmia albiventris|COI-5P	S
BEECA501-06|Osmia albiventris|COI-5P	S
BEECA502-06|Osmia albiventris|COI-5P	S
BEECB369-07|Osmia albolateralis|COI-5P	S
BEECA961-07|Osmia albolateralis|COI-5P	S
BEECB370-07|Osmia albolateralis|COI-5P	S
HYQTB277-12|Coelioxys albolineata|COI-5P	S
HYQTB181-12|Coelioxys albolineata|COI-5P	S
MSAPB112-11|Megachile albomarginata|COI-5P	S
MSAPB115-11|Megachile albomarginata|COI-5P	S
MSAPB116-11|Megachile albomarginata|COI-5P	S
MSAPB166-11|Megachile albomarginata|COI-5P	S
MSAPB110-11|Megachile albomarginata|COI-5P	S
MSAPB167-11|Megachile albomarginata|COI-5P	S
MSAPB111-11|Megachile albomarginata|COI-5P	S
MSAPB114-11|Megachile albomarginata|COI-5P	S
MSAPB106-11|Megachile albomarginata|COI-5P	S
MSAPB113-11|Megachile albomarginata|COI-5P	S
LASNA766-08|Heriades aldabranus|COI-5P	S
LASNA672-08|Heriades aldabranus|COI-5P	S
BOFWM072-08|Osmia aliciae|COI-5P	S
BEECC869-09|Osmia alpestris|COI-5P	S
BEECC870-09|Osmia alpestris|COI-5P	S
FBAPB629-09|Megachile alpicola|COI-5P|KJ837328	S
FBAPB627-09|Megachile alpicola|COI-5P|KJ837017	S
FBAPD499-11|Megachile alpicola|COI-5P|KJ836530	S
FBAPD498-11|Megachile alpicola|COI-5P|KJ837737	S
FBAPD500-11|Megachile alpicola|COI-5P|KJ838895	S
GBACU2327-13|Megachile alpicola|COI-5P|KJ838910	S
BEECA530-06|Coelioxys alternata|COI-5P	S
GBCHA1068-13|Osmia alticola|COI-5P|KJ839450	S
BCHYM1505-13|Megachile analis|COI-5P|KJ836613	S
FBAPB631-09|Megachile analis|COI-5P|HQ948065	S
BCHYM1504-13|Megachile analis|COI-5P|KJ837255	S
FBAPB630-09|Megachile analis|COI-5P|HM401190	S
FBAPB632-09|Megachile analis|COI-5P|HM401191	S
FBAPB633-09|Megachile analis|COI-5P|KJ839240	S
BEECC1176-09|Osmia anasazi|COI-5P	S
BEECB452-07|Osmia anasazi|COI-5P	S
BEECC1175-09|Osmia anasazi|COI-5P	S
BEECB451-07|Osmia anasazi|COI-5P	S
ABEE116-17|Osmia andrenoides|COI-5P	S
ABEE185-17|Osmia andrenoides|COI-5P	S
FBAPC358-10|Osmia andrenoides|COI-5P|KJ838859	S
FBAPB666-09|Osmia andrenoides|COI-5P|HM401197	S
FBAPB667-09|Osmia andrenoides|COI-5P|HM401198	S
FBAPC734-11|Osmia andrenoides|COI-5P|KJ839211	S
GBCHA1065-13|Osmia andrenoides|COI-5P|KJ837047	S
FBAPD120-11|Osmia andrenoides|COI-5P|KJ839406	S
FBAPC733-11|Osmia andrenoides|COI-5P|KJ837877	S
FBAPB665-09|Osmia andrenoides|COI-5P|KJ837879	S
BEECB557-07|Megachile angelarum|COI-5P	S
DLII1038-07|Megachile angustistriata|COI-5P	S
GBMIN13977-13|Hoplitis annulata|COI-5P|JQ677486	S
BEECC1166-09|Megachile anograe|COI-5P	S
BEECC1164-09|Megachile anograe|COI-5P	S
BEECB1012-07|Megachile anograe|COI-5P	S
BEECC1165-09|Megachile anograe|COI-5P	S
BEECB809-07|Megachile anograe|COI-5P	S
FBAPC877-11|Hoplitis anthocopoides|COI-5P|KJ838395	S
ABEE033-17|Hoplitis anthocopoides|COI-5P	S
ABEE210-17|Hoplitis anthocopoides|COI-5P	S
UPOLL136-09|Hoplitis anthocopoides|COI-5P	S
FBACB684-11|Hoplitis anthocopoides|COI-5P|KJ838067	S
FBAPC878-11|Hoplitis anthocopoides|COI-5P|KJ839674	S
UPOLB791-09|Hoplitis anthocopoides|COI-5P	S
UPOLB633-09|Hoplitis anthocopoides|COI-5P	S
UPOLB844-09|Hoplitis anthocopoides|COI-5P	S
FBAPC879-11|Hoplitis anthocopoides|COI-5P|KJ839382	S
UPOLB657-09|Hoplitis anthocopoides|COI-5P	S
BUSA210-05|Hoplitis anthocopoides|COI-5P	S
FBAPC535-11|Hoplitis anthocopoides|COI-5P|KJ839105	S
FBAPC951-11|Hoplitis anthocopoides|COI-5P|KJ839133	S
FBAPC952-11|Hoplitis anthocopoides|COI-5P|KJ839554	S
FBAPC954-11|Hoplitis anthocopoides|COI-5P|KJ839325	S
UPOLL135-09|Hoplitis anthocopoides|COI-5P	S
UPOLL148-09|Hoplitis anthocopoides|COI-5P	S
FBAPB670-09|Hoplitis anthocopoides|COI-5P|HM401199	S
UPOLL027-09|Hoplitis anthocopoides|COI-5P	S
UPOLL020-09|Hoplitis anthocopoides|COI-5P	S
FBAPC953-11|Hoplitis anthocopoides|COI-5P|KJ838795	S
TTHYW837-08|Hoplitis anthocopoides|COI-5P|KR926314	S
FBAPC661-11|Hoplitis anthocopoides|COI-5P|KJ838649	S
GBMIN13962-13|Hoplitis anthocopoides|COI-5P|JQ677528	S
FBAPC880-11|Hoplitis anthocopoides_csea|COI-5P|KJ836596	S
GBAH9155-14|Megachile anthracina|COI-5P|KF861940	S
ABEE049-17|Megachile apicalis|COI-5P	S
FBAPC744-11|Megachile apicalis|COI-5P|KJ837288	S
FBAPC746-11|Megachile apicalis|COI-5P|KJ837589	S
FBAPC747-11|Megachile apicalis|COI-5P|KJ839086	S
BEECB812-07|Megachile apicalis|COI-5P	S
ABEE215-17|Megachile apicalis|COI-5P	S
BBHYA2217-12|Megachile apicalis|COI-5P	S
BEECB1019-07|Megachile apicalis|COI-5P	S
FBAPB635-09|Megachile apicalis|COI-5P|KJ837899	S
ABEE048-17|Megachile apicalis|COI-5P	S
BEECA475-06|Megachile apicalis|COI-5P	S
JSYKA166-10|Osmia aquilonaria|COI-5P|HM860338	S
LASNA574-08|Anthodioctes ARG01|COI-5P	S
LASNA479-08|Anthodioctes ARG01|COI-5P	S
LASNA491-08|Megachile ARG02|COI-5P	S
LASNA586-08|Megachile ARG02|COI-5P	S
LASNA587-08|Megachile ARG1|COI-5P	S
LASNA492-08|Megachile ARG1|COI-5P	S
BOFTW077-08|Megachile ARG1|COI-5P	S
GBGST083-13|Coelioxys argentea|COI-5P|KJ837998	S
BBHYA2330-12|Ashmeadiella aridula|COI-5P	S
BBHYA1221-12|Ashmeadiella aridula|COI-5P	S
BBHYA1684-12|Ashmeadiella aridula|COI-5P	S
ABBOL070-15|Megachile asahinai|COI-5P	S
ABBOL071-15|Megachile asahinai|COI-5P	S
BOFTW012-08|Coelioxys assumptionis|COI-5P	S
ASGCB261-13|Osmia atriventris|COI-5P	S
BBHEC461-09|Osmia atriventris|COI-5P|HM414167	S
ASGCB257-13|Osmia atriventris|COI-5P	S
BEECA595-06|Osmia atriventris|COI-5P	S
BEECC276-08|Osmia atriventris|COI-5P	S
BBHYL362-10|Osmia atriventris|COI-5P|JN293800	S
PHMTX155-11|Osmia atriventris|COI-5P|KR873596	S
UPOLB612-09|Osmia atriventris|COI-5P	S
UPOLB656-09|Osmia atriventris|COI-5P	S
ASGCB253-13|Osmia atriventris|COI-5P	S
TTHYW392-08|Osmia atriventris|COI-5P|KM563584	S
HDBNS082-03|Osmia atriventris|COI-5P|FJ582416	S
HCBNS172-03|Osmia atriventris|COI-5P|FJ582411	S
HCBNS173-03|Osmia atriventris|COI-5P|FJ582412	S
HPPPD1732-13|Osmia atriventris|COI-5P|KR788418	S
SMTPL2697-15|Osmia atriventris|COI-5P|MG355137	S
BEECA504-06|Osmia atriventris|COI-5P	S
HDBNS083-03|Osmia atriventris|COI-5P|FJ582413	S
HDBNS085-03|Osmia atriventris|COI-5P|FJ582414	S
HDBNS084-03|Osmia atriventris|COI-5P|FJ582415	S
BEECC1177-09|Osmia atrocyanea|COI-5P	S
BEECC258-08|Osmia atrocyanea|COI-5P	S
BEECC256-08|Osmia atrocyanea|COI-5P	S
GBAH4613-09|Chelostoma aureocinctum|COI-5P|EU863073	S
GBMIN78083-17|Chelostoma aureocinctum|COI-5P|KY072562	S
GBMIN143425-18|Megachile aurifrons|COI-5P|KX580380	S
AUSCL2303-12|Megachile aurifrons|COI-5P	S
FBAPC794-11|Coelioxys aurolimbata|COI-5P|KJ838528	S
FBAPC762-11|Coelioxys aurolimbata|COI-5P|KJ836870	S
FBAPC791-11|Coelioxys aurolimbata|COI-5P|KJ836595	S
FBAPC792-11|Coelioxys aurolimbata|COI-5P|KJ839452	S
FBAPC761-11|Coelioxys aurolimbata|COI-5P|KJ837994	S
FBAPC793-11|Coelioxys aurolimbata|COI-5P|KJ836665	S
FBAPC796-11|Coelioxys aurolimbata|COI-5P|KJ839416	S
GBMIN143365-18|Coelioxys aurolimbata|COI-5P|KX580320	S
ABEE014-17|Coelioxys aurolimbata|COI-5P	S
FBAPC600-11|Coelioxys aurolimbata|COI-5P|KJ838074	S
FBHAP579-09|Coelioxys aurolimbata|COI-5P|KJ838138	S
FBAPC798-11|Coelioxys aurolimbata|COI-5P|KJ839445	S
FBAPD122-11|Osmia aurulenta|COI-5P|KJ836547	S
GBACU1209-12|Osmia aurulenta|COI-5P|KJ838232	S
GBACU1208-12|Osmia aurulenta|COI-5P|KJ837125	S
GBACU1207-12|Osmia aurulenta|COI-5P|KJ837377	S
GBACU1210-12|Osmia aurulenta|COI-5P|KJ839495	S
GBCHA1067-13|Osmia aurulenta|COI-5P|KJ838559	S
GBACU3703-13|Osmia aurulenta|COI-5P|KJ837405	S
FBAPD121-11|Osmia aurulenta|COI-5P|KJ838816	S
FBAPD123-11|Osmia aurulenta|COI-5P|KJ838385	S
FBAPC728-11|Osmia aurulenta|COI-5P|KJ837860	S
FBAPC729-11|Osmia aurulenta|COI-5P|KJ837205	S
GBACU1206-12|Osmia aurulenta|COI-5P|KJ837957	S
GBACU1204-12|Osmia aurulenta|COI-5P|KJ837213	S
GBACU1205-12|Osmia aurulenta|COI-5P|KJ837883	S
FBAPC372-10|Osmia aurulenta|COI-5P|KJ837026	S
FBAPD124-11|Osmia aurulenta|COI-5P|KJ838278	S
FBHAP291-09|Osmia aurulenta|COI-5P|HM376213	S
IBBP204-10|Osmia aurulenta|COI-5P|JQ909848	S
FBAPC371-10|Osmia aurulenta|COI-5P|KJ839460	S
FBAPD375-11|Osmia aurulenta|COI-5P|KJ838992	S
FBAPD376-11|Osmia aurulenta|COI-5P|KJ838936	S
FBHAP293-09|Osmia aurulenta|COI-5P|HM376214	S
ABEE184-17|Osmia aurulenta|COI-5P	S
BEECC881-09|Osmia austromaritima|COI-5P	S
BEECC994-09|Osmia austromaritima|COI-5P	S
BEECB864-07|Heriades AZ01|COI-5P	S
BOFWM073-08|Osmia azteca|COI-5P	S
BEECC1224-09|Osmia bakeri|COI-5P	S
ABBOL023-15|Euaspis basalis|COI-5P	S
GBMIN13942-13|Hoplitis bassana|COI-5P|JQ677487	S
TTHYW397-08|Osmia bc3|COI-5P|KM560819	S
TTHYW430-08|Hoplitis bc4|COI-5P|KM568799	S
TTHYW315-08|Hoplitis bc4|COI-5P|KM562022	S
TTHYW431-08|Hoplitis bc4|COI-5P|KM563257	S
BEECB438-07|Osmia bella|COI-5P	S
BBHYL359-10|Osmia bella|COI-5P|JN293797	S
BEECB439-07|Osmia bella|COI-5P	S
GBMIN13927-13|Hoplitis benoisti|COI-5P|JQ677529	S
BOFTH388-09|Megachile bicolor|COI-5P	S
GBACU1880-12|Osmia bicolor|COI-5P|KJ837448	S
GBACU1839-12|Osmia bicolor|COI-5P|KJ838412	S
GBACU1882-12|Osmia bicolor|COI-5P|KJ836751	S
GBACU792-12|Osmia bicolor|COI-5P|KJ838444	S
GBACU1879-12|Osmia bicolor|COI-5P|KJ837422	S
GBACU1881-12|Osmia bicolor|COI-5P|KJ839576	S
BEEEE181-15|Osmia bicolor|COI-5P	S
FBHAP295-09|Osmia bicolor|COI-5P|HM901909	S
FBHAP296-09|Osmia bicolor|COI-5P|KJ838704	S
GBACU793-12|Osmia bicolor|COI-5P|KJ839206	S
GBMIN78101-17|Osmia bicolor|COI-5P|KX374764	S
GBMIN78100-17|Osmia bicolor|COI-5P|KX374763	S
NOBEE055-09|Osmia bicolor|COI-5P	S
NOBEE056-09|Osmia bicolor|COI-5P	S
GBMIN78109-17|Osmia bicornis|COI-5P|KX957860	S
GBMIN78104-17|Osmia bicornis|COI-5P|KX957862	S
GBMIN78115-17|Osmia bicornis|COI-5P|KX957861	S
GBMIN78105-17|Osmia bicornis|COI-5P|KX957867	S
GBMIN78116-17|Osmia bicornis|COI-5P|KX957869	S
GBMIN78118-17|Osmia bicornis|COI-5P|KX957865	S
GBMIN78111-17|Osmia bicornis|COI-5P|KX957868	S
GBMIN78114-17|Osmia bicornis|COI-5P|KX957866	S
GBMIN78107-17|Osmia bicornis|COI-5P|KX957905	S
GBMIN78103-17|Osmia bicornis|COI-5P|KX957864	S
GBMIN78113-17|Osmia bicornis|COI-5P|KX957903	S
GBMIN78112-17|Osmia bicornis|COI-5P|KX957902	S
GBMIN78110-17|Osmia bicornis|COI-5P|KX374766	S
GBMIN78106-17|Osmia bicornis|COI-5P|KX374769	S
GBMIN78108-17|Osmia bicornis|COI-5P|KX374768	S
GBMIN78102-17|Osmia bicornis|COI-5P|KX374770	S
GBMIN78117-17|Osmia bicornis|COI-5P|KX374765	S
BEEEE274-16|Osmia bicornis|COI-5P	S
BEEEE070-15|Osmia bicornis|COI-5P|KT074073	S
NOBEE059-09|Osmia bicornis|COI-5P	S
FBHAP300-09|Osmia bicornis|COI-5P|GU705980	S
FBHAP299-09|Osmia bicornis|COI-5P|GU705981	S
NOBEE060-09|Osmia bicornis|COI-5P	S
FBHAP297-09|Osmia bicornis|COI-5P|GU705976	S
FBHAP302-09|Osmia bicornis|COI-5P|GU705978	S
FBHAP187-09|Osmia bicornis|COI-5P|KJ837855	S
FBHAP303-09|Osmia bicornis|COI-5P|GU705983	S
BCHYM1499-13|Osmia bicornis|COI-5P|KJ839742	S
FBHAP301-09|Osmia bicornis|COI-5P|GU705979	S
GBACU1883-12|Osmia bicornis|COI-5P|KJ837790	S
FBHAP186-09|Osmia bicornis|COI-5P|KJ837713	S
ABEE108-17|Osmia bidentata|COI-5P	S
GBMIN13970-13|Hoplitis bifoveolata|COI-5P|JQ677502	S
BEECA744-07|Hoplitis biscutellae|COI-5P	S
BEECA743-07|Hoplitis biscutellae|COI-5P	S
BEECA745-07|Hoplitis biscutellae|COI-5P	S
GBMIN13935-13|Hoplitis bisulca|COI-5P|JQ677503	S
BEECA907-07|Notanthidium bizonatum|COI-5P|KX820612	S
GBMIN143362-18|Megachile bombiformis|COI-5P|KX580317	S
GBMIN143385-18|Megachile bombycina|COI-5P|KX580340	S
GBMIN13918-13|Hoplitis brachypogon|COI-5P|JQ677583	S
GBMIN78119-17|Osmia brevicornis|COI-5P|KX957901	S
BCHYM1492-13|Osmia brevicornis|COI-5P|KJ838945	S
FBAPB674-09|Osmia brevicornis|COI-5P|HM401200	S
BCHYM1493-13|Osmia brevicornis|COI-5P|KJ837162	S
BCHYM1491-13|Osmia brevicornis|COI-5P|KJ838766	S
FBAPB673-09|Osmia brevicornis|COI-5P|HQ948075	S
FBAPC356-10|Osmia brevicornis|COI-5P|KJ838005	S
FBAPC355-10|Osmia brevicornis|COI-5P|KJ838835	S
ABEE188-17|Osmia brevicornis|COI-5P	S
GBACU1435-12|Coelioxys brevis|COI-5P|KJ838276	S
GBACU1436-12|Coelioxys brevis|COI-5P|KJ837761	S
UPOLB067-09|Megachile brevis|COI-5P|KF839651	S
UPOLL182-09|Megachile brevis|COI-5P|KF839633	S
UPOLB183-09|Megachile brevis|COI-5P|KF839638	S
UPOLB782-09|Megachile brevis|COI-5P|KF839639	S
UPOLB099-09|Megachile brevis|COI-5P|KF839648	S
UPOLB147-09|Megachile brevis|COI-5P|KF839649	S
UPOLL831-09|Megachile brevis|COI-5P|KF839631	S
UPOLB127-09|Megachile brevis|COI-5P|KF839650	S
UPOLL419-09|Megachile brevis|COI-5P|KF839636	S
BEECA157-06|Megachile brevis|COI-5P|KF839644	S
BEECB523-07|Megachile brevis|COI-5P|KF839634	S
BEECA117-06|Megachile brevis|COI-5P|KF839643	S
BEECA156-06|Megachile brevis|COI-5P|KF839640	S
BCT009-06|Megachile brevis|COI-5P	S
BCT002-06|Megachile brevis|COI-5P	S
UPOLB093-09|Megachile brevis|COI-5P|KF839641	S
UPOLB463-09|Megachile brevis|COI-5P|KF839642	S
BEECA464-06|Megachile brevis|COI-5P|KF839646	S
UPOLC069-09|Megachile brevis|COI-5P|KF839630	S
CRHIA126-15|Megachile brevis|COI-5P|MG348733	S
BEECB464-07|Megachile brevis|COI-5P|KF839647	S
GMOSK846-15|Megachile brevis|COI-5P|MG352953	S
BEECB357-07|Osmia brevis|COI-5P	S
BEECC718-09|Osmia brevis|COI-5P	S
BEECC1180-09|Osmia brevis|COI-5P	S
BEECC719-09|Osmia brevis|COI-5P	S
BEECC1181-09|Osmia brevis|COI-5P	S
BEECB355-07|Osmia brevis|COI-5P	S
BEECB356-07|Osmia brevis|COI-5P	S
BEECC1179-09|Osmia brevis|COI-5P	S
BEECC243-08|Osmia brevis|COI-5P	S
BEECC197-08|Osmia brevis|COI-5P	S
FBAPC343-10|Stelis breviuscula|COI-5P|KJ836524	S
FBAPC342-10|Stelis breviuscula|COI-5P|KJ838623	S
FBAPD932-11|Stelis breviuscula|COI-5P|KJ838915	S
GBACU3503-13|Stelis breviuscula|COI-5P|KJ838642	S
GBACU3501-13|Stelis breviuscula|COI-5P|KJ836717	S
GBACU3502-13|Stelis breviuscula|COI-5P|KJ839384	S
FBAPC610-11|Stelis breviuscula|COI-5P|KJ837111	S
GBACU3500-13|Stelis breviuscula|COI-5P|KJ837471	S
FBAPB785-09|Stelis breviuscula|COI-5P|HQ948104	S
FBAPB782-09|Stelis breviuscula|COI-5P|HQ948103	S
FBAPC609-11|Stelis breviuscula|COI-5P|KJ836893	S
BEEEE079-15|Stelis breviuscula|COI-5P|KT074082	S
BEEEE217-15|Stelis breviuscula|COI-5P	S
BEECA478-06|Megachile brimleyi|COI-5P	S
BEECA491-06|Megachile brimleyi|COI-5P	S
BEECC198-08|Osmia bruneri|COI-5P	S
BEECB495-07|Osmia bruneri|COI-5P	S
BEECB437-07|Osmia bruneri|COI-5P	S
BEECC1184-09|Osmia bruneri|COI-5P	S
BEECB422-07|Ashmeadiella bucconis|COI-5P	S
BEECB423-07|Ashmeadiella bucconis|COI-5P	S
BEECB863-07|Ashmeadiella bucconis|COI-5P	S
OPPQM054-17|Osmia bucephala|COI-5P	S
CNWBE748-13|Osmia bucephala|COI-5P|KM558514	S
HCBNS175-03|Osmia bucephala|COI-5P|FJ582417	S
HCBNS176-03|Osmia bucephala|COI-5P|FJ582418	S
HCBNS177-03|Osmia bucephala|COI-5P|FJ582419	S
BBHYL277-10|Osmia bucephala|COI-5P|MG502301	S
BUSA235-05|Osmia bucephala|COI-5P	S
BBHEC179-09|Osmia bucephala|COI-5P|KM556185	S
GBMIN143413-18|Megachile bullata|COI-5P|KX580368	S
GBMIN143392-18|Megachile burdigalensis|COI-5P|KX580347	S
FBHAP390-09|Trachusa byssina|COI-5P|GU706012	S
FBHAP389-09|Trachusa byssina|COI-5P|KJ839233	S
FBAPC732-11|Trachusa byssina|COI-5P|KJ838247	S
FBAPB448-09|Trachusa byssina|COI-5P|HM401138	S
BCHYM1516-13|Trachusa byssina|COI-5P|KJ836778	S
GBACU1159-12|Trachusa byssina|COI-5P|KJ837314	S
FBAPD948-11|Trachusa byssina|COI-5P|KJ838492	S
NOBEE047-09|Trachusa byssina|COI-5P	S
FBAPB447-09|Trachusa byssina|COI-5P|KJ838989	S
GBLGC039-12|Trachusa byssina|COI-5P|KJ836539	S
GBLGC040-12|Trachusa byssina|COI-5P|KJ838963	S
GBAH4612-09|Chelostoma bytinskii|COI-5P|EU863074	S
BEECC535-08|Heriades CA1|COI-5P	S
BEECB425-07|Ashmeadiella cactorum|COI-5P	S
BEECB424-07|Ashmeadiella cactorum|COI-5P	S
JSYKA127-10|Osmia caerulescens|COI-5P|HM860302	S
FBHAP305-09|Osmia caerulescens|COI-5P|HM901911	S
HCBNS170-03|Osmia caerulescens|COI-5P|FJ582421	S
HCBNS171-03|Osmia caerulescens|COI-5P|FJ582422	S
HCBNS169-03|Osmia caerulescens|COI-5P|FJ582420	S
FBHAP307-09|Osmia caerulescens|COI-5P|HM901912	S
FBHAP304-09|Osmia caerulescens|COI-5P|HM901910	S
GBAH11806-15|Osmia caerulescens|COI-5P|KP696364	S
UPOLB868-09|Osmia caerulescens|COI-5P	S
UPOLB878-09|Osmia caerulescens|COI-5P	S
ASGLE403-10|Osmia caerulescens|COI-5P|JN289032	S
UPOLL124-09|Osmia caerulescens|COI-5P	S
FBAPD373-11|Osmia caerulescens|COI-5P|KJ836678	S
FBAPD118-11|Osmia caerulescens|COI-5P|KJ836406	S
BEECC186-08|Osmia caerulescens|COI-5P	S
FBAPD374-11|Osmia caerulescens|COI-5P|KJ838733	S
BEEEE071-15|Osmia caerulescens|COI-5P|KT074074	S
GBMIN78120-17|Osmia caerulescens|COI-5P|KT123237	S
GMGMK468-14|Osmia caerulescens|COI-5P	S
GMGMA1014-14|Osmia caerulescens|COI-5P	S
ABEE190-17|Osmia caerulescens|COI-5P	S
FBHAP133-09|Osmia caerulescens|COI-5P|KJ839644	S
BEECB711-07|Ashmeadiella californica|COI-5P	S
BEECB427-07|Ashmeadiella californica|COI-5P	S
BEECB426-07|Ashmeadiella californica|COI-5P	S
BEECB744-07|Osmia californica|COI-5P	S
BEECB745-07|Osmia californica|COI-5P	S
BEECC882-09|Osmia californica|COI-5P	S
BEECC884-09|Osmia californica|COI-5P	S
BEECB348-07|Osmia californica|COI-5P	S
BEECB743-07|Osmia californica|COI-5P	S
BEECB510-07|Osmia californica|COI-5P	S
GBAH4611-09|Chelostoma californicum|COI-5P|EU863075	S
BEECB435-07|Osmia calla|COI-5P	S
BEECB505-07|Osmia calla|COI-5P	S
BEECB492-07|Osmia calla|COI-5P	S
BEECB506-07|Osmia calla|COI-5P	S
BEECB434-07|Osmia calla|COI-5P	S
BEECB392-07|Stelis calliphorina|COI-5P	S
BOFTH397-09|Megachile Callomegachile THA05|COI-5P	S
SCRAP065-14|Othinosmia calviniae|COI-5P	S
SCRAP041-14|Othinosmia calviniae|COI-5P	S
SCRAP029-14|Othinosmia calviniae|COI-5P	S
SCRAP053-14|Othinosmia calviniae|COI-5P	S
DIAL200-06|Megachile campanulae|COI-5P	S
BEECA840-07|Megachile campanulae|COI-5P	S
BEECA842-07|Megachile campanulae|COI-5P	S
JSHYN895-11|Megachile campanulae|COI-5P|KR807334	S
BEECA841-07|Megachile campanulae|COI-5P	S
BCT008-06|Megachile campanulae|COI-5P	S
UPOLC073-09|Megachile campanulae|COI-5P	S
UPOLB015-09|Chelostoma campanularum|COI-5P	S
FBAPB761-09|Chelostoma campanularum|COI-5P|HM401237	S
FBAPB762-09|Chelostoma campanularum|COI-5P|HM401238	S
GBACU3704-13|Chelostoma campanularum|COI-5P|KJ837936	S
JSHYN631-11|Chelostoma campanularum|COI-5P|KR797781	S
UPOLB409-09|Chelostoma campanularum|COI-5P	S
UPOLB401-09|Chelostoma campanularum|COI-5P	S
JSHYN372-11|Chelostoma campanularum|COI-5P|KR784479	S
UPOLL179-09|Chelostoma campanularum|COI-5P	S
JSHYN103-11|Chelostoma campanularum|COI-5P|KR790126	S
OPPOE304-17|Chelostoma campanularum|COI-5P	S
UPOLB415-09|Chelostoma campanularum|COI-5P	S
UPOLB413-09|Chelostoma campanularum|COI-5P	S
JSHYN334-11|Chelostoma campanularum|COI-5P|KR808263	S
JSHYN095-11|Chelostoma campanularum|COI-5P|KR792705	S
UPOLL177-09|Chelostoma campanularum|COI-5P	S
UPOLL387-09|Chelostoma campanularum|COI-5P	S
UPOLB399-09|Chelostoma campanularum|COI-5P	S
UPOLL521-09|Chelostoma campanularum|COI-5P	S
UPOLB410-09|Chelostoma campanularum|COI-5P	S
UPOLL178-09|Chelostoma campanularum|COI-5P	S
UPOLL928-09|Chelostoma campanularum|COI-5P	S
BEECA159-06|Chelostoma campanularum|COI-5P	S
BEECA158-06|Chelostoma campanularum|COI-5P	S
UPOLB843-09|Chelostoma campanularum|COI-5P	S
JSHYN096-11|Chelostoma campanularum|COI-5P|KR794260	S
UPOLB403-09|Chelostoma campanularum|COI-5P	S
JSHYN470-11|Chelostoma campanularum|COI-5P|KR794488	S
UPOLB907-09|Chelostoma campanularum|COI-5P	S
UPOLB402-09|Chelostoma campanularum|COI-5P	S
UPOLB393-09|Chelostoma campanularum|COI-5P	S
UPOLB400-09|Chelostoma campanularum|COI-5P	S
MBIOF1201-13|Chelostoma campanularum|COI-5P|KR803540	S
UPOLB425-09|Chelostoma campanularum|COI-5P	S
UPOLB398-09|Chelostoma campanularum|COI-5P	S
FBAPB759-09|Chelostoma campanularum|COI-5P|JN281384	S
UPOLB404-09|Chelostoma campanularum|COI-5P	S
FBHAP188-09|Chelostoma campanularum|COI-5P|KJ837919	S
UPOLB395-09|Chelostoma campanularum|COI-5P	S
ABEE200-17|Chelostoma campanularum|COI-5P	S
BEEEE214-15|Chelostoma campanularum|COI-5P	S
GMGML1541-14|Chelostoma campanularum|COI-5P	S
GMGML954-14|Chelostoma campanularum|COI-5P	S
GMGMM873-14|Chelostoma campanularum|COI-5P	S
GMGMN846-14|Chelostoma campanularum|COI-5P	S
GMGML968-14|Chelostoma campanularum|COI-5P	S
GMGMM903-14|Chelostoma campanularum|COI-5P	S
GMGML914-14|Chelostoma campanularum|COI-5P	S
GMGML1523-14|Chelostoma campanularum|COI-5P	S
GMGML986-14|Chelostoma campanularum|COI-5P	S
GMGMN603-14|Chelostoma campanularum|COI-5P	S
GMGMM691-14|Chelostoma campanularum|COI-5P	S
GMGMA678-14|Chelostoma campanularum|COI-5P	S
BEECA248-06|Chelostoma campanularum|COI-5P	S
GMGMN625-14|Chelostoma campanularum|COI-5P	S
GMGMA141-14|Chelostoma campanularum|COI-5P	S
GMGML1563-14|Chelostoma campanularum|COI-5P	S
FBHAP311-09|Chelostoma campanularum|COI-5P|KJ838694	S
FBHAP312-09|Chelostoma campanularum|COI-5P|KJ838875	S
FBHAP308-09|Chelostoma campanularum|COI-5P|HM901913	S
FBHAP310-09|Chelostoma campanularum|COI-5P|KJ837782	S
GBAH4610-09|Chelostoma campanularum|COI-5P|EU863076	S
BEEEE036-15|Chelostoma campanularum|COI-5P|KT074039	S
GMGMN1541-14|Chelostoma campanularum|COI-5P	S
GBMIN13981-13|Hoplitis capsulifer|COI-5P|JQ677476	S
BEECC960-09|Osmia cara|COI-5P	S
BEECC961-09|Osmia cara|COI-5P	S
BEECC951-09|Osmia caraformis|COI-5P	S
BEECC950-09|Osmia caraformis|COI-5P	S
GBMIN78082-17|Anthidiellum carinatum|COI-5P|KY072409	S
GBMIN78081-17|Anthidiellum carinatum|COI-5P|KY072690	S
HCBNS219-03|Heriades carinatus|COI-5P|FJ582231	S
HCBNS220-03|Heriades carinatus|COI-5P|FJ582232	S
BEECB861-07|Heriades carinatus|COI-5P	S
BBHYK188-10|Heriades carinatus|COI-5P|JF864702	S
BBHYK186-10|Heriades carinatus|COI-5P|JF864700	S
BBHYI141-10|Heriades carinatus|COI-5P|JN292264	S
BBHYK685-10|Heriades carinatus|COI-5P|JN293449	S
BBHYL343-10|Heriades carinatus|COI-5P|JN293783	S
JSHYN186-11|Heriades carinatus|COI-5P|KR786504	S
BBHYL373-10|Heriades carinatus|COI-5P|JN293809	S
BBHYL170-10|Heriades carinatus|COI-5P|JN293653	S
BBHYK187-10|Heriades carinatus|COI-5P|JF864701	S
BBHYL571-10|Heriades carinatus|COI-5P|JN293912	S
BBHYJ582-10|Heriades carinatus|COI-5P|JF864414	S
BEECB842-07|Heriades carinatus|COI-5P	S
CNPPF1225-12|Heriades carinatus|COI-5P|KJ163559	S
OPPQO028-17|Heriades carinatus|COI-5P	S
ASAHY156-13|Heriades carinatus|COI-5P	S
HCBNS144-03|Heriades carinatus|COI-5P|FJ582230	S
BEECB841-07|Heriades carinatus|COI-5P	S
MBIOF1894-13|Heriades carinatus|COI-5P|KR785850	S
BEECB396-07|Stelis carniflex|COI-5P	S
FBAPC742-11|Rhodanthidium caturigense|COI-5P|KJ836719	S
GBGST084-13|Rhodanthidium caturigense|COI-5P|KJ839427	S
FBAPC743-11|Rhodanthidium caturigense|COI-5P|KJ839139	S
FBAPD322-11|Rhodanthidium caturigense|COI-5P|KJ839590	S
FBAPD324-11|Rhodanthidium caturigense|COI-5P|KJ837384	S
GBMIN143363-18|Coelioxys caudata|COI-5P|KX580318	S
GBACU3237-13|Megachile centuncularis|COI-5P|KJ839045	S
ABEE050-17|Megachile centuncularis|COI-5P	S
GBACU3236-13|Megachile centuncularis|COI-5P|KJ836985	S
FBAPC634-11|Megachile centuncularis|COI-5P|KJ839746	S
FBAPC635-11|Megachile centuncularis|COI-5P|KJ838928	S
GBACU3239-13|Megachile centuncularis|COI-5P|KJ838237	S
FBAPB639-09|Megachile centuncularis|COI-5P|HM401192	S
GBACU2119-13|Megachile centuncularis|COI-5P|KJ838449	S
BCHYM1500-13|Megachile centuncularis|COI-5P|KJ837118	S
ASGLE819-10|Megachile centuncularis|COI-5P|JN289126	S
UPOLL767-09|Megachile centuncularis|COI-5P	S
UPOLL386-09|Megachile centuncularis|COI-5P	S
UPOLC093-09|Megachile centuncularis|COI-5P	S
UPOLC085-09|Megachile centuncularis|COI-5P	S
UPOLC086-09|Megachile centuncularis|COI-5P	S
FBAPC380-10|Megachile centuncularis|COI-5P|KJ837180	S
UPOLC072-09|Megachile centuncularis|COI-5P	S
UPOLC079-09|Megachile centuncularis|COI-5P	S
UPOLC074-09|Megachile centuncularis|COI-5P	S
HCBNS162-03|Megachile centuncularis|COI-5P|KR797019	S
HCBNS161-03|Megachile centuncularis|COI-5P|KR808115	S
HCBNS133-03|Megachile centuncularis|COI-5P|FJ582307	S
GBACU327-12|Megachile centuncularis|COI-5P|KJ838410	S
FBAPB637-09|Megachile centuncularis|COI-5P|HQ948067	S
BEEEE060-15|Megachile centuncularis|COI-5P|KT074063	S
BEEEE104-15|Megachile centuncularis|COI-5P	S
CRHIE360-15|Megachile centuncularis|COI-5P|MG354739	S
IBBP143-10|Megachile centuncularis|COI-5P|JQ909787	S
MBIOF1884-13|Megachile centuncularis|COI-5P|KR801773	S
MBIOF1889-13|Megachile centuncularis|COI-5P|KR798219	S
ABEE195-17|Megachile centuncularis|COI-5P	S
FBAPB636-09|Megachile centuncularis|COI-5P|HQ948066	S
SDBEE253-12|Dioxys cf. producta|COI-5P	S
GMSUJ029-15|Megachile cf. privigna|COI-5P	S
GMSUA131-14|Megachile cf. privigna|COI-5P	S
SDBEE280-12|Osmia cf. granulosa|COI-5P	S
BEECC209-08|Osmia cf. pusilla|COI-5P	S
SDBEE279-12|Osmia cf. clarescens|COI-5P	S
SCRAP077-14|Othinosmia cf. nitidula|COI-5P	S
BEECA663-07|Osmia chalybea|COI-5P	S
HMBME115-07|Megachile chelostomoides|COI-5P	S
HMBME173-07|Megachile chelostomoides|COI-5P	S
GBMIN143416-18|Megachile chelostomoides|COI-5P|KX580371	S
BBHYA884-12|Megachile chilopsidis|COI-5P	S
BBHYA534-12|Megachile chilopsidis|COI-5P	S
BBHYA535-12|Megachile chilopsidis|COI-5P	S
BBHYA536-12|Megachile chilopsidis|COI-5P	S
BBHYA891-12|Megachile chilopsidis|COI-5P	S
GBMIN13976-13|Hoplitis christae|COI-5P|JQ677488	S
GBMIN143376-18|Megachile chrysorrhoea|COI-5P|KX580331	S
GBACU1441-12|Lithurgus chrysurus|COI-5P|KJ837641	S
ABEE047-17|Lithurgus chrysurus|COI-5P	S
FBAPC601-11|Lithurgus chrysurus|COI-5P|KJ836731	S
ABEE129-17|Lithurgus chrysurus|COI-5P	S
GBAH4632-09|Lithurgus chrysurus|COI-5P|EU863054	S
ABEE094-17|Dioxys cincta|COI-5P	S
FBAPC622-11|Dioxys cincta|COI-5P|KJ836409	S
ABEE020-17|Dioxys cinctus|COI-5P	S
FBAPC525-11|Megachile circumcincta|COI-5P|KJ839014	S
NOBEE053-09|Megachile circumcincta|COI-5P	S
BCHYM1503-13|Megachile circumcincta|COI-5P|KJ837002	S
FBAPB387-09|Megachile circumcincta|COI-5P|HM401105	S
FBHAP341-09|Megachile circumcincta|COI-5P|GU705984	S
FBHAP342-09|Megachile circumcincta|COI-5P|GU705991	S
GBACU953-12|Megachile circumcincta|COI-5P|KJ836498	S
BEECA161-06|Megachile circumcincta|COI-5P	S
BEECA808-07|Megachile circumcincta|COI-5P	S
BEECB681-07|Megachile circumcincta|COI-5P	S
BEECB032-07|Megachile circumcincta|COI-5P	S
BEECB679-07|Megachile circumcincta|COI-5P	S
BEECB682-07|Megachile circumcincta|COI-5P	S
BEECA807-07|Megachile circumcincta|COI-5P	S
BEECA810-07|Megachile circumcincta|COI-5P	S
FBHAP340-09|Megachile circumcincta|COI-5P|GU705985	S
BEECA026-06|Megachile circumcincta|COI-5P	S
BEECA025-06|Megachile circumcincta|COI-5P	S
BEECA160-06|Megachile circumcincta|COI-5P	S
GBMIN13949-13|Haetosmia circumventa|COI-5P|JQ677592	S
SRIRP008-15|Osmia claremontensis|COI-5P	S
FBAPB675-09|Hoplitis claviventris|COI-5P|HM401201	S
NOBEE064-09|Hoplitis claviventris|COI-5P	S
GBACU3274-13|Hoplitis claviventris|COI-5P|KJ837591	S
GBCHA1055-13|Hoplitis claviventris|COI-5P|KJ838228	S
FBHAP315-09|Hoplitis claviventris|COI-5P|HM901916	S
FBHAP316-09|Hoplitis claviventris|COI-5P|HM901917	S
FBHAP314-09|Hoplitis claviventris|COI-5P|HM901915	S
BEEEE185-15|Hoplitis claviventris|COI-5P	S
NOBEE063-09|Hoplitis claviventris|COI-5P	S
BEECB797-07|Megachile cleomis|COI-5P|KF839653	S
BEECC946-09|Megachile cleomis|COI-5P|KF839657	S
BEECB552-07|Megachile cleomis|COI-5P|KF839652	S
BEECC795-09|Megachile cleomis|COI-5P|KF839656	S
BEECC796-09|Megachile cleomis|COI-5P|KF839655	S
BEECA180-06|Anthidium clypeodentatum|COI-5P	S
TTHYW052-08|Anthidium clypeodentatum|COI-5P|KM564406	S
BEECA014-06|Anthidium clypeodentatum|COI-5P	S
BEECA015-06|Anthidium clypeodentatum|COI-5P	S
NGNAD1561-13|Anthidium clypeodentatum|COI-5P|KR881569	S
ASGCB241-13|Stelis coarctatus|COI-5P	S
HDBNS062-03|Stelis coarctatus|COI-5P|FJ582503	S
BEECC1189-09|Osmia cobaltina|COI-5P	S
BEECB454-07|Osmia cobaltina|COI-5P	S
BEECB453-07|Osmia cobaltina|COI-5P	S
GBAH4609-09|Chelostoma cockerelli|COI-5P|EU863077	S
GBMIN143401-18|Megachile cockerelli|COI-5P|KX580356	S
BEECC1196-09|Osmia cockerelli|COI-5P	S
BEECC872-09|Osmia cockerelli|COI-5P	S
BEECC880-09|Osmia cockerelli|COI-5P	S
BEECC879-09|Osmia cockerelli|COI-5P	S
SDBEE216-12|Anthidium collectum|COI-5P	S
SDBEE215-12|Anthidium collectum|COI-5P	S
BEECC521-08|Osmia collinsiae|COI-5P	S
BEECC274-08|Osmia collinsiae|COI-5P	S
BEECC522-08|Osmia collinsiae|COI-5P	S
BEECC275-08|Osmia collinsiae|COI-5P	S
BUSA371-05|Osmia collinsiae|COI-5P	S
BEECC273-08|Osmia collinsiae|COI-5P	S
BUSA372-05|Osmia collinsiae|COI-5P	S
BBHYL364-10|Osmia coloradensis|COI-5P|JN293802	S
BEECB342-07|Osmia coloradensis|COI-5P	S
TTHYW300-08|Osmia coloradensis|COI-5P|KM562615	S
BEECB340-07|Osmia coloradensis|COI-5P	S
BEECB341-07|Osmia coloradensis|COI-5P	S
BEECB531-07|Osmia coloradensis|COI-5P	S
BEECB343-07|Osmia coloradensis|COI-5P	S
BEECB736-07|Osmia coloradensis|COI-5P	S
BEECB532-07|Osmia coloradensis|COI-5P	S
BEECB339-07|Osmia coloradensis|COI-5P	S
BEECA964-07|Osmia coloradensis|COI-5P	S
BEECB508-07|Osmia coloradensis|COI-5P	S
BEECA131-06|Osmia coloradensis|COI-5P	S
BEECB509-07|Osmia coloradensis|COI-5P	S
BEECA848-07|Megachile concinna|COI-5P	S
SABEE386-15|Coelioxys confusa|COI-5P	S
SABEE519-15|Coelioxys confusa|COI-5P	S
SABEE451-15|Coelioxys confusa|COI-5P	S
SABEE450-15|Coelioxys confusa|COI-5P	S
GMGMK355-14|Coelioxys conica|COI-5P	S
FBAPD369-11|Coelioxys conica|COI-5P|KJ837811	S
FBAPB491-09|Coelioxys conica|COI-5P|KJ839407	S
FBAPC800-11|Coelioxys conica|COI-5P|KJ838457	S
FBAPB488-09|Coelioxys conica|COI-5P|HM401145	S
FBAPC777-11|Coelioxys conica|COI-5P|KJ839605	S
FBAPC799-11|Coelioxys conica|COI-5P|KJ839642	S
FBAPC776-11|Coelioxys conica|COI-5P|KJ836774	S
FBAPC802-11|Coelioxys conica|COI-5P|KJ839108	S
BCHYM1514-13|Coelioxys conica|COI-5P|KJ837669	S
FBACB689-11|Coelioxys conica|COI-5P|KJ838132	S
FBAPC778-11|Coelioxys conica|COI-5P|KJ837157	S
FBAPC775-11|Coelioxys conica|COI-5P|KJ838312	S
FBAPC807-11|Coelioxys conica|COI-5P|KJ836904	S
FBACB688-11|Coelioxys conica|COI-5P|KJ839373	S
FBAPC801-11|Coelioxys conica|COI-5P|KJ837476	S
FBHAP581-09|Coelioxys conica|COI-5P|GU705912	S
FBAPC354-10|Coelioxys conica|COI-5P|KJ836418	S
FBHAP580-09|Coelioxys conica|COI-5P|KJ837542	S
FBHAP177-09|Coelioxys conica|COI-5P|KJ839156	S
BOFTH386-09|Megachile conjuncta|COI-5P	S
GBMIN143368-18|Megachile conjuncta|COI-5P|KX580323	S
CRHIH491-16|Osmia conjuncta|COI-5P|MG348158	S
CRHIJ886-16|Osmia conjuncta|COI-5P|MG346855	S
CRHIJ888-16|Osmia conjuncta|COI-5P|MG351429	S
UPOLB541-09|Osmia conjuncta|COI-5P	S
UPOLL142-09|Osmia conjuncta|COI-5P	S
UPOLB616-09|Osmia conjuncta|COI-5P	S
UPOLB753-09|Osmia conjuncta|COI-5P	S
UPOLB650-09|Osmia conjuncta|COI-5P	S
UPOLL141-09|Osmia conjuncta|COI-5P	S
UPOLB590-09|Osmia conjuncta|COI-5P	S
UPOLB492-09|Osmia conjuncta|COI-5P	S
CRHIF431-16|Osmia conjuncta|COI-5P|MG349403	S
CRHII009-16|Osmia conjuncta|COI-5P|MG353855	S
UPOLB618-09|Osmia conjuncta|COI-5P	S
CRHII003-16|Osmia conjuncta|COI-5P|MG355531	S
CRHII780-16|Osmia conjuncta|COI-5P|MG355897	S
CRHIJ885-16|Osmia conjuncta|COI-5P|MG351206	S
CRHII784-16|Osmia conjuncta|COI-5P|MG348635	S
CRHIJ887-16|Osmia conjuncta|COI-5P|MG350529	S
CRHIF433-16|Osmia conjuncta|COI-5P|MG348558	S
CRHIH493-16|Osmia conjuncta|COI-5P|MG351302	S
CRHII267-16|Osmia conjuncta|COI-5P|MG355627	S
CRHIF005-16|Osmia conjuncta|COI-5P|MG351831	S
CRHII272-16|Osmia conjuncta|COI-5P|MG354648	S
SMTPB13004-13|Osmia conjuncta|COI-5P|KR895801	S
CRHII005-16|Osmia conjuncta|COI-5P|MG349681	S
CRHIF007-16|Osmia conjuncta|COI-5P|MG348988	S
CRHIH007-16|Osmia conjuncta|COI-5P|MG352184	S
CRHII001-16|Osmia conjuncta|COI-5P|MG347954	S
CRHII008-16|Osmia conjuncta|COI-5P|MG349628	S
CRHII010-16|Osmia conjuncta|COI-5P|MG348519	S
CRHIF006-16|Osmia conjuncta|COI-5P|MG346423	S
CRHII778-16|Osmia conjuncta|COI-5P|MG350595	S
CRHIH009-16|Osmia conjuncta|COI-5P|MG353380	S
CRHII011-16|Osmia conjuncta|COI-5P|MG352359	S
SMTPB10101-13|Osmia conjuncta|COI-5P|KR892546	S
CRHIF432-16|Osmia conjuncta|COI-5P|MG346493	S
CRHII269-16|Osmia conjuncta|COI-5P|MG346732	S
CRHIH492-16|Osmia conjuncta|COI-5P|MG351525	S
UPOLB783-09|Osmia conjuncta|COI-5P	S
CRHII006-16|Osmia conjuncta|COI-5P|MG352652	S
BEECA593-06|Osmia conjuncta|COI-5P	S
GBACU1240-12|Coelioxys conoidea|COI-5P|KJ839004	S
GBACU1238-12|Coelioxys conoidea|COI-5P|KJ837264	S
GBACU1995-12|Coelioxys conoidea|COI-5P|KJ837008	S
GBACU1237-12|Coelioxys conoidea|COI-5P|KJ837101	S
FBAPC598-11|Coelioxys conoidea|COI-5P|KJ839313	S
FBACB686-11|Coelioxys conoidea|COI-5P|KJ838145	S
FBAPB490-09|Coelioxys conoidea|COI-5P|HM401146	S
FBACB687-11|Coelioxys conoidea|COI-5P|KJ838799	S
GBACU1994-12|Coelioxys conoidea|COI-5P|KJ837793	S
FBAPC353-10|Coelioxys conoidea|COI-5P|KJ839589	S
GBACU1239-12|Coelioxys conoidea|COI-5P|KJ837920	S
ABEE127-17|Coelioxys conoidea|COI-5P	S
ABEE125-17|Coelioxys conoidea|COI-5P	S
FBAPB492-09|Coelioxys conoidea|COI-5P|KJ839011	S
FBAPB489-09|Coelioxys conoidea|COI-5P|KJ839497	S
BEECC261-08|Atoposmia copelandica|COI-5P	S
BEECC1154-09|Megachile coquilletti|COI-5P|KF839660	S
BEECC173-08|Megachile coquilletti|COI-5P|KF839659	S
BEECC939-09|Megachile coquilletti|COI-5P	S
BEECB584-07|Megachile coquilletti|COI-5P|KF839658	S
BUSA033-05|Trachusa cordaticeps|COI-5P	S
BEECB780-07|Trachusa cordaticeps|COI-5P	S
GBAH3911-08|Osmia cornifrons|COI-5P|EU726596	S
GBAH3944-08|Osmia cornifrons|COI-5P|EU726563	S
GBAH3946-08|Osmia cornifrons|COI-5P|EU726561	S
GBAH3924-08|Osmia cornifrons|COI-5P|EU726583	S
GBAH3909-08|Osmia cornifrons|COI-5P|EU726598	S
GBAH3940-08|Osmia cornifrons|COI-5P|EU726567	S
GBAH3942-08|Osmia cornifrons|COI-5P|EU726565	S
GBAH3945-08|Osmia cornifrons|COI-5P|EU726562	S
GBAH3913-08|Osmia cornifrons|COI-5P|EU726594	S
GBAH3919-08|Osmia cornifrons|COI-5P|EU726588	S
GBAH3952-08|Osmia cornifrons|COI-5P|EU726555	S
GBAH3907-08|Osmia cornifrons|COI-5P|EU726600	S
GBAH3916-08|Osmia cornifrons|COI-5P|EU726591	S
GBAH3915-08|Osmia cornifrons|COI-5P|EU726592	S
GBAH3957-08|Osmia cornifrons|COI-5P|EU726550	S
GBAH3927-08|Osmia cornifrons|COI-5P|EU726580	S
GBAH3928-08|Osmia cornifrons|COI-5P|EU726579	S
GBAH3947-08|Osmia cornifrons|COI-5P|EU726560	S
GBAH3954-08|Osmia cornifrons|COI-5P|EU726553	S
GBAH3929-08|Osmia cornifrons|COI-5P|EU726578	S
GBAH3933-08|Osmia cornifrons|COI-5P|EU726574	S
GBAH3912-08|Osmia cornifrons|COI-5P|EU726595	S
GBAH3934-08|Osmia cornifrons|COI-5P|EU726573	S
GBAH3939-08|Osmia cornifrons|COI-5P|EU726568	S
GBAH3950-08|Osmia cornifrons|COI-5P|EU726557	S
GBAH3926-08|Osmia cornifrons|COI-5P|EU726581	S
GBAH3930-08|Osmia cornifrons|COI-5P|EU726577	S
GBAH3923-08|Osmia cornifrons|COI-5P|EU726584	S
GBAH3949-08|Osmia cornifrons|COI-5P|EU726558	S
GBAH3917-08|Osmia cornifrons|COI-5P|EU726590	S
GBAH3920-08|Osmia cornifrons|COI-5P|EU726587	S
GBAH3921-08|Osmia cornifrons|COI-5P|EU726586	S
GBAH3941-08|Osmia cornifrons|COI-5P|EU726566	S
GBAH3914-08|Osmia cornifrons|COI-5P|EU726593	S
GBAH3956-08|Osmia cornifrons|COI-5P|EU726551	S
GBAH3918-08|Osmia cornifrons|COI-5P|EU726589	S
GBAH3922-08|Osmia cornifrons|COI-5P|EU726585	S
GBAH3925-08|Osmia cornifrons|COI-5P|EU726582	S
GBAH3932-08|Osmia cornifrons|COI-5P|EU726575	S
GBAH3908-08|Osmia cornifrons|COI-5P|EU726599	S
GBAH3931-08|Osmia cornifrons|COI-5P|EU726576	S
GBAH3935-08|Osmia cornifrons|COI-5P|EU726572	S
GBAH3910-08|Osmia cornifrons|COI-5P|EU726597	S
GBAH3943-08|Osmia cornifrons|COI-5P|EU726564	S
GBAH3951-08|Osmia cornifrons|COI-5P|EU726556	S
GBAH3948-08|Osmia cornifrons|COI-5P|EU726559	S
GBAH3953-08|Osmia cornifrons|COI-5P|EU726554	S
GBAH3955-08|Osmia cornifrons|COI-5P|EU726552	S
GBAH3937-08|Osmia cornifrons|COI-5P|EU726570	S
GBAH3959-08|Osmia cornifrons|COI-5P|EU726549	S
GBAH3938-08|Osmia cornifrons|COI-5P|EU726569	S
GBAH3936-08|Osmia cornifrons|COI-5P|EU726571	S
GBAH3891-08|Osmia cornifrons|COI-5P|EU726616	S
GBAH3894-08|Osmia cornifrons|COI-5P|EU726613	S
GBAH3889-08|Osmia cornifrons|COI-5P|EU726618	S
GBAH3892-08|Osmia cornifrons|COI-5P|EU726615	S
GBAH3893-08|Osmia cornifrons|COI-5P|EU726614	S
GBAH3890-08|Osmia cornifrons|COI-5P|EU726617	S
GBAH3887-08|Osmia cornifrons|COI-5P|EU726620	S
GBAH3888-08|Osmia cornifrons|COI-5P|EU726619	S
GBAH3886-08|Osmia cornifrons|COI-5P|EU726621	S
GBAH3884-08|Osmia cornifrons|COI-5P|EU726623	S
GBAH3885-08|Osmia cornifrons|COI-5P|EU726622	S
GBAH3880-08|Osmia cornifrons|COI-5P|EU726627	S
GBAH3879-08|Osmia cornifrons|COI-5P|EU726628	S
GBAH3878-08|Osmia cornifrons|COI-5P|EU726629	S
GBAH3902-08|Osmia cornifrons|COI-5P|EU726605	S
GBAH3901-08|Osmia cornifrons|COI-5P|EU726606	S
GBAH3900-08|Osmia cornifrons|COI-5P|EU726607	S
GBAH3905-08|Osmia cornifrons|COI-5P|EU726602	S
GBAH3896-08|Osmia cornifrons|COI-5P|EU726611	S
GBAH3906-08|Osmia cornifrons|COI-5P|EU726601	S
GBAH3895-08|Osmia cornifrons|COI-5P|EU726612	S
GBAH3897-08|Osmia cornifrons|COI-5P|EU726610	S
GBAH3899-08|Osmia cornifrons|COI-5P|EU726608	S
GBAH3898-08|Osmia cornifrons|COI-5P|EU726609	S
GBAH3904-08|Osmia cornifrons|COI-5P|EU726603	S
GBAH3903-08|Osmia cornifrons|COI-5P|EU726604	S
GBAH3883-08|Osmia cornifrons|COI-5P|EU726624	S
GBAH3882-08|Osmia cornifrons|COI-5P|EU726625	S
GBAH3881-08|Osmia cornifrons|COI-5P|EU726626	S
GBMIN17980-13|Osmia cornifrons|COI-5P|KC135989	S
GBMIN17979-13|Osmia cornifrons|COI-5P|KC135991	S
GBMIN17981-13|Osmia cornifrons|COI-5P|KC135987	S
GBMIN18105-13|Osmia cornifrons|COI-5P|KC135986	S
GBMIN18106-13|Osmia cornifrons|COI-5P|KC135984	S
GBMIN17982-13|Osmia cornifrons|COI-5P|KC135985	S
GBMIN18103-13|Osmia cornifrons|COI-5P|KC135990	S
GBMIN18104-13|Osmia cornifrons|COI-5P|KC135988	S
GBAH0291-06|Osmia cornifrons|COI-5P|AF250938	S
GBMIN143381-18|Megachile cornigera|COI-5P|KX580336	S
GBACU1885-12|Osmia cornuta|COI-5P|KJ838885	S
FBAPD237-11|Osmia cornuta|COI-5P|KJ837960	S
GBACU1884-12|Osmia cornuta|COI-5P|KJ837160	S
FBAPD235-11|Osmia cornuta|COI-5P|KJ839784	S
FBAPC873-11|Osmia cornuta|COI-5P|KJ839217	S
FBAPC874-11|Osmia cornuta|COI-5P|KJ836808	S
FBAPD234-11|Osmia cornuta|COI-5P|KJ839547	S
FBAPC872-11|Osmia cornuta|COI-5P|KJ836653	S
FBAPD238-11|Osmia cornuta|COI-5P|KJ836461	S
FBAPD236-11|Osmia cornuta|COI-5P|KJ839167	S
FBAPD119-11|Osmia cornuta|COI-5P|KJ837387	S
FBAPC871-11|Osmia cornuta|COI-5P|KJ838619	S
FBAPB679-09|Osmia cornuta|COI-5P|HQ948078	S
FBAPB676-09|Osmia cornuta|COI-5P|HQ948076	S
FBAPB678-09|Osmia cornuta|COI-5P|HM401202	S
FBAPB677-09|Osmia cornuta|COI-5P|HQ948077	S
FBAPC955-11|Osmia cornuta|COI-5P|KJ838137	S
GBLGC012-12|Osmia cornuta|COI-5P|KJ838429	S
GBAH4626-09|Osmia cornuta|COI-5P|EU863060	S
GBMIN13917-13|Osmia cornuta|COI-5P|JQ677595	S
ABEE123-17|Lithurgus cornutus|COI-5P	S
LASNA289-08|Stelis costalis|COI-5P	S
BEECA707-07|Stelis costalis|COI-5P	S
BEECC1203-09|Osmia crassa|COI-5P	S
BEECC721-09|Osmia crassa|COI-5P	S
BEECC720-09|Osmia crassa|COI-5P	S
BEECC722-09|Osmia crassa|COI-5P	S
ABEE027-17|Heriades crenulata|COI-5P	S
FBAPC726-11|Heriades crenulatus|COI-5P|KJ837442	S
GBACU1202-12|Heriades crenulatus|COI-5P|KJ839799	S
FBAPC725-11|Heriades crenulatus|COI-5P|KJ836538	S
GBACU1993-12|Heriades crenulatus|COI-5P|KJ837358	S
GBACU1200-12|Heriades crenulatus|COI-5P|KJ837680	S
GBACU1203-12|Heriades crenulatus|COI-5P|KJ839089	S
FBAPD859-11|Heriades crenulatus|COI-5P|KJ836862	S
GBCHA1060-13|Heriades crenulatus|COI-5P|KJ836642	S
FBAPC724-11|Heriades crenulatus|COI-5P|KJ837499	S
FBAPD429-11|Heriades crenulatus|COI-5P|KJ836425	S
FBAPD430-11|Heriades crenulatus|COI-5P|KJ839069	S
GBACU3265-13|Heriades crenulatus|COI-5P|KJ837437	S
FBAPD427-11|Heriades crenulatus|COI-5P|KJ838162	S
GBACU3264-13|Heriades crenulatus|COI-5P|KJ838652	S
GBACU1201-12|Heriades crenulatus|COI-5P|KJ839118	S
FBAPB755-09|Heriades crenulatus|COI-5P|HQ948093	S
GBACU3263-13|Heriades crenulatus|COI-5P|KJ837988	S
GBCHA1059-13|Heriades crenulatus|COI-5P|KJ836866	S
FBAPC976-11|Heriades crenulatus|COI-5P|KJ837563	S
GBACU1992-12|Heriades crenulatus|COI-5P|KJ836884	S
FBAPC978-11|Heriades crenulatus|COI-5P|KJ837439	S
FBAPD428-11|Heriades crenulatus|COI-5P|KJ836453	S
GBCHA1058-13|Heriades crenulatus|COI-5P|KJ839358	S
FBAPC650-11|Heriades crenulatus|COI-5P|KJ838790	S
FBAPB756-09|Heriades crenulatus|COI-5P|HQ948094	S
FBHAP134-09|Heriades crenulatus|COI-5P|KJ839820	S
FBAPC651-11|Heriades crenulatus|COI-5P|KJ838230	S
FBAPC979-11|Heriades crenulatus|COI-5P|KJ836727	S
BEECB469-07|Heriades cressoni|COI-5P	S
GBMIN13969-13|Hoplitis cristatula|COI-5P|JQ677504	S
BEECC302-08|Heriades crucifer|COI-5P	S
BEECC303-08|Heriades crucifer|COI-5P	S
GBMIN13926-13|Hoplitis ctenophora|COI-5P|JQ677533	S
BBHYA1278-12|Dianthidium curvatum|COI-5P	S
BEECC926-09|Dianthidium curvatum|COI-5P	S
BEECB787-07|Dianthidium curvatum|COI-5P	S
BEECC925-09|Dianthidium curvatum|COI-5P	S
BEECC928-09|Dianthidium curvatum|COI-5P	S
BEECC927-09|Dianthidium curvatum|COI-5P	S
BEECB788-07|Dianthidium curvatum|COI-5P	S
BBHYA3871-12|Dianthidium curvatum|COI-5P	S
GBMIN13951-13|Hoplitis curvipes|COI-5P|JQ677584	S
BEECB600-07|Osmia cyanella|COI-5P	S
BEECB735-07|Osmia cyanella|COI-5P	S
BEECC1219-09|Osmia cyanella|COI-5P	S
INRMA3190-15|Hoplitis cylindrica|COI-5P	S
GBMIN143367-18|Coelioxys decipiens|COI-5P|KX580322	S
BUSA018-05|Coelioxys decipiens|COI-5P	S
BEECA492-06|Megachile deflexa|COI-5P	S
BEECA959-07|Osmia densa|COI-5P	S
BEECC955-09|Osmia densa|COI-5P	S
BEECC257-08|Osmia densa|COI-5P	S
BEECA958-07|Osmia densa|COI-5P	S
BEECC954-09|Osmia densa|COI-5P	S
CNGRK589-13|Megachile dentitarsus|COI-5P|KM564817	S
CNGRD1220-12|Megachile dentitarsus|COI-5P|KM556497	S
GBMIN143419-18|Megachile diabolica|COI-5P|KX580374	S
MSAPB765-11|Megachile diligens hedleyi|COI-5P	S
MSAPB545-11|Megachile diligens buxtoni|COI-5P	S
MSAPB488-11|Megachile diligens buxtoni|COI-5P	S
MSAPB579-11|Megachile diligens buxtoni|COI-5P	S
MSAPB537-11|Megachile diligens buxtoni|COI-5P	S
MSAPB801-11|Megachile diligens hedleyi|COI-5P	S
MSAPB491-11|Megachile diligens buxtoni|COI-5P	S
MSAPB542-11|Megachile diligens hedleyi|COI-5P	S
MSAPB483-11|Megachile diligens buxtoni|COI-5P	S
MSAPB497-11|Megachile diligens hedleyi|COI-5P	S
MSAPB546-11|Megachile diligens buxtoni|COI-5P	S
MSAPB552-11|Megachile diligens hedleyi|COI-5P	S
MSAPB585-11|Megachile diligens hedleyi|COI-5P	S
MSAPB672-11|Megachile diligens buxtoni|COI-5P	S
MSAPB485-11|Megachile diligens hedleyi|COI-5P	S
MSAPB603-11|Megachile diligens buxtoni|COI-5P	S
MSAPB533-11|Megachile diligens buxtoni|COI-5P	S
MSAPB654-11|Megachile diligens hedleyi|COI-5P	S
MSAPB608-11|Megachile diligens buxtoni|COI-5P	S
MSAPB551-11|Megachile diligens hedleyi|COI-5P	S
MSAPB487-11|Megachile diligens buxtoni|COI-5P	S
MSAPB507-11|Megachile diligens buxtoni|COI-5P	S
MSAPB540-11|Megachile diligens hedleyi|COI-5P	S
MSAPB550-11|Megachile diligens buxtoni|COI-5P	S
MSAPB541-11|Megachile diligens hedleyi|COI-5P	S
MSAPB484-11|Megachile diligens buxtoni|COI-5P	S
MSAPB529-11|Megachile diligens buxtoni|COI-5P	S
MSAPB490-11|Megachile diligens hedleyi|COI-5P	S
MSAPB543-11|Megachile diligens hedleyi|COI-5P	S
GBAH4622-09|Chelostoma diodon|COI-5P|EU863064	S
BOFTH395-09|Megachile disjuncta|COI-5P	S
ACUFI258-12|Osmia disjuncta|COI-5P|MF040883	S
ABBOL046-15|Megachile disjunctiformis|COI-5P	S
ABBOL047-15|Megachile disjunctiformis|COI-5P	S
BEECB1079-07|Osmia distincta|COI-5P	S
BCT020-06|Osmia distincta|COI-5P	S
GBAH4608-09|Chelostoma distinctum|COI-5P|EU863078	S
GMGMK407-14|Chelostoma distinctum|COI-5P	S
GMGMK705-14|Chelostoma distinctum|COI-5P	S
GMGMK759-14|Chelostoma distinctum|COI-5P	S
GMGMK781-14|Chelostoma distinctum|COI-5P	S
GMGMM944-14|Chelostoma distinctum|COI-5P	S
ABEE230-17|Chelostoma distinctum|COI-5P	S
FBAPD422-11|Chelostoma distinctum|COI-5P|KJ837112	S
FBAPD421-11|Chelostoma distinctum|COI-5P|KJ838260	S
FBAPD419-11|Chelostoma distinctum|COI-5P|KJ838474	S
FBAPD420-11|Chelostoma distinctum|COI-5P|KJ839039	S
FBAPC972-11|Chelostoma distinctum|COI-5P|KJ839761	S
FBAPC973-11|Chelostoma distinctum|COI-5P|KJ838191	S
FBAPC654-11|Chelostoma distinctum|COI-5P|KJ839588	S
FBAPC975-11|Chelostoma distinctum|COI-5P|KJ838773	S
FBHAP313-09|Chelostoma distinctum|COI-5P|HM901914	S
FBAPC653-11|Chelostoma distinctum|COI-5P|KJ839515	S
BEECA963-07|Osmia dolerosa|COI-5P	S
BEECA167-06|Osmia dolerosa|COI-5P	S
BEECA166-06|Osmia dolerosa|COI-5P	S
BEECA168-06|Osmia dolerosa|COI-5P	S
BEECA165-06|Osmia dolerosa|COI-5P	S
BEECA960-07|Osmia dolerosa|COI-5P	S
BEECA788-07|Megachile DOM1|COI-5P	S
BEECA789-07|Megachile DOM1|COI-5P	S
BEECA790-07|Megachile DOM1|COI-5P	S
BEECA786-07|Megachile DOM1|COI-5P	S
SDBEE249-12|Dianthidium dubium|COI-5P	S
SDBEE250-12|Dianthidium dubium|COI-5P	S
BOWGF128-08|Heriades EAFR01|COI-5P	S
FBAPB494-09|Coelioxys echinata|COI-5P|KJ838357	S
FBAPB496-09|Coelioxys echinata|COI-5P|KJ838290	S
FBAPB495-09|Coelioxys echinata|COI-5P|HM401148	S
FBAPB493-09|Coelioxys echinata|COI-5P|HM401147	S
GBAH4621-09|Chelostoma edentulum|COI-5P|EU863065	S
BEECB721-07|Coelioxys edita|COI-5P	S
BEECC416-08|Coelioxys edita|COI-5P	S
BEECC417-08|Coelioxys edita|COI-5P	S
BEECA487-06|Coelioxys edita|COI-5P	S
BEECB444-07|Osmia ednae|COI-5P	S
BEECB738-07|Osmia ednae|COI-5P	S
BEECB737-07|Osmia ednae|COI-5P	S
BEECB443-07|Osmia ednae|COI-5P	S
BEECC196-08|Osmia ednae|COI-5P	S
SSWLE5346-13|Osmia ednae|COI-5P|KM556355	S
BEECC985-09|Osmia ednae|COI-5P	S
BEECC151-08|Anthidium edwardsii|COI-5P	S
BEECB547-07|Anthidium edwardsii|COI-5P	S
BEECB335-07|Atoposmia elongata|COI-5P	S
FBAPC795-11|Coelioxys elongata|COI-5P|KJ837365	S
FBAPC797-11|Coelioxys elongata|COI-5P|KJ837012	S
FBAPC769-11|Coelioxys elongata|COI-5P|KJ839164	S
BEEEE096-15|Coelioxys elongata|COI-5P	S
IBBP067-10|Coelioxys elongata|COI-5P|JQ909711	S
FBAPC783-11|Coelioxys elongata|COI-5P|KJ839365	S
FBAPB498-09|Coelioxys elongata|COI-5P|KJ836813	S
FBHAP368-09|Coelioxys elongata|COI-5P|KJ836814	S
ABEE117-17|Coelioxys elongata|COI-5P	S
BEECC239-08|Stelis elongativentris|COI-5P	S
BEECB715-07|Anthidium emarginatum|COI-5P	S
BEECB565-07|Anthidium emarginatum|COI-5P	S
GBACU1519-12|Chelostoma emarginatum|COI-5P|KJ837355	S
GBAH7444-13|Hoplitis enslini|COI-5P|JQ677565	S
GBMIN13944-13|Hoplitis epeoliformis|COI-5P|JQ677477	S
GBACU952-12|Megachile ericetorum|COI-5P|KJ838546	S
GBACU1126-12|Megachile ericetorum|COI-5P|KJ839569	S
GBACU951-12|Megachile ericetorum|COI-5P|KJ836941	S
GBACU3231-13|Megachile ericetorum|COI-5P|KJ837939	S
GBACU3232-13|Megachile ericetorum|COI-5P|KJ837272	S
ABEE051-17|Megachile ericetorum|COI-5P	S
FBHAP346-09|Megachile ericetorum|COI-5P|GU705988	S
FBHAP343-09|Megachile ericetorum|COI-5P|GU705990	S
FBHAP345-09|Megachile ericetorum|COI-5P|GU705989	S
GBACU1140-12|Megachile ericetorum|COI-5P|KJ838196	S
ABEE052-17|Megachile ericetorum|COI-5P	S
FBHAP183-09|Megachile ericetorum|COI-5P|KJ838653	S
FBHAP344-09|Megachile ericetorum|COI-5P|HM901924	S
GMGMK260-14|Megachile ericetorum|COI-5P	S
GMGMK259-14|Megachile ericetorum|COI-5P	S
GMGMK172-14|Megachile ericetorum|COI-5P	S
GMGML166-14|Megachile ericetorum|COI-5P	S
GBMIN13931-13|Hoplitis erythrogastra|COI-5P|JQ677517	S
GBAH0295-06|Osmia excavata|COI-5P|AF250942	S
BEECC982-09|Osmia exigua|COI-5P	S
BEECB449-07|Osmia exigua|COI-5P	S
BEECC983-09|Osmia exigua|COI-5P	S
BEECB442-07|Osmia exigua|COI-5P	S
BEECB450-07|Osmia exigua|COI-5P	S
BEECA846-07|Megachile exilis parexilis|COI-5P	S
BEECA138-06|Megachile exilis parexilis|COI-5P	S
BEECA489-06|Megachile exilis parexilis|COI-5P	S
BEECA136-06|Megachile exilis parexilis|COI-5P	S
BEECA137-06|Megachile exilis parexilis|COI-5P	S
GBAH4629-09|Ochreriades fasciatus|COI-5P|EU863057	S
GBMIN13925-13|Hoplitis fertoni|COI-5P|JQ677535	S
NGAAC2056-14|Megachile fidelis|COI-5P|KR883111	S
NGNAP052-14|Megachile fidelis|COI-5P|KR892774	S
NGAAC2073-14|Megachile fidelis|COI-5P|KR876331	S
NGNAY2844-14|Megachile fidelis|COI-5P|KR884134	S
NGAAC2092-14|Megachile fidelis|COI-5P|KR889081	S
BEECA190-06|Megachile fidelis|COI-5P	S
BEECB700-07|Megachile fidelis|COI-5P	S
BEECB586-07|Megachile fidelis|COI-5P	S
BEECB621-07|Megachile fidelis|COI-5P	S
NGNAF084-13|Megachile fidelis|COI-5P|KR896944	S
NGAAD1918-14|Megachile fidelis|COI-5P|KR878114	S
GBMIN143370-18|Megachile fimbriata|COI-5P|KX580325	S
GBMIN13961-13|Hoplitis flabellifera|COI-5P|JQ677536	S
GBMIN143393-18|Megachile flabellipes|COI-5P|KX580348	S
GBACU092-12|Megachile flabellipes|COI-5P|KJ839181	S
GBACU091-12|Megachile flabellipes|COI-5P|KJ839135	S
GBACU089-12|Megachile flabellipes|COI-5P|KJ839222	S
GBACU090-12|Megachile flabellipes|COI-5P|KJ836765	S
ABEE053-17|Megachile flabellipes|COI-5P	S
BEECA921-07|Megachile flammiventris|COI-5P|KX821205	S
BOFWM076-08|Megachile flavihirsuta|COI-5P	S
GMEGK008-14|Megachile flavipes|COI-5P	S
GMEGK007-14|Megachile flavipes|COI-5P	S
GMEGK009-14|Megachile flavipes|COI-5P	S
GMEGA004-14|Megachile flavipes|COI-5P	S
GMEGK010-14|Megachile flavipes|COI-5P	S
GMEGA006-14|Megachile flavipes|COI-5P	S
GMEGL005-14|Megachile flavipes|COI-5P	S
GMEGB155-14|Megachile flavipes|COI-5P	S
BOFTH393-09|Megachile floralis|COI-5P	S
FBAPD325-11|Anthidium florentinum|COI-5P|KJ839553	S
FBAPD326-11|Anthidium florentinum|COI-5P|KJ837808	S
GBMIN13946-13|Chelostoma florisomne|COI-5P|JQ677598	S
FBAPC655-11|Chelostoma florisomne|COI-5P|KJ838060	S
FBAPC656-11|Chelostoma florisomne|COI-5P|KJ836779	S
FBAPB758-09|Chelostoma florisomne|COI-5P|KJ838755	S
FBAPD126-11|Chelostoma florisomne|COI-5P|KJ838117	S
FBHAP318-09|Chelostoma florisomne|COI-5P|KJ837513	S
FBAPB757-09|Chelostoma florisomne|COI-5P|KJ836525	S
BEEEE225-15|Chelostoma florisomne|COI-5P	S
FBHAP319-09|Chelostoma florisomne|COI-5P|KJ838637	S
GBAH4620-09|Chelostoma florisomne|COI-5P|EU863066	S
HDBNS059-03|Stelis foederalis|COI-5P|FJ582501	S
HDBNS058-03|Stelis foederalis|COI-5P|FJ582500	S
GBMIN143410-18|Megachile fortis|COI-5P|KX580365	S
GBAH4607-09|Chelostoma foveolatum|COI-5P|EU863079	S
FBAPB807-09|Stelis franconica|COI-5P|KJ838696	S
DLII593-07|Megachile fraterna|COI-5P	S
GBMIN13980-13|Hoplitis freygessneri|COI-5P|JQ677478	S
BBHEC168-09|Megachile frigida|COI-5P|GU690142	S
CNWLF1970-12|Megachile frigida|COI-5P|KM563629	S
SSBAD6157-13|Megachile frigida|COI-5P|KM569130	S
UPOLB007-09|Megachile frigida|COI-5P	S
SSBAD6163-13|Megachile frigida|COI-5P|KM557767	S
TTHYW311-08|Megachile frigida|COI-5P|KM560033	S
TTHYW143-08|Megachile frigida|COI-5P|KM561629	S
UPOLL123-09|Megachile frigida|COI-5P	S
BBHEC164-09|Megachile frigida|COI-5P|GU690141	S
TTHYW652-08|Megachile frigida|COI-5P|KM556167	S
BBHYL305-10|Megachile frigida|COI-5P|JN293754	S
TTHYW302-08|Megachile frigida|COI-5P|KM559890	S
BBHYL294-10|Megachile frigida|COI-5P|JN293744	S
UPOLB825-09|Megachile frigida|COI-5P	S
BBHYL293-10|Megachile frigida|COI-5P|JN293743	S
TTHYW358-08|Megachile frigida|COI-5P|KM564616	S
BBHYL304-10|Megachile frigida|COI-5P|JN293753	S
TTHYW144-08|Megachile frigida|COI-5P|KM568581	S
UPOLL425-09|Megachile frigida|COI-5P	S
BBHYL306-10|Megachile frigida|COI-5P|JN293755	S
BEECB031-07|Megachile frigida|COI-5P	S
TTHYW445-08|Megachile frigida|COI-5P|KM557739	S
BEECB561-07|Megachile frigida|COI-5P	S
UPOLL114-09|Megachile frigida|COI-5P	S
UPOLL176-09|Megachile frigida|COI-5P	S
BEECB680-07|Megachile frigida|COI-5P	S
TTHYW391-08|Megachile frigida|COI-5P|KM567136	S
HMBCH068-07|Megachile frigida|COI-5P|JX829541	S
UPOLB018-09|Megachile frigida|COI-5P	S
HPPPI1431-13|Megachile frigida|COI-5P|KR807890	S
HCBNS138-03|Megachile frigida|COI-5P|FJ582311	S
HCBNS217-03|Megachile frigida|COI-5P|FJ582310	S
HCBNS216-03|Megachile frigida|COI-5P|FJ582308	S
HDBNS068-03|Megachile frigida|COI-5P|FJ582309	S
BEEMH014-06|Megachile frigida|COI-5P|MG352134	S
BEEMH173-06|Megachile frigida|COI-5P|MG355058	S
SSWLE5580-13|Megachile frigida|COI-5P|KM557578	S
BBHYA564-12|Megachile frugalis pseudofrugalis|COI-5P	S
BEECB731-07|Megachile frugalis pseudofrugalis|COI-5P	S
BEECB813-07|Megachile frugalis pseudofrugalis|COI-5P	S
BEECB815-07|Megachile frugalis pseudofrugalis|COI-5P	S
BEECB814-07|Megachile frugalis pseudofrugalis|COI-5P	S
BEECA140-06|Megachile frugalis|COI-5P	S
BEECA139-06|Megachile frugalis|COI-5P	S
BEECB660-07|Hoplitis fulgida|COI-5P	S
BEECB662-07|Hoplitis fulgida|COI-5P	S
BEECB659-07|Hoplitis fulgida|COI-5P	S
BEECB661-07|Hoplitis fulgida|COI-5P	S
BBHYL360-10|Hoplitis fulgida|COI-5P|JN293798	S
BBHYI931-10|Hoplitis fulgida|COI-5P|JN292771	S
SSBAD6193-13|Hoplitis fulgida|COI-5P|KM564280	S
BEECA277-06|Hoplitis fulgida|COI-5P	S
BEECA252-06|Hoplitis fulgida|COI-5P	S
SSWLE2270-13|Hoplitis fulgida|COI-5P|KM555711	S
CNEID3374-12|Coelioxys funeraria|COI-5P|KM564509	S
HCBNS153-03|Coelioxys funeraria|COI-5P|FJ582186	S
HCBNS152-03|Coelioxys funeraria|COI-5P|FJ582185	S
HCBNS154-03|Coelioxys funeraria|COI-5P|FJ582187	S
HDBNS066-03|Coelioxys funeraria|COI-5P|FJ582184	S
HDBNS065-03|Coelioxys funeraria|COI-5P|FJ582183	S
BEECC963-09|Osmia gabrielis|COI-5P	S
BEECC962-09|Osmia gabrielis|COI-5P	S
BEECC490-08|Osmia gabrielis|COI-5P	S
FBAPC542-11|Osmia gallarum|COI-5P|KJ839662	S
GBACU1231-12|Osmia gallarum|COI-5P|KJ838054	S
FBAPD130-11|Osmia gallarum|COI-5P|KJ836777	S
GBACU3696-13|Osmia gallarum|COI-5P|KJ836964	S
FBAPD129-11|Osmia gallarum|COI-5P|KJ837631	S
FBAPC541-11|Osmia gallarum|COI-5P|KJ837307	S
FBAPD127-11|Osmia gallarum|COI-5P|KJ839020	S
GBACU3697-13|Osmia gallarum|COI-5P|KJ837133	S
GBACU3698-13|Osmia gallarum|COI-5P|KJ838466	S
GBACU3695-13|Osmia gallarum|COI-5P|KJ839145	S
FBAPB682-09|Osmia gallarum|COI-5P|HQ948079	S
FBAPB683-09|Osmia gallarum|COI-5P|HQ948080	S
FBAPB680-09|Osmia gallarum|COI-5P|KJ838469	S
FBAPC364-10|Osmia gallarum|COI-5P|KJ839266	S
FBAPC367-10|Osmia gallarum|COI-5P|KJ838796	S
FBAPC366-10|Osmia gallarum|COI-5P|KJ837521	S
FBAPC365-10|Osmia gallarum|COI-5P|KJ839274	S
BEECC986-09|Osmia gaudiosa|COI-5P	S
BEECC987-09|Osmia gaudiosa|COI-5P	S
BEECB431-07|Osmia gaudiosa|COI-5P	S
BEECB430-07|Osmia gaudiosa|COI-5P	S
BEECC1162-09|Megachile gemula cressonii|COI-5P	S
BEECC141-08|Megachile gemula fulvogemula|COI-5P	S
BEECB1023-07|Megachile gemula fulvogemula|COI-5P	S
BUSA367-05|Megachile gemula|COI-5P	S
BCT001-06|Megachile gemula|COI-5P	S
ERPIR270-12|Megachile gemula|COI-5P|KR792049	S
BARSC508-16|Megachile gemula|COI-5P	S
JSJUN1410-11|Megachile gemula|COI-5P|KR796246	S
UPOLB830-09|Megachile gemula|COI-5P	S
HCBNS139-03|Megachile gemula|COI-5P|FJ582314	S
HCBNS140-03|Megachile gemula|COI-5P|FJ582312	S
CNRME1871-12|Megachile gemula|COI-5P|KM562651	S
GMGSK159-12|Megachile gemula|COI-5P	S
CNTID5234-15|Megachile gemula|COI-5P|MG501828	S
HCBNS232-03|Megachile gemula|COI-5P|FJ582313	S
FBAPB388-09|Megachile genalis|COI-5P|HM401106	S
GBSYM2317-13|Megachile genalis|COI-5P|KJ839253	S
FBAPB391-09|Megachile genalis|COI-5P|HQ948054	S
FBAPB389-09|Megachile genalis|COI-5P|HM901854	S
FBAPB390-09|Megachile genalis|COI-5P|HM901855	S
BEECC172-08|Megachile gentilis|COI-5P|KF839671	S
BEECC1150-09|Megachile gentilis|COI-5P|KF839669	S
BEECC1152-09|Megachile gentilis|COI-5P|KF839670	S
BEECC393-08|Megachile georgica|COI-5P	S
ASGCB255-13|Osmia georgica|COI-5P	S
BEECC286-08|Osmia georgica|COI-5P	S
BEECC285-08|Osmia georgica|COI-5P	S
BEECA539-06|Coelioxys germana|COI-5P	S
BEECC974-09|Osmia giffardi|COI-5P	S
BEECC976-09|Osmia giffardi|COI-5P	S
BEECC975-09|Osmia giffardi|COI-5P	S
BEECC748-09|Coelioxys gilensis|COI-5P	S
JSYKA108-10|Megachile giliae|COI-5P|HM860285	S
JSYKA109-10|Megachile giliae|COI-5P|HM860286	S
JSYKA106-10|Megachile giliae|COI-5P|HM860283	S
JSYKA107-10|Megachile giliae|COI-5P|HM860284	S
BEECB1021-07|Osmia giliarum|COI-5P	S
BEECB1020-07|Osmia giliarum|COI-5P	S
BEECB428-07|Ashmeadiella gillettei|COI-5P	S
BEECB429-07|Ashmeadiella gillettei|COI-5P	S
GBMIN143394-18|Megachile giraudi|COI-5P|KX580349	S
FBAPC528-11|Megachile giraudi|COI-5P|KJ836416	S
FBAPC527-11|Megachile giraudi|COI-5P|KJ838549	S
LASNA615-08|Osmia glauca|COI-5P	S
BEECC997-09|Osmia glauca|COI-5P	S
BEECC996-09|Osmia glauca|COI-5P	S
LASNA520-08|Osmia glauca|COI-5P	S
SCRAP081-14|Othinosmia globicola|COI-5P	S
SCRAP033-14|Othinosmia globicola|COI-5P	S
SCRAP069-14|Othinosmia globicola|COI-5P	S
SCRAP057-14|Othinosmia globicola|COI-5P	S
SCRAP010-14|Othinosmia globicola|COI-5P	S
SCRAP093-14|Othinosmia globicola|COI-5P	S
SCRAP045-14|Othinosmia globicola|COI-5P	S
FBAPC723-11|Chelostoma grande|COI-5P|KJ836477	S
FBAPC722-11|Chelostoma grande|COI-5P|KJ839677	S
GBAH4619-09|Chelostoma grande|COI-5P|EU863067	S
SDBEE281-12|Osmia granulosa|COI-5P	S
BEECC739-09|Coelioxys grindeliae|COI-5P	S
BEECC740-09|Coelioxys grindeliae|COI-5P	S
BEECC741-09|Coelioxys grindeliae|COI-5P	S
BEECC738-09|Coelioxys grindeliae|COI-5P	S
BEECB668-07|Hoplitis grinnelli|COI-5P	S
BEECB669-07|Hoplitis grinnelli|COI-5P	S
BEECB843-07|Hoplitis grinnelli|COI-5P	S
BEECB729-07|Hoplitis grinnelli|COI-5P	S
BEECC886-09|Osmia grinnelli|COI-5P	S
BEECC887-09|Osmia grinnelli|COI-5P	S
GBMIN78087-17|Megachile griseopicta|COI-5P|KY072197	S
FBAPD941-11|Coelioxys haemorrhoa|COI-5P|KJ839282	S
GBAH4606-09|Chelostoma hellenicum|COI-5P|EU863080	S
GBMIN13968-13|Hoplitis hemisphaerica|COI-5P|JQ677506	S
GBMIN143395-18|Megachile hera|COI-5P|KX580350	S
GBMIN13941-13|Hoplitis hierichonica|COI-5P|JQ677489	S
GBMIN13924-13|Hoplitis hoggara|COI-5P|JQ677537	S
BEECA793-07|Megachile holosericea|COI-5P	S
BEECA794-07|Megachile holosericea|COI-5P	S
ABBOL052-15|Megachile humilis|COI-5P	S
BEECC251-08|Hoplitis hypocrita|COI-5P	S
BEECB468-07|Hoplitis hypocrita|COI-5P	S
BEECC470-08|Hoplitis hypocrita|COI-5P	S
GBMIN13964-13|Hoplitis hypocrita|COI-5P|JQ677522	S
GBMIN13934-13|Hoplitis idalia|COI-5P|JQ677507	S
ABBOL049-15|Megachile igniscopata|COI-5P	S
ABBOL048-15|Megachile igniscopata|COI-5P	S
SDBEE217-12|Anthidium illustre|COI-5P	S
GBMIN13920-13|Hoplitis incanescens|COI-5P|JQ677579	S
GBAH4605-09|Chelostoma incisulum|COI-5P|EU863081	S
GBMIN13919-13|Hoplitis incognita|COI-5P|JQ677581	S
FBHAP582-09|Coelioxys inermis|COI-5P|GU705918	S
FBAPB501-09|Coelioxys inermis|COI-5P|HM401149	S
BCHYM447-13|Coelioxys inermis|COI-5P|KJ839147	S
BEEEE176-15|Coelioxys inermis|COI-5P	S
NOBEE073-09|Coelioxys inermis|COI-5P	S
BBHEC083-09|Megachile inermis|COI-5P|GU690148	S
TTHYW142-08|Megachile inermis|COI-5P|KM566426	S
BBHEC163-09|Megachile inermis|COI-5P|GU690145	S
BBHYL291-10|Megachile inermis|COI-5P|JN293741	S
RRMFI4192-15|Megachile inermis|COI-5P|MG351952	S
DIAL294-06|Megachile inermis|COI-5P	S
HGPPH035-10|Megachile inermis|COI-5P|KR789444	S
BBHEC176-09|Megachile inermis|COI-5P|GU690146	S
BBHYL302-10|Megachile inermis|COI-5P|JN293751	S
TTHYW679-08|Megachile inermis|COI-5P|KM558908	S
BBHYL292-10|Megachile inermis|COI-5P|JN293742	S
DIAL295-06|Megachile inermis|COI-5P	S
TTHYW680-08|Megachile inermis|COI-5P|KM559022	S
TTHYW145-08|Megachile inermis|COI-5P|KM558207	S
TTHYW473-08|Megachile inermis|COI-5P|KM556972	S
UPOLB048-09|Megachile inermis|COI-5P	S
TTHYW651-08|Megachile inermis|COI-5P|KM557053	S
CNEID3221-12|Megachile inermis|COI-5P|KM560601	S
CNRMD397-12|Megachile inermis|COI-5P|KM563384	S
CNWBG3011-13|Megachile inermis|COI-5P|KM562446	S
CNRME758-12|Megachile inermis|COI-5P|KM557917	S
CNRMF552-12|Megachile inermis|COI-5P|KM569098	S
SSEIB12938-13|Megachile inermis|COI-5P|KM558064	S
SSEIB12934-13|Megachile inermis|COI-5P|KM569448	S
SSPAB9645-13|Megachile inermis|COI-5P|KM561651	S
BBHEC165-09|Megachile inermis|COI-5P|GU690144	S
BBHEC162-09|Megachile inermis|COI-5P|GU690143	S
TTHYW598-08|Megachile inermis|COI-5P|KM561374	S
TTHYW599-08|Megachile inermis|COI-5P|KM557918	S
HCBNS158-03|Megachile inermis|COI-5P|FJ582315	S
HCBNS159-03|Megachile inermis|COI-5P|FJ582316	S
HCBNS160-03|Megachile inermis|COI-5P|FJ582317	S
SSPAC032-13|Megachile inermis|COI-5P|KM555414	S
NOBEE058-09|Osmia inermis|COI-5P	S
NOBEE057-09|Osmia inermis|COI-5P	S
FBAPB686-09|Osmia inermis|COI-5P|HM401203	S
FBAPB711-09|Osmia inermis|COI-5P|HM401219	S
FBAPB687-09|Osmia inermis|COI-5P|HQ948082	S
FBAPB685-09|Osmia inermis|COI-5P|HQ948081	S
JSYKA164-10|Osmia inermis|COI-5P|HM860336	S
JSYKA165-10|Osmia inermis|COI-5P|HM860337	S
SSGBC7554-14|Osmia inermis|COI-5P|MG505392	S
HDBNS055-03|Osmia inermis|COI-5P|FJ582424	S
HDBNS056-03|Osmia inermis|COI-5P|FJ582423	S
BEECB696-07|Megachile inimica|COI-5P	S
BBHYA518-12|Megachile inimica|COI-5P	S
BEECB137-07|Megachile inimica|COI-5P	S
BEECB777-07|Megachile inimica|COI-5P	S
BEECB783-07|Megachile inimica|COI-5P	S
BEECB701-07|Megachile inimica|COI-5P	S
BEECB136-07|Megachile inimica|COI-5P	S
BEECB698-07|Megachile inimica|COI-5P	S
BEECB807-07|Megachile inimica|COI-5P	S
BEECB135-07|Megachile inimica|COI-5P	S
BEECB1018-07|Coelioxys insita|COI-5P	S
BEECB778-07|Coelioxys insita|COI-5P	S
BEECC527-08|Osmia inspergens|COI-5P	S
BEECC278-08|Osmia inspergens|COI-5P	S
BEECC277-08|Osmia inspergens|COI-5P	S
SSKOA1225-15|Osmia inspergens|COI-5P|MG505053	S
BEECA601-06|Osmia integra|COI-5P	S
HMBCH060-07|Osmia integra|COI-5P|JX829127	S
HMBCH065-07|Osmia integra|COI-5P|JX830696	S
HMBCH063-07|Osmia integra|COI-5P|JX831877	S
HMBCH057-07|Osmia integra|COI-5P|JX829883	S
BEECA074-06|Osmia integra|COI-5P	S
HMBCH067-07|Osmia integra|COI-5P|JX832677	S
BEECA602-06|Osmia integra|COI-5P	S
HMBCH026-07|Osmia integra|COI-5P|JX830276	S
HMBCH066-07|Osmia integra|COI-5P|JX830880	S
HMBCH025-07|Osmia integra|COI-5P|JX833432	S
BEECA435-06|Osmia integra|COI-5P	S
BEECA073-06|Osmia integra|COI-5P	S
BEECB493-07|Osmia integra|COI-5P	S
BEECB739-07|Osmia integra|COI-5P	S
BEECB740-07|Osmia integra|COI-5P	S
BEECC717-09|Osmia integra|COI-5P	S
LASNA536-08|Megachile integrella|COI-5P	S
GBMIN13975-13|Hoplitis israelica|COI-5P|JQ677490	S
GBAH0297-06|Osmia jacoti|COI-5P|AF250944	S
SCRAP018-14|Othinosmia jansei|COI-5P	S
SCRAP006-14|Othinosmia jansei|COI-5P	S
SCRAP042-14|Othinosmia jansei|COI-5P	S
SCRAP030-14|Othinosmia jansei|COI-5P	S
SCRAP089-14|Othinosmia jansei|COI-5P	S
GBMIN13958-13|Hoplitis jheringii|COI-5P|JQ677544	S
BBHYA960-12|Anthidium jocosum|COI-5P	S
SDBEE219-12|Anthidium jocosum|COI-5P	S
SDBEE218-12|Anthidium jocosum|COI-5P	S
BBHYA961-12|Anthidium jocosum|COI-5P	S
BEECA742-07|Anthidium jocosum|COI-5P	S
BEECB775-07|Paranthidium jugatorium|COI-5P	S
BEECB776-07|Paranthidium jugatorium|COI-5P	S
BEECB785-07|Paranthidium jugatorium|COI-5P	S
BEECC953-09|Osmia juxta|COI-5P	S
BEECC1199-09|Osmia juxta|COI-5P	S
BEECB362-07|Osmia juxta|COI-5P	S
BEECB361-07|Osmia juxta|COI-5P	S
BEECC468-08|Osmia juxta|COI-5P	S
BBHYL310-10|Osmia juxta|COI-5P|JN293759	S
BEECC1198-09|Osmia juxta|COI-5P	S
BEECC952-09|Osmia juxta|COI-5P	S
GBAH7443-13|Hoplitis karakalensis|COI-5P|JQ677568	S
LASNA545-08|Afranthidium KEN01|COI-5P	S
LASNA640-08|Afranthidium KEN01|COI-5P	S
BOWGF101-08|Megachile KEN01|COI-5P	S
BOWGF103-08|Megachile KEN03-Gronoceras sp.|COI-5P	S
BOWGF116-08|Megachile KEN05|COI-5P	S
BOWGF105-08|Megachile KEN05|COI-5P	S
BOWGF111-08|Megachile KEN06|COI-5P	S
BOWGF151-08|Megachile KEN08|COI-5P	S
BEECB432-07|Osmia kincaidii|COI-5P	S
ABBOL040-15|Megachile kobensis|COI-5P	S
ABBOL041-15|Megachile kobensis|COI-5P	S
BOWGF189-08|Megachile kohtaoensis|COI-5P	S
GBMIN78123-17|Pseudoanthidium kryzhanovskii|COI-5P|KY072449	S
ABBOL053-15|Megachile kyotensis|COI-5P	S
ASGCB240-13|Stelis labiata|COI-5P	S
BBHYA3298-12|Osmia laeta|COI-5P	S
BEECB448-07|Osmia laeta|COI-5P	S
TTHYW314-08|Osmia laeta|COI-5P|KM559802	S
BEECB447-07|Osmia laeta|COI-5P	S
BEECB358-07|Osmia laeta|COI-5P	S
SSGLA5013-15|Osmia laeta|COI-5P|MG499285	S
CNRVB279-15|Osmia laeta|COI-5P|KR929385	S
CNRVC101-15|Osmia laeta|COI-5P|KR934682	S
BEECB377-07|Osmia laeta|COI-5P	S
GMGML120-14|Megachile lagopoda|COI-5P	S
GMGML127-14|Megachile lagopoda|COI-5P	S
GMGML155-14|Megachile lagopoda|COI-5P	S
GMGML139-14|Megachile lagopoda|COI-5P	S
GMGMK173-14|Megachile lagopoda|COI-5P	S
GMGMK086-14|Megachile lagopoda|COI-5P	S
GMGMK145-14|Megachile lagopoda|COI-5P	S
GMGML113-14|Megachile lagopoda|COI-5P	S
GMGMK092-14|Megachile lagopoda|COI-5P	S
GMGML124-14|Megachile lagopoda|COI-5P	S
GMGMK083-14|Megachile lagopoda|COI-5P	S
GMGML144-14|Megachile lagopoda|COI-5P	S
GMGML141-14|Megachile lagopoda|COI-5P	S
GMGMK154-14|Megachile lagopoda|COI-5P	S
GMGMN007-14|Megachile lagopoda|COI-5P	S
GMGMN188-14|Megachile lagopoda|COI-5P	S
FBAPB394-09|Megachile lagopoda|COI-5P|HM401109	S
FBAPB395-09|Megachile lagopoda|COI-5P|HM401110	S
FBAPB392-09|Megachile lagopoda|COI-5P|HM401107	S
ABEE057-17|Megachile lagopoda|COI-5P	S
FBAPB393-09|Megachile lagopoda|COI-5P|HM401108	S
ABEE056-17|Megachile lagopoda|COI-5P	S
ABBOL054-15|Megachile lagopoda|COI-5P	S
GBAH4623-09|Chelostoma lamellum|COI-5P|EU863063	S
BEECC491-08|Megachile lanata|COI-5P	S
GBMIN143414-18|Megachile lanata|COI-5P|KX580369	S
BEECA031-06|Megachile lapponica|COI-5P	S
BEECB034-07|Megachile lapponica|COI-5P	S
FBAPB397-09|Megachile lapponica|COI-5P|HM401111	S
BEECA034-06|Megachile lapponica|COI-5P	S
BBHYL289-10|Megachile lapponica|COI-5P|JN293739	S
GBMIN143404-18|Megachile lapponica|COI-5P|KX580359	S
BEECA033-06|Megachile lapponica|COI-5P	S
BEECA032-06|Megachile lapponica|COI-5P	S
FBAPB399-09|Megachile lapponica|COI-5P|HQ948055	S
BEECA740-07|Trachusa larreae|COI-5P	S
BEECA739-07|Trachusa larreae|COI-5P	S
UPOLB641-09|Stelis lateralis|COI-5P	S
UPOLB773-09|Stelis lateralis|COI-5P	S
ASGCB242-13|Stelis lateralis|COI-5P	S
UPOLB809-09|Stelis lateralis|COI-5P	S
UPOLB810-09|Stelis lateralis|COI-5P	S
UPOLB639-09|Stelis lateralis|COI-5P	S
UPOLB775-09|Stelis lateralis|COI-5P	S
UPOLB862-09|Stelis lateralis|COI-5P	S
GBAH4604-09|Chelostoma laticaudum|COI-5P|EU863082	S
UPOLB036-09|Megachile latimanus|COI-5P	S
UPOLL222-09|Megachile latimanus|COI-5P	S
DIAL250-06|Megachile latimanus|COI-5P	S
UPOLB270-09|Megachile latimanus|COI-5P	S
UPOLL134-09|Megachile latimanus|COI-5P	S
DIAL232-06|Megachile latimanus|COI-5P	S
UPOLB686-09|Megachile latimanus|COI-5P	S
JSHYO686-11|Megachile latimanus|COI-5P|KR789877	S
UPOLL898-09|Megachile latimanus|COI-5P	S
UPOLL885-09|Megachile latimanus|COI-5P	S
DIAL281-06|Megachile latimanus|COI-5P	S
UPOLL918-09|Megachile latimanus|COI-5P	S
UPOLB026-09|Megachile latimanus|COI-5P	S
UPOLB256-09|Megachile latimanus|COI-5P	S
UPOLL914-09|Megachile latimanus|COI-5P	S
DIAL251-06|Megachile latimanus|COI-5P	S
UPOLL929-09|Megachile latimanus|COI-5P	S
UPOLL783-09|Megachile latimanus|COI-5P	S
UPOLB190-09|Megachile latimanus|COI-5P	S
UPOLB126-09|Megachile latimanus|COI-5P	S
UPOLL946-09|Megachile latimanus|COI-5P	S
UPOLL696-09|Megachile latimanus|COI-5P	S
UPOLB078-09|Megachile latimanus|COI-5P	S
UPOLL400-09|Megachile latimanus|COI-5P	S
UPOLL735-09|Megachile latimanus|COI-5P	S
UPOLL782-09|Megachile latimanus|COI-5P	S
UPOLL883-09|Megachile latimanus|COI-5P	S
UPOLL858-09|Megachile latimanus|COI-5P	S
UPOLL882-09|Megachile latimanus|COI-5P	S
UPOLL695-09|Megachile latimanus|COI-5P	S
UPOLL523-09|Megachile latimanus|COI-5P	S
UPOLL830-09|Megachile latimanus|COI-5P	S
DIAL093-06|Megachile latimanus|COI-5P	S
UPOLL189-09|Megachile latimanus|COI-5P	S
UPOLB024-09|Megachile latimanus|COI-5P	S
BCT018-06|Megachile latimanus|COI-5P	S
BUSA114-05|Megachile latimanus|COI-5P	S
HDBNS067-03|Megachile latimanus|COI-5P|FJ582318	S
HCBNS218-03|Megachile latimanus|COI-5P|FJ582319	S
BEEMH315-06|Megachile latimanus|COI-5P|MG349970	S
BEEMH312-06|Megachile latimanus|COI-5P|MG348361	S
BEEMH314-06|Megachile latimanus|COI-5P|MG356080	S
UPOLL025-09|Megachile latimanus|COI-5P	S
UPOLL036-09|Megachile latimanus|COI-5P	S
FBAPD320-11|Osmia latreillei|COI-5P|KJ837570	S
FBAPD321-11|Osmia latreillei|COI-5P|KJ839409	S
FBAPD319-11|Osmia latreillei|COI-5P|KJ838588	S
FBAPD318-11|Osmia latreillei|COI-5P|KJ837549	S
ABEE217-17|Megachile leachella|COI-5P	S
ABEE058-17|Megachile leachella|COI-5P	S
FBAPB400-09|Megachile leachella|COI-5P|HM401112	S
FBAPB402-09|Megachile leachella|COI-5P|HM401114	S
FBAPB403-09|Megachile leachella|COI-5P|HM401115	S
FBAPB401-09|Megachile leachella|COI-5P|HM401113	S
GBACU328-12|Megachile leachella|COI-5P|KJ839503	S
GBACU329-12|Megachile leachella|COI-5P|KJ836704	S
BEEEE072-15|Osmia leaiana|COI-5P|KT074075	S
FBAPB688-09|Osmia leaiana|COI-5P|KJ838419	S
FBAPB716-09|Osmia leaiana|COI-5P|HQ948084	S
FBAPB689-09|Osmia leaiana|COI-5P|HM401204	S
BCHYM1497-13|Osmia leaiana|COI-5P|KJ838962	S
FBHAP572-09|Osmia leaiana|COI-5P|GU705911	S
FBAPC376-10|Osmia leaiana|COI-5P|KJ837902	S
ABEE158-17|Osmia leaiana|COI-5P	S
DIAL284-06|Heriades leavitti|COI-5P	S
DIAL298-06|Heriades leavitti|COI-5P	S
OPPOE313-17|Heriades leavitti|COI-5P	S
UPOLL423-09|Heriades leavitti|COI-5P	S
DIAL293-06|Heriades leavitti|COI-5P	S
GBCHA1073-13|Hoplitis lepeletieri|COI-5P|KJ838874	S
GBCHA1071-13|Hoplitis lepeletieri|COI-5P|KJ837451	S
FBAPB691-09|Hoplitis lepeletieri|COI-5P|KJ837257	S
FBAPB692-09|Hoplitis lepeletieri|COI-5P|HQ948083	S
FBAPB690-09|Hoplitis lepeletieri|COI-5P|KJ839393	S
GBMIN143396-18|Megachile leucomalla|COI-5P|KX580351	S
GMGMA1005-14|Hoplitis leucomelana|COI-5P	S
GMGMA1122-14|Hoplitis leucomelana|COI-5P	S
GMGML1433-14|Hoplitis leucomelana|COI-5P	S
GMGMC725-14|Hoplitis leucomelana|COI-5P	S
GMGML1466-14|Hoplitis leucomelana|COI-5P	S
FBAPC867-11|Hoplitis leucomelana|COI-5P|KJ839627	S
GBACU3271-13|Hoplitis leucomelana|COI-5P|KJ838949	S
FBAPC958-11|Hoplitis leucomelana|COI-5P|KJ838263	S
GBACU1151-12|Hoplitis leucomelana|COI-5P|KJ836899	S
GBACU2299-13|Hoplitis leucomelana|COI-5P|KJ838639	S
GBACU3270-13|Hoplitis leucomelana|COI-5P|KJ836686	S
GBACU3272-13|Hoplitis leucomelana|COI-5P|KJ838453	S
FBAPC735-11|Hoplitis leucomelana|COI-5P|KJ837884	S
FBAPB695-09|Hoplitis leucomelana|COI-5P|HM401205	S
FBAPC868-11|Hoplitis leucomelana|COI-5P|KJ837465	S
FBAPC956-11|Hoplitis leucomelana|COI-5P|KJ839578	S
GBACU1230-12|Hoplitis leucomelana|COI-5P|KJ837481	S
FBAPC869-11|Hoplitis leucomelana|COI-5P|KJ838801	S
GBACU1229-12|Hoplitis leucomelana|COI-5P|KJ838725	S
FBAPC662-11|Hoplitis leucomelana|COI-5P|KJ837316	S
FBAPB694-09|Hoplitis leucomelana|COI-5P|KJ838726	S
FBAPC870-11|Hoplitis leucomelana|COI-5P|KJ836652	S
FBHAP573-09|Hoplitis leucomelana|COI-5P|KJ839585	S
GBACU3705-13|Hoplitis leucomelana|COI-5P|KJ838958	S
FBAPC736-11|Hoplitis leucomelana|COI-5P|KJ838438	S
FBAPC957-11|Hoplitis leucomelana|COI-5P|KJ836500	S
FBAPC959-11|Hoplitis leucomelana|COI-5P|KJ837382	S
FBAPC663-11|Hoplitis leucomelana|COI-5P|KJ837582	S
ABEE196-17|Hoplitis leucomelana|COI-5P	S
GBCHA1053-13|Hoplitis leucomelana|COI-5P|KJ838460	S
ABEE148-17|Hoplitis leucomelana|COI-5P	S
GBMIN143384-18|Megachile leucospilura|COI-5P|KX580339	S
GBMIN78122-17|Osmia lignaria|COI-5P|KT123239	S
GBMIN78121-17|Osmia lignaria|COI-5P|KT123240	S
RRMFE3077-15|Osmia lignaria|COI-5P|KT700919	S
RRNGS205-16|Osmia lignaria|COI-5P	S
HCBNS185-03|Osmia lignaria|COI-5P|FJ582426	S
HCBNS184-03|Osmia lignaria|COI-5P|FJ582425	S
BEECA198-06|Osmia lignaria|COI-5P	S
GBMIN143405-18|Megachile ligniseca|COI-5P|KX580360	S
FBAPB404-09|Megachile ligniseca|COI-5P|HM401116	S
FBACB697-11|Megachile ligniseca|COI-5P|KJ837854	S
GBACU1130-12|Megachile ligniseca|COI-5P|KJ838291	S
FBHAP347-09|Megachile ligniseca|COI-5P|GU705995	S
FBHAP348-09|Megachile ligniseca|COI-5P|GU705994	S
GMGMA457-14|Megachile ligniseca|COI-5P	S
ABBOL055-15|Megachile ligniseca|COI-5P	S
ABEE059-17|Megachile ligniseca|COI-5P	S
FBHAP349-09|Megachile ligniseca|COI-5P|GU705993	S
GMGML106-14|Megachile ligniseca|COI-5P	S
GMGML118-14|Megachile ligniseca|COI-5P	S
BEEEE061-15|Megachile ligniseca|COI-5P|KT074064	S
ABEE076-17|Hoplosmia ligurica|COI-5P	S
BEECB467-07|Megachile lippiae|COI-5P|KF839673	S
BEECC791-09|Megachile lippiae|COI-5P|KF839675	S
BEECB466-07|Megachile lippiae|COI-5P|KF839674	S
BBHYA892-12|Megachile lippiae|COI-5P	S
BBHYA1224-12|Megachile lippiae|COI-5P	S
BEECC940-09|Megachile lippiae|COI-5P|KF839676	S
BEECB829-07|Megachile lippiae|COI-5P|KF839672	S
BBHYA511-12|Megachile lippiae|COI-5P	S
BBHYA509-12|Megachile lippiae|COI-5P	S
BBHYA514-12|Megachile lippiae|COI-5P	S
BEECA477-06|Megachile lippiae|COI-5P	S
BEECB125-07|Lithurgopsis littoralis|COI-5P	S
GBMIN13967-13|Hoplitis longispina|COI-5P|JQ677508	S
BEECB742-07|Osmia longula|COI-5P	S
BEECB349-07|Osmia longula|COI-5P	S
BEECB741-07|Osmia longula|COI-5P	S
FBAPD945-11|Anthidium loti|COI-5P|KJ838786	S
FBAPD943-11|Anthidium loti|COI-5P|KJ836898	S
FBAPD944-11|Anthidium loti|COI-5P|KJ837741	S
FBAPD946-11|Anthidium loti|COI-5P|KJ838313	S
GBGST082-13|Anthidium loti|COI-5P|KJ838221	S
FBAPB698-09|Hoplitis loti|COI-5P|HM401208	S
GBCHA1074-13|Hoplitis loti|COI-5P|KJ836582	S
FBAPB699-09|Hoplitis loti|COI-5P|HM401209	S
FBAPC737-11|Hoplitis loti|COI-5P|KJ836568	S
GBCHA1076-13|Hoplitis loti|COI-5P|KJ836682	S
GBCHA1075-13|Hoplitis loti|COI-5P|KJ839093	S
GBCHA1072-13|Hoplitis loti|COI-5P|KJ839250	S
FBAPB696-09|Hoplitis loti|COI-5P|HM401206	S
BCHYM1498-13|Hoplitis loti|COI-5P|KJ839437	S
FBAPB697-09|Hoplitis loti|COI-5P|HM401207	S
GBMIN13957-13|Hoplitis loti|COI-5P|JQ677546	S
BEECB663-07|Hoplitis louisae|COI-5P	S
MAMTK123-12|Osmia ma04|COI-5P|KY831625	S
MAMTK571-12|Osmia ma04|COI-5P|KY837445	S
GMRMQ001-14|Anthidium maculosum|COI-5P	S
BEECC150-08|Anthidium maculosum|COI-5P	S
BEECC949-09|Osmia malina|COI-5P	S
BEECC948-09|Osmia malina|COI-5P	S
BEECB802-07|Osmia malina|COI-5P	S
BEECB804-07|Osmia malina|COI-5P	S
FBAPB503-09|Coelioxys mandibularis|COI-5P|KJ839171	S
FBAPC779-11|Coelioxys mandibularis|COI-5P|KJ838308	S
FBAPC766-11|Coelioxys mandibularis|COI-5P|KJ837700	S
FBAPC803-11|Coelioxys mandibularis|COI-5P|KJ837533	S
FBAPC804-11|Coelioxys mandibularis|COI-5P|KJ838163	S
FBAPC770-11|Coelioxys mandibularis|COI-5P|KJ839419	S
FBAPC806-11|Coelioxys mandibularis|COI-5P|KJ838243	S
FBAPC349-10|Coelioxys mandibularis|COI-5P|KJ837303	S
FBAPC763-11|Coelioxys mandibularis|COI-5P|KJ836877	S
FBAPC767-11|Coelioxys mandibularis|COI-5P|KJ837807	S
FBAPC768-11|Coelioxys mandibularis|COI-5P|KJ837494	S
FBHAP369-09|Coelioxys mandibularis|COI-5P|KJ836836	S
FBHAP583-09|Coelioxys mandibularis|COI-5P|KJ839260	S
FBAPD293-11|Coelioxys mandibularis|COI-5P|KJ839664	S
FBAPB504-09|Coelioxys mandibularis|COI-5P|KJ838504	S
FBAPC805-11|Coelioxys mandibularis|COI-5P|KJ836863	S
FBAPC765-11|Coelioxys mandibularis|COI-5P|KJ836707	S
GBMIN13922-13|Hoplitis manicata|COI-5P|JQ677547	S
GBMIN143378-18|Megachile manicata|COI-5P|KX580333	S
GBLGC036-12|Anthidium manicatum|COI-5P|KJ838557	S
GBLGC037-12|Anthidium manicatum|COI-5P|KJ838703	S
FBHAP373-09|Anthidium manicatum|COI-5P|GU706005	S
BEECB559-07|Anthidium manicatum|COI-5P	S
GBACU2334-13|Anthidium manicatum|COI-5P|KJ837004	S
BBHYL311-10|Anthidium manicatum|COI-5P|JN293760	S
JSHYN291-11|Anthidium manicatum|COI-5P|KR788635	S
UPOLB115-09|Anthidium manicatum|COI-5P	S
NZHYM434-10|Anthidium manicatum|COI-5P|JN281386	S
JSHYO722-11|Anthidium manicatum|COI-5P|KR797104	S
BEECB558-07|Anthidium manicatum|COI-5P	S
JSHYO677-11|Anthidium manicatum|COI-5P|KR793321	S
BEECB563-07|Anthidium manicatum|COI-5P	S
UPOLB826-09|Anthidium manicatum|COI-5P	S
UPOLB224-09|Anthidium manicatum|COI-5P	S
UPOLB141-09|Anthidium manicatum|COI-5P	S
BEECA144-06|Anthidium manicatum|COI-5P	S
UPOLB014-09|Anthidium manicatum|COI-5P	S
UPOLB792-09|Anthidium manicatum|COI-5P	S
UPOLB827-09|Anthidium manicatum|COI-5P	S
BEECA145-06|Anthidium manicatum|COI-5P	S
NZHYM435-10|Anthidium manicatum|COI-5P|JN281387	S
UPOLL812-09|Anthidium manicatum|COI-5P	S
UPOLB925-09|Anthidium manicatum|COI-5P	S
BEECC145-08|Anthidium manicatum|COI-5P	S
UPOLB046-09|Anthidium manicatum|COI-5P	S
BUSA150-05|Anthidium manicatum|COI-5P	S
UPOLL752-09|Anthidium manicatum|COI-5P	S
GBACU2333-13|Anthidium manicatum|COI-5P|KJ838277	S
FBAPC738-11|Anthidium manicatum|COI-5P|KJ839261	S
FBAPC739-11|Anthidium manicatum|COI-5P|KJ837372	S
UPOLB853-09|Anthidium manicatum|COI-5P	S
BEECC284-08|Anthidium manicatum|COI-5P	S
BEECC146-08|Anthidium manicatum|COI-5P	S
BCHYM445-13|Anthidium manicatum|COI-5P|KJ837766	S
UPOLB068-09|Anthidium manicatum|COI-5P	S
FBHAP374-09|Anthidium manicatum|COI-5P|GU706007	S
MBION782-14|Anthidium manicatum|COI-5P|KR797236	S
MBIOF1888-13|Anthidium manicatum|COI-5P|KR786755	S
MBIOG006-13|Anthidium manicatum|COI-5P|KR799084	S
MBIOI1014-13|Anthidium manicatum|COI-5P|KR805595	S
MBIOF1892-13|Anthidium manicatum|COI-5P|KR785955	S
MBIOF1890-13|Anthidium manicatum|COI-5P|KR803996	S
MBIOF1895-13|Anthidium manicatum|COI-5P|KR792045	S
RBINA5009-13|Anthidium manicatum|COI-5P|KR891044	S
SMTPD5173-13|Anthidium manicatum|COI-5P|KR877520	S
ABEE131-17|Anthidium manicatum|COI-5P	S
BEEMH094-06|Anthidium manicatum|COI-5P|MG353957	S
BEEMH049-06|Anthidium manicatum|COI-5P|MG350833	S
BEEMH051-06|Anthidium manicatum|COI-5P|MG353182	S
BEEMH047-06|Anthidium manicatum|COI-5P|MG350468	S
BEEMH053-06|Anthidium manicatum|COI-5P|MG351505	S
BEEMH052-06|Anthidium manicatum|COI-5P|MG347041	S
BEEMH048-06|Anthidium manicatum|COI-5P|MG349978	S
BEEMH123-06|Anthidium manicatum|COI-5P|MG349315	S
BEEMH050-06|Anthidium manicatum|COI-5P|MG349387	S
MBIOH416-13|Anthidium manicatum|COI-5P|KR797837	S
MBIOH410-13|Anthidium manicatum|COI-5P|KR807574	S
MBIOJ022-13|Anthidium manicatum|COI-5P|KR801590	S
MBIOF1891-13|Anthidium manicatum|COI-5P|KR801073	S
BEEEE022-15|Anthidium manicatum subsp. nigrithorax|COI-5P|KT074025	S
BEEEE107-15|Anthidium manicatum subsp. nigrithorax|COI-5P	S
GBACU1125-12|Anthidium manicatum|COI-5P|KJ837370	S
GBACU1265-12|Anthidium manicatum|COI-5P|KJ839077	S
GBACU1124-12|Anthidium manicatum|COI-5P|KJ839137	S
BEECC130-08|Megachile manifesta|COI-5P	S
BEECC134-08|Megachile manifesta|COI-5P	S
BUSA051-05|Megachile manifesta|COI-5P	S
GBMIN13956-13|Hoplitis marchali|COI-5P|JQ677548	S
GBAH4603-09|Chelostoma marginatum|COI-5P|EU863083	S
FBAPB405-09|Megachile maritima|COI-5P|HM401117	S
GBACU1136-12|Megachile maritima|COI-5P|KJ838496	S
GBACU1135-12|Megachile maritima|COI-5P|KJ838597	S
FBAPB408-09|Megachile maritima|COI-5P|HM401120	S
GBACU1137-12|Megachile maritima|COI-5P|KJ839385	S
FBACB695-11|Megachile maritima|COI-5P|KJ836873	S
GBACU1139-12|Megachile maritima|COI-5P|KJ838840	S
FBAPB407-09|Megachile maritima|COI-5P|HM401119	S
FBAPB406-09|Megachile maritima|COI-5P|HM401118	S
GBACU1138-12|Megachile maritima|COI-5P|KJ839766	S
GBMIN143420-18|Megachile maritima|COI-5P|KX580375	S
FBACB696-11|Megachile maritima|COI-5P|KJ839348	S
IBBP145-10|Megachile maritima|COI-5P|JQ909789	S
IBBP146-10|Megachile maritima|COI-5P|JQ909788	S
JSYKA120-10|Osmia maritima|COI-5P|HM860295	S
FBAPB700-09|Osmia melanogaster|COI-5P|HM401210	S
FBAPB701-09|Osmia melanogaster|COI-5P|HM401211	S
CNSIB878-15|Megachile melanophaea|COI-5P|KR934360	S
CNSIC3011-15|Megachile melanophaea|COI-5P|MG501568	S
SSGBC10043-14|Megachile melanophaea|COI-5P|MG501154	S
CNSIB882-15|Megachile melanophaea|COI-5P|KR934584	S
SSGBC2659-14|Megachile melanophaea|COI-5P|MG498952	S
CNSIA757-15|Megachile melanophaea|COI-5P|KR929006	S
CNSIB876-15|Megachile melanophaea|COI-5P|KR924483	S
CNMIE855-14|Megachile melanophaea|COI-5P|KR421580	S
CNSIC3006-15|Megachile melanophaea|COI-5P|MG499981	S
CNSIB092-15|Megachile melanophaea|COI-5P|KR930595	S
CNSIB093-15|Megachile melanophaea|COI-5P|KR929906	S
CNSIB880-15|Megachile melanophaea|COI-5P|KR932686	S
CNSIC3018-15|Megachile melanophaea|COI-5P|MG501725	S
CNSIC3009-15|Megachile melanophaea|COI-5P|MG505572	S
CNSIB871-15|Megachile melanophaea|COI-5P|KR926749	S
CNSIA756-15|Megachile melanophaea|COI-5P|KR928014	S
CNSIA754-15|Megachile melanophaea|COI-5P|KR932909	S
CNSIA755-15|Megachile melanophaea|COI-5P|KR932669	S
CNSIC3012-15|Megachile melanophaea|COI-5P|MG503897	S
CNSIC3008-15|Megachile melanophaea|COI-5P|MG502609	S
CNSIB870-15|Megachile melanophaea|COI-5P|KR933395	S
CNSIC3017-15|Megachile melanophaea|COI-5P|MG503284	S
CNSIB872-15|Megachile melanophaea|COI-5P|KR934380	S
CNSIB873-15|Megachile melanophaea|COI-5P|KR929582	S
CNSIC023-15|Megachile melanophaea|COI-5P|MG504624	S
HCBNS166-03|Megachile melanophaea|COI-5P|FJ582320	S
HCBNS167-03|Megachile melanophaea|COI-5P|FJ582321	S
BBHYL276-10|Megachile melanophaea|COI-5P|JN293727	S
BBHYL278-10|Megachile melanophaea|COI-5P|JN293728	S
BEECA809-07|Megachile melanophaea|COI-5P	S
BBHYL299-10|Megachile melanophaea|COI-5P|JN293748	S
BBHYL285-10|Megachile melanophaea|COI-5P|JN293735	S
BEECC471-08|Megachile melanophaea|COI-5P	S
TTHYW443-08|Megachile melanophaea|COI-5P|KM566604	S
CNSIB877-15|Megachile melanophaea|COI-5P|KR929599	S
CNWLE2381-12|Megachile melanophaea|COI-5P|KM565560	S
HPPPI1321-13|Megachile melanophaea|COI-5P|KR786310	S
HPPPC106-13|Megachile melanophaea|COI-5P|KR790048	S
HPPPI1322-13|Megachile melanophaea|COI-5P|KR806537	S
HPPPI1444-13|Megachile melanophaea|COI-5P|KR793093	S
CNSIC024-15|Megachile melanophaea|COI-5P|MG504217	S
CNSIA759-15|Megachile melanophaea|COI-5P|KR926184	S
CNSIB874-15|Megachile melanophaea|COI-5P|KR932131	S
CNSIC3016-15|Megachile melanophaea|COI-5P|MG498794	S
CNMIF2111-14|Megachile melanophaea|COI-5P|KR409785	S
HPPPE1604-13|Megachile melanophaea|COI-5P|KR797770	S
CNSIC3015-15|Megachile melanophaea|COI-5P|MG504538	S
CNSIB875-15|Megachile melanophaea|COI-5P|KR931225	S
CNSIB881-15|Megachile melanophaea|COI-5P|KR926049	S
CNSIB094-15|Megachile melanophaea|COI-5P|KR928481	S
CNSID3396-15|Megachile melanophaea|COI-5P|KR934684	S
NGNAD1559-13|Megachile melanophaea|COI-5P|KR876791	S
CNWBG2438-13|Megachile melanophaea|COI-5P|KM566739	S
BEECA470-06|Megachile melanophaea|COI-5P	S
TTHYW056-08|Megachile melanophaea|COI-5P|KM565325	S
ABEE061-17|Megachile melanopyga|COI-5P	S
ABEE060-17|Megachile melanopyga|COI-5P	S
FBAPB409-09|Megachile melanopyga|COI-5P|HM401121	S
GBACU3590-13|Megachile melanopyga|COI-5P|KJ838034	S
GBACU3594-13|Megachile melanopyga|COI-5P|KJ837851	S
FBAPB411-09|Megachile melanopyga|COI-5P|HM401122	S
FBAPB412-09|Megachile melanopyga|COI-5P|HM401123	S
FBAPB410-09|Megachile melanopyga|COI-5P|KJ838533	S
GBACU3521-13|Pseudoanthidium melanurum|COI-5P|KJ838568	S
BEECB1011-07|Megachile mellitarsis|COI-5P	S
BEECB1002-07|Megachile mellitarsis|COI-5P	S
BEECB826-07|Megachile mellitarsis|COI-5P	S
BEECA496-06|Megachile mendica|COI-5P	S
DIAL094-06|Megachile mendica|COI-5P|KF839677	S
DIAL253-06|Megachile mendica|COI-5P|KF839678	S
BEECC046-08|Megachile mendica|COI-5P|KF839679	S
BEECC045-08|Megachile mendica|COI-5P|KF839683	S
BEECA153-06|Megachile mendica|COI-5P|KF839681	S
DIAL297-06|Megachile mendica|COI-5P|KF839682	S
CNPPD003-12|Megachile mendica|COI-5P|MG349262	S
BEECA462-06|Megachile mendica|COI-5P	S
UPOLB368-09|Megachile mendica|COI-5P	S
BEECB1013-07|Coelioxys mesae|COI-5P	S
BEECB1014-07|Coelioxys mesae|COI-5P	S
BEECC742-09|Coelioxys mesae|COI-5P	S
BOFWM070-08|Paranthidium Mex 1|COI-5P	S
BOFWM065-08|Anthidiellum MEX01|COI-5P	S
BOFWM067-08|Anthidium MEX01|COI-5P	S
BOFWM068-08|Anthodioctes MEX01|COI-5P	S
BOFWM071-08|Trachusa MEX01|COI-5P	S
BOFWM066-08|Anthidiellum MEX02|COI-5P	S
BBHYA1441-12|Coelioxys mexicana|COI-5P	S
BBHYA530-12|Coelioxys mexicana|COI-5P	S
GMMCM099-15|Hypanthidium mexicanum|COI-5P	S
BOFWM069-08|Hypanthidium mexicanum|COI-5P	S
LASNA634-08|Pseudoanthidium MicraKEN1|COI-5P	S
LASNA539-08|Pseudoanthidium MicraKEN1|COI-5P	S
GBMIN13950-13|Hoplitis minima|COI-5P|JQ677590	S
FBAPB789-09|Stelis minima|COI-5P|JN281385	S
FBAPB788-09|Stelis minima|COI-5P|HQ948107	S
FBAPB787-09|Stelis minima|COI-5P|HQ948106	S
FBAPB786-09|Stelis minima|COI-5P|HQ948105	S
FBAPC347-10|Stelis minima|COI-5P|KJ837069	S
FBAPB793-09|Stelis minuta|COI-5P|HQ948108	S
FBAPB791-09|Stelis minuta|COI-5P|KJ838730	S
FBAPB790-09|Stelis minuta|COI-5P|KJ836959	S
FBAPC344-10|Stelis minuta|COI-5P|KJ836896	S
GBMIN13948-13|Protosmia minutula|COI-5P|JQ677594	S
GBAH4625-09|Protosmia minutula|COI-5P|EU863061	S
GBAH4602-09|Chelostoma minutum|COI-5P|EU863084	S
FBAPB704-09|Hoplitis mitis|COI-5P|HM401214	S
GBACU1211-12|Hoplitis mitis|COI-5P|KJ839570	S
GBACU1212-12|Hoplitis mitis|COI-5P|KJ836544	S
GBACU1213-12|Hoplitis mitis|COI-5P|KJ838545	S
FBAPB702-09|Hoplitis mitis|COI-5P|HM401212	S
FBAPB703-09|Hoplitis mitis|COI-5P|HM401213	S
FBHAP576-09|Hoplitis mitis|COI-5P|KJ836452	S
GBCHA1066-13|Hoplitis mitis|COI-5P|KJ836743	S
GBMIN13979-13|Hoplitis mitis|COI-5P|JQ677480	S
GBAH4618-09|Chelostoma mocsaryi|COI-5P|EU863068	S
GBMIN13933-13|Hoplitis mocsaryi|COI-5P|JQ677509	S
BEECA511-06|Coelioxys modesta|COI-5P	S
BCT004-06|Coelioxys modesta|COI-5P	S
NGNAS1424-14|Coelioxys moesta|COI-5P|KR895600	S
HCBNS149-03|Coelioxys moesta|COI-5P|FJ582189	S
HCBNS224-03|Coelioxys moesta|COI-5P|FJ582191	S
HCBNS223-03|Coelioxys moesta|COI-5P|FJ582190	S
HCBNS148-03|Coelioxys moesta|COI-5P|FJ582188	S
JSHYP759-12|Coelioxys moesta|COI-5P|KR797702	S
BEECB675-07|Coelioxys moesta|COI-5P	S
BBHYL406-10|Coelioxys moesta|COI-5P|JN293835	S
BEECA973-07|Coelioxys moesta|COI-5P	S
SCRAP034-14|Othinosmia monilifera|COI-5P	S
BEECC1232-09|Osmia montana quadriceps|COI-5P	S
BEECB344-07|Osmia montana montana|COI-5P	S
BEECB345-07|Osmia montana montana|COI-5P	S
BEECC1231-09|Osmia montana quadriceps|COI-5P	S
SDBEE282-12|Osmia montana quadriceps|COI-5P	S
BEECA251-06|Stelis montana|COI-5P	S
BEECA250-06|Stelis montana|COI-5P	S
BCHYM1455-13|Anthidium montanum|COI-5P|KJ837682	S
BCHYM1454-13|Anthidium montanum|COI-5P|KJ837694	S
BCHYM1456-13|Anthidium montanum|COI-5P|KJ839146	S
FBAPB452-09|Anthidium montanum|COI-5P|KJ838454	S
BEECB394-07|Stelis monticola|COI-5P	S
BBHYA512-12|Megachile montivaga|COI-5P	S
BBHYA864-12|Megachile montivaga|COI-5P	S
BEECA027-06|Megachile montivaga|COI-5P|FJ582322	S
NGAAC2088-14|Anthidium mormonum|COI-5P|MG353928	S
BEECB337-07|Anthidium mormonum|COI-5P	S
BEECB566-07|Anthidium mormonum|COI-5P	S
NGNAD1560-13|Anthidium mormonum|COI-5P|KR900337	S
GBACU3610-13|Hoplitis mucida|COI-5P|KJ837173	S
GBMIN13955-13|Hoplitis mucida|COI-5P|JQ677550	S
GBACU1152-12|Osmia mustelina|COI-5P|KJ838242	S
GBACU1644-12|Osmia mustelina|COI-5P|KJ839227	S
FBAPB708-09|Osmia mustelina|COI-5P|HM401218	S
FBAPB705-09|Osmia mustelina|COI-5P|HM401215	S
FBAPB707-09|Osmia mustelina|COI-5P|HM401217	S
FBAPB706-09|Osmia mustelina|COI-5P|HM401216	S
GBMIN143421-18|Gronoceras mutala|COI-5P|KX580376	S
GBMIN13940-13|Hoplitis mutica|COI-5P|JQ677491	S
BEECB380-07|Stelis n. sp. aff. Robertsoni|COI-5P	S
SCRAP031-14|Othinosmia namana|COI-5P	S
SCRAP007-14|Othinosmia namana|COI-5P	S
SCRAP019-14|Othinosmia namana|COI-5P	S
SCRAP067-14|Othinosmia namana|COI-5P	S
SCRAP066-14|Othinosmia namana|COI-5P	S
SCRAP043-14|Othinosmia namana|COI-5P	S
SCRAP078-14|Othinosmia namana|COI-5P	S
SCRAP055-14|Othinosmia namana|COI-5P	S
SCRAP090-14|Othinosmia namana|COI-5P	S
ABEE079-17|Pseudoanthidium nanum|COI-5P	S
ABEE078-17|Pseudoanthidium nanum|COI-5P	S
FBAPB795-09|Stelis nasuta|COI-5P|KJ837369	S
FBAPB796-09|Stelis nasuta|COI-5P|KJ836714	S
FBAPB794-09|Stelis nasuta|COI-5P|KJ839264	S
FBAPB797-09|Stelis nasuta|COI-5P|KJ839337	S
FBAPC339-10|Stelis nasuta|COI-5P|KJ839749	S
FBAPC606-11|Stelis nasuta|COI-5P|KJ839165	S
FBAPC605-11|Stelis nasuta|COI-5P|KJ838125	S
FBAPC607-11|Stelis nasuta|COI-5P|KJ836950	S
FBAPC608-11|Stelis nasuta|COI-5P|KJ839346	S
GBAH4617-09|Chelostoma nasutum|COI-5P|EU863069	S
GBMIN13965-13|Hoplitis negevensis|COI-5P|JQ677518	S
BOFTH405-09|Megachile nematocera|COI-5P	S
SRIRP004-15|Osmia nemoris|COI-5P	S
SRIRP005-15|Osmia nemoris|COI-5P	S
SRIRP006-15|Osmia nemoris|COI-5P	S
SRIRP003-15|Osmia nemoris|COI-5P	S
SRIRP007-15|Osmia nemoris|COI-5P	S
SRIRP009-15|Osmia nemoris|COI-5P	S
BEECB746-07|Osmia nemoris|COI-5P	S
BEECC1230-09|Osmia nemoris|COI-5P	S
GBMIN143408-18|Megachile nevadensis|COI-5P|KX580363	S
BBHYA889-12|Megachile newberryae|COI-5P	S
BEECC973-09|Osmia nifoata|COI-5P	S
BEECA077-06|Osmia nigrifrons|COI-5P	S
BEECA078-06|Osmia nigrifrons|COI-5P	S
CHUBE002-06|Osmia nigrifrons|COI-5P|JX828801	S
FBAPB413-09|Megachile nigriventris|COI-5P|HM401124	S
BCHYM421-13|Megachile nigriventris|COI-5P|KJ838506	S
FBHAP350-09|Megachile nigriventris|COI-5P|GU705992	S
FBHAP352-09|Megachile nigriventris|COI-5P|GU705999	S
FBHAP351-09|Megachile nigriventris|COI-5P|HM901925	S
BEECA183-06|Osmia nigriventris|COI-5P	S
BEECA075-06|Osmia nigriventris|COI-5P	S
BEECA076-06|Osmia nigriventris|COI-5P	S
JSYKA123-10|Osmia nigriventris|COI-5P|HM860298	S
JSYKA121-10|Osmia nigriventris|COI-5P|HM860296	S
JSYKA124-10|Osmia nigriventris|COI-5P|HM860299	S
[truncated: 1,756 more rows]

## Sheet: Colletidae BOLD Position 153
BOLD Sample	COI Position 153
AUSBS141-12|Leioproctus (Colletelus) sp. RLWB2|COI-5P	A
AUSBS142-12|Leioproctus (Colletelus) sp. RLWB2|COI-5P	A
AUSBS143-12|Leioproctus (Colletelus) sp. RLWB2|COI-5P	A
AUSBS140-12|Leioproctus (Colletelus) sp. RLWB2|COI-5P	A
AUSBS145-12|Leioproctus (Colletelus) sp. RLWB1|COI-5P	A
AUSBS139-12|Leioproctus (Colletelus) sp. RLWB1|COI-5P	A
AUSBS144-12|Leioproctus (Colletelus) sp. RLWB3|COI-5P	A
AUSBS130-12|Leioproctus (Euryglossidia) sp. RLWB1|COI-5P	A
GBAH1842-06|Colletes acutus|COI-5P|DQ085549	A
GBAH1841-06|Colletes acutus|COI-5P|DQ085548	A
NGNAX3133-14|Hylaeus aff coloradensis|COI-5P|KR885218	A
BEECB401-07|Hylaeus aff coloradensis sp2|COI-5P	A
BBHYI031-10|Hylaeus aff coloradensis|COI-5P|KR802897	A
BEECB400-07|Hylaeus aff coloradensis sp2|COI-5P	A
BEECB402-07|Hylaeus aff coloradensis sp2|COI-5P	A
BEECB637-07|Hylaeus aff coloradensis sp2|COI-5P	A
BEECB627-07|Hylaeus aff coloradensis sp2|COI-5P	A
BEECB626-07|Hylaeus aff coloradensis sp2|COI-5P	A
BEECB412-07|Hylaeus aff coloradensis sp1|COI-5P	A
BEEMH021-06|Hylaeus affinis|COI-5P|MG443661	A
BEEMH046-06|Hylaeus affinis|COI-5P|MG444023	A
BEEMH019-06|Hylaeus affinis|COI-5P|MG438550	A
BEEMH023-06|Hylaeus affinis|COI-5P|MG447652	A
BEEMH022-06|Hylaeus affinis|COI-5P|MG447387	A
BEEMH029-06|Hylaeus affinis|COI-5P|MG445489	A
BEEMH028-06|Hylaeus affinis|COI-5P|MG447891	A
BEEMH031-06|Hylaeus affinis|COI-5P|MG445215	A
BEEMH321-06|Hylaeus affinis|COI-5P|MG439214	A
BEEMH025-06|Hylaeus affinis|COI-5P|MG440027	A
BEEMH020-06|Hylaeus affinis|COI-5P|MG447269	A
BEEMH043-06|Hylaeus affinis|COI-5P|MG444330	A
BEEMH030-06|Hylaeus affinis|COI-5P|MG441134	A
BEECA803-07|Hylaeus affinis|COI-5P	A
BUSA115-05|Hylaeus affinis|COI-5P	A
TTHYW991-09|Hylaeus affinis/modestus|COI-5P|HM432902	A
CRHIA143-15|Hylaeus affinis/modestus|COI-5P|MG443142	A
HDBNS009-03|Hylaeus affinis/modestus|COI-5P|FJ582247	A
BEECC038-08|Hylaeus affinis/modestus|COI-5P|FJ582245	A
HDBNS010-03|Hylaeus affinis/modestus|COI-5P|FJ582248	A
BBHEC212-09|Hylaeus affinis/modestus|COI-5P|HM435862	A
BBHEC813-10|Hylaeus affinis/modestus|COI-5P|HM414429	A
HDBNS005-03|Hylaeus affinis/modestus|COI-5P|FJ582246	A
HYLHI004-08|Hylaeus akoko|COI-5P|FJ411517	A
HYQTB225-12|Hylaeus albonitens|COI-5P	A
HYQTB254-12|Hylaeus albonitens|COI-5P	A
HYQTB222-12|Hylaeus albonitens|COI-5P	A
HYQTB301-12|Hylaeus albonitens|COI-5P	A
HYQTB221-12|Hylaeus albonitens|COI-5P	A
HYQTB224-12|Hylaeus albonitens|COI-5P	A
AUSBS300-13|Hylaeus albonitens|COI-5P	A
AUSBS299-13|Hylaeus albonitens|COI-5P	A
GBAH7402-13|Hylaeus albonitens|COI-5P|JN578896	A
GBAH4194-09|Scrapter algoensis|COI-5P|DQ872698	A
LASNA699-08|Scrapter algoensis|COI-5P	A
LASNA793-08|Scrapter algoensis|COI-5P	A
GBACU2830-13|Hylaeus alpinus|COI-5P|KJ839318	A
FBAPB564-09|Hylaeus alpinus|COI-5P|HM401162	A
GBACU3572-13|Hylaeus alpinus|COI-5P|KJ838483	A
FBAPB562-09|Hylaeus alpinus|COI-5P|HM401160	A
GBACU2831-13|Hylaeus alpinus|COI-5P|KJ837153	A
FBAPB563-09|Hylaeus alpinus|COI-5P|HM401161	A
FBAPC504-11|Hylaeus alpinus|COI-5P|KJ839154	A
FBAPB565-09|Hylaeus alpinus|COI-5P|HQ948062	A
BEECB649-07|Colletes americanus|COI-5P	A
BEECB648-07|Colletes americanus|COI-5P	A
BEECB655-07|Colletes americanus|COI-5P	A
BEECB656-07|Colletes americanus|COI-5P	A
GBAH7140-10|Hylaeus andrenoides|COI-5P|FJ656057	A
HYLHS005-09|Hylaeus andrenoides|COI-5P	A
GBAH7141-10|Hylaeus andrenoides|COI-5P|FJ656056	A
HYLHS004-09|Hylaeus andrenoides|COI-5P	A
HYLHI007-08|Hylaeus andrenoides|COI-5P|FJ411518	A
HYLHS006-09|Hylaeus andrenoides|COI-5P	A
HYLHS003-09|Hylaeus andrenoides|COI-5P	A
HYLHI006-08|Hylaeus andrenoides|COI-5P|FJ411519	A
GBAH7142-10|Hylaeus andrenoides|COI-5P|FJ656055	A
HYLHS001-09|Hylaeus andrenoides|COI-5P	A
GBAH7139-10|Hylaeus andrenoides|COI-5P|FJ656058	A
HYLHS007-09|Hylaeus andrenoides|COI-5P	A
HYLHS002-09|Hylaeus andrenoides|COI-5P	A
HYLHI005-08|Hylaeus andrenoides|COI-5P|FJ411520	A
ABEE149-17|Hyaleus angustatus|COI-5P	A
ABEE098-17|Hyaleus angustatus|COI-5P	A
GBACU2842-13|Hylaeus angustatus|COI-5P|KJ836671	A
FBACB726-11|Hylaeus angustatus|COI-5P|KJ837383	A
FBACB727-11|Hylaeus angustatus|COI-5P|KJ838752	A
GBACU1108-12|Hylaeus angustatus|COI-5P|KJ839254	A
GBACU2843-13|Hylaeus angustatus|COI-5P|KJ838951	A
FBAPD563-11|Hylaeus angustatus|COI-5P|KJ839701	A
GBACU1110-12|Hylaeus angustatus|COI-5P|KJ837064	A
FBAPD560-11|Hylaeus angustatus|COI-5P|KJ836545	A
GBACU1224-12|Hylaeus angustatus|COI-5P|KJ838109	A
GBACU2845-13|Hylaeus angustatus|COI-5P|KJ837821	A
GBACU1107-12|Hylaeus angustatus|COI-5P|KJ839715	A
GBACU1109-12|Hylaeus angustatus|COI-5P|KJ837167	A
FBAPD562-11|Hylaeus angustatus|COI-5P|KJ839785	A
GBACU019-12|Hylaeus angustatus|COI-5P|KJ839103	A
GBACU2844-13|Hylaeus angustatus|COI-5P|KJ839714	A
FBAPC495-11|Hylaeus angustatus|COI-5P|KJ839514	A
FBAPC496-11|Hylaeus angustatus|COI-5P|KJ836886	A
GBACU018-12|Hylaeus angustatus|COI-5P|KJ836689	A
FBAPB566-09|Hylaeus angustatus|COI-5P|HM401163	A
FBAPD783-11|Hylaeus angustatus|COI-5P|KJ838295	A
GMGMA1445-14|Hylaeus angustatus|COI-5P	A
FBAPD561-11|Hylaeus angustatus|COI-5P|KJ839705	A
FBAPD565-11|Hylaeus angustatus|COI-5P|KJ838602	A
FBAPD564-11|Hylaeus angustatus|COI-5P|KJ837863	A
GMGMB1477-14|Hylaeus angustatus|COI-5P	A
FBAPB569-09|Hylaeus angustatus|COI-5P|KJ838555	A
ABEE100-17|Hylaeus angustatus|COI-5P	A
HYLHI011-08|Hylaeus angustulus|COI-5P|FJ411523	A
HYLHI012-08|Hylaeus angustulus|COI-5P|FJ411522	A
HYLHI013-08|Hylaeus angustulus|COI-5P|FJ411521	A
HYLHI010-08|Hylaeus angustulus|COI-5P|FJ411524	A
HYLHI009-08|Hylaeus angustulus|COI-5P|FJ411525	A
HYLHI008-08|Hylaeus angustulus|COI-5P|FJ411526	A
JSYKA597-10|Hylaeus annulatus|COI-5P|HQ569266	A
JSYKA606-10|Hylaeus annulatus|COI-5P|HQ569275	A
BBHYI551-10|Hylaeus annulatus|COI-5P|JN292548	A
JSYKA017-09|Hylaeus annulatus|COI-5P|HM395378	A
JSYKA599-10|Hylaeus annulatus|COI-5P|HQ569268	A
BBHYI558-10|Hylaeus annulatus|COI-5P|JN292555	A
JSYKA019-09|Hylaeus annulatus|COI-5P|HM395380	A
JSYKA601-10|Hylaeus annulatus|COI-5P|HQ569270	A
BBHYE122-10|Hylaeus annulatus|COI-5P|HM414629	A
BBHYI135-10|Hylaeus annulatus|COI-5P|JN292259	A
BBHYI550-10|Hylaeus annulatus|COI-5P|JN292547	A
JSYKA607-10|Hylaeus annulatus|COI-5P|HQ569276	A
BBHYJ424-10|Hylaeus annulatus|COI-5P|JN293022	A
JSYKA598-10|Hylaeus annulatus|COI-5P|HQ569267	A
JSYKA145-10|Hylaeus annulatus|COI-5P|HM860318	A
JSYKA185-10|Hylaeus annulatus|COI-5P|HM860357	A
JSYKA611-10|Hylaeus annulatus|COI-5P|HQ569280	A
BBHYJ577-10|Hylaeus annulatus|COI-5P|JF864411	A
JSYKA016-09|Hylaeus annulatus|COI-5P|HM395377	A
BBHYL349-10|Hylaeus annulatus|COI-5P|JN293787	A
JSYKA600-10|Hylaeus annulatus|COI-5P|HQ569269	A
JSYKA146-10|Hylaeus annulatus|COI-5P|HM860319	A
BEECB628-07|Hylaeus annulatus|COI-5P	A
TTHYW466-08|Hylaeus annulatus|COI-5P|KR887243	A
BBHYI933-10|Hylaeus annulatus|COI-5P|JN292773	A
JSYKA147-10|Hylaeus annulatus|COI-5P|HM860320	A
JSYKA148-10|Hylaeus annulatus|COI-5P|HM860321	A
BBHYJ964-10|Hylaeus annulatus|COI-5P|JF864597	A
JSYKA186-10|Hylaeus annulatus|COI-5P|HM860358	A
JSYKA188-10|Hylaeus annulatus|COI-5P|HM860360	A
JSYKA187-10|Hylaeus annulatus|COI-5P|HM860359	A
JSYKA149-10|Hylaeus annulatus|COI-5P|HM860322	A
JSYKA603-10|Hylaeus annulatus|COI-5P|HQ569272	A
JSYKA131-10|Hylaeus annulatus|COI-5P|HM860305	A
JSYKA602-10|Hylaeus annulatus|COI-5P|HQ569271	A
UPOLB444-09|Hylaeus annulatus|COI-5P	A
BBHYK023-10|Hylaeus annulatus|COI-5P|JF864645	A
JSYKA605-10|Hylaeus annulatus|COI-5P|HQ569274	A
BBHYK856-10|Hylaeus annulatus|COI-5P|JF864789	A
BBHYJ657-10|Hylaeus annulatus|COI-5P|JF864479	A
JSHYO466-11|Hylaeus annulatus|COI-5P|KR802369	A
JSYKA608-10|Hylaeus annulatus|COI-5P|HQ569277	A
JSYKA609-10|Hylaeus annulatus|COI-5P|HQ569278	A
BBHYI497-10|Hylaeus annulatus|COI-5P|JN292501	A
JSYKA610-10|Hylaeus annulatus|COI-5P|HQ569279	A
BBHYI934-10|Hylaeus annulatus|COI-5P|JN292774	A
JSYKA604-10|Hylaeus annulatus|COI-5P|HQ569273	A
BBHYI932-10|Hylaeus annulatus|COI-5P|JN292772	A
BBHYJ988-10|Hylaeus annulatus|COI-5P|JF864614	A
BBHYK022-10|Hylaeus annulatus|COI-5P|JF864644	A
BBHYL576-10|Hylaeus annulatus|COI-5P|JN293915	A
RRSSA4328-15|Hylaeus annulatus|COI-5P|MG446226	A
BBHYI496-10|Hylaeus annulatus|COI-5P|JN292500	A
BBHYK514-10|Hylaeus annulatus|COI-5P|JN293356	A
BBHYK475-10|Hylaeus annulatus|COI-5P|JN293328	A
TTHYW463-08|Hylaeus annulatus|COI-5P|KR888197	A
JSYKA189-10|Hylaeus annulatus|COI-5P|HM860361	A
BBHYM234-09|Hylaeus annulatus|COI-5P|HM374738	A
BBHYI559-10|Hylaeus annulatus|COI-5P|JN292556	A
TTHYW318-08|Hylaeus annulatus|COI-5P|KR890572	A
KNWRA087-12|Hylaeus annulatus|COI-5P|KU496760	A
CNWBX006-13|Hylaeus annulatus|COI-5P|KR803825	A
MBIOI1086-13|Hylaeus annulatus|COI-5P|KR793146	A
SSEIB4375-13|Hylaeus annulatus|COI-5P|KR876866	A
SSEIB5703-13|Hylaeus annulatus|COI-5P|KR878810	A
CNRME944-12|Hylaeus annulatus|COI-5P|KR806302	A
SSEIB4372-13|Hylaeus annulatus|COI-5P|KR877830	A
SSPAB5408-13|Hylaeus annulatus|COI-5P|KR889853	A
TTHYW168-08|Hylaeus annulatus|COI-5P|MF901686	A
SSEIB4374-13|Hylaeus annulatus|COI-5P|KR887579	A
CNWBX009-13|Hylaeus annulatus|COI-5P|KR789246	A
CNNHD2706-14|Hylaeus annulatus|COI-5P|KR803065	A
CNKLC2775-14|Hylaeus annulatus|COI-5P|KR801493	A
SSKUD125-15|Hylaeus annulatus|COI-5P|MF902928	A
SSKUD1685-15|Hylaeus annulatus|COI-5P|MF902836	A
SSKUB9239-15|Hylaeus annulatus|COI-5P|MF902570	A
SSPAC043-13|Hylaeus annulatus|COI-5P|KR891228	A
SSKUB7161-15|Hylaeus annulatus|COI-5P|MF906621	A
SSKUD1689-15|Hylaeus annulatus|COI-5P|MF908256	A
SSKUB9242-15|Hylaeus annulatus|COI-5P|MF906596	A
SSPAC048-13|Hylaeus annulatus|COI-5P|KR876590	A
SSKUB9241-15|Hylaeus annulatus|COI-5P|MF899462	A
SSPAB7467-13|Hylaeus annulatus|COI-5P|KR884723	A
SSWLE7694-13|Hylaeus annulatus|COI-5P|KR896874	A
SSKUD1671-15|Hylaeus annulatus|COI-5P|MF899003	A
SSGLA2997-15|Hylaeus annulatus|COI-5P|MF905413	A
CNKLB216-14|Hylaeus annulatus|COI-5P|KR809317	A
SSKUB9238-15|Hylaeus annulatus|COI-5P|MF899617	A
CNNHB120-14|Hylaeus annulatus|COI-5P|KR801138	A
SSKUB9240-15|Hylaeus annulatus|COI-5P|MF901364	A
SSKUD1704-15|Hylaeus annulatus|COI-5P|MF906051	A
SSKUB12061-15|Hylaeus annulatus|COI-5P|MF900902	A
SSKUB12063-15|Hylaeus annulatus|COI-5P|MF900516	A
CNPKF2624-14|Hylaeus annulatus|COI-5P|KR411948	A
TTHYW1036-09|Hylaeus annulatus|COI-5P|MF907747	A
BBHYJ656-10|Hylaeus annulatus|COI-5P|KR798181	A
HCBNS016-03|Hylaeus annulatus|COI-5P|FJ582253	A
HCBNS015-03|Hylaeus annulatus|COI-5P|FJ582252	A
HCBNS009-03|Hylaeus annulatus|COI-5P|FJ582249	A
AEDNA915-12|Hylaeus annulatus|COI-5P|KC502460	A
TTHYW334-08|Hylaeus annulatus|COI-5P|KR899658	A
HCBNS012-03|Hylaeus annulatus|COI-5P|FJ582251	A
HCBNS010-03|Hylaeus annulatus|COI-5P|FJ582250	A
MBIOI1088-13|Hylaeus annulatus|COI-5P|KR794437	A
JSYKA018-09|Hylaeus annulatus|COI-5P|HM395379	A
BEEMH236-06|Hylaeus annulatus|COI-5P|MG438870	A
CNWBG2041-13|Hylaeus annulatus|COI-5P|KR791297	A
SSKUB12064-15|Hylaeus annulatus|COI-5P|MF902192	A
FBAPB571-09|Hylaeus annulatus|COI-5P|HM401164	A
FBAPC505-11|Hylaeus annulatus|COI-5P|KJ837628	A
GBACU3589-13|Hylaeus annulatus|COI-5P|KJ837633	A
FBAPC506-11|Hylaeus annulatus|COI-5P|KJ838635	A
FBAPD764-11|Hylaeus annulatus|COI-5P|KJ837483	A
FBAPD763-11|Hylaeus annulatus|COI-5P|KJ839564	A
FBAPD761-11|Hylaeus annulatus|COI-5P|KJ839725	A
FBAPD762-11|Hylaeus annulatus|COI-5P|KJ839556	A
FBAPB570-09|Hylaeus annulatus|COI-5P|KJ839676	A
HYLNS005-13|Hylaeus anomalus|COI-5P|KF583516	A
HYLHI014-08|Hylaeus anthracinus|COI-5P|FJ411541	A
HYLHI016-08|Hylaeus anthracinus|COI-5P|FJ411539	A
HYLHI015-08|Hylaeus anthracinus|COI-5P|FJ411540	A
HYLHI017-08|Hylaeus anthracinus|COI-5P|FJ411538	A
HYLHI018-08|Hylaeus anthracinus|COI-5P|FJ411537	A
HYLHI020-08|Hylaeus anthracinus|COI-5P|FJ411535	A
HYLHI019-08|Hylaeus anthracinus|COI-5P|FJ411536	A
HYLHI026-08|Hylaeus anthracinus|COI-5P|FJ411529	A
HYLHI027-08|Hylaeus anthracinus|COI-5P|FJ411528	A
HYLHI028-08|Hylaeus anthracinus|COI-5P|FJ411527	A
HYLHI025-08|Hylaeus anthracinus|COI-5P|FJ411530	A
HYLHI024-08|Hylaeus anthracinus|COI-5P|FJ411531	A
HYLHI021-08|Hylaeus anthracinus|COI-5P|FJ411534	A
HYLHI023-08|Hylaeus anthracinus|COI-5P|FJ411532	A
HYLHI022-08|Hylaeus anthracinus|COI-5P|FJ411533	A
GBMIN29283-13|Callomelitta antipodes|COI-5P|JN603418	A
GBAH4169-09|Chilicola araucana|COI-5P|DQ872723	A
LASNA356-08|Caupolicana ARG01|COI-5P	A
LASNA450-08|Caupolicana ARG01|COI-5P	A
LASNA358-08|Nomiocolletes ARG01|COI-5P	A
LASNA452-08|Nomiocolletes ARG01|COI-5P	A
LASNA571-08|Ptiloglossa ARG01|COI-5P	A
LASNA476-08|Ptiloglossa ARG01|COI-5P	A
BOFTW154-08|Colletes argentinus|COI-5P	A
BOFTW155-08|Colletes argentinus|COI-5P	A
LASNA797-08|Scrapter arium|COI-5P	A
LASNA703-08|Scrapter arium|COI-5P	A
NZHYM447-10|Hylaeus asperithorax|COI-5P	A
NZHYM446-10|Hylaeus asperithorax|COI-5P	A
HYLHI032-08|Hylaeus assimulans|COI-5P|FJ411542	A
HYLHI031-08|Hylaeus assimulans|COI-5P|FJ411543	A
HYLHI030-08|Hylaeus assimulans|COI-5P|FJ411544	A
HYLHI029-08|Hylaeus assimulans|COI-5P|FJ411545	A
BEECA865-07|Colletes atacamensis|COI-5P	A
AUSBS138-12|Euhesma aurata|COI-5P	A
LASNA794-08|Scrapter aureiferus|COI-5P	A
LASNA700-08|Scrapter aureiferus|COI-5P	A
GBAH4181-09|Xeromelissa australis|COI-5P|DQ872711	A
GBAH4191-09|Xeromelissa australis|COI-5P|DQ872701	A
ABBOL182-15|Colletes babai|COI-5P	A
ABBOL183-15|Colletes babai|COI-5P	A
ABBOL181-15|Colletes babai|COI-5P	A
ABBOL184-15|Colletes babai|COI-5P	A
GBMIN74623-17|Colletes babai|COI-5P|LC102397	A
ABBOL185-15|Colletes babai|COI-5P	A
GBMIN74622-17|Colletes babai|COI-5P|LC102398	A
HDBNS002-03|Hylaeus basalis|COI-5P|FJ582254	A
HDBNS003-03|Hylaeus basalis|COI-5P|FJ582255	A
BEECB1027-07|Hylaeus basalis|COI-5P	A
BEECA967-07|Hylaeus basalis|COI-5P	A
HDBNS004-03|Hylaeus basalis|COI-5P|FJ582256	A
BBHYL392-10|Hylaeus basalis|COI-5P|JN293822	A
BEECA231-06|Hylaeus basalis|COI-5P	A
GBAH4204-09|Colletes bicolor|COI-5P|DQ872688	A
GBAH3269-08|Colletes bicolor|COI-5P|EF218720	A
GBAH4200-09|Colletes bicolor|COI-5P|DQ872692	A
GBAH7409-13|Scrapter bicolor|COI-5P|JN578888	A
BEECB131-07|Colletes birkmanni|COI-5P	A
AUSBS372-13|Xanthesma brachycera|COI-5P	A
FBACB720-11|Hylaeus brevicornis|COI-5P|KJ837875	A
FBACB723-11|Hylaeus brevicornis|COI-5P|KJ837275	A
FBACB719-11|Hylaeus brevicornis|COI-5P|KJ839616	A
FBHAP221-09|Hylaeus brevicornis|COI-5P|KJ836413	A
FBACB721-11|Hylaeus brevicornis|COI-5P|KJ838338	A
FBAPD554-11|Hylaeus brevicornis|COI-5P|KJ839717	A
FBACB722-11|Hylaeus brevicornis|COI-5P|KJ836602	A
FBAPD448-11|Hylaeus brevicornis|COI-5P|KJ839278	A
ABEE228-17|Hylaeus brevicornis|COI-5P	A
DLII1455-08|Hylaeus brevicornis|COI-5P	A
GBACU1222-12|Hylaeus brevicornis|COI-5P|KJ838855	A
FBAPD454-11|Hylaeus brevicornis|COI-5P|KJ838820	A
GBACU1406-12|Hylaeus brevicornis|COI-5P|KJ836703	A
BEEEE200-15|Hylaeus brevicornis|COI-5P	A
ABEE034-17|Hylaeus brevicornis|COI-5P	A
FBAPD452-11|Hylaeus brevicornis|COI-5P|KJ838862	A
FBHAP218-09|Hylaeus brevicornis|COI-5P|KJ837692	A
FBAPD555-11|Hylaeus brevicornis|COI-5P|KJ837546	A
FBACB724-11|Hylaeus brevicornis|COI-5P|KJ836511	A
DLII1461-08|Hylaeus brevicornis|COI-5P	A
DLII1486-08|Hylaeus brevicornis|COI-5P	A
ABEE092-17|Colletes brevigena|COI-5P	A
GBAH1839-06|Colletes brevigena|COI-5P|DQ085546	A
AUSBS297-13|Euhesma bronzus|COI-5P	A
AUSBS296-13|Euhesma bronzus|COI-5P	A
AUSBS293-13|Euhesma bronzus|COI-5P	A
AUSBS295-13|Euhesma bronzus|COI-5P	A
AUSBS294-13|Euhesma bronzus|COI-5P	A
GBAH4196-09|Callohesma calliopsella|COI-5P|DQ872696	A
BOWGF067-08|Scrapter calx|COI-5P	A
BOWGF065-08|Scrapter calx|COI-5P	A
BOWGF066-08|Scrapter calx|COI-5P	A
LASNA695-08|Scrapter calx|COI-5P	A
LASNA789-08|Scrapter calx|COI-5P	A
GBAH3266-08|Colletes capensis|COI-5P|EF218723	A
SCRAP001-14|Scrapter capensis|COI-5P	A
AUSBS111-12|Leioproctus capito|COI-5P	A
AUSBS110-12|Leioproctus capito|COI-5P	A
AUSBS112-12|Leioproctus capito|COI-5P	A
NZHYM448-10|Hylaeus capitosus|COI-5P	A
NZHYM449-10|Hylaeus capitosus|COI-5P	A
SCRAP014-14|Scrapter carysomus|COI-5P	A
SCRAP061-14|Scrapter carysomus|COI-5P	A
SCRAP002-14|Scrapter carysomus|COI-5P	A
BOWGF069-08|Scrapter catoxys|COI-5P	A
BOWGF064-08|Scrapter catoxys|COI-5P	A
BOWGF068-08|Scrapter catoxys|COI-5P	A
AUSBS114-12|Trichocolletes centralis|COI-5P	A
BEECB487-07|Colletes cf. phaceliae|COI-5P	A
BEECB488-07|Colletes cf. phaceliae|COI-5P	A
DLII1324-08|Chilicola chalcidiformis|COI-5P|KX820473	A
DLII1322-08|Chilicola chalcidiformis|COI-5P|KX820886	A
LASNA357-08|Willinkapis chalybaea|COI-5P	A
LASNA451-08|Willinkapis chalybaea|COI-5P	A
BOWGF3003-14|Chilicola charizard|COI-5P|KX051540	A
BOTWC053-10|Chilicola charizard|COI-5P|HQ937302	A
BOTWC048-10|Chilicola charizard|COI-5P|HQ937299	A
BOWGF3002-14|Chilicola charizard|COI-5P|KX051522	A
BOTWA1289-11|Chilicola charizard|COI-5P|KX051517	A
BOFTW241-09|Xenochilicola CHIL03northern|COI-5P|KX820664	A
SCRAP013-14|Scrapter chloris|COI-5P	A
GBMIN29311-13|Scrapter chloris|COI-5P|JN603435	A
GBAH7396-13|Hylaeus chlorosomus|COI-5P|JN578903	A
HYLHI034-08|Hylaeus chlorostictus|COI-5P|FJ411549	A
HYLHI036-08|Hylaeus chlorostictus|COI-5P|FJ411547	A
HYLHI033-08|Hylaeus chlorostictus|COI-5P|FJ411550	A
HYLHI035-08|Hylaeus chlorostictus|COI-5P|FJ411548	A
HYLHI037-08|Hylaeus chlorostictus|COI-5P|FJ411546	A
GBAH4183-09|Xeromelissa chusmiza|COI-5P|DQ872709	A
LASNA557-08|Xeromelissa chusmiza|COI-5P|KX820345	A
LASNA652-08|Xeromelissa chusmiza|COI-5P	A
GBMIN12185-13|Colletes clypearis group sp. ZQN-2013|COI-5P|KC469665	A
GBMIN12208-13|Colletes clypearis group sp. ZQN-2013|COI-5P|KC469666	A
GBMIN12184-13|Colletes clypearis group sp. ZQN-2013|COI-5P|KC469667	A
FBAPC499-11|Hylaeus clypearis|COI-5P|KJ837635	A
FBAPC500-11|Hylaeus clypearis|COI-5P|KJ837688	A
GBACU1111-12|Hylaeus clypearis|COI-5P|KJ836989	A
GBACU1112-12|Hylaeus clypearis|COI-5P|KJ837124	A
GBACU1215-12|Hylaeus clypearis|COI-5P|KJ837958	A
GBACU2111-13|Hylaeus clypearis|COI-5P|KJ839428	A
FBACB716-11|Hylaeus clypearis|COI-5P|KJ839068	A
GBACU1217-12|Hylaeus clypearis|COI-5P|KJ838341	A
FBACB715-11|Hylaeus clypearis|COI-5P|KJ837806	A
FBAPD823-11|Hylaeus clypearis|COI-5P|KJ837239	A
GBACU1214-12|Hylaeus clypearis|COI-5P|KJ836801	A
FBAPB575-09|Hylaeus clypearis|COI-5P|HM401165	A
GBACU1216-12|Hylaeus clypearis|COI-5P|KJ837690	A
FBAPC946-11|Hylaeus clypearis|COI-5P|KJ837848	A
FBAPC947-11|Hylaeus clypearis|COI-5P|KJ839422	A
GBACU2788-13|Hylaeus clypearis|COI-5P|KJ838174	A
GBACU2789-13|Hylaeus clypearis|COI-5P|KJ839009	A
GBACU2790-13|Hylaeus clypearis|COI-5P|KJ839096	A
FBAPC945-11|Hylaeus clypearis|COI-5P|KJ838711	A
FBAPD824-11|Hylaeus clypearis|COI-5P|KJ839270	A
FBAPB577-09|Hylaeus clypearis|COI-5P|KJ838304	A
BEECC676-09|Colletes clypeonitens|COI-5P	A
GBMIN12214-13|Colletes collaris|COI-5P|KC469654	A
GBMIN12191-13|Colletes collaris|COI-5P|KC469653	A
GBMIN12217-13|Colletes collaris|COI-5P|KC469648	A
GBMIN12215-13|Colletes collaris|COI-5P|KC469652	A
GBMIN12193-13|Colletes collaris|COI-5P|KC469649	A
GBMIN12216-13|Colletes collaris|COI-5P|KC469650	A
GBMIN12221-13|Colletes collaris|COI-5P|KC469640	A
GBMIN12196-13|Colletes collaris|COI-5P|KC469643	A
GBMIN12218-13|Colletes collaris|COI-5P|KC469646	A
GBMIN12194-13|Colletes collaris|COI-5P|KC469647	A
GBMIN12195-13|Colletes collaris|COI-5P|KC469645	A
GBMIN12219-13|Colletes collaris|COI-5P|KC469644	A
GBMIN12192-13|Colletes collaris|COI-5P|KC469651	A
GBMIN12197-13|Colletes collaris|COI-5P|KC469641	A
GBMIN12220-13|Colletes collaris|COI-5P|KC469642	A
GBAH1837-06|Colletes collaris|COI-5P|DQ085544	A
ABBOL001-15|Colletes collaris|COI-5P	A
ABBOL002-15|Colletes collaris|COI-5P	A
FBAPD464-11|Hylaeus communis|COI-5P|KJ837802	A
FBAPD849-11|Hylaeus communis|COI-5P|KJ836412	A
FBAPD465-11|Hylaeus communis|COI-5P|KJ838461	A
FBAPD850-11|Hylaeus communis|COI-5P|KJ837912	A
FBACB725-11|Hylaeus communis|COI-5P|KJ836850	A
FBAPD852-11|Hylaeus communis|COI-5P|KJ839018	A
GBACU2169-13|Hylaeus communis|COI-5P|KJ839696	A
FBAPD463-11|Hylaeus communis|COI-5P|KJ837530	A
FBHAP225-09|Hylaeus communis|COI-5P|KJ838665	A
FBHAP222-09|Hylaeus communis|COI-5P|KJ839161	A
FBHAP223-09|Hylaeus communis|COI-5P|KJ837529	A
FBHAP224-09|Hylaeus communis|COI-5P|KJ839502	A
FBHAP135-09|Hylaeus communis|COI-5P|KJ838185	A
FBAPB578-09|Hylaeus communis|COI-5P|KJ838031	A
IBBP093-10|Hylaeus communis|COI-5P|JQ909736	A
IBBP092-10|Hylaeus communis|COI-5P|JQ909738	A
IBBP094-10|Hylaeus communis|COI-5P|JQ909739	A
IBBP095-10|Hylaeus communis|COI-5P|JQ909737	A
RBINA5046-13|Colletes compactus|COI-5P|KR878058	A
RBINA4017-13|Colletes compactus|COI-5P|KR878941	A
RBINA929-13|Colletes compactus|COI-5P|KR902215	A
RBINA4022-13|Colletes compactus|COI-5P|KR887346	A
BEECB653-07|Colletes compactus|COI-5P	A
UPOLB454-09|Colletes compactus|COI-5P	A
UPOLB452-09|Colletes compactus|COI-5P	A
BEECB654-07|Colletes compactus|COI-5P	A
SMTPD5755-13|Colletes compactus|COI-5P|KR884035	A
RBINA4019-13|Colletes compactus|COI-5P|KR881928	A
RBINA931-13|Colletes compactus|COI-5P|KR875777	A
RBINA928-13|Colletes compactus|COI-5P|KR876717	A
GBAH4208-09|Colletes compactus|COI-5P|DQ872684	A
HCBNS004-03|Colletes compactus|COI-5P|FJ582200	A
HCBNS001-03|Colletes compactus|COI-5P|FJ582198	A
HCBNS002-03|Colletes compactus|COI-5P|FJ582199	A
BEECA446-06|Colletes compactus|COI-5P	A
BEECA445-06|Colletes compactus|COI-5P	A
NZHYM432-10|Hyleoides concinna|COI-5P|JN273626	A
NZHYM431-10|Hyleoides concinna|COI-5P|JN273625	A
GBAH4158-09|Hyleoides concinna|COI-5P|DQ872734	A
FBAPB180-09|Hylaeus confusus|COI-5P|HM401063	A
GBACU3562-13|Hylaeus confusus|COI-5P|KJ838219	A
FBHAP236-09|Hylaeus confusus|COI-5P|GU705975	A
GBACU2460-13|Hylaeus confusus|COI-5P|KJ837090	A
FBHAP237-09|Hylaeus confusus|COI-5P|GU705974	A
FBAPB178-09|Hylaeus confusus|COI-5P|HM401061	A
GBACU2457-13|Hylaeus confusus|COI-5P|KJ837323	A
FBAPB179-09|Hylaeus confusus|COI-5P|HM401062	A
FBHAP234-09|Hylaeus confusus|COI-5P|HM401444	A
FBAPB181-09|Hylaeus confusus|COI-5P|KJ836528	A
FBHAP226-09|Hylaeus confusus|COI-5P|KJ837199	A
FBHAP227-09|Hylaeus confusus|COI-5P|KJ836858	A
FBHAP228-09|Hylaeus confusus|COI-5P|KJ838286	A
GMGMK1488-14|Hylaeus confusus|COI-5P	A
IBBP096-10|Hylaeus confusus|COI-5P|JQ909741	A
IBBP097-10|Hylaeus confusus|COI-5P|JQ909740	A
BEEEE043-15|Hylaeus confusus|COI-5P|KT074046	A
NOBEE066-09|Hylaeus confusus|COI-5P	A
GMGMK445-14|Hylaeus confusus|COI-5P	A
FBHAP235-09|Hylaeus confusus|COI-5P|HM401445	A
GMGMK746-14|Hylaeus confusus|COI-5P	A
ABEE199-17|Hylaeus confusus|COI-5P	A
GMGMJ1499-14|Hylaeus confusus|COI-5P	A
GBACU2458-13|Hylaeus confusus|COI-5P|KJ839280	A
ABEE109-17|Hylaeus confusus|COI-5P	A
ABEE150-17|Hylaeus confusus|COI-5P	A
HYLHI038-08|Hylaeus coniceps|COI-5P|FJ411559	A
HYLHI039-08|Hylaeus coniceps|COI-5P|FJ411558	A
HYLHI042-08|Hylaeus coniceps|COI-5P|FJ411555	A
HYLHI040-08|Hylaeus coniceps|COI-5P|FJ411557	A
HYLHI046-08|Hylaeus coniceps|COI-5P|FJ411551	A
HYLHI041-08|Hylaeus coniceps|COI-5P|FJ411556	A
HYLHI043-08|Hylaeus coniceps|COI-5P|FJ411554	A
HYLHI045-08|Hylaeus coniceps|COI-5P|FJ411552	A
HYLHI044-08|Hylaeus coniceps|COI-5P|FJ411553	A
HYLHI058-08|Hylaeus connectens|COI-5P|FJ411560	A
HYLHI057-08|Hylaeus connectens|COI-5P|FJ411561	A
HYLHI056-08|Hylaeus connectens|COI-5P|FJ411562	A
HYLHI055-08|Hylaeus connectens|COI-5P|FJ411563	A
HYLHI049-08|Hylaeus connectens|COI-5P|FJ411569	A
HYLHI051-08|Hylaeus connectens|COI-5P|FJ411567	A
HYLHI052-08|Hylaeus connectens|COI-5P|FJ411566	A
HYLHI053-08|Hylaeus connectens|COI-5P|FJ411565	A
HYLHI050-08|Hylaeus connectens|COI-5P|FJ411568	A
HYLHI054-08|Hylaeus connectens|COI-5P|FJ411564	A
HYLHI047-08|Hylaeus connectens|COI-5P|FJ411571	A
HYLHI048-08|Hylaeus connectens|COI-5P|FJ411570	A
BEECC670-09|Colletes consors|COI-5P	A
BEECB725-07|Colletes consors|COI-5P	A
BEECC199-08|Colletes consors|COI-5P	A
GBAH4159-09|Hylaeus constrictiformis|COI-5P|DQ872733	A
FBHAP230-09|Hylaeus cornutus|COI-5P|HM401442	A
FBHAP233-09|Hylaeus cornutus|COI-5P|HM401443	A
ABEE035-17|Hylaeus cornutus|COI-5P	A
FBAPC503-11|Hylaeus cornutus|COI-5P|KJ838337	A
GBACU2818-13|Hylaeus cornutus|COI-5P|KJ839307	A
GBCHA618-13|Hylaeus cornutus|COI-5P|KJ839471	A
GBACU2316-13|Hylaeus cornutus|COI-5P|KJ838512	A
FBHAP231-09|Hylaeus cornutus|COI-5P|KJ836699	A
FBHAP232-09|Hylaeus cornutus|COI-5P|KJ837058	A
BEEEE195-15|Hylaeus cornutus|COI-5P	A
BEEEE044-15|Hylaeus cornutus|COI-5P|KT074047	A
GBACU2819-13|Hylaeus cornutus|COI-5P|KJ837566	A
ABEE126-17|Hylaeus cornutus|COI-5P	A
ABEE114-17|Hylaeus cornutus|COI-5P	A
GBACU2817-13|Hylaeus cornutus|COI-5P|KJ836764	A
ASINH1290-12|Ptiloglossa costaricana|COI-5P	A
ASINH1288-12|Ptiloglossa costaricana|COI-5P	A
ASINH1289-12|Ptiloglossa costaricana|COI-5P	A
BEECB854-07|Ptiloglossa CR01|COI-5P	A
HYLHI059-08|Hylaeus crabronoides|COI-5P|FJ411575	A
HYLHI062-08|Hylaeus crabronoides|COI-5P|FJ411572	A
HYLHI061-08|Hylaeus crabronoides|COI-5P|FJ411573	A
HYLHI060-08|Hylaeus crabronoides|COI-5P|FJ411574	A
ABEE091-17|Colletes cunicularius|COI-5P	A
GMGMH1480-14|Colletes cunicularius|COI-5P	A
GMGMG283-14|Colletes cunicularius|COI-5P	A
GMGMH1492-14|Colletes cunicularius|COI-5P	A
GMGMH1511-14|Colletes cunicularius|COI-5P	A
GMGMH1499-14|Colletes cunicularius|COI-5P	A
GMGMH1476-14|Colletes cunicularius|COI-5P	A
GBACU1603-12|Colletes cunicularius|COI-5P|KJ838085	A
FBAPD105-11|Colletes cunicularius|COI-5P|KJ838323	A
GBACU1606-12|Colletes cunicularius|COI-5P|KJ838571	A
GBACU1604-12|Colletes cunicularius|COI-5P|KJ837801	A
GBACU1605-12|Colletes cunicularius|COI-5P|KJ838520	A
GBACU1609-12|Colletes cunicularius|COI-5P|KJ838280	A
GBACU1607-12|Colletes cunicularius|COI-5P|KJ837931	A
FBAPC477-11|Colletes cunicularius|COI-5P|KJ837197	A
FBHAP200-09|Colletes cunicularius|COI-5P|GU705968	A
NOBEE040-09|Colletes cunicularius|COI-5P	A
FBAPC636-11|Colletes cunicularius|COI-5P|KJ837588	A
FBHAP137-09|Colletes cunicularius|COI-5P|KJ837709	A
BOWGF167-08|Colletes cunicularius|COI-5P	A
GBACU1608-12|Colletes cunicularius|COI-5P|KJ839660	A
ABEE090-17|Colletes cunicularius|COI-5P	A
FBHAP202-09|Colletes cunicularius|COI-5P|HM401437	A
FBHAP201-09|Colletes cunicularius|COI-5P|HM401436	A
NOBEE041-09|Colletes cunicularius|COI-5P	A
GMGMH1483-14|Colletes cunicularius|COI-5P	A
BEEEE258-15|Colletes cunicularius|COI-5P	A
FBAPD106-11|Colletes cunicularius|COI-5P|KJ837079	A
GMGMH1589-14|Colletes cunicularius|COI-5P	A
GMGMI074-14|Colletes cunicularius|COI-5P	A
GBMIN74624-17|Colletes cunicularius|COI-5P|KX374762	A
HYAS1210-12|Leioproctus cupreus|COI-5P	A
AUSBS316-13|Leioproctus cupreus|COI-5P	A
AUSBS314-13|Leioproctus cupreus|COI-5P	A
BOFTW283-09|Chilicola curvapeligrosa|COI-5P	A
BOWGF2878-13|Chilicola curvapeligrosa|COI-5P|KX051504	A
BOTWC687-10|Chilicola curvapeligrosa|COI-5P|KX051500	A
BWTWO086-09|Chilicola curvapeligrosa|COI-5P|HQ937901	A
BWTWO069-09|Chilicola curvapeligrosa|COI-5P|HQ937895	A
GBMIN74625-17|Colletes daviesanus|COI-5P|MF416102	A
GBACU1173-12|Colletes daviesanus|COI-5P|KJ836475	A
BCHYM1520-13|Colletes daviesanus|COI-5P|KJ837865	A
NOBEE043-09|Colletes daviesanus|COI-5P	A
GBACU1172-12|Colletes daviesanus|COI-5P|KJ838737	A
GBACU1174-12|Colletes daviesanus|COI-5P|KJ839724	A
GBACU1175-12|Colletes daviesanus|COI-5P|KJ838120	A
GBACU3680-13|Colletes daviesanus|COI-5P|KJ837050	A
FBHAP203-09|Colletes daviesanus|COI-5P|HM376211	A
FBAPD931-11|Colletes daviesanus|COI-5P|KJ839317	A
ABEE015-17|Colletes daviesanus|COI-5P	A
FBAPC644-11|Colletes daviesanus|COI-5P|KJ838217	A
GBACU2293-13|Colletes daviesanus|COI-5P|KJ837191	A
GBACU3678-13|Colletes daviesanus|COI-5P|KJ837785	A
GBACU3681-13|Colletes daviesanus|COI-5P|KJ837423	A
FBAPD863-11|Colletes daviesanus|COI-5P|KJ836802	A
FBHAP205-09|Colletes daviesanus|COI-5P|HM401438	A
NOBEE042-09|Colletes daviesanus|COI-5P	A
BEEEE094-15|Colletes daviesanus|COI-5P	A
BEEEE198-15|Colletes daviesanus|COI-5P	A
ABEE016-17|Colletes daviesanus|COI-5P	A
GBACU3679-13|Colletes daviesanus|COI-5P|KJ838605	A
GMGMA585-14|Colletes daviesanus|COI-5P	A
GMGMA1011-14|Colletes daviesanus|COI-5P	A
GMGMN1327-14|Colletes daviesanus|COI-5P	A
ABEE152-17|Colletes daviesanus|COI-5P	A
FBHAP204-09|Colletes daviesanus|COI-5P|KJ839634	A
GBAH4214-09|Chilicolletes delahozii|COI-5P|DQ872678	A
BOTWC947-10|Chilicola deserticola|COI-5P|KX051533	A
BOTWC950-10|Chilicola deserticola|COI-5P|KX051515	A
BOWGF3021-14|Chilicola deserticola|COI-5P|KX051528	A
BOTWC009-10|Chilicola deserticola|COI-5P|HQ937273	A
BOTWC013-10|Chilicola deserticola|COI-5P|HQ937276	A
AUSBS217-13|Hylaeus desertoris|COI-5P	A
AUSBS154-12|Hylaeus desertoris|COI-5P	A
BOWGF3013-14|Chilicola diaguita|COI-5P|KX051518	A
BOWGF3320-14|Chilicola diaguita|COI-5P|KX051537	A
BOWGF3323-14|Chilicola diaguita|COI-5P|KX051539	A
HYLHI078-08|Hylaeus difficilis|COI-5P|FJ411576	A
HYLHI077-08|Hylaeus difficilis|COI-5P|FJ411577	A
HYLHI075-08|Hylaeus difficilis|COI-5P|FJ411579	A
HYLHI076-08|Hylaeus difficilis|COI-5P|FJ411578	A
HYLHI064-08|Hylaeus difficilis|COI-5P|FJ411590	A
HYLHI066-08|Hylaeus difficilis|COI-5P|FJ411588	A
HYLHI063-08|Hylaeus difficilis|COI-5P|FJ411591	A
HYLHI065-08|Hylaeus difficilis|COI-5P|FJ411589	A
HYLHI067-08|Hylaeus difficilis|COI-5P|FJ411587	A
HYLHI070-08|Hylaeus difficilis|COI-5P|FJ411584	A
HYLHI069-08|Hylaeus difficilis|COI-5P|FJ411585	A
HYLHI068-08|Hylaeus difficilis|COI-5P|FJ411586	A
HYLHI071-08|Hylaeus difficilis|COI-5P|FJ411583	A
HYLHI072-08|Hylaeus difficilis|COI-5P|FJ411582	A
HYLHI074-08|Hylaeus difficilis|COI-5P|FJ411580	A
HYLHI073-08|Hylaeus difficilis|COI-5P|FJ411581	A
FBAPC949-11|Hylaeus difformis|COI-5P|KJ839041	A
GBACU322-12|Hylaeus difformis|COI-5P|KJ837121	A
FBAPB579-09|Hylaeus difformis|COI-5P|HM401166	A
GMGMA715-14|Hylaeus difformis|COI-5P	A
GMGMA741-14|Hylaeus difformis|COI-5P	A
GMGMA754-14|Hylaeus difformis|COI-5P	A
GMGMC1047-14|Hylaeus difformis|COI-5P	A
GMGMC681-14|Hylaeus difformis|COI-5P	A
GBACU321-12|Hylaeus difformis|COI-5P|KJ837503	A
FBAPB580-09|Hylaeus difformis|COI-5P|KJ838216	A
GBACU2032-12|Hylaeus dilatatus|COI-5P|KJ839080	A
GBACU2030-12|Hylaeus dilatatus|COI-5P|KJ839648	A
GBACU2031-12|Hylaeus dilatatus|COI-5P|KJ839090	A
GBACU2029-12|Hylaeus dilatatus|COI-5P|KJ838053	A
FBHAP215-09|Hylaeus dilatatus|COI-5P|HM376212	A
FBAPC760-11|Hylaeus dilatatus|COI-5P|KJ837970	A
FBAPC498-11|Hylaeus dilatatus|COI-5P|KJ838490	A
GBACU035-12|Hylaeus dilatatus|COI-5P|KJ839055	A
GBCHA610-13|Hylaeus dilatatus|COI-5P|KJ839793	A
ABEE226-17|Hylaeus dilatatus|COI-5P	A
GBACU2326-13|Hylaeus dilatatus|COI-5P|KJ839210	A
GBACU1115-12|Hylaeus dilatatus|COI-5P|KJ837281	A
GBACU036-12|Hylaeus dilatatus|COI-5P|KJ838171	A
GBCHA608-13|Hylaeus dilatatus|COI-5P|KJ839778	A
FBHAP214-09|Hylaeus dilatatus|COI-5P|HM401441	A
ABEE036-17|Hylaeus dilatatus|COI-5P	A
GBCHA609-13|Hylaeus dilatatus|COI-5P|KJ837720	A
GBACU2813-13|Hylaeus dilatatus|COI-5P|KJ837374	A
ABEE037-17|Hylaeus dilatatus|COI-5P	A
ABEE038-17|Hylaeus dilatatus|COI-5P	A
GBACU2809-13|Hylaeus dilatatus|COI-5P|KJ839192	A
GBACU2808-13|Hylaeus dilatatus|COI-5P|KJ838309	A
GBACU2810-13|Hylaeus dilatatus|COI-5P|KJ838140	A
GBACU2811-13|Hylaeus dilatatus|COI-5P|KJ836721	A
FBAPC497-11|Hylaeus dilatatus|COI-5P|KJ838534	A
BEEEE045-15|Hylaeus dilatatus|COI-5P|KT074048	A
BEEEE188-15|Hylaeus dilatatus|COI-5P	A
GBMTG3754-16|Hylaeus dilatatus|COI-5P|NC_026468	A
GBMNA9974-19|Hylaeus dilatatus|COI-5P|KP126800	A
BOFTW282-09|Caupolicana dimidiata|COI-5P|KX820481	A
HYLHI079-08|Hylaeus dimidiatus|COI-5P|FJ411594	A
HYLHI080-08|Hylaeus dimidiatus|COI-5P|FJ411593	A
HYLHI081-08|Hylaeus dimidiatus|COI-5P|FJ411592	A
GBAH3259-08|Colletes distinctus|COI-5P|EF363693	A
GBAH4209-09|Colletes distinctus|COI-5P|DQ872683	A
FBAPB583-09|Hylaeus duckei|COI-5P|KJ836842	A
FBAPB581-09|Hylaeus duckei|COI-5P|HM401167	A
FBAPB584-09|Hylaeus duckei|COI-5P|HM401169	A
FBAPB582-09|Hylaeus duckei|COI-5P|HM401168	A
HYLHI085-08|Hylaeus dumetorum|COI-5P|FJ411597	A
HYLHI087-08|Hylaeus dumetorum|COI-5P|FJ411595	A
HYLHI086-08|Hylaeus dumetorum|COI-5P|FJ411596	A
HYLHI084-08|Hylaeus dumetorum|COI-5P|FJ411598	A
HYLHI082-08|Hylaeus dumetorum|COI-5P|FJ411600	A
HYLHI083-08|Hylaeus dumetorum|COI-5P|FJ411599	A
FBAPC637-11|Colletes dusmeti|COI-5P|KJ839788	A
AUSBS380-13|Hylaeus elegans|COI-5P	A
AUSBS379-13|Hylaeus elegans|COI-5P	A
AUSBS378-13|Hylaeus elegans|COI-5P	A
BWTWO038-09|Chilicola erithropoda|COI-5P|HQ937890	A
BOTWC949-10|Chilicola erithropoda|COI-5P|KX051542	A
BOTWC006-10|Chilicola erithropoda|COI-5P|HQ937271	A
BOTWC948-10|Chilicola erithropoda|COI-5P|KX051550	A
BOTWC946-10|Chilicola erithropoda|COI-5P|KX051555	A
BOWGF3022-14|Chilicola erithropoda|COI-5P|KX051556	A
GBAH4193-09|Scrapter erubescens|COI-5P|DQ872699	A
GBAH7385-13|Meroglossa eucalypti|COI-5P|JN578914	A
BEECC694-09|Colletes eulophi|COI-5P	A
BEECC696-09|Colletes eulophi|COI-5P	A
AUSBS327-13|Callohesma euxantha|COI-5P	A
AUSBS324-13|Callohesma euxantha|COI-5P	A
AUSBS325-13|Callohesma euxantha|COI-5P	A
AUSBS326-13|Callohesma euxantha|COI-5P	A
HYQTB237-12|Hylaeus euxanthus|COI-5P	A
GBAH7401-13|Hylaeus euxanthus|COI-5P|JN578898	A
BOFWM008-08|Caupolicana evansi|COI-5P	A
BOWGF074-08|Scrapter exiguus|COI-5P	A
BOWGF075-08|Scrapter exiguus|COI-5P	A
ASINH1295-12|Ptiloglossa eximia|COI-5P	A
ASINH1296-12|Ptiloglossa eximia|COI-5P	A
BOFTW224-09|Xeromelissa farellones|COI-5P|KX820987	A
HYLHI089-08|Hylaeus filicum|COI-5P|FJ411603	A
HYLHI090-08|Hylaeus filicum|COI-5P|FJ411602	A
HYLHI093-08|Hylaeus flavifrons|COI-5P|FJ411605	A
HYLHI091-08|Hylaeus flavifrons|COI-5P|FJ411607	A
HYLHI092-08|Hylaeus flavifrons|COI-5P|FJ411606	A
HYLHI094-08|Hylaeus flavifrons|COI-5P|FJ411604	A
HYLHI098-08|Hylaeus flavipes|COI-5P|FJ411613	A
HYLHI097-08|Hylaeus flavipes|COI-5P|FJ411614	A
HYLHI101-08|Hylaeus flavipes|COI-5P|FJ411610	A
HYLHI100-08|Hylaeus flavipes|COI-5P|FJ411611	A
HYLHI103-08|Hylaeus flavipes|COI-5P|FJ411608	A
HYLHI102-08|Hylaeus flavipes|COI-5P|FJ411609	A
HYLHI096-08|Hylaeus flavipes|COI-5P|FJ411615	A
HYLHI099-08|Hylaeus flavipes|COI-5P|FJ411612	A
HYLHI095-08|Hylaeus flavipes|COI-5P|FJ411616	A
AUSBS332-13|Callohesma flavopicta|COI-5P	A
AUSBS357-13|Callohesma flavopicta|COI-5P	A
AUSBS370-13|Callohesma flavopicta|COI-5P	A
GBMIN29319-13|Callohesma flavopicta|COI-5P|JN603419	A
FBAPB978-09|Colletes floralis|COI-5P|HQ948115	A
GBACU3690-13|Colletes floralis|COI-5P|KJ838401	A
FBAPC479-11|Colletes floralis|COI-5P|KJ838315	A
FBAPB979-09|Colletes floralis|COI-5P|HQ948116	A
FBAPB980-09|Colletes floralis|COI-5P|HQ948117	A
NOBEE044-09|Colletes floralis|COI-5P	A
IBBP069-10|Colletes floralis|COI-5P|JQ909715	A
IBBP071-10|Colletes floralis|COI-5P|JQ909712	A
IBBP070-10|Colletes floralis|COI-5P|JQ909713	A
IBBP068-10|Colletes floralis|COI-5P|JQ909714	A
GBAH4201-09|Colletes floralis|COI-5P|DQ872691	A
ABBOL010-15|Hylaeus floralis|COI-5P	A
BEECC002-08|Hylaeus floridanus|COI-5P	A
FBAPD862-11|Colletes fodiens|COI-5P|KJ837664	A
GBACU2371-13|Colletes fodiens|COI-5P|KJ838094	A
FBAPB529-09|Colletes fodiens|COI-5P|HM401156	A
GBACU961-12|Colletes fodiens|COI-5P|KJ836601	A
FBHAP136-09|Colletes fodiens|COI-5P|KJ839748	A
GBACU1256-12|Colletes fodiens|COI-5P|KJ838435	A
GBACU1257-12|Colletes fodiens|COI-5P|KJ838551	A
FBAPD860-11|Colletes fodiens|COI-5P|KJ839765	A
GBACU1258-12|Colletes fodiens|COI-5P|KJ838918	A
GBACU960-12|Colletes fodiens|COI-5P|KJ838013	A
GBACU1255-12|Colletes fodiens|COI-5P|KJ836805	A
FBAPC476-11|Colletes fodiens|COI-5P|KJ838844	A
FBAPD861-11|Colletes fodiens|COI-5P|KJ839367	A
BEEEE038-15|Colletes fodiens|COI-5P|KT074041	A
BEEEE216-15|Colletes fodiens|COI-5P	A
FBHAP207-09|Colletes fodiens|COI-5P|KJ836830	A
FBHAP208-09|Colletes fodiens|COI-5P|KJ839620	A
BEECB403-07|Colletes fulgidus|COI-5P	A
BEECB753-07|Colletes fulgidus|COI-5P	A
BEECC699-09|Colletes fulgidus|COI-5P	A
BBHYA2767-12|Colletes fulgidus|COI-5P	A
BEECB569-07|Colletes fulgidus|COI-5P	A
BEECB503-07|Colletes fulgidus|COI-5P	A
BEECB486-07|Colletes fulgidus|COI-5P	A
BEECB404-07|Colletes fulgidus|COI-5P	A
BEECB1029-07|Colletes fulgidus|COI-5P	A
BEECB727-07|Colletes fulgidus|COI-5P	A
BEECB726-07|Colletes fulgidus|COI-5P	A
BEECB752-07|Colletes fulgidus|COI-5P	A
BEECB560-07|Colletes fulgidus|COI-5P	A
NGNAH1323-13|Colletes fulgidus|COI-5P|KR934891	A
NGNAI479-13|Colletes fulgidus|COI-5P|KR886795	A
NGNAC3071-13|Colletes fulgidus|COI-5P|KR886056	A
NGNAC3073-13|Colletes fulgidus|COI-5P|KR880144	A
NGNAN3999-14|Colletes fulgidus|COI-5P|KR888061	A
NGNAI473-13|Colletes fulgidus|COI-5P|KR881097	A
NGNAC3068-13|Colletes fulgidus|COI-5P|KR897793	A
NGNAC3069-13|Colletes fulgidus|COI-5P|KR901625	A
NGNAC3072-13|Colletes fulgidus|COI-5P|KR894760	A
NGNAX2026-14|Colletes fulgidus|COI-5P|KR887152	A
NGNAY2838-14|Colletes fulgidus|COI-5P|KR886570	A
NGAAC2086-14|Colletes fulgidus|COI-5P|KR879566	A
NGNAN4000-14|Colletes fulgidus|COI-5P|KR882777	A
BEECA428-06|Colletes fulgidus|COI-5P	A
AUSBS364-13|Euryglossula fultoni|COI-5P	A
AUSBS365-13|Euryglossula fultoni|COI-5P	A
AUSBS362-13|Euryglossula fultoni|COI-5P	A
AUSBS363-13|Euryglossula fultoni|COI-5P	A
AUSBS360-13|Xanthesma furcifera|COI-5P	A
AUSBS359-13|Xanthesma furcifera|COI-5P	A
GBAH4199-09|Colletes furfuraceus|COI-5P|DQ872693	A
HYLHI109-08|Hylaeus fuscipennis|COI-5P|FJ411620	A
HYLHI112-08|Hylaeus fuscipennis|COI-5P|FJ411617	A
HYLHI105-08|Hylaeus fuscipennis|COI-5P|FJ411624	A
HYLHI111-08|Hylaeus fuscipennis|COI-5P|FJ411618	A
HYLHI110-08|Hylaeus fuscipennis|COI-5P|FJ411619	A
HYLHI107-08|Hylaeus fuscipennis|COI-5P|FJ411622	A
HYLHI104-08|Hylaeus fuscipennis|COI-5P|FJ411625	A
HYLHI106-08|Hylaeus fuscipennis|COI-5P|FJ411623	A
HYLHI108-08|Hylaeus fuscipennis|COI-5P|FJ411621	A
LASNA651-08|Xeromelissa gailfraserae|COI-5P	A
BEECA852-07|Diphaglossa gayi|COI-5P|KX820649	A
GBACU040-12|Hylaeus gibbus|COI-5P|KJ838734	A
GBACU3565-13|Hylaeus gibbus|COI-5P|KJ837428	A
GBACU3559-13|Hylaeus gibbus|COI-5P|KJ837888	A
GBACU2431-13|Hylaeus gibbus|COI-5P|KJ837882	A
GBACU038-12|Hylaeus gibbus|COI-5P|KJ838098	A
GBACU039-12|Hylaeus gibbus|COI-5P|KJ837435	A
GBACU1460-12|Hylaeus gibbus|COI-5P|KJ837673	A
GBACU3569-13|Hylaeus gibbus|COI-5P|KJ836771	A
FBAPB175-09|Hylaeus gibbus|COI-5P|HQ948020	A
FBAPB177-09|Hylaeus gibbus|COI-5P|KJ838524	A
FBAPB176-09|Hylaeus gibbus|COI-5P|KJ839218	A
FBAPB174-09|Hylaeus gibbus|COI-5P|HM401060	A
ABEE227-17|Hylaeus gibbus|COI-5P	A
GBMIN31575-13|Colletes gigas|COI-5P|HQ258921	A
GBMTG3871-16|Colletes gigas|COI-5P|NC_026218	A
GBMNA9973-19|Colletes gigas|COI-5P|KM978210	A
BEECB623-07|Colletes gilensis|COI-5P	A
BEECC419-08|Colletes gilensis|COI-5P	A
GBAH4202-09|Colletes gilvus|COI-5P|DQ872690	A
GBGST081-13|Hylaeus glacialis|COI-5P|KJ838093	A
HYLHI002-08|Hylaeus globula|COI-5P|FJ411626	A
GBAH4195-09|Euryglossina globuliceps|COI-5P|DQ872697	A
FBAPB586-09|Hylaeus gracilicornis|COI-5P|HM401171	A
FBAPB585-09|Hylaeus gracilicornis|COI-5P|HM401170	A
FBAPD890-11|Colletes graeffei|COI-5P|KJ838657	A
FBAPD891-11|Colletes graeffei|COI-5P|KJ839614	A
GBAH3267-08|Colletes graeffei|COI-5P|EF218722	A
DLII1476-08|Hylaeus gredleri|COI-5P	A
GBACU1218-12|Hylaeus gredleri|COI-5P|KJ837951	A
GBACU1219-12|Hylaeus gredleri|COI-5P|KJ836458	A
GBACU1220-12|Hylaeus gredleri|COI-5P|KJ838022	A
GBACU2109-13|Hylaeus gredleri|COI-5P|KJ837430	A
GBACU1221-12|Hylaeus gredleri|COI-5P|KJ839686	A
FBAPD571-11|Hylaeus gredleri|COI-5P|KJ837308	A
GBACU032-12|Hylaeus gredleri|COI-5P|KJ836824	A
GBACU1223-12|Hylaeus gredleri|COI-5P|KJ838434	A
GBACU031-12|Hylaeus gredleri|COI-5P|KJ838561	A
FBAPC939-11|Hylaeus gredleri|COI-5P|KJ837158	A
GBACU2110-13|Hylaeus gredleri|COI-5P|KJ836580	A
GBCHA622-13|Hylaeus gredleri|COI-5P|KJ837144	A
FBACB718-11|Hylaeus gredleri|COI-5P|KJ836838	A
FBAPD557-11|Hylaeus gredleri|COI-5P|KJ838655	A
FBACB717-11|Hylaeus gredleri|COI-5P|KJ838650	A
GBACU2814-13|Hylaeus gredleri|COI-5P|KJ838172	A
FBAPD558-11|Hylaeus gredleri|COI-5P|KJ838108	A
FBAPD552-11|Hylaeus gredleri|COI-5P|KJ838794	A
DLII1479-08|Hylaeus gredleri|COI-5P	A
FBAPD556-11|Hylaeus gredleri|COI-5P|KJ838177	A
FBAPD559-11|Hylaeus gredleri|COI-5P|KJ837388	A
BOTWA1286-11|Chilicola guanicoe|COI-5P|KX051516	A
BOTWA1288-11|Chilicola guanicoe|COI-5P|KX051525	A
BOWGF3004-14|Chilicola guanicoe|COI-5P|KX051514	A
BOWGF3012-14|Chilicola guanicoe|COI-5P|KX051544	A
BOTWA1287-11|Chilicola guanicoe|COI-5P|KX051536	A
BOWGF3339-14|Chilicola guanicoe|COI-5P|KX051547	A
BOTWA1235-11|Chilicola guanicoe|COI-5P|KX051503	A
HYLHI119-08|Hylaeus haleakalae|COI-5P|FJ411629	A
HYLHI121-08|Hylaeus haleakalae|COI-5P|FJ411627	A
HYLHI118-08|Hylaeus haleakalae|COI-5P|FJ411630	A
HYLHI117-08|Hylaeus haleakalae|COI-5P|FJ411631	A
HYLHI120-08|Hylaeus haleakalae|COI-5P|FJ411628	A
HYLHI114-08|Hylaeus haleakalae|COI-5P|FJ411634	A
HYLHI113-08|Hylaeus haleakalae|COI-5P|FJ411635	A
HYLHI116-08|Hylaeus haleakalae|COI-5P|FJ411632	A
HYLHI115-08|Hylaeus haleakalae|COI-5P|FJ411633	A
GBAH1835-06|Colletes halophilus|COI-5P|DQ085542	A
GBAH1827-06|Colletes halophilus|COI-5P|DQ085534	A
GBAH1824-06|Colletes halophilus|COI-5P|DQ085531	A
GBAH1831-06|Colletes halophilus|COI-5P|DQ085538	A
GBAH1829-06|Colletes halophilus|COI-5P|DQ085536	A
GBAH1825-06|Colletes halophilus|COI-5P|DQ085532	A
GBAH1833-06|Colletes halophilus|COI-5P|DQ085540	A
GBAH1830-06|Colletes halophilus|COI-5P|DQ085537	A
GBAH1834-06|Colletes halophilus|COI-5P|DQ085541	A
GBAH1832-06|Colletes halophilus|COI-5P|DQ085539	A
GBAH1823-06|Colletes halophilus|COI-5P|DQ085530	A
GBAH1828-06|Colletes halophilus|COI-5P|DQ085535	A
GBAH1836-06|Colletes halophilus|COI-5P|DQ085543	A
GBAH1821-06|Colletes halophilus|COI-5P|DQ085528	A
GBAH1822-06|Colletes halophilus|COI-5P|DQ085529	A
GBAH1819-06|Colletes halophilus|COI-5P|DQ085526	A
BEEEE254-15|Colletes halophilus|COI-5P	A
BEEEE253-15|Colletes halophilus|COI-5P	A
GBAH1820-06|Colletes halophilus|COI-5P|DQ085527	A
GBAH1826-06|Colletes halophilus|COI-5P|DQ085533	A
GBAH1810-06|Colletes hederae|COI-5P|DQ085517	A
GBAH1811-06|Colletes hederae|COI-5P|DQ085518	A
GBAH1809-06|Colletes hederae|COI-5P|DQ085516	A
GBAH1806-06|Colletes hederae|COI-5P|DQ085513	A
GBAH1807-06|Colletes hederae|COI-5P|DQ085514	A
GBAH1808-06|Colletes hederae|COI-5P|DQ085515	A
BEEEE259-15|Colletes hederae|COI-5P	A
FBAPD432-11|Colletes hederae|COI-5P|KJ839205	A
FBAPB532-09|Colletes hederae|COI-5P|KJ838129	A
BEEEE260-15|Colletes hederae|COI-5P	A
BEEEE138-15|Colletes hederae|COI-5P	A
ABEE093-17|Colletes hederae|COI-5P	A
FBAPB530-09|Colletes hederae|COI-5P|KJ836768	A
GBAH4163-09|Chilicola herbsti|COI-5P|DQ872729	A
LASNA792-08|Scrapter heterodoxus|COI-5P	A
LASNA698-08|Scrapter heterodoxus|COI-5P	A
HYLHI122-08|Hylaeus hilaris|COI-5P|FJ411636	A
HYLHI125-08|Hylaeus hirsutulus|COI-5P|FJ411638	A
HYLHI124-08|Hylaeus hirsutulus|COI-5P|FJ411639	A
HYLHI126-08|Hylaeus hirsutulus|COI-5P|FJ411637	A
HYLHI123-08|Hylaeus hirsutulus|COI-5P|FJ411640	A
ASINH1301-12|Ptiloglossa hoplopoda|COI-5P	A
HYLHI129-08|Hylaeus hostilis|COI-5P|FJ411641	A
HYLHI128-08|Hylaeus hostilis|COI-5P|FJ411642	A
HYLHI127-08|Hylaeus hostilis|COI-5P|FJ411643	A
AUSBS303-13|Chrysocolletes houstoni|COI-5P	A
NZHYM436-10|Leioproctus huakiwi|COI-5P	A
HYLHI131-08|Hylaeus hula|COI-5P|FJ411646	A
HYLHI133-08|Hylaeus hula|COI-5P|FJ411644	A
HYLHI130-08|Hylaeus hula|COI-5P|FJ411647	A
HYLHI132-08|Hylaeus hula|COI-5P|FJ411645	A
BEEEE088-15|Hylaeus hyalinatus|COI-5P	A
GBACU037-12|Hylaeus hyalinatus|COI-5P|KJ839446	A
GBACU021-12|Hylaeus hyalinatus|COI-5P|KJ838508	A
GBACU020-12|Hylaeus hyalinatus|COI-5P|KJ837179	A
GBACU2802-13|Hylaeus hyalinatus|COI-5P|KJ837576	A
GBACU2837-13|Hylaeus hyalinatus|COI-5P|KJ837734	A
GBACU2841-13|Hylaeus hyalinatus|COI-5P|KJ837820	A
ABEE229-17|Hylaeus hyalinatus|COI-5P	A
FBHAP138-09|Hylaeus hyalinatus|COI-5P|KJ837456	A
GBACU2114-13|Hylaeus hyalinatus|COI-5P|KJ838662	A
GBACU1113-12|Hylaeus hyalinatus|COI-5P|KJ838018	A
GBACU2838-13|Hylaeus hyalinatus|COI-5P|KJ839386	A
FBHAP180-09|Hylaeus hyalinatus|COI-5P|KJ836922	A
NOBEE068-09|Hylaeus hyalinatus|COI-5P	A
FBHAP250-09|Hylaeus hyalinatus|COI-5P|KJ837420	A
BEEEE046-15|Hylaeus hyalinatus|COI-5P|KT074049	A
FBHAP251-09|Hylaeus hyalinatus|COI-5P|HM401446	A
GBACU2839-13|Hylaeus hyalinatus|COI-5P|KJ837356	A
NOBEE069-09|Hylaeus hyalinatus|COI-5P	A
SSGBC10053-14|Colletes hyalinus|COI-5P|MF906152	A
BEECA045-06|Colletes hyalinus|COI-5P	A
BBHYL385-10|Colletes hyalinus|COI-5P|JN293817	A
FBAPD889-11|Colletes hylaeiformis|COI-5P|KJ837953	A
FBAPB987-09|Colletes hylaeiformis|COI-5P|HQ948119	A
FBAPC640-11|Colletes hylaeiformis|COI-5P|KJ839489	A
FBAPC641-11|Colletes hylaeiformis|COI-5P|KJ838369	A
FBAPB988-09|Colletes hylaeiformis|COI-5P|HQ948120	A
FBAPD888-11|Colletes hylaeiformis|COI-5P|KJ838565	A
FBAPB985-09|Colletes hylaeiformis|COI-5P|HM401266	A
FBAPC642-11|Colletes hylaeiformis|COI-5P|KJ837893	A
ABBOL015-15|Hylaeus ikedai|COI-5P	A
ABBOL014-15|Hylaeus ikedai|COI-5P	A
BBHYK684-10|Hylaeus illinoisensis|COI-5P|JN293448	A
BEECB639-07|Hylaeus illinoisensis|COI-5P	A
BEECB641-07|Hylaeus illinoisensis|COI-5P	A
NZHYM438-10|Leioproctus imitatus|COI-5P	A
NZHYM437-10|Leioproctus imitatus|COI-5P	A
DLII1504-08|Hylaeus imparilis|COI-5P	A
DLII1482-08|Hylaeus imparilis|COI-5P	A
GBACU2825-13|Hylaeus imparilis|COI-5P|KJ838187	A
FBAPB984-09|Colletes impunctatus|COI-5P|HM401265	A
FBAPB982-09|Colletes impunctatus|COI-5P|HM401264	A
GBACU3694-13|Colletes impunctatus|COI-5P|KJ836414	A
GBACU3691-13|Colletes impunctatus|COI-5P|KJ836571	A
GBACU3692-13|Colletes impunctatus|COI-5P|KJ838169	A
GBACU1176-12|Colletes impunctatus|COI-5P|KJ836773	A
GBACU1178-12|Colletes impunctatus|COI-5P|KJ838765	A
BEECA178-06|Colletes impunctatus lacustris|COI-5P	A
BEECA610-06|Colletes impunctatus lacustris|COI-5P	A
BEECA177-06|Colletes impunctatus lacustris|COI-5P	A
FBAPC478-11|Colletes impunctatus|COI-5P|KJ837722	A
FBAPB983-09|Colletes impunctatus|COI-5P|HQ948118	A
BEECA179-06|Colletes impunctatus lacustris|COI-5P	A
GBACU3693-13|Colletes impunctatus|COI-5P|KJ836430	A
HCBNS207-03|Colletes inaequalis|COI-5P|FJ582203	A
HCBNS205-03|Colletes inaequalis|COI-5P|FJ582201	A
HCBNS206-03|Colletes inaequalis|COI-5P|FJ582202	A
UPOLB490-09|Colletes inaequalis|COI-5P	A
BEECB657-07|Colletes inaequalis|COI-5P	A
SMTPF7549-14|Colletes inaequalis|COI-5P|KR881043	A
ABBOL016-15|Hylaeus incomitatus|COI-5P	A
ABBOL017-15|Hylaeus incomitatus|COI-5P	A
GBACU3550-13|Hylaeus incongruus|COI-5P|KJ839127	A
GBACU1363-12|Hylaeus incongruus|COI-5P|KJ837097	A
GBAH4164-09|Chilicola inermis|COI-5P|DQ872728	A
BOFTW223-09|Chilicola inermis|COI-5P|KX821077	A
BOFTW211-09|Chilicola inermis|COI-5P|KX820815	A
HYLHI134-08|Hylaeus inquilina|COI-5P|FJ411649	A
HYLHI135-08|Hylaeus inquilina|COI-5P|FJ411648	A
ABBOL007-15|Hylaeus insularum|COI-5P	A
ABBOL008-15|Hylaeus insularum|COI-5P	A
HYLHI003-08|Hylaeus insularum|COI-5P|FJ411650	A
FBAPC508-11|Hylaeus intermedius|COI-5P|KJ839360	A
FBAPC510-11|Hylaeus intermedius|COI-5P|KJ837028	A
FBAPD775-11|Hylaeus intermedius|COI-5P|KJ838687	A
ABEE041-17|Hylaeus intermedius|COI-5P	A
GBACU3574-13|Hylaeus intermedius|COI-5P|KJ839306	A
GBACU034-12|Hylaeus intermedius|COI-5P|KJ837822	A
GBAH1838-06|Colletes intricans|COI-5P|DQ085545	A
GBAH4189-09|Xeromelissa irwini|COI-5P|DQ872703	A
ABBOL188-15|Colletes jankowskyi|COI-5P	A
GBMIN74626-17|Colletes jankowskyi|COI-5P|LC102400	A
GBMIN74627-17|Colletes jankowskyi|COI-5P|LC102399	A
ABBOL187-15|Colletes jankowskyi|COI-5P	A
ABBOL186-15|Colletes jankowskyi|COI-5P	A
FBAPB589-09|Hylaeus kahri|COI-5P|KJ839377	A
FBAPB587-09|Hylaeus kahri|COI-5P|KJ838473	A
FBAPC512-11|Hylaeus kahri|COI-5P|KJ836973	A
FBAPC511-11|Hylaeus kahri|COI-5P|KJ838978	A
FBAPC509-11|Hylaeus kahri|COI-5P|KJ837684	A
FBAPB588-09|Hylaeus kahri|COI-5P|KJ838682	A
DLII1430-08|Hylaeus kahri|COI-5P	A
LASNA761-08|Spinolapis kalen|COI-5P|KX820377	A
LASNA667-08|Spinolapis kalen|COI-5P|KX820676	A
BOWGF2881-13|Chilicola katherinae|COI-5P|KX051552	A
BOWGF2882-13|Chilicola katherinae|COI-5P|KX051502	A
NTCOL239-15|Chilicola katherinae|COI-5P|KX051534	A
HYLHI139-08|Hylaeus kauaiensis|COI-5P|FJ411651	A
HYLHI137-08|Hylaeus kauaiensis|COI-5P|FJ411653	A
HYLHI138-08|Hylaeus kauaiensis|COI-5P|FJ411652	A
HYLHI136-08|Hylaeus kauaiensis|COI-5P|FJ411654	A
BEECA142-06|Colletes kincaidii|COI-5P	A
BEECA141-06|Colletes kincaidii|COI-5P	A
OPPEG2632-17|Colletes kincaidii|COI-5P	A
BEECA283-06|Colletes kincaidii|COI-5P	A
BBHYL318-10|Colletes kincaidii|COI-5P|JN293763	A
BEECB728-07|Colletes kincaidii|COI-5P	A
OPPEG2520-17|Colletes kincaidii|COI-5P	A
BEECB650-07|Colletes kincaidii|COI-5P	A
HYLHI143-08|Hylaeus kokeensis|COI-5P|FJ411655	A
HYLHI142-08|Hylaeus kokeensis|COI-5P|FJ411656	A
HYLHI141-08|Hylaeus kokeensis|COI-5P|FJ411657	A
HYLHI140-08|Hylaeus kokeensis|COI-5P|FJ411658	A
HYLHI145-08|Hylaeus kona|COI-5P|FJ411659	A
HYLHI144-08|Hylaeus kona|COI-5P|FJ411660	A
HYLHI146-08|Hylaeus kuakea|COI-5P|FJ411661	A
HYLHI148-08|Hylaeus kukui|COI-5P|FJ411663	A
HYLHI147-08|Hylaeus kukui|COI-5P|FJ411664	A
HYLHI149-08|Hylaeus kukui|COI-5P|FJ411662	A
GBMIN29282-13|Callohesma lacteipennis|COI-5P|JN603420	A
HYLHI154-08|Hylaeus laetus|COI-5P|FJ411676	A
HYLHI150-08|Hylaeus laetus|COI-5P|FJ411680	A
HYLHI153-08|Hylaeus laetus|COI-5P|FJ411677	A
HYLHI152-08|Hylaeus laetus|COI-5P|FJ411678	A
HYLHI151-08|Hylaeus laetus|COI-5P|FJ411679	A
HYLHI164-08|Hylaeus laetus|COI-5P|FJ411666	A
HYLHI161-08|Hylaeus laetus|COI-5P|FJ411669	A
HYLHI163-08|Hylaeus laetus|COI-5P|FJ411667	A
HYLHI162-08|Hylaeus laetus|COI-5P|FJ411668	A
HYLHI165-08|Hylaeus laetus|COI-5P|FJ411665	A
HYLHI160-08|Hylaeus laetus|COI-5P|FJ411670	A
HYLHI156-08|Hylaeus laetus|COI-5P|FJ411674	A
HYLHI158-08|Hylaeus laetus|COI-5P|FJ411672	A
HYLHI155-08|Hylaeus laetus|COI-5P|FJ411675	A
HYLHI157-08|Hylaeus laetus|COI-5P|FJ411673	A
HYLHI159-08|Hylaeus laetus|COI-5P|FJ411671	A
SDBEE134-12|Colletes LaJolla Sp.1|COI-5P	A
BEECC689-09|Colletes larreae|COI-5P	A
BEECC691-09|Colletes larreae|COI-5P	A
BEECC692-09|Colletes larreae|COI-5P	A
LASNA653-08|Xeromelissa laureli|COI-5P	A
LASNA559-08|Xeromelissa laureli|COI-5P|KX820674	A
LASNA654-08|Xeromelissa laureli|COI-5P	A
LASNA558-08|Xeromelissa laureli|COI-5P|KX820915	A
GBAH4184-09|Xeromelissa laureli|COI-5P|DQ872708	A
SCRAP025-14|Scrapter leonis|COI-5P	A
UPOLB679-09|Hylaeus leptocephalus|COI-5P	A
BEECA195-06|Hylaeus leptocephalus|COI-5P	A
MBIOH637-13|Hylaeus leptocephalus|COI-5P|KR801064	A
MBIOC224-13|Hylaeus leptocephalus|COI-5P|KR783750	A
UPOLB684-09|Hylaeus leptocephalus|COI-5P	A
BBHYA2212-12|Hylaeus leptocephalus|COI-5P	A
BBHYA1576-12|Hylaeus leptocephalus|COI-5P	A
BBHYA1573-12|Hylaeus leptocephalus|COI-5P	A
BBHYA2213-12|Hylaeus leptocephalus|COI-5P	A
UPOLL870-09|Hylaeus leptocephalus|COI-5P	A
PREXP043-14|Hylaeus leptocephalus|COI-5P|KR887506	A
FBAPD821-11|Hylaeus leptocephalus|COI-5P|KJ838113	A
FBHAP253-09|Hylaeus leptocephalus|COI-5P|HM401447	A
ABEE118-17|Hylaeus leptocephalus|COI-5P	A
ABEE119-17|Hylaeus leptocephalus|COI-5P	A
BOWGF3034-14|Chilicola lickana|COI-5P|KX051558	A
GBACU2115-13|Hylaeus lineolatus|COI-5P|KJ838351	A
FBACB728-11|Hylaeus lineolatus|COI-5P|KJ838325	A
GBACU2836-13|Hylaeus lineolatus|COI-5P|KJ836434	A
GBACU027-12|Hylaeus lineolatus|COI-5P|KJ836517	A
GBACU2833-13|Hylaeus lineolatus|COI-5P|KJ837489	A
GBACU3712-13|Hylaeus lineolatus|COI-5P|KJ837701	A
FBAPB596-09|Hylaeus lineolatus|COI-5P|HM401173	A
GBACU2835-13|Hylaeus lineolatus|COI-5P|KJ836825	A
FBAPC948-11|Hylaeus lineolatus|COI-5P|KJ836486	A
GBACU024-12|Hylaeus lineolatus|COI-5P|KJ836636	A
GBACU026-12|Hylaeus lineolatus|COI-5P|KJ837975	A
GBACU2834-13|Hylaeus lineolatus|COI-5P|KJ839031	A
FBAPB595-09|Hylaeus lineolatus|COI-5P|HM401172	A
GBACU025-12|Hylaeus lineolatus|COI-5P|KJ838080	A
GBACU3549-13|Hylaeus lineolatus|COI-5P|KJ839549	A
ABEE212-17|Hylaeus lineolatus|COI-5P	A
GBAH4192-09|Geodiscelis longiceps|COI-5P|DQ872700	A
HYLHI168-08|Hylaeus longiceps|COI-5P|FJ411689	A
HYLHI167-08|Hylaeus longiceps|COI-5P|FJ411690	A
HYLHI166-08|Hylaeus longiceps|COI-5P|FJ411691	A
HYLHI170-08|Hylaeus longiceps|COI-5P|FJ411687	A
HYLHI169-08|Hylaeus longiceps|COI-5P|FJ411688	A
HYLHI171-08|Hylaeus longiceps|COI-5P|FJ411686	A
HYLHI172-08|Hylaeus longiceps|COI-5P|FJ411685	A
HYLHI175-08|Hylaeus longiceps|COI-5P|FJ411682	A
HYLHI174-08|Hylaeus longiceps|COI-5P|FJ411683	A
HYLHI173-08|Hylaeus longiceps|COI-5P|FJ411684	A
HYLHI176-08|Hylaeus longiceps|COI-5P|FJ411681	A
BEECC681-09|Colletes louisae|COI-5P	A
SDBEE139-12|Colletes louisae|COI-5P	A
BEECC682-09|Colletes louisae|COI-5P	A
BEECC683-09|Colletes louisae|COI-5P	A
AUSBS373-13|Callohesma lucida|COI-5P	A
AUSCA703-12|Callohesma lucida|COI-5P	A
LASNA795-08|Scrapter luridus|COI-5P	A
LASNA701-08|Scrapter luridus|COI-5P	A
GBMIN12176-13|Colletes luzhouensis|COI-5P|KC469683	A
GBMIN12209-13|Colletes luzhouensis|COI-5P|KC469664	A
GBMIN12175-13|Colletes luzhouensis|COI-5P|KC469685	A
GBMIN12211-13|Colletes luzhouensis|COI-5P|KC469660	A
GBMIN12205-13|Colletes luzhouensis|COI-5P|KC469672	A
GBMIN12189-13|Colletes luzhouensis|COI-5P|KC469657	A
GBMIN12188-13|Colletes luzhouensis|COI-5P|KC469659	A
GBMIN12199-13|Colletes luzhouensis|COI-5P|KC469684	A
GBMIN12201-13|Colletes luzhouensis|COI-5P|KC469680	A
GBMIN12186-13|Colletes luzhouensis|COI-5P|KC469663	A
GBMIN12178-13|Colletes luzhouensis|COI-5P|KC469679	A
GBMIN12182-13|Colletes luzhouensis|COI-5P|KC469671	A
GBMIN12177-13|Colletes luzhouensis|COI-5P|KC469681	A
GBMIN12202-13|Colletes luzhouensis|COI-5P|KC469678	A
GBMIN12187-13|Colletes luzhouensis|COI-5P|KC469661	A
GBMIN12204-13|Colletes luzhouensis|COI-5P|KC469674	A
GBMIN12183-13|Colletes luzhouensis|COI-5P|KC469669	A
GBMIN12179-13|Colletes luzhouensis|COI-5P|KC469677	A
GBMIN12200-13|Colletes luzhouensis|COI-5P|KC469682	A
GBMIN12180-13|Colletes luzhouensis|COI-5P|KC469675	A
GBMIN12203-13|Colletes luzhouensis|COI-5P|KC469676	A
GBMIN12210-13|Colletes luzhouensis|COI-5P|KC469662	A
GBMIN12206-13|Colletes luzhouensis|COI-5P|KC469670	A
GBMIN12212-13|Colletes luzhouensis|COI-5P|KC469658	A
GBMIN12181-13|Colletes luzhouensis|COI-5P|KC469673	A
GBMIN12213-13|Colletes luzhouensis|COI-5P|KC469656	A
AUSBS006-12|Hylaeus maiellus|COI-5P	A
HYLNS003-13|Hylaeus makaha|COI-5P|KF583514	A
HYLNS001-11|Hylaeus makaha|COI-5P|JN679599	A
GBAH4177-09|Xenochilicola mamigna|COI-5P|DQ872715	A
HYLNS004-13|Hylaeus mamo|COI-5P|KF583515	A
HYLHI177-08|Hylaeus mana|COI-5P|FJ411692	A
BWTWO1393-10|Chilicola mantagua|COI-5P|HQ938077	A
BWTWO1390-10|Chilicola mantagua|COI-5P|HQ938075	A
BWTWO1392-10|Chilicola mantagua|COI-5P|HQ938076	A
BWTWO004-09|Chilicola mantagua|COI-5P|HQ937886	A
BOTWA1412-11|Chilicola mantagua|COI-5P|KX051557	A
BWTWO1391-10|Chilicola mantagua|COI-5P|KX051519	A
FBAPB537-09|Colletes marginatus|COI-5P|KJ837930	A
FBAPB534-09|Colletes marginatus|COI-5P|KJ839430	A
FBAPB536-09|Colletes marginatus|COI-5P|KJ837310	A
FBAPD864-11|Colletes marginatus|COI-5P|KJ837247	A
FBAPB535-09|Colletes marginatus|COI-5P|KJ837775	A
BOWGF3014-14|Chilicola mavida|COI-5P|KX051527	A
BOWGF3029-14|Chilicola mavida|COI-5P|KX051543	A
BOWGF3030-14|Chilicola mavida|COI-5P|KX051549	A
BOWGF3033-14|Chilicola mavida|COI-5P|KX051498	A
BOWGF3072-14|Chilicola mayu|COI-5P|KX051535	A
BOWGF3317-14|Chilicola mayu|COI-5P|KX051538	A
BEECA238-06|Hylaeus mesillae|COI-5P	A
BEECA236-06|Hylaeus mesillae|COI-5P	A
BEEMH175-06|Hylaeus mesillae|COI-5P|MG441207	A
BEEMH235-06|Hylaeus mesillae|COI-5P|MG439946	A
BEEMH238-06|Hylaeus mesillae|COI-5P|MG443628	A
BEEMH237-06|Hylaeus mesillae|COI-5P|MG439252	A
HDBNS018-03|Hylaeus mesillae cressoni|COI-5P|FJ582258	A
HDBNS013-03|Hylaeus mesillae cressoni|COI-5P|FJ582257	A
RBINA4510-13|Hylaeus mesillae|COI-5P|KR873933	A
UPOLB729-09|Hylaeus mesillae|COI-5P	A
UPOLB185-09|Hylaeus mesillae|COI-5P	A
UPOLB734-09|Hylaeus mesillae|COI-5P	A
JSHYO334-11|Hylaeus mesillae cressoni|COI-5P|KR802092	A
OPPFM2623-17|Hylaeus mesillae|COI-5P	A
JSHYP125-11|Hylaeus mesillae cressoni|COI-5P|KR806864	A
JSHYO881-11|Hylaeus mesillae cressoni|COI-5P|KR789542	A
UPOLB728-09|Hylaeus mesillae|COI-5P	A
OPPEE5382-17|Hylaeus mesillae|COI-5P	A
OPPOC1348-17|Hylaeus mesillae|COI-5P	A
ERPIR170-12|Hylaeus mesillae|COI-5P|KR798743	A
UPOLB678-09|Hylaeus mesillae|COI-5P	A
OPPFM574-17|Hylaeus mesillae|COI-5P	A
UPOLB601-09|Hylaeus mesillae|COI-5P	A
OPPOC1469-17|Hylaeus mesillae|COI-5P	A
BUSA146-05|Hylaeus mesillae|COI-5P	A
UPOLB737-09|Hylaeus mesillae|COI-5P	A
UPOLB736-09|Hylaeus mesillae|COI-5P	A
UPOLB692-09|Hylaeus mesillae|COI-5P	A
JSHYP129-11|Hylaeus mesillae cressoni|COI-5P|KR805825	A
JSHYO957-11|Hylaeus mesillae cressoni|COI-5P|KR800382	A
OPPOG103-17|Hylaeus mesillae|COI-5P	A
BEECB643-07|Hylaeus mesillae cressoni|COI-5P	A
BUSA147-05|Hylaeus mesillae|COI-5P	A
JSHYO958-11|Hylaeus mesillae|COI-5P|KR799967	A
BEECA237-06|Hylaeus mesillae|COI-5P	A
CRHII873-16|Hylaeus mesillae|COI-5P|MG444659	A
CRHIE478-15|Hylaeus mesillae|COI-5P|MG448543	A
MBIOE1075-13|Hylaeus mesillae|COI-5P|KR788415	A
CRHIA014-15|Hylaeus mesillae|COI-5P|MG446930	A
RBINA1800-13|Hylaeus mesillae|COI-5P|KR891863	A
SSJAE6851-13|Hylaeus mesillae1|COI-5P|KR887466	A
BOFWM007-08|Hylaeus MEX01|COI-5P	A
BOFWM003-08|Colletes MEX03|COI-5P	A
BOFWM001-08|Colletes MEX11|COI-5P	A
BOFWM002-08|Colletes MEX12|COI-5P	A
BOFWM004-08|Colletes MEXsp01|COI-5P	A
HYLHI179-08|Hylaeus mimicus|COI-5P|FJ411694	A
HYLHI180-08|Hylaeus mimicus|COI-5P|FJ411693	A
BEECC383-08|Colletes mitchelli|COI-5P	A
BEECC384-08|Colletes mitchelli|COI-5P	A
GBAH4211-09|Mourecotelles mixta|COI-5P|DQ872681	A
FBAPD672-11|Colletes mlokossewiczi|COI-5P|KJ839767	A
FBAPD671-11|Colletes mlokossewiczi|COI-5P|KJ837366	A
GBACU3609-13|Colletes mlokossewiczi|COI-5P|KJ837094	A
UPOLB457-09|Hylaeus modestus|COI-5P	A
UPOLB445-09|Hylaeus modestus|COI-5P	A
CNWBH406-13|Hylaeus modestus|COI-5P|KR783511	A
BBHYM343-09|Hylaeus modestus|COI-5P|HM374795	A
BBHYK515-10|Hylaeus modestus|COI-5P|JN293357	A
BBHYJ423-10|Hylaeus modestus|COI-5P|JN293021	A
BBHYK617-10|Hylaeus modestus|COI-5P|JN293399	A
BBHYI648-10|Hylaeus modestus|COI-5P|JN292634	A
BBHYM361-09|Hylaeus modestus|COI-5P|HM374809	A
BBHYI543-10|Hylaeus modestus|COI-5P|JN292541	A
BBHYA1535-12|Hylaeus modestus|COI-5P	A
SSWLE6436-13|Hylaeus modestus|COI-5P|KR891558	A
SSWLE7683-13|Hylaeus modestus|COI-5P|KR876003	A
SSJAE11036-13|Hylaeus modestus|COI-5P|KR876975	A
SSJAB3290-13|Hylaeus modestus|COI-5P|KR896394	A
SSWLE6427-13|Hylaeus modestus|COI-5P|KR890154	A
SSJAE11038-13|Hylaeus modestus|COI-5P|KR875333	A
SSWLD093-13|Hylaeus modestus|COI-5P|KR881562	A
SSEIB4371-13|Hylaeus modestus|COI-5P|KR883609	A
SSEIB4373-13|Hylaeus modestus|COI-5P|KR899597	A
SSEIB5179-13|Hylaeus modestus|COI-5P|KR875481	A
CNEIB001-12|Hylaeus modestus|COI-5P|MF903755	A
SSWLE2308-13|Hylaeus modestus|COI-5P|KR898504	A
BBHEC773-10|Hylaeus modestus|COI-5P|HQ928893	A
SSGBC7557-14|Hylaeus modestus|COI-5P|MF900725	A
CNYOJ1609-15|Hylaeus modestus|COI-5P|MF901982	A
SSGLA3482-15|Hylaeus modestus|COI-5P|MF902064	A
SSGBC5785-14|Hylaeus modestus|COI-5P|MF901128	A
SSKUB13360-15|Hylaeus modestus|COI-5P|MF900789	A
SSWLF3954-13|Hylaeus modestus|COI-5P|KR892791	A
SSPAA5074-13|Hylaeus modestus|COI-5P|KR880023	A
CNPKF2623-14|Hylaeus modestus|COI-5P|KR419450	A
HDBNS011-03|Hylaeus modestus|COI-5P|FJ582259	A
BBHYK035-10|Hylaeus modestus|COI-5P|KR798939	A
BOWGF013-08|Hylaeus modestus|COI-5P	A
POC040-05|Hylaeus modestus|COI-5P	A
BOWGF006-08|Hylaeus modestus|COI-5P	A
UPOLB237-09|Hylaeus modestus|COI-5P	A
BOWGF015-08|Hylaeus modestus|COI-5P	A
BOWGF012-08|Hylaeus modestus|COI-5P	A
BOWGF018-08|Hylaeus modestus|COI-5P	A
BOWGF019-08|Hylaeus modestus|COI-5P	A
UPOLB236-09|Hylaeus modestus|COI-5P	A
BOWGF011-08|Hylaeus modestus|COI-5P	A
BOWGF007-08|Hylaeus modestus|COI-5P	A
BOWGF008-08|Hylaeus modestus|COI-5P	A
DIAL140-06|Hylaeus modestus|COI-5P	A
BBHYE958-10|Hylaeus modestus|COI-5P|HQ552483	A
JSHYN410-11|Hylaeus modestus|COI-5P|KR806972	A
JSHYM848-11|Hylaeus modestus|COI-5P|KR784113	A
UPOLL881-09|Hylaeus modestus|COI-5P	A
BBHYF207-10|Hylaeus modestus|COI-5P|HQ552566	A
JSHYN153-11|Hylaeus modestus|COI-5P|KR801431	A
ERPIR216-12|Hylaeus modestus|COI-5P|KR784592	A
DIAL257-06|Hylaeus modestus|COI-5P	A
DIAL080-06|Hylaeus modestus|COI-5P	A
UPOLB043-09|Hylaeus modestus|COI-5P	A
DIAL285-06|Hylaeus modestus|COI-5P	A
UPOLB235-09|Hylaeus modestus|COI-5P	A
UPOLL819-09|Hylaeus modestus|COI-5P	A
BBHYA1622-12|Hylaeus modestus|COI-5P	A
DIAL230-06|Hylaeus modestus|COI-5P	A
BOWGF003-08|Hylaeus modestus|COI-5P	A
BEECB644-07|Hylaeus modestus|COI-5P	A
BEECA585-06|Hylaeus modestus|COI-5P	A
UPOLB124-09|Hylaeus modestus|COI-5P	A
UPOLB440-09|Hylaeus modestus|COI-5P	A
BEECB640-07|Hylaeus modestus|COI-5P	A
DIAL258-06|Hylaeus modestus|COI-5P	A
JSHYM419-11|Hylaeus modestus|COI-5P|KR806261	A
MBIOD967-13|Hylaeus modestus|COI-5P|KR800957	A
UPOLB376-09|Hylaeus modestus|COI-5P	A
UPOLC081-09|Hylaeus modestus|COI-5P	A
UPOLB708-09|Hylaeus modestus|COI-5P	A
CNTID4570-15|Hylaeus modestus|COI-5P|MF901709	A
CNTID4450-15|Hylaeus modestus|COI-5P|MF907233	A
CNTID4146-15|Hylaeus modestus|COI-5P|MF900541	A
RBINA4528-13|Hylaeus modestus|COI-5P|KR889748	A
CNEIB017-12|Hylaeus modestus|COI-5P	A
GMEGK621-14|Hylaeus moricei|COI-5P	A
GMEGK644-14|Hylaeus moricei|COI-5P	A
FBAPB597-09|Hylaeus moricei|COI-5P|HM401174	A
FBAPB598-09|Hylaeus moricei|COI-5P|HM401175	A
FBAPB599-09|Hylaeus moricei|COI-5P|HM401176	A
GBACU1366-12|Hylaeus moricei|COI-5P|KJ837824	A
GBAH4186-09|Xeromelissa mucar|COI-5P|DQ872706	A
GBAH7136-10|Hylaeus muranus|COI-5P|FJ656061	A
GBAH7137-10|Hylaeus muranus|COI-5P|FJ656060	A
HYLHS012-09|Hylaeus muranus|COI-5P	A
HYLHS011-09|Hylaeus muranus|COI-5P	A
HYLHS013-09|Hylaeus muranus|COI-5P	A
HYLHS008-09|Hylaeus muranus|COI-5P	A
GBAH7135-10|Hylaeus muranus|COI-5P|FJ656062	A
HYLHI182-08|Hylaeus muranus|COI-5P|FJ411697	A
HYLHS010-09|Hylaeus muranus|COI-5P	A
HYLHI181-08|Hylaeus muranus|COI-5P|FJ411698	A
HYLHS014-09|Hylaeus muranus|COI-5P	A
HYLHI183-08|Hylaeus muranus|COI-5P|FJ411696	A
HYLHS009-09|Hylaeus muranus|COI-5P	A
GBAH7138-10|Hylaeus muranus|COI-5P|FJ656059	A
HYLHI184-08|Hylaeus mutatus|COI-5P|FJ411703	A
HYLHI187-08|Hylaeus mutatus|COI-5P|FJ411700	A
HYLHI188-08|Hylaeus mutatus|COI-5P|FJ411699	A
HYLHI185-08|Hylaeus mutatus|COI-5P|FJ411702	A
HYLHI186-08|Hylaeus mutatus|COI-5P|FJ411701	A
BOFTW260-09|Xeromelissa n. sp. eyzaguirre|COI-5P|KX820784	A
BOFTW272-09|Xeromelissa n. sp. cincticornis|COI-5P|KX820389	A
BOFTW248-09|Xeromelissa n. sp. elguetai|COI-5P|KX821097	A
FBAPB540-09|Colletes nasutus|COI-5P|HM401158	A
FBAPB541-09|Colletes nasutus|COI-5P|HM401159	A
FBAPB539-09|Colletes nasutus|COI-5P|HM401157	A
FBAPB538-09|Colletes nasutus|COI-5P|KJ838914	A
GBACU966-12|Colletes nasutus|COI-5P|KJ837890	A
FBAPC643-11|Colletes nasutus|COI-5P|KJ836531	A
BOWGF2994-14|Chilicola neffi|COI-5P|KX051507	A
BOWGF3321-14|Chilicola neffi|COI-5P|KX051551	A
BOWGF3422-14|Chilicola neffi|COI-5P|KX051529	A
BEECC004-08|Hylaeus nelumbonis|COI-5P	A
SCRAP037-14|Scrapter niger|COI-5P	A
BOWGF086-08|Scrapter niger|COI-5P	A
BOWGF087-08|Scrapter niger|COI-5P	A
BOWGF062-08|Scrapter niger|COI-5P	A
BOWGF063-08|Scrapter niger|COI-5P	A
BEECA440-06|Colletes nigrifrons|COI-5P	A
BEECA429-06|Colletes nigrifrons|COI-5P	A
JSYKA210-10|Colletes nigrifrons|COI-5P|HM860380	A
GMGMN1406-14|Hylaeus nigritus|COI-5P	A
GBACU2798-13|Hylaeus nigritus|COI-5P|KJ837074	A
FBAPC502-11|Hylaeus nigritus|COI-5P|KJ838326	A
FBAPC501-11|Hylaeus nigritus|COI-5P|KJ836948	A
GBACU014-12|Hylaeus nigritus|COI-5P|KJ838096	A
GBACU015-12|Hylaeus nigritus|COI-5P|KJ837362	A
GMGMN1336-14|Hylaeus nigritus|COI-5P	A
GBACU2797-13|Hylaeus nigritus|COI-5P|KJ838530	A
FBHAP257-09|Hylaeus nigritus|COI-5P|HM401448	A
FBAPD765-11|Hylaeus nigritus|COI-5P|KJ838011	A
FBHAP256-09|Hylaeus nigritus|COI-5P|KJ839606	A
GMGMC651-14|Hylaeus nigritus|COI-5P	A
GBMIN29274-13|Scrapter nitidus|COI-5P|JN603436	A
SCRAP049-14|Scrapter nitidus|COI-5P	A
BOWGF059-08|Scrapter nitidus|COI-5P	A
BOWGF057-08|Scrapter nitidus|COI-5P	A
FBAPB600-09|Hylaeus nivalis|COI-5P|HM401177	A
FBAPB601-09|Hylaeus nivalis|COI-5P|HM401178	A
FBAPB602-09|Hylaeus nivalis|COI-5P|KJ838245	A
FBAPB603-09|Hylaeus nivalis|COI-5P|HM401179	A
HYLHI190-08|Hylaeus nivicola|COI-5P|FJ411709	A
HYLHI191-08|Hylaeus nivicola|COI-5P|FJ411708	A
HYLHI189-08|Hylaeus nivicola|COI-5P|FJ411710	A
HYLHI269-08|Hylaeus nivicola|COI-5P|FJ411705	A
HYLHI270-08|Hylaeus nivicola|COI-5P|FJ411704	A
HYLHI263-08|Hylaeus nivicola|COI-5P|FJ411706	A
HYLHI262-08|Hylaeus nivicola|COI-5P|FJ411707	A
ABBOL006-15|Hylaeus noomen|COI-5P	A
ABBOL005-15|Hylaeus noomen|COI-5P	A
HYLHI276-08|Hylaeus noomen|COI-5P|FJ411711	A
GBAH4190-09|Xeromelissa nortina|COI-5P|DQ872702	A
BEECB197-07|Caupolicana notabilis|COI-5P	A
GBAH7384-13|Meroglossa nr. eucalypti PK2011|COI-5P|JN578915	A
HYLHI195-08|Hylaeus ombrias|COI-5P|FJ411713	A
HYLHI192-08|Hylaeus ombrias|COI-5P|FJ411716	A
HYLHI196-08|Hylaeus ombrias|COI-5P|FJ411712	A
HYLHI194-08|Hylaeus ombrias|COI-5P|FJ411714	A
HYLHI193-08|Hylaeus ombrias|COI-5P|FJ411715	A
BEECC008-08|Hylaeus ornatus|COI-5P	A
BEECC006-08|Hylaeus ornatus|COI-5P	A
BEECC009-08|Hylaeus ornatus|COI-5P	A
BEECC007-08|Hylaeus ornatus|COI-5P	A
BBHYE443-10|Hylaeus ornatus|COI-5P|HQ929259	A
BBHYE411-10|Hylaeus ornatus|COI-5P|HQ552361	A
UPOLL693-09|Hylaeus ornatus|COI-5P	A
SCRAP074-14|Scrapter oxalensis|COI-5P	A
SCRAP003-14|Scrapter oxalicus|COI-5P	A
SCRAP086-14|Scrapter oxalicus|COI-5P	A
SCRAP051-14|Scrapter oxaliphilus|COI-5P	A
SCRAP063-14|Scrapter oxaliphilus|COI-5P	A
SCRAP004-14|Scrapter oxalis|COI-5P	A
SCRAP016-14|Scrapter oxalis|COI-5P	A
SCRAP087-14|Scrapter oxalis|COI-5P	A
SCRAP028-14|Scrapter oxalis|COI-5P	A
SCRAP040-14|Scrapter oxalissimus|COI-5P	A
SCRAP064-14|Scrapter oxaloides|COI-5P	A
SCRAP076-14|Scrapter oxaloides|COI-5P	A
SCRAP017-14|Scrapter oxaloides|COI-5P	A
NZHYM429-10|Nesocolletes paahaumaa|COI-5P	A
NZHYM428-10|Nesocolletes paahaumaa|COI-5P|JN265887	A
NZHYM430-10|Nesocolletes paahaumaa|COI-5P	A
BOWGF2998-14|Chilicola packeri|COI-5P|KX051530	A
BOWGF2997-14|Chilicola packeri|COI-5P|KX051506	A
BOWGF2999-14|Chilicola packeri|COI-5P|KX051521	A
BOWGF2995-14|Chilicola packeri|COI-5P|KX051509	A
NZHYM440-10|Leioproctus pango|COI-5P	A
NZHYM442-10|Leioproctus pango|COI-5P	A
NZHYM441-10|Leioproctus pango|COI-5P	A
NZHYM439-10|Leioproctus pango|COI-5P	A
AUSBS369-13|Euryglossa panmicta|COI-5P	A
AUSBS323-13|Euryglossa panmicta|COI-5P	A
AUSBS211-13|Euhesma pantoni|COI-5P	A
AUSBS210-13|Euhesma pantoni|COI-5P	A
AUSBS203-13|Euhesma pantoni|COI-5P	A
HYLHI264-08|Hylaeus paradoxicus|COI-5P|FJ411718	A
HYLHI271-08|Hylaeus paradoxicus|COI-5P|FJ411717	A
HYLHI197-08|Hylaeus paradoxicus|COI-5P|FJ411720	A
HYLHI198-08|Hylaeus paradoxicus|COI-5P|FJ411719	A
GBAH4207-09|Colletes pascoensis|COI-5P|DQ872685	A
GBAH4170-09|Chilicola patagonica|COI-5P|DQ872722	A
ABBOL004-15|Colletes patellatus|COI-5P	A
ABBOL003-15|Colletes patellatus|COI-5P	A
GBACU3714-13|Hylaeus paulus|COI-5P|KJ839241	A
GBACU2102-13|Hylaeus paulus|COI-5P|KJ839754	A
GMGMA1452-14|Hylaeus paulus|COI-5P	A
FBAPD843-11|Hylaeus paulus|COI-5P|KJ839295	A
GBACU2100-13|Hylaeus paulus|COI-5P|KJ838292	A
GBACU2101-13|Hylaeus paulus|COI-5P|KJ837780	A
FBAPD845-11|Hylaeus paulus|COI-5P|KJ838893	A
GBACU3715-13|Hylaeus paulus|COI-5P|KJ839084	A
FBAPD844-11|Hylaeus paulus|COI-5P|KJ838224	A
FBHAP262-09|Hylaeus paulus|COI-5P|HM401449	A
FBHAP261-09|Hylaeus paulus|COI-5P|KJ838562	A
FBAPD789-11|Hylaeus pectoralis|COI-5P|KJ837295	A
FBAPD788-11|Hylaeus pectoralis|COI-5P|KJ839242	A
FBAPD785-11|Hylaeus pectoralis|COI-5P|KJ837644	A
GBAH4180-09|Xeromelissa pedroi|COI-5P|DQ872712	A
HYLHI200-08|Hylaeus pele|COI-5P|FJ411724	A
HYLHI202-08|Hylaeus pele|COI-5P|FJ411722	A
HYLHI203-08|Hylaeus pele|COI-5P|FJ411721	A
HYLHI199-08|Hylaeus pele|COI-5P|FJ411725	A
HYLHI201-08|Hylaeus pele|COI-5P|FJ411723	A
BOMNG095-13|Chilicola penai|COI-5P|KX070751	A
GBAH7407-13|Hylaeus pergibbosus|COI-5P|JN578891	A
GBAH7398-13|Hylaeus perhumilis|COI-5P|JN578901	A
NZHYM451-10|Hylaeus perhumilis|COI-5P	A
NZHYM450-10|Hylaeus perhumilis|COI-5P	A
NZHYM453-10|Hylaeus perhumilis|COI-5P	A
BEECB457-07|Colletes petalostemonis|COI-5P	A
ABBOL012-15|Hylaeus pfankuchi|COI-5P	A
FBAPB610-09|Hylaeus pfankuchi|COI-5P|HM401183	A
FBAPB609-09|Hylaeus pfankuchi|COI-5P|HM401182	A
FBAPB608-09|Hylaeus pfankuchi|COI-5P|HM401181	A
FBAPB607-09|Hylaeus pfankuchi|COI-5P|HM401180	A
ABBOL011-15|Hylaeus pfankuchi|COI-5P	A
BEECB870-07|Colletes phaceliae|COI-5P	A
BEECB1026-07|Colletes phaceliae|COI-5P	A
BEECB793-07|Colletes phaceliae|COI-5P	A
BBHYL387-10|Colletes phaceliae|COI-5P|JN293819	A
BBHYL377-10|Colletes phaceliae|COI-5P|JN293812	A
BBHYL388-10|Colletes phaceliae|COI-5P|JN293820	A
BEECA264-06|Colletes phaceliae|COI-5P	A
TTHYW174-08|Colletes phaceliae|COI-5P|KR901612	A
CNJAE1188-12|Colletes phaceliae|COI-5P|KR795914	A
BBHYA2154-12|Colletes phaceliae|COI-5P	A
BBHYA2122-12|Hylaeus pictipes|COI-5P	A
GBACU1446-12|Hylaeus pictipes|COI-5P|KJ838603	A
BBHYA2121-12|Hylaeus pictipes|COI-5P	A
BBHYA1532-12|Hylaeus pictipes|COI-5P	A
GBACU2846-13|Hylaeus pictipes|COI-5P|KJ838569	A
FBAPD793-11|Hylaeus pictipes|COI-5P|KJ837552	A
ABEE042-17|Hylaeus pictipes|COI-5P	A
FBAPB613-09|Hylaeus pictipes|COI-5P|HQ563102	A
BEEEE197-15|Hylaeus pictipes|COI-5P	A
ABEE113-17|Hylaeus pictipes|COI-5P	A
ABEE121-17|Hylaeus pictipes|COI-5P	A
ABEE122-17|Hylaeus pictipes|COI-5P	A
FBAPB616-09|Hylaeus pilosulus|COI-5P|HQ948063	A
GBAH4198-09|Euhesma platyrhina|COI-5P|DQ872694	A
GBAH4161-09|Hylaeus proximus|COI-5P|DQ872731	A
BOFTW142-08|Hylaeus PRY01|COI-5P	A
HYLHI205-08|Hylaeus psammobius|COI-5P|FJ411726	A
HYLHI204-08|Hylaeus psammobius|COI-5P|FJ411727	A
GBAH7112-10|Hylaeus pubescens|COI-5P|FJ656085	A
HYLHS037-09|Hylaeus pubescens|COI-5P	A
GBAH7113-10|Hylaeus pubescens|COI-5P|FJ656084	A
HYLHS036-09|Hylaeus pubescens|COI-5P	A
GBAH7124-10|Hylaeus pubescens|COI-5P|FJ656073	A
HYLHS025-09|Hylaeus pubescens|COI-5P	A
GBAH7115-10|Hylaeus pubescens|COI-5P|FJ656082	A
HYLHS035-09|Hylaeus pubescens|COI-5P	A
HYLHS034-09|Hylaeus pubescens|COI-5P	A
GBAH7114-10|Hylaeus pubescens|COI-5P|FJ656083	A
HYLHS033-09|Hylaeus pubescens|COI-5P	A
GBAH7116-10|Hylaeus pubescens|COI-5P|FJ656081	A
HYLHS043-09|Hylaeus pubescens|COI-5P	A
GBAH7107-10|Hylaeus pubescens|COI-5P|FJ656090	A
GBAH7121-10|Hylaeus pubescens|COI-5P|FJ656076	A
HYLHS028-09|Hylaeus pubescens|COI-5P	A
HYLHI208-08|Hylaeus pubescens|COI-5P|FJ411730	A
GBAH7118-10|Hylaeus pubescens|COI-5P|FJ656079	A
HYLHS031-09|Hylaeus pubescens|COI-5P	A
HYLHS019-09|Hylaeus pubescens|COI-5P	A
GBAH7130-10|Hylaeus pubescens|COI-5P|FJ656067	A
HYLHS044-09|Hylaeus pubescens|COI-5P	A
GBAH7106-10|Hylaeus pubescens|COI-5P|FJ656091	A
HYLHI206-08|Hylaeus pubescens|COI-5P|FJ411732	A
HYLHI207-08|Hylaeus pubescens|COI-5P|FJ411731	A
HYLHI209-08|Hylaeus pubescens|COI-5P|FJ411729	A
GBAH7126-10|Hylaeus pubescens|COI-5P|FJ656071	A
HYLHS023-09|Hylaeus pubescens|COI-5P	A
HYLHS041-09|Hylaeus pubescens|COI-5P	A
GBAH7129-10|Hylaeus pubescens|COI-5P|FJ656068	A
GBAH7111-10|Hylaeus pubescens|COI-5P|FJ656086	A
GBAH7131-10|Hylaeus pubescens|COI-5P|FJ656066	A
HYLHS015-09|Hylaeus pubescens|COI-5P	A
HYLHS017-09|Hylaeus pubescens|COI-5P	A
GBAH7123-10|Hylaeus pubescens|COI-5P|FJ656074	A
GBAH7134-10|Hylaeus pubescens|COI-5P|FJ656063	A
HYLHS029-09|Hylaeus pubescens|COI-5P	A
HYLHS038-09|Hylaeus pubescens|COI-5P	A
HYLHI210-08|Hylaeus pubescens|COI-5P|FJ411728	A
HYLHS018-09|Hylaeus pubescens|COI-5P	A
HYLHS020-09|Hylaeus pubescens|COI-5P	A
HYLHS026-09|Hylaeus pubescens|COI-5P	A
GBAH7120-10|Hylaeus pubescens|COI-5P|FJ656077	A
GBAH7132-10|Hylaeus pubescens|COI-5P|FJ656065	A
HYLHS016-09|Hylaeus pubescens|COI-5P	A
GBAH7127-10|Hylaeus pubescens|COI-5P|FJ656070	A
HYLHS022-09|Hylaeus pubescens|COI-5P	A
GBAH7128-10|Hylaeus pubescens|COI-5P|FJ656069	A
GBAH7125-10|Hylaeus pubescens|COI-5P|FJ656072	A
HYLHS024-09|Hylaeus pubescens|COI-5P	A
HYLHS021-09|Hylaeus pubescens|COI-5P	A
GBAH7133-10|Hylaeus pubescens|COI-5P|FJ656064	A
HYLHS032-09|Hylaeus pubescens|COI-5P	A
GBAH7117-10|Hylaeus pubescens|COI-5P|FJ656080	A
HYLHS039-09|Hylaeus pubescens|COI-5P	A
GBAH7110-10|Hylaeus pubescens|COI-5P|FJ656087	A
HYLHS030-09|Hylaeus pubescens|COI-5P	A
GBAH7119-10|Hylaeus pubescens|COI-5P|FJ656078	A
HYLHS027-09|Hylaeus pubescens|COI-5P	A
GBAH7122-10|Hylaeus pubescens|COI-5P|FJ656075	A
GBAH7108-10|Hylaeus pubescens|COI-5P|FJ656089	A
HYLHS042-09|Hylaeus pubescens|COI-5P	A
GBAH7109-10|Hylaeus pubescens|COI-5P|FJ656088	A
HYLHS040-09|Hylaeus pubescens|COI-5P	A
FBAPC938-11|Hylaeus punctatus|COI-5P|KJ838802	A
FBAPB617-09|Hylaeus punctatus|COI-5P|HQ948064	A
MBIOK637-14|Hylaeus punctatus|COI-5P|KR805952	A
FBAPC936-11|Hylaeus punctatus|COI-5P|KJ839293	A
BEECC015-08|Hylaeus punctatus|COI-5P	A
FBAPB619-09|Hylaeus punctatus|COI-5P|KJ839201	A
BEECC014-08|Hylaeus punctatus|COI-5P	A
BEECC013-08|Hylaeus punctatus|COI-5P	A
FBAPB618-09|Hylaeus punctatus|COI-5P|HM401184	A
AUSBS254-13|Leioproctus punctatus|COI-5P	A
AUSBS260-13|Leioproctus punctatus|COI-5P	A
AUSBS259-13|Leioproctus punctatus|COI-5P	A
AUSBS253-13|Leioproctus punctatus|COI-5P	A
AUSBS258-13|Leioproctus punctatus|COI-5P	A
AUSBS261-13|Leioproctus punctatus|COI-5P	A
AUSBS262-13|Leioproctus punctatus|COI-5P	A
AUSBS263-13|Leioproctus punctatus|COI-5P	A
FBAPC935-11|Hylaeus punctulatissimus|COI-5P|KJ839612	A
FBAPB621-09|Hylaeus punctulatissimus|COI-5P|HM401185	A
FBAPD797-11|Hylaeus punctulatissimus|COI-5P|KJ836747	A
FBAPD796-11|Hylaeus punctulatissimus|COI-5P|KJ839035	A
FBAPD794-11|Hylaeus punctulatissimus|COI-5P|KJ837127	A
FBAPC507-11|Hylaeus punctulatissimus|COI-5P|KJ837727	A
ABEE166-17|Hylaeus punctulatissimus|COI-5P	A
ABEE165-17|Hylaeus punctulatissimus|COI-5P	A
BOFTW247-09|Chilicola randolphi|COI-5P	A
BWTWO044-09|Chilicola randolphi|COI-5P|GU708247	A
BWTWO055-09|Chilicola randolphi|COI-5P|GU708248	A
BOFTW235-09|Chilicola randolphi|COI-5P	A
BOWGF2888-13|Chilicola randolphi|COI-5P|KX051520	A
BOWGF2891-13|Chilicola randolphi|COI-5P|KX051532	A
NZHYM456-10|Hylaeus relegatus|COI-5P	A
NZHYM454-10|Hylaeus relegatus|COI-5P	A
FBHAP269-09|Hylaeus rinki|COI-5P|HM401450	A
FBHAP266-09|Hylaeus rinki|COI-5P|GU705973	A
FBAPC934-11|Hylaeus rinki|COI-5P|KJ837486	A
FBHAP267-09|Hylaeus rinki|COI-5P|GU705972	A
FBHAP217-09|Hylaeus rinki|COI-5P|KJ837586	A
GBAH4185-09|Xeromelissa rosie|COI-5P|DQ872707	A
GBAH4165-09|Chilicola rostrata|COI-5P|DQ872727	A
GBAH4178-09|Xeromelissa rozeni|COI-5P|DQ872714	A
LASNA561-08|Xeromelissa rozeni|COI-5P|KX820397	A
GBAH7383-13|Meroglossa rubricata|COI-5P|JN578916	A
BOFTW893-10|Chilicola rubriventris|COI-5P|KX070752	A
AUSBS228-13|Trichocolletes rufibasis|COI-5P	A
AUSBS231-13|Trichocolletes rufibasis|COI-5P	A
AUSBS230-13|Trichocolletes rufibasis|COI-5P	A
AUSBS229-13|Trichocolletes rufibasis|COI-5P	A
GBAH7405-13|Hylaeus ruficeps|COI-5P|JN578893	A
GBAH4160-09|Hylaeus ruficeps|COI-5P|DQ872732	A
HYLHI265-08|Hylaeus rugulosus|COI-5P|FJ411734	A
HYLHI272-08|Hylaeus rugulosus|COI-5P|FJ411733	A
HYLHI211-08|Hylaeus rugulosus|COI-5P|FJ411735	A
GBAH4212-09|Hemicotelles ruizii|COI-5P|DQ872680	A
AUSBS341-13|Euryglossa salaris|COI-5P	A
HYMBC095-10|Colletes salicicola|COI-5P	A
BEECA724-07|Colletes salicicola|COI-5P	A
BEECA721-07|Colletes salicicola|COI-5P	A
BEECB128-07|Colletes salicicola|COI-5P	A
SDBEE136-12|Colletes SanDiego Sp.1|COI-5P	A
SDBEE142-12|Colletes SanDiego Sp.C|COI-5P	A
SDBEE148-12|Hylaeus SanDiego Sp.C|COI-5P	A
SDBEE150-12|Hylaeus SanDiego Sp.3|COI-5P	A
SDBEE145-12|Hylaeus SanDiego Sp.B|COI-5P	A
SDBEE144-12|Hylaeus SanDiego Sp.A|COI-5P	A
SDBEE146-12|Hylaeus SanDiego Sp.1|COI-5P	A
SDBEE147-12|Hylaeus SanDiego Sp.2|COI-5P	A
SDBEE153-12|Hylaeus SanDiego Sp.E|COI-5P	A
SDBEE151-12|Hylaeus SanDiego Sp.4|COI-5P	A
SDBEE152-12|Hylaeus SanDiego Sp.5|COI-5P	A
SDBEE149-12|Hylaeus SanDiego Sp.D|COI-5P	A
BEECC011-08|Hylaeus schwarzii|COI-5P	A
BOWGF079-08|Scrapter Scrapter sp. MK7|COI-5P	A
BOWGF078-08|Scrapter Scrapter sp. MK7|COI-5P	A
GBAH4203-09|Colletes seminitidus|COI-5P|DQ872689	A
GBAH3268-08|Colletes seminitidus|COI-5P|EF218721	A
BEECA863-07|Colletes seminitidus|COI-5P	A
HYLHS051-09|Hylaeus setosifrons|COI-5P	A
GBAH7102-10|Hylaeus setosifrons|COI-5P|FJ656095	A
HYLHI213-08|Hylaeus setosifrons|COI-5P|FJ411738	A
HYLHS047-09|Hylaeus setosifrons|COI-5P	A
HYLHS052-09|Hylaeus setosifrons|COI-5P	A
HYLHI214-08|Hylaeus setosifrons|COI-5P|FJ411737	A
HYLHS049-09|Hylaeus setosifrons|COI-5P	A
GBAH7103-10|Hylaeus setosifrons|COI-5P|FJ656094	A
GBAH7105-10|Hylaeus setosifrons|COI-5P|FJ656092	A
HYLHS045-09|Hylaeus setosifrons|COI-5P	A
HYLHS048-09|Hylaeus setosifrons|COI-5P	A
GBAH7104-10|Hylaeus setosifrons|COI-5P|FJ656093	A
GBAH7100-10|Hylaeus setosifrons|COI-5P|FJ656097	A
HYLHS054-09|Hylaeus setosifrons|COI-5P	A
HYLHS053-09|Hylaeus setosifrons|COI-5P	A
GBAH7101-10|Hylaeus setosifrons|COI-5P|FJ656096	A
HYLHI212-08|Hylaeus setosifrons|COI-5P|FJ411739	A
HYLHS046-09|Hylaeus setosifrons|COI-5P	A
HYLHS050-09|Hylaeus setosifrons|COI-5P	A
HYLHI215-08|Hylaeus setosifrons|COI-5P|FJ411736	A
BOWGF213-09|Mourecotelles sicheli|COI-5P|KX820573	A
GBAH4210-09|Xanthocotelles sicheli|COI-5P|DQ872682	A
FBHAP273-09|Hylaeus signatus|COI-5P|HM401452	A
FBHAP270-09|Hylaeus signatus|COI-5P|HM401451	A
FBHAP271-09|Hylaeus signatus|COI-5P|KJ837965	A
FBAPC933-11|Hylaeus signatus|COI-5P|KJ836815	A
BEEEE160-15|Hylaeus signatus|COI-5P	A
FBAPC645-11|Colletes similis|COI-5P|KJ839777	A
ABEE017-17|Colletes similis|COI-5P	A
GBACU3683-13|Colletes similis|COI-5P|KJ838772	A
ABEE019-17|Colletes similis|COI-5P	A
GBACU1180-12|Colletes similis|COI-5P|KJ836684	A
GBACU3682-13|Colletes similis|COI-5P|KJ837241	A
FBAPC482-11|Colletes similis|COI-5P|KJ836799	A
GBACU1179-12|Colletes similis|COI-5P|KJ838604	A
FBAPC481-11|Colletes similis|COI-5P|KJ838909	A
NOBEE039-09|Colletes similis|COI-5P	A
ABEE018-17|Colletes similis|COI-5P	A
FBHAP209-09|Colletes similis|COI-5P|HM401439	A
FBHAP211-09|Colletes similis|COI-5P|HM401440	A
BEEEE095-15|Colletes similis|COI-5P	A
GMGMA1016-14|Colletes similis|COI-5P	A
GMGMC697-14|Colletes similis|COI-5P	A
GMGMK267-14|Colletes similis|COI-5P	A
BEEEE201-15|Colletes similis|COI-5P	A
IBBP076-10|Colletes similis|COI-5P|JQ909720	A
IBBP075-10|Colletes similis|COI-5P|JQ909719	A
IBBP074-10|Colletes similis|COI-5P|JQ909718	A
IBBP072-10|Colletes similis|COI-5P|JQ909716	A
IBBP073-10|Colletes similis|COI-5P|JQ909717	A
HCBNS006-03|Colletes simulans|COI-5P|FJ582205	A
TTMHY902-11|Colletes simulans|COI-5P|KR890569	A
BEECC701-09|Colletes simulans nevadensis|COI-5P	A
BEECC702-09|Colletes simulans nevadensis|COI-5P	A
BBHEC131-09|Colletes simulans|COI-5P|HM883251	A
BBHEC174-09|Colletes simulans|COI-5P|GU690137	A
UPOLB453-09|Colletes simulans|COI-5P	A
DIAL283-06|Colletes simulans|COI-5P	A
GMOUF238-15|Colletes simulans|COI-5P|MG442577	A
GBAH4206-09|Colletes simulans|COI-5P|DQ872686	A
SMTPO4662-15|Colletes simulans|COI-5P|MG447991	A
HCBNS005-03|Colletes simulans|COI-5P|FJ582204	A
QUEBE009-06|Colletes simulans|COI-5P|MG442833	A
QUEBE023-06|Colletes simulans|COI-5P|MG443708	A
BEECB230-07|Dasyhesma simulata|COI-5P	A
AUSBS336-13|Callohesma sinapipes|COI-5P	A
HYAS1101-12|Callohesma sinapipes|COI-5P	A
HYAS1091-12|Callohesma sinapipes|COI-5P	A
AUSBS335-13|Callohesma sinapipes|COI-5P	A
GBAH7411-13|Callohesma sinapipes|COI-5P|JN578886	A
GBCHA620-13|Hylaeus sinuatus|COI-5P|KJ837078	A
GBACU2108-13|Hylaeus sinuatus|COI-5P|KJ837335	A
FBAPB623-09|Hylaeus sinuatus|COI-5P|HM401186	A
GBACU3578-13|Hylaeus sinuatus|COI-5P|KJ839168	A
GBACU320-12|Hylaeus sinuatus|COI-5P|KJ837344	A
GBACU023-12|Hylaeus sinuatus|COI-5P|KJ837301	A
GBCHA621-13|Hylaeus sinuatus|COI-5P|KJ838865	A
GBACU022-12|Hylaeus sinuatus|COI-5P|KJ837226	A
FBAPD786-11|Hylaeus sinuatus|COI-5P|KJ838509	A
ABEE111-17|Hylaeus sinuatus|COI-5P	A
BEECB459-07|Colletes slevini|COI-5P	A
BEECC688-09|Colletes slevini|COI-5P	A
BEECC498-08|Colletes slevini|COI-5P	A
BEECC686-09|Colletes slevini|COI-5P	A
BEECC685-09|Colletes slevini|COI-5P	A
BEECC687-09|Colletes slevini|COI-5P	A
BBHYA973-12|Colletes slevini|COI-5P	A
SDBEE143-12|Colletes slevini|COI-5P	A
SDBEE141-12|Colletes slevini|COI-5P	A
BBHYA976-12|Colletes slevini|COI-5P	A
SDBEE138-12|Colletes slevini|COI-5P	A
HYLHI216-08|Hylaeus solaris|COI-5P|FJ411742	A
HYLHI218-08|Hylaeus solaris|COI-5P|FJ411740	A
HYLHI217-08|Hylaeus solaris|COI-5P|FJ411741	A
DIAL282-06|Colletes solidaginis|COI-5P	A
DIAL236-06|Colletes solidaginis|COI-5P	A
AUSBS329-13|Callohesma sp. RLHG2|COI-5P	A
AUSBS350-13|Callohesma sp. RLHG8|COI-5P	A
AUSBS328-13|Callohesma sp. RLHG2|COI-5P	A
AUSBS214-13|Callohesma sp. nov RLCD3|COI-5P	A
AUSBS216-13|Callohesma sp. nov RLCD3|COI-5P	A
AUSBS213-13|Callohesma sp. nov RLCD3|COI-5P	A
AUSBS215-13|Callohesma sp. nov RLCD3|COI-5P	A
GBMIN29281-13|Callohesma sp. 1 PK-2012|COI-5P|JN603422	A
GBMIN29318-13|Callohesma sp. 3 PK-2012|COI-5P|JN603421	A
GBMIN29317-13|Callohesma sp. 2 PK-2012|COI-5P|JN603423	A
GBAH4174-09|Chilicola sp. 2 EABA-2006|COI-5P|DQ872718	A
GBAH4175-09|Chilicola sp. 1 EABA-2006|COI-5P|DQ872717	A
GBAH4171-09|Chilicola sp. 5 EABA-2006|COI-5P|DQ872721	A
GBAH4172-09|Chilicola sp. 4 EABA-2006|COI-5P|DQ872720	A
GBAH4167-09|Chilicola sp. 6 EABA-2006|COI-5P|DQ872725	A
BOFTW156-08|Colletes sp. aff. petropolitanus|COI-5P	A
GBAH1840-06|Colletes sp. NHM AD102|COI-5P|DQ085547	A
GBMIN74628-17|Colletes sp. JAW-2015|COI-5P|KT123217	A
GBMIN31542-13|Colletes sp. YZ-2010|COI-5P|HQ258922	A
MSAPB1288-12|Dasyhesma sp.|COI-5P	A
AUSBS201-13|Dasyhesma sp. RLCD5|COI-5P	A
AUSBS200-13|Dasyhesma sp. RLCD5|COI-5P	A
AUSBS132-12|Euhesma sp. nov RLWB2|COI-5P	A
AUSBS133-12|Euhesma sp. nov RLWB2|COI-5P	A
AUSBS134-12|Euhesma sp. nov RLWB2|COI-5P	A
AUSBS131-12|Euhesma sp. nov RLWB2|COI-5P	A
AUSBS137-12|Euhesma sp. nov RLWB1|COI-5P	A
AUSBS135-12|Euhesma sp. nov RLWB3|COI-5P	A
AUSBS136-12|Euhesma sp. nov RLWB3|COI-5P	A
AUSBS065-12|Euhesma sp. nov RLCR1|COI-5P	A
AUSBS082-12|Euhesma sp. nov RLCR1-walkeriana-group|COI-5P	A
AUSBS009-12|Euhesma sp. nov RLCR1-walkeriana-group|COI-5P	A
AUSBS083-12|Euhesma sp. nov RLCR1-walkeriana-group|COI-5P	A
AUSBS084-12|Euhesma sp. nov RLCR1-walkeriana-group|COI-5P	A
AUSBS081-12|Euhesma sp. nov RLCR1-walkeriana-group|COI-5P	A
GBAH4197-09|Euhesma sp. EABA-2006|COI-5P|DQ872695	A
GBMIN29280-13|Euhesma sp. 1 PK-2012|COI-5P|JN603424	A
GBMIN29316-13|Euhesma sp. 2 PK-2012|COI-5P|JN603425	A
AUSBS212-13|Euryglossa sp. RLCD5|COI-5P	A
GBAH4213-09|Euryglossidia sp. 4 EABA-2006|COI-5P|DQ872679	A
GBMIN29278-13|Euryglossina sp. 3 PK-2012|COI-5P|JN603428	A
GBMIN29315-13|Euryglossina sp. 2 PK-2012|COI-5P|JN603427	A
GBMIN29314-13|Euryglossula sp. 1 PK-2012|COI-5P|JN603429	A
GBMIN29313-13|Euryglossula sp. 3 PK-2012|COI-5P|JN603431	A
GBMIN29277-13|Euryglossula sp. 2 PK-2012|COI-5P|JN603430	A
AUSBS310-13|Goniocolletes sp. nov RLHG1|COI-5P	A
AUSBS312-13|Goniocolletes sp. nov RLHG1|COI-5P	A
AUSBS311-13|Goniocolletes sp. nov RLHG1|COI-5P	A
AUSBS308-13|Goniocolletes sp. nov RLHG1|COI-5P	A
AUSBS313-13|Goniocolletes sp.|COI-5P	A
AUSBS160-12|Hylaeus sp. RLWB9 wholeabdorange|COI-5P	A
AUSBS159-12|Hylaeus sp. RLWB8|COI-5P	A
AUSBS158-12|Hylaeus sp. RLWB7 nofacemarkslegsred|COI-5P	A
AUSBS157-12|Hylaeus sp. RLWB6 nofacemarks|COI-5P	A
AUSBS298-13|Hylaeus sp. RLWO1|COI-5P	A
BEECC321-08|Hylaeus sp. aff. colaoradensis4|COI-5P	A
BEECB485-07|Hylaeus sp. 12375|COI-5P	A
JSHYP153-11|Hylaeus sp. B|COI-5P|KR790676	A
BEECB821-07|Hylaeus sp. 12383|COI-5P	A
TTHYW459-08|Hylaeus sp. 22372|COI-5P|KR897033	A
TTHYW462-08|Hylaeus sp. 22372|COI-5P|KR887129	A
ABBOL013-15|Hylaeus sp.|COI-5P	A
GBMIN12190-13|Hylaeus sp. 1 ZQN-2013|COI-5P|KC469655	A
GBMIN12207-13|Hylaeus sp. 2 ZQN-2013|COI-5P|KC469668	A
GBMIN74638-17|Hylaeus sp. 4 ZQN-2016|COI-5P|KU315139	A
AUSBS156-12|Hylaeus sp. RLWB5 yellow head|COI-5P	A
AUSBS151-12|Hylaeus sp. RLWB1 sternite tub|COI-5P	A
AUSBS152-12|Hylaeus sp. RLWB1 sternite tub|COI-5P	A
AUSBS150-12|Hylaeus sp. RLWB1 sternite tub|COI-5P	A
AUSBS149-12|Hylaeus sp. RLWB1|COI-5P	A
AUSBS155-12|Hylaeus sp. RLWB4 red t1|COI-5P	A
AUSBS153-12|Hylaeus sp. RLWB2 sternite tub|COI-5P	A
AUSBS219-13|Hylaeus sp. RLCD5-Pseudhylaeus|COI-5P	A
AUSBS222-13|Hylaeus sp. RLCD5-Pseudhylaeus|COI-5P	A
AUSBS220-13|Hylaeus sp. RLCD5-Pseudhylaeus|COI-5P	A
AUSBS224-13|Hylaeus sp. RLCD2-Planihylaeus|COI-5P	A
AUSBS223-13|Hylaeus sp. RLCD1-Pseudhylaeus|COI-5P	A
AUSBS218-13|Hylaeus sp. RLCD1-Pseudhylaeus|COI-5P	A
GBMIN74637-17|Hylaeus sp. 0604D210|COI-5P|KY072312	A
GBMIN29276-13|Hyphesma sp. 1 PK-2012|COI-5P|JN603432	A
GBMIN29312-13|Hyphesma sp. 2 PK-2012|COI-5P|JN603433	A
AUSBS127-12|Leioproctus sp. RLWB11|COI-5P	A
AUSBS126-12|Leioproctus sp. RLWB11|COI-5P	A
AUSBS120-12|Leioproctus sp. RLWB7|COI-5P	A
AUSBS125-12|Leioproctus sp. RLWB10|COI-5P	A
AUSBS124-12|Leioproctus sp. RLWB10|COI-5P	A
AUSBS129-12|Leioproctus sp. RLWB12|COI-5P	A
AUSBS121-12|Leioproctus sp. RLWB8|COI-5P	A
AUSBS123-12|Leioproctus sp. RLWB9|COI-5P	A
AUSBS122-12|Leioproctus sp. RLWB9|COI-5P	A
AUSBS128-12|Leioproctus sp. RLWB12|COI-5P	A
AUSBS264-13|Leioproctus sp. RLCD3|COI-5P	A
AUSBS267-13|Leioproctus sp. RLCD3|COI-5P	A
AUSBS266-13|Leioproctus sp. RLCD3|COI-5P	A
AUSBS265-13|Leioproctus sp. RLCD3|COI-5P	A
AUSBS271-13|Leioproctus sp. RLCD3|COI-5P	A
AUSBS274-13|Leioproctus sp. RLCD3|COI-5P	A
AUSBS273-13|Leioproctus sp. RLCD3|COI-5P	A
AUSBS278-13|Leioproctus sp. RLCD3|COI-5P	A
AUSBS272-13|Leioproctus sp. RLCD3|COI-5P	A
AUSBS269-13|Leioproctus sp. RLCD15|COI-5P	A
AUSBS268-13|Leioproctus sp. RLCD14|COI-5P	A
AUSBS041-12|Leioproctus sp. RLCR1|COI-5P	A
AUSBS042-12|Leioproctus sp. RLCR1|COI-5P	A
AUSBS044-12|Leioproctus sp. RLCR1|COI-5P	A
AUSBS043-12|Leioproctus sp. RLCR1|COI-5P	A
AUSBS281-13|Leioproctus sp. RLCD1|COI-5P	A
AUSBS280-13|Leioproctus sp. RLCD1|COI-5P	A
AUSBS252-13|Leioproctus sp. RLCD8|COI-5P	A
AUSBS283-13|Leioproctus sp. RLCD2|COI-5P	A
AUSBS244-13|Leioproctus sp. RLCD1|COI-5P	A
AUSBS021-12|Leioproctus sp. RLCR3|COI-5P	A
AUSBS245-13|Leioproctus sp. RLCD12|COI-5P	A
AUSBS246-13|Leioproctus sp. RLCD12|COI-5P	A
AUSBS284-13|Leioproctus sp. RLCD7|COI-5P	A
AUSBS285-13|Leioproctus sp. RLCD7|COI-5P	A
AUSBS321-13|Leioproctus sp. nov RLHG5-Excolletes|COI-5P	A
AUSBS322-13|Leioproctus sp. nov RLHG5-Excolletes|COI-5P	A
AUSBS319-13|Leioproctus sp. nov RLHG5-Excolletes|COI-5P	A
AUSBS320-13|Leioproctus sp. nov RLHG5-Excolletes|COI-5P	A
AUSBS119-12|Leioproctus sp. RLWB6|COI-5P	A
AUSBS282-13|Leioproctus sp. RLCD5|COI-5P	A
GBMIN29275-13|Pachyprosopis sp. PK-2012|COI-5P|JN603434	A
LASNA788-08|Scrapter sp. aff. bicolor|COI-5P	A
LASNA694-08|Scrapter sp. aff. bicolor|COI-5P	A
BOWGF071-08|Scrapter sp. MK1|COI-5P	A
BOWGF070-08|Scrapter sp. MK1|COI-5P	A
BOWGF083-08|Scrapter sp. MK5|COI-5P	A
BOWGF082-08|Scrapter sp. MK5|COI-5P	A
BOWGF080-08|Scrapter sp. MK5|COI-5P	A
BOWGF076-08|Scrapter sp. MK5|COI-5P	A
BOWGF077-08|Scrapter sp. MK5|COI-5P	A
BOWGF072-08|Scrapter sp. MK1|COI-5P	A
LASNA697-08|Scrapter sp. aff. niger|COI-5P	A
LASNA791-08|Scrapter sp. aff. niger|COI-5P	A
BOWGF061-08|Scrapter sp. MKg|COI-5P	A
BOWGF060-08|Scrapter sp. MKg|COI-5P	A
BOWGF058-08|Scrapter sp. aff. nitidus|COI-5P	A
GBAH4215-09|Trichocolletes sp. BND-2004|COI-5P|DQ872677	A
AUSBS040-12|Trichocolletes sp. RLCR1|COI-5P	A
GBAH4182-09|Xeromelissa sp. 2 EABA-2006|COI-5P|DQ872710	A
GBAH4187-09|Xeromelissa sp. 1 EABA-2006|COI-5P|DQ872705	A
GBAH4179-09|Xeromelissa sp. 3 EABA-2006|COI-5P|DQ872713	A
BEECB1010-07|Hylaeus sp1-3257|COI-5P	A
LASNA556-08|Xeromelissa sp5|COI-5P|KX821045	A
LASNA555-08|Xeromelissa sp5|COI-5P|KX820792	A
HYLHI222-08|Hylaeus specularis|COI-5P|FJ411753	A
HYLHI224-08|Hylaeus specularis|COI-5P|FJ411751	A
HYLHI226-08|Hylaeus specularis|COI-5P|FJ411749	A
HYLHI225-08|Hylaeus specularis|COI-5P|FJ411750	A
HYLHI223-08|Hylaeus specularis|COI-5P|FJ411752	A
HYLHI274-08|Hylaeus specularis|COI-5P|FJ411744	A
HYLHI275-08|Hylaeus specularis|COI-5P|FJ411743	A
HYLHI273-08|Hylaeus specularis|COI-5P|FJ411745	A
HYLHI268-08|Hylaeus specularis|COI-5P|FJ411746	A
HYLHI267-08|Hylaeus specularis|COI-5P|FJ411747	A
HYLHI266-08|Hylaeus specularis|COI-5P|FJ411748	A
HYLHI221-08|Hylaeus specularis|COI-5P|FJ411754	A
HYLHI219-08|Hylaeus specularis|COI-5P|FJ411756	A
HYLHI220-08|Hylaeus specularis|COI-5P|FJ411755	A
SDBEE135-12|Colletes sphaeralceae|COI-5P	A
BEECC673-09|Colletes sphaeralceae|COI-5P	A
BEECC674-09|Colletes sphaeralceae|COI-5P	A
TTHYW082-08|Colletes sphaeralceae|COI-5P|MG481227	A
HYLHI231-08|Hylaeus sphecodoides|COI-5P|FJ411757	A
HYLHI228-08|Hylaeus sphecodoides|COI-5P|FJ411760	A
HYLHI229-08|Hylaeus sphecodoides|COI-5P|FJ411759	A
HYLHI230-08|Hylaeus sphecodoides|COI-5P|FJ411758	A
HYLHI227-08|Hylaeus sphecodoides|COI-5P|FJ411761	A
HYLNS006-13|Hylaeus strenuus|COI-5P|KF583517	A
GBAH7382-13|Meroglossa striaticeps|COI-5P|JN578917	A
GBMIN29310-13|Scrapter striatus|COI-5P|JN603437	A
GBAH4162-09|Chilicola styliventris|COI-5P|DQ872730	A
ABEE130-17|Hylaeus styriacus|COI-5P	A
FBAPC941-11|Hylaeus styriacus|COI-5P|KJ837075	A
FBAPC940-11|Hylaeus styriacus|COI-5P|KJ839012	A
FBAPD782-11|Hylaeus styriacus|COI-5P|KJ837800	A
BEECB326-07|Colletes submarginatus|COI-5P	A
GBAH1815-06|Colletes succinctus|COI-5P|DQ085522	A
GBAH1814-06|Colletes succinctus|COI-5P|DQ085521	A
IBBP079-10|Colletes succinctus|COI-5P|JQ909722	A
IBBP080-10|Colletes succinctus|COI-5P|JQ909723	A
GBAH1813-06|Colletes succinctus|COI-5P|DQ085520	A
GBAH1818-06|Colletes succinctus|COI-5P|DQ085525	A
GBAH1812-06|Colletes succinctus|COI-5P|DQ085519	A
GBAH1816-06|Colletes succinctus|COI-5P|DQ085523	A
IBBP078-10|Colletes succinctus|COI-5P|JQ909721	A
IBBP077-10|Colletes succinctus|COI-5P|JQ909724	A
GBAH1817-06|Colletes succinctus|COI-5P|DQ085524	A
FBAPB543-09|Colletes succinctus|COI-5P|KJ837472	A
BEEEE235-15|Colletes succinctus|COI-5P	A
BEEEE139-15|Colletes succinctus|COI-5P	A
FBAPB542-09|Colletes succinctus|COI-5P|KJ838166	A
ABEE167-17|Colletes succinctus|COI-5P	A
AUSBS204-13|Euhesma sulcata|COI-5P	A
AUSBS207-13|Euhesma sulcata|COI-5P	A
AUSBS205-13|Euhesma sulcata|COI-5P	A
AUSBS209-13|Euhesma sulcata|COI-5P	A
AUSBS208-13|Euhesma sulcata|COI-5P	A
AUSBS206-13|Euhesma sulcata|COI-5P	A
HYLHI232-08|Hylaeus takumiae|COI-5P|FJ411762	A
DIAL042-06|Colletes thoracicus|COI-5P	A
GBAH4205-09|Colletes thoracicus|COI-5P|DQ872687	A
TTHYW757-08|Colletes thoracicus|COI-5P|KR882490	A
TTHYW759-08|Colletes thoracicus|COI-5P|KR890526	A
BUSA097-05|Colletes thoracicus|COI-5P	A
BEECC266-08|Colletes thoracicus|COI-5P	A
BBHYA853-12|Colletes thysanellae|COI-5P	A
DIAL737-06|Colletes thysanellae|COI-5P	A
GBAH7381-13|Meroglossa torrida|COI-5P|JN578918	A
ABBOL009-15|Hylaeus transversalis|COI-5P	A
BOWGF1091-10|Chilicola travesia|COI-5P|HM404537	A
BOWGF3018-14|Chilicola travesia|COI-5P|KX051526	A
BOWGF1087-10|Chilicola travesia|COI-5P|HM404534	A
BOWGF3008-14|Chilicola travesia|COI-5P|KX051511	A
BOWGF3011-14|Chilicola travesia|COI-5P|KX051510	A
BOWGF3017-14|Chilicola travesia|COI-5P|KX051548	A
BOWGF3019-14|Chilicola travesia|COI-5P|KX051554	A
BOWGF3032-14|Chilicola travesia|COI-5P|KX051546	A
BOWGF3020-14|Chilicola travesia|COI-5P|KX051545	A
BOWGF1094-10|Chilicola travesia|COI-5P|HM404540	A
BOWGF3009-14|Chilicola travesia|COI-5P|KX051524	A
GBACU3573-13|Hylaeus tyrolensis|COI-5P|KJ836565	A
HYLNS002-11|Hylaeus ulaula|COI-5P|JN679600	A
HYLHI235-08|Hylaeus unicus|COI-5P|FJ411773	A
HYLHI237-08|Hylaeus unicus|COI-5P|FJ411771	A
HYLHI233-08|Hylaeus unicus|COI-5P|FJ411775	A
HYLHI234-08|Hylaeus unicus|COI-5P|FJ411774	A
HYLHI236-08|Hylaeus unicus|COI-5P|FJ411772	A
HYLHI243-08|Hylaeus unicus|COI-5P|FJ411765	A
HYLHI241-08|Hylaeus unicus|COI-5P|FJ411767	A
HYLHI244-08|Hylaeus unicus|COI-5P|FJ411764	A
HYLHI242-08|Hylaeus unicus|COI-5P|FJ411766	A
HYLHI245-08|Hylaeus unicus|COI-5P|FJ411763	A
HYLHI238-08|Hylaeus unicus|COI-5P|FJ411770	A
HYLHI240-08|Hylaeus unicus|COI-5P|FJ411768	A
HYLHI239-08|Hylaeus unicus|COI-5P|FJ411769	A
BEECC268-08|Colletes validus|COI-5P	A
ASGCB219-13|Colletes validus|COI-5P	A
FBAPC492-11|Hylaeus variegatus|COI-5P|KJ837791	A
FBAPC494-11|Hylaeus variegatus|COI-5P|KJ836828	A
FBAPD447-11|Hylaeus variegatus|COI-5P|KJ837617	A
FBAPD772-11|Hylaeus variegatus|COI-5P|KJ838038	A
FBAPD771-11|Hylaeus variegatus|COI-5P|KJ836649	A
FBAPD451-11|Hylaeus variegatus|COI-5P|KJ838142	A
FBAPD449-11|Hylaeus variegatus|COI-5P|KJ838386	A
FBAPB624-09|Hylaeus variegatus|COI-5P|HM401187	A
FBAPC931-11|Hylaeus variegatus|COI-5P|KJ839539	A
GBACU3508-13|Hylaeus variegatus|COI-5P|KJ837643	A
FBAPC493-11|Hylaeus variegatus|COI-5P|KJ838834	A
FBAPD450-11|Hylaeus variegatus|COI-5P|KJ839619	A
GBCHA605-13|Hylaeus variegatus|COI-5P|KJ838339	A
GBCHA603-13|Hylaeus variegatus|COI-5P|KJ839326	A
ABEE223-17|Hylaeus variegatus|COI-5P	A
GBCHA604-13|Hylaeus variegatus|COI-5P|KJ838638	A
FBAPD770-11|Hylaeus variegatus|COI-5P|KJ839073	A
FBAPC932-11|Hylaeus variegatus|COI-5P|KJ838606	A
GBCHA607-13|Hylaeus variegatus|COI-5P|KJ836492	A
GBAH4176-09|Chilicola vernalis|COI-5P|DQ872716	A
BWTWO1375-10|Chilicola vernalis|COI-5P|HQ938065	A
HDBNS008-03|Hylaeus verticalis|COI-5P|FJ582262	A
BBHYA2777-12|Hylaeus verticalis|COI-5P	A
BEECA234-06|Hylaeus verticalis|COI-5P	A
HDBNS007-03|Hylaeus verticalis|COI-5P|FJ582260	A
BEECB642-07|Hylaeus verticalis|COI-5P|FJ582261	A
BEECA853-07|Caupolicana vestita|COI-5P|KX820982	A
BOWGF088-08|Scrapter viciniger|COI-5P	A
BOWGF085-08|Scrapter viciniger|COI-5P	A
BOWGF084-08|Scrapter viciniger|COI-5P	A
BOWGF089-08|Scrapter viciniger|COI-5P	A
GBAH4166-09|Chilicola vicugna|COI-5P|DQ872726	A
BOWGF3010-14|Chilicola vicugna|COI-5P|KX051499	A
BOWGF3001-14|Chilicola vicugna|COI-5P|KX051553	A
BOTWC354-10|Chilicola vicugna|COI-5P|HQ937546	A
BOTWC293-10|Chilicola vicugna|COI-5P|HQ937494	A
BOWGF3016-14|Chilicola vicugna|COI-5P|KX051541	A
BOWGF3000-14|Chilicola vicugna|COI-5P|KX051505	A
BOTWC353-10|Chilicola vicugna|COI-5P|HQ937545	A
BOWGF3015-14|Chilicola vicugna|COI-5P|KX051501	A
BOTWC352-10|Chilicola vicugna|COI-5P|HQ937544	A
BOWGF3006-14|Chilicola vina|COI-5P|KX051512	A
BOWGF3005-14|Chilicola vina|COI-5P|KX051513	A
BOTWC322-10|Chilicola vina|COI-5P|HQ937515	A
BOTWA1411-11|Chilicola vina|COI-5P|KX051508	A
BOTWC026-10|Chilicola vina|COI-5P|HQ937286	A
BWTWO009-09|Chilicola vina|COI-5P|GU708260	A
BOWGF3322-14|Chilicola vina|COI-5P|KX051523	A
GBAH7395-13|Hylaeus vittatifrons|COI-5P|JN578904	A
[truncated: 48 more rows]

## Sheet: Halictidae BOLD Position 153
BOLD Sample	COI Position 153
DLII1492-08|Lasioglossum abanci|COI-5P|HQ945439-SUPPRESSED	A
DIAL662-06|Lasioglossum abanci|COI-5P	A
BOWGF1698-10|Lasioglossum abanci|COI-5P	A
GBMIN20017-13|Patellapis abessinica|COI-5P|JQ266487	A
DLII883-07|Lasioglossum absimile|COI-5P	A
BWTWO927-10|Lasioglossum absimile|COI-5P|HM405350-SUPPRESSED	A
BWTWO921-10|Lasioglossum absimile|COI-5P|HM405347-SUPPRESSED	A
BWTWO924-10|Lasioglossum absimile|COI-5P|HM405348-SUPPRESSED	A
DLII884-07|Lasioglossum absimile|COI-5P	A
DLII1157-08|Lasioglossum abundipunctum|COI-5P	A
DLII972-07|Lasioglossum abundipunctum|COI-5P	A
DLII970-07|Lasioglossum abundipunctum|COI-5P|JF903493	A
DLII934-07|Lasioglossum abundipunctum|COI-5P	A
DLII1008-07|Lasioglossum abundipunctum|COI-5P	A
BOFTW072-08|Augochlorella acarinata|COI-5P	A
DLII846-07|Lasioglossum acarophilum|COI-5P	A
BOFWM045-08|Lasioglossum acarophilum|COI-5P	A
BOFWM042-08|Lasioglossum acarophilum|COI-5P	A
LASNA038-08|Lasioglossum achilleae|COI-5P	A
ASBEE082-08|Lasioglossum actinosum|COI-5P	A
DLII1213-08|Lasioglossum acuminatum|COI-5P	A
DLII1212-08|Lasioglossum acuminatum|COI-5P	A
DLII459-07|Lasioglossum acuminatum|COI-5P	A
BEECC044-08|Lasioglossum acuminatum|COI-5P|FJ582265	A
HDBNS149-03|Lasioglossum acuminatum|COI-5P|FJ582263	A
HDBNS150-03|Lasioglossum acuminatum|COI-5P|FJ582264	A
DLII1655-09|Lasioglossum admirandum|COI-5P	A
DLII1663-09|Lasioglossum admirandum|COI-5P	A
DLII1658-09|Lasioglossum admirandum|COI-5P	A
DLII1685-09|Lasioglossum admirandum|COI-5P	A
DLII1645-09|Lasioglossum admirandum|COI-5P	A
DLIII057-09|Lasioglossum admirandum|COI-5P	A
DLII1683-09|Lasioglossum admirandum|COI-5P	A
DLII1686-09|Lasioglossum admirandum|COI-5P	A
DLII1642-09|Lasioglossum admirandum|COI-5P	A
DLII1657-09|Lasioglossum admirandum|COI-5P	A
DLII1647-09|Lasioglossum admirandum|COI-5P	A
DLIII015-09|Lasioglossum admirandum|COI-5P	A
DLIII013-09|Lasioglossum admirandum|COI-5P	A
DLII1651-09|Lasioglossum admirandum|COI-5P	A
DLII1653-09|Lasioglossum admirandum|COI-5P	A
BEECB216-07|Lasioglossum admirandum|COI-5P	A
DIAL1124-07|Lasioglossum admirandum|COI-5P|JF903494	A
DLII1660-09|Lasioglossum admirandum|COI-5P	A
DLII026-06|Lasioglossum admirandum|COI-5P	A
DIAL427-06|Lasioglossum admirandum|COI-5P	A
BEECB214-07|Lasioglossum admirandum|COI-5P	A
LASNA049-08|Lasioglossum admirandum|COI-5P	A
BOWGF422-09|Lasioglossum admirandum|COI-5P	A
DLII1596-09|Lasioglossum admirandum|COI-5P	A
DLII1603-09|Lasioglossum admirandum|COI-5P	A
DLII1613-09|Lasioglossum admirandum|COI-5P	A
DLII1582-09|Lasioglossum admirandum|COI-5P	A
DLII1579-09|Lasioglossum admirandum|COI-5P	A
DLII1583-09|Lasioglossum admirandum|COI-5P	A
DLII1609-09|Lasioglossum admirandum|COI-5P	A
DLII1584-09|Lasioglossum admirandum|COI-5P	A
DLII1610-09|Lasioglossum admirandum|COI-5P	A
DLIII003-09|Lasioglossum admirandum|COI-5P	A
DIAL1331-08|Lasioglossum aeneum|COI-5P	A
DIAL1327-08|Lasioglossum aeneum|COI-5P	A
FBAPB345-09|Lasioglossum aeratum|COI-5P|KJ839269	A
GBACU2325-13|Lasioglossum aeratum|COI-5P|KJ838265	A
GBCHA010-13|Lasioglossum aeratum|COI-5P|KJ837299	A
GBACU2324-13|Lasioglossum aeratum|COI-5P|KJ836797	A
GBACU079-12|Lasioglossum aeratum|COI-5P|KJ836892	A
GBCHA011-13|Lasioglossum aeratum|COI-5P|KJ838251	A
FBAPB344-09|Lasioglossum aeratum|COI-5P|HQ948050	A
FBAPB343-09|Lasioglossum aeratum|COI-5P|HQ948049	A
GBMIN20056-13|Lasioglossum aethiopicum|COI-5P|JQ266407	A
BOFTW070-08|Augochlora aff. phoemone4|COI-5P	A
DLII1074-07|Lasioglossum aff. Hudsoniellum|COI-5P	A
DLII546-07|Lasioglossum aff. comulum|COI-5P	A
DIAL1165-07|Lasioglossum aff. comulum|COI-5P	A
DLII978-07|Lasioglossum aff. comulum|COI-5P	A
DIAL1164-07|Lasioglossum aff. comulum|COI-5P	A
DLII976-07|Lasioglossum aff. comulum|COI-5P	A
DLII791-07|Lasioglossum aff. comulum|COI-5P|JF903502	A
DIAL1167-07|Lasioglossum aff. comulum|COI-5P	A
DLII1267-08|Lasioglossum aff. comulum|COI-5P	A
LASNA497-08|Lasioglossum affine|COI-5P	A
BOFTH411-09|Maynenomia affpackeri|COI-5P	A
GMESC074-14|Halictus affpici|COI-5P	A
GMESD012-14|Halictus affpici|COI-5P	A
GMEGL121-14|Halictus affpici|COI-5P	A
GMEGB140-14|Halictus affpici|COI-5P	A
BOFTW016-08|Augochloropsis affsparsalis|COI-5P	A
LASNA637-08|Halictus africanus|COI-5P	A
BOWGF1615-10|Lasioglossum alachuense|COI-5P	A
BOWGF1632-10|Lasioglossum alachuense|COI-5P	A
BOWGF1630-10|Lasioglossum alachuense|COI-5P|HM905839-SUPPRESSED	A
BOWGF1638-10|Lasioglossum alachuense|COI-5P	A
GBAH11263-15|Lasioglossum albescens|COI-5P|KR076768	A
GBAH11264-15|Lasioglossum albescens|COI-5P|KR076769	A
GBAH11260-15|Lasioglossum albescens|COI-5P|KR076765	A
GBAH11268-15|Lasioglossum albescens|COI-5P|KR076773	A
GBAH11262-15|Lasioglossum albescens|COI-5P|KR076767	A
GBAH11261-15|Lasioglossum albescens|COI-5P|KR076766	A
GBAH11269-15|Lasioglossum albescens|COI-5P|KR076774	A
GBAH11271-15|Lasioglossum albescens|COI-5P|KR076776	A
GBAH11270-15|Lasioglossum albescens|COI-5P|KR076775	A
GBAH11272-15|Lasioglossum albescens|COI-5P|KR076777	A
PMNHA012-14|Lasioglossum albescens|COI-5P|KY839719	A
PMNHB009-14|Lasioglossum albescens|COI-5P|KY842676	A
PMNHA013-14|Lasioglossum albescens|COI-5P|KY843521	A
PMNHN418-15|Lasioglossum albescens|COI-5P|KY846763	A
MAMTL028-12|Lasioglossum albescens|COI-5P|KY833208	A
PMNHJ159-15|Lasioglossum albescens|COI-5P|KY842288	A
MAMTJ063-12|Lasioglossum albescens|COI-5P|KY845697	A
PMNHI161-15|Lasioglossum albescens|COI-5P|KY831984	A
PMNHI163-15|Lasioglossum albescens|COI-5P|KY837289	A
PMNHD188-14|Lasioglossum albescens|COI-5P|KY840818	A
GBAH11267-15|Lasioglossum albescens|COI-5P|KR076772	A
GBAH11265-15|Lasioglossum albescens|COI-5P|KR076770	A
GBAH11266-15|Lasioglossum albescens|COI-5P|KR076771	A
GBACU1613-12|Sphecodes albilabris|COI-5P|KJ837193	A
FBAPC096-10|Sphecodes albilabris|COI-5P|KJ837915	A
FBAPC475-10|Sphecodes albilabris|COI-5P|KJ839072	A
FBHAP594-09|Sphecodes albilabris|COI-5P|GU705920	A
GBACU1614-12|Sphecodes albilabris|COI-5P|KJ838923	A
GBACU1612-12|Sphecodes albilabris|COI-5P|KJ839477	A
FBAPC585-11|Sphecodes albilabris|COI-5P|KJ839339	A
GBACU2315-13|Sphecodes albilabris|COI-5P|KJ839121	A
FBAPC586-11|Sphecodes albilabris|COI-5P|KJ839755	A
FBHAP593-09|Sphecodes albilabris|COI-5P|GU706064	A
GBACU1610-12|Sphecodes albilabris|COI-5P|KJ839542	A
GBCHA1050-13|Sphecodes albilabris|COI-5P|KJ836644	A
FBAPD097-11|Sphecodes albilabris|COI-5P|KJ838894	A
GMGMB080-14|Sphecodes albilabris|COI-5P	A
GMGMN291-14|Sphecodes albilabris|COI-5P	A
GMGMN1392-14|Sphecodes albilabris|COI-5P	A
GMGMD278-14|Sphecodes albilabris|COI-5P	A
GMGMD1210-14|Sphecodes albilabris|COI-5P	A
GMGMD1208-14|Sphecodes albilabris|COI-5P	A
GBMIN11798-13|Sphecodes albilabris|COI-5P|JX256656	A
GBMIN11839-13|Sphecodes albilabris|COI-5P|JX256655	A
GBMIN11838-13|Sphecodes albilabris|COI-5P|JX256657	A
BEECB217-07|Lasioglossum albipenne|COI-5P	A
DLII761-07|Lasioglossum albipenne|COI-5P	A
DIAL1341-08|Lasioglossum albipenne|COI-5P	A
DLII1012-07|Lasioglossum albipenne|COI-5P	A
DIAL1243-08|Lasioglossum albipenne|COI-5P	A
DIAL100-06|Lasioglossum albipenne|COI-5P	A
DLII1633-09|Lasioglossum albipenne|COI-5P	A
BEECB220-07|Lasioglossum albipenne|COI-5P	A
DIAL099-06|Lasioglossum albipenne|COI-5P	A
DLII666-07|Lasioglossum albipenne|COI-5P|JF903495	A
DLII640-07|Lasioglossum albipenne|COI-5P	A
BWTWO1091-10|Lasioglossum albipenne|COI-5P|HQ937904-SUPPRESSED	A
DIAL101-06|Lasioglossum albipenne|COI-5P	A
DIAL419-06|Lasioglossum albipenne|COI-5P	A
IBBP125-10|Lasioglossum albipes|COI-5P|JQ909769	A
IBBP110-10|Lasioglossum albipes|COI-5P|JQ909755	A
IBBP100-10|Lasioglossum albipes|COI-5P|JQ909745	A
IBBP099-10|Lasioglossum albipes|COI-5P|JQ909744	A
IBBP101-10|Lasioglossum albipes|COI-5P|JQ909746	A
IBBP118-10|Lasioglossum albipes|COI-5P|JQ909763	A
IBBP113-10|Lasioglossum albipes|COI-5P|JQ909758	A
IBBP114-10|Lasioglossum albipes|COI-5P|JQ909759	A
IBBP108-10|Lasioglossum albipes|COI-5P|JQ909753	A
IBBP098-10|Lasioglossum albipes|COI-5P|JQ909743	A
IBBP126-10|Lasioglossum albipes|COI-5P|JQ909770	A
IBBP117-10|Lasioglossum albipes|COI-5P|JQ909762	A
IBBP119-10|Lasioglossum albipes|COI-5P|JQ909764	A
IBBP109-10|Lasioglossum albipes|COI-5P|JQ909754	A
IBBP123-10|Lasioglossum albipes|COI-5P|JQ909767	A
NOBEE081-09|Lasioglossum albipes|COI-5P	A
NOBEE082-09|Lasioglossum albipes|COI-5P	A
GBCHA027-13|Lasioglossum albipes|COI-5P|KJ838152	A
GBCHA028-13|Lasioglossum albipes|COI-5P|KJ839029	A
GBCHA024-13|Lasioglossum albipes|COI-5P|KJ838990	A
GBCHA031-13|Lasioglossum albipes|COI-5P|KJ837103	A
CJP025-14|Lasioglossum albipes|COI-5P	A
FBHAP668-09|Lasioglossum albipes|COI-5P|GU706026	A
FBHAP669-09|Lasioglossum albipes|COI-5P|GU706031	A
BEEEE047-15|Lasioglossum albipes|COI-5P|KT074050	A
IBBP102-10|Lasioglossum albipes|COI-5P|JQ909747	A
GBACU1823-12|Lasioglossum albipes|COI-5P|KJ838595	A
GBCHA026-13|Lasioglossum albipes|COI-5P|KJ839354	A
BEEEE288-16|Lasioglossum albipes|COI-5P	A
ABBOL115-15|Lasioglossum albipes|COI-5P	A
ABBOL114-15|Lasioglossum albipes|COI-5P	A
GBAH0214-06|Lasioglossum albipes|COI-5P|AF103976	A
GBAH0215-06|Lasioglossum albipes|COI-5P|AF103977	A
FBAPB349-09|Lasioglossum albocinctum|COI-5P|HM401097	A
GBACU2954-13|Lasioglossum albocinctum|COI-5P|KJ838367	A
GBACU2957-13|Lasioglossum albocinctum|COI-5P|KJ836984	A
GBACU2956-13|Lasioglossum albocinctum|COI-5P|KJ837136	A
FBAPB348-09|Lasioglossum albocinctum|COI-5P|HM401096	A
GBACU2955-13|Lasioglossum albocinctum|COI-5P|KJ836968	A
GBACU2953-13|Lasioglossum albocinctum|COI-5P|KJ838953	A
FBAPD289-11|Lasioglossum albocinctum|COI-5P|KJ837421	A
FBAPD149-11|Lasioglossum albocinctum|COI-5P|KJ837006	A
LASNA083-08|Lasioglossum albocinctum|COI-5P	A
LASNA093-08|Lasioglossum albocinctum|COI-5P	A
GBMIN20015-13|Patellapis albofasciata|COI-5P|JQ266491	A
DLII1017-07|Lasioglossum albohirtum|COI-5P	A
DIAL1442-09|Lasioglossum albohirtum|COI-5P	A
DIAL1425-09|Lasioglossum albohirtum|COI-5P	A
DLII1152-08|Lasioglossum albohirtum|COI-5P|JF903496	A
DIAL1113-07|Lasioglossum albohirtum|COI-5P	A
DIAL1427-09|Lasioglossum albohirtum|COI-5P	A
BBHYA2329-12|Lasioglossum albohirtum|COI-5P	A
BBHYA1517-12|Lasioglossum albohirtum|COI-5P	A
DIAL1449-09|Lasioglossum albohirtum|COI-5P	A
BBHYA2784-12|Lasioglossum albohirtum|COI-5P	A
DIAL1151-07|Lasioglossum albohirtum|COI-5P	A
LASNA295-08|Lasioglossum albohirtum|COI-5P	A
LASNA389-08|Lasioglossum albohirtum|COI-5P	A
BBHYA1516-12|Lasioglossum albohirtum|COI-5P	A
DIAL1150-07|Lasioglossum albohirtum|COI-5P	A
DLII940-07|Lasioglossum albuquerquense|COI-5P	A
DLII1694-09|Lasioglossum albuquerquense|COI-5P	A
DLII1696-09|Lasioglossum albuquerquense|COI-5P	A
FBAPC861-11|Rophites algirus|COI-5P|KJ838756	A
FBHAP590-09|Rophites algirus|COI-5P|KJ836906	A
FBAPD503-11|Rophites algirus|COI-5P|KJ839593	A
FBAPD502-11|Rophites algirus|COI-5P|KJ839008	A
ABEE102-17|Rophites algirus|COI-5P	A
ABEE101-17|Rophites algirus|COI-5P	A
ABEE099-17|Rophites algirus|COI-5P	A
DLII936-07|Lasioglossum aliud|COI-5P	A
DLII1095-07|Lasioglossum aliud|COI-5P	A
DLII873-07|Lasioglossum aliud|COI-5P	A
DLII872-07|Lasioglossum aliud|COI-5P	A
ABBOL171-15|Lasioglossum allodalum|COI-5P	A
ABBOL172-15|Lasioglossum allodalum|COI-5P	A
GBAH0258-06|Lasioglossum alphenum|COI-5P|AF104663	A
FBAPB351-09|Lasioglossum alpigenum|COI-5P|KJ837857	A
FBAPB353-09|Lasioglossum alpigenum|COI-5P|KJ838767	A
FBAPC633-11|Dufourea alpina|COI-5P|KJ839615	A
FBAPB509-09|Dufourea alpina|COI-5P|KJ838580	A
GBACU3249-13|Dufourea alpina|COI-5P|KJ836840	A
FBAPB506-09|Dufourea alpina|COI-5P|HM401150	A
FBAPB507-09|Dufourea alpina|COI-5P|KJ836463	A
GBMIN11797-13|Sphecodes alternatus|COI-5P|JX256658	A
GBMIN11837-13|Sphecodes alternatus|COI-5P|JX256659	A
GBACU3073-13|Sphecodes alternatus|COI-5P|KJ837938	A
GBMIN19974-13|Lasioglossum altichum|COI-5P|JQ266456	A
BBHYA1548-12|Lasioglossum amicum|COI-5P	A
BBHYA3500-12|Lasioglossum amicum|COI-5P	A
BBHYA3013-12|Lasioglossum amicum|COI-5P	A
HALIC149-11|Corynura ampliata|COI-5P|KU983316	A
HALIC158-11|Corynura ampliata|COI-5P|KU983320	A
HALIC146-11|Corynura ampliata|COI-5P|KU983325	A
HALIC138-11|Corynura ampliata|COI-5P|KU983323	A
HALIC139-11|Corynura ampliata|COI-5P|KU983319	A
HALIC134-11|Corynura ampliata|COI-5P|KU983328	A
HALIC136-11|Corynura ampliata|COI-5P|KU983322	A
HALIC148-11|Corynura ampliata|COI-5P|KU983318	A
HALIC147-11|Corynura ampliata|COI-5P|KU983312	A
HALIC230-12|Corynura ampliata|COI-5P|KU983314	A
HALIC229-12|Corynura ampliata|COI-5P|KU983317	A
HALIC133-11|Corynura ampliata|COI-5P|KU983321	A
HALIC130-11|Corynura ampliata|COI-5P|KU983315	A
HALIC137-11|Corynura ampliata|COI-5P|KU983324	A
HALIC132-11|Corynura ampliata|COI-5P|KU983311	A
HALIC131-11|Corynura ampliata|COI-5P|KU983313	A
BOTWA1167-11|Corynura ampliata|COI-5P|KU983327	A
HALIC135-11|Corynura ampliata|COI-5P|KU983326	A
HALIC194-12|Halictillus amplilobus|COI-5P|KU983440	A
HALIC325-12|Halictillus amplilobus|COI-5P|KU983436	A
HALIC324-12|Halictillus amplilobus|COI-5P|KU983443	A
HALIC192-12|Halictillus amplilobus|COI-5P|KU983439	A
HALIC323-12|Halictillus amplilobus|COI-5P|KU983442	A
HALIC322-12|Halictillus amplilobus|COI-5P|KU983437	A
HALIC195-12|Halictillus amplilobus|COI-5P|KU983441	A
HALIC193-12|Halictillus amplilobus|COI-5P|KU983438	A
GBMIN19958-13|Patellapis andreniformis|COI-5P|JQ266488	A
BEECA540-06|Agapostemon angelicus|COI-5P	A
GBMIN77144-17|Agapostemon angelicus|COI-5P|KY887030	A
BEECB1065-07|Agapostemon angelicus|COI-5P	A
FBAPB358-09|Lasioglossum angusticeps|COI-5P|HM401098	A
FBAPB356-09|Lasioglossum angusticeps|COI-5P|KJ837784	A
FBAPB357-09|Lasioglossum angusticeps|COI-5P|HQ948051	A
DIAL323-06|Lasioglossum anomalum|COI-5P	A
UPOLB300-09|Lasioglossum anomalum|COI-5P	A
UPOLL406-09|Lasioglossum anomalum|COI-5P	A
UPOLL503-09|Lasioglossum anomalum|COI-5P	A
UPOLB424-09|Lasioglossum anomalum|COI-5P	A
UPOLL548-09|Lasioglossum anomalum|COI-5P	A
UPOLL651-09|Lasioglossum anomalum|COI-5P	A
UPOLL200-09|Lasioglossum anomalum|COI-5P	A
DLII1282-08|Lasioglossum anomalum|COI-5P	A
UPOLL627-09|Lasioglossum anomalum|COI-5P	A
DIAL568-06|Lasioglossum anomalum|COI-5P|JF903497	A
UPOLL130-09|Lasioglossum anomalum|COI-5P	A
ASGLE073-10|Lasioglossum anomalum|COI-5P|JN288344	A
UPOLB470-09|Lasioglossum anomalum|COI-5P	A
UPOLL504-09|Lasioglossum anomalum|COI-5P	A
UPOLB759-09|Lasioglossum anomalum|COI-5P	A
UPOLL185-09|Lasioglossum anomalum|COI-5P	A
JSHYO571-11|Lasioglossum anomalum|COI-5P|KR782766	A
UPOLL730-09|Lasioglossum anomalum|COI-5P	A
UPOLB276-09|Lasioglossum anomalum|COI-5P	A
UPOLL502-09|Lasioglossum anomalum|COI-5P	A
UPOLL818-09|Lasioglossum anomalum|COI-5P	A
UPOLL201-09|Lasioglossum anomalum|COI-5P	A
UPOLL875-09|Lasioglossum anomalum|COI-5P	A
UPOLB279-09|Lasioglossum anomalum|COI-5P	A
BARSM536-17|Lasioglossum anomalum|COI-5P|MG337817	A
UPOLB244-09|Lasioglossum anomalum|COI-5P	A
UPOLB407-09|Lasioglossum anomalum|COI-5P	A
JSHYO377-11|Lasioglossum anomalum|COI-5P|KR794709	A
UPOLB305-09|Lasioglossum anomalum|COI-5P	A
UPOLB475-09|Lasioglossum anomalum|COI-5P	A
UPOLB288-09|Lasioglossum anomalum|COI-5P	A
UPOLB318-09|Lasioglossum anomalum|COI-5P	A
UPOLB302-09|Lasioglossum anomalum|COI-5P	A
UPOLB406-09|Lasioglossum anomalum|COI-5P	A
UPOLB296-09|Lasioglossum anomalum|COI-5P	A
UPOLB307-09|Lasioglossum anomalum|COI-5P	A
BOWGF416-09|Lasioglossum anomalum|COI-5P|GU708187-SUPPRESSED	A
UPOLB297-09|Lasioglossum anomalum|COI-5P	A
JSHYO423-11|Lasioglossum anomalum|COI-5P|KR799355	A
UPOLB317-09|Lasioglossum anomalum|COI-5P	A
UPOLB289-09|Lasioglossum anomalum|COI-5P	A
RRMFI4391-15|Lasioglossum anomalum|COI-5P|MG342878	A
UPOLB304-09|Lasioglossum anomalum|COI-5P	A
UPOLB286-09|Lasioglossum anomalum|COI-5P	A
HEJUL008-12|Lasioglossum anomalum|COI-5P|KR784140	A
SMTPI9369-14|Lasioglossum anomalum|COI-5P|KR896824	A
UPOLB012-09|Lasioglossum anomalum|COI-5P	A
UPOLB357-09|Lasioglossum anomalum|COI-5P	A
DIAL159-06|Lasioglossum anomalum|COI-5P	A
JSHYN431-11|Lasioglossum anomalum|COI-5P|KR784910	A
DIAL002-06|Lasioglossum anomalum|COI-5P	A
UPOLL405-09|Lasioglossum anomalum|COI-5P	A
GBMIN19997-13|Lasioglossum anomalum|COI-5P|JQ266410	A
BEECC272-08|Augochloropsis anonyma|COI-5P	A
DLII440-07|Lasioglossum apocyni|COI-5P	A
DLII1693-09|Lasioglossum apocyni|COI-5P	A
DLII810-07|Lasioglossum apocyni|COI-5P	A
DLII701-07|Lasioglossum apocyni|COI-5P	A
DIAL973-06|Lasioglossum apocyni|COI-5P	A
DIAL985-06|Lasioglossum apocyni|COI-5P	A
DIAL981-06|Lasioglossum apocyni|COI-5P	A
DIAL983-06|Lasioglossum apocyni|COI-5P|JF903498	A
DIAL949-06|Lasioglossum apocyni|COI-5P	A
DIAL971-06|Lasioglossum apocyni|COI-5P	A
DLII811-07|Lasioglossum apocyni|COI-5P	A
DIAL004-06|Lasioglossum apocyni|COI-5P	A
DIAL015-06|Lasioglossum apocyni|COI-5P	A
DIAL003-06|Lasioglossum apocyni|COI-5P	A
DIAL001-06|Lasioglossum apocyni|COI-5P	A
DIAL013-06|Lasioglossum apocyni|COI-5P	A
DIAL014-06|Lasioglossum apocyni|COI-5P	A
MSAPB525-11|Lasioglossum apocyni|COI-5P	A
MSAPB688-11|Lasioglossum apocyni|COI-5P	A
MSAPB511-11|Lasioglossum apocyni|COI-5P	A
MSAPB571-11|Lasioglossum apocyni|COI-5P	A
MSAPB570-11|Lasioglossum apocyni|COI-5P	A
MSAPB510-11|Lasioglossum apocyni|COI-5P	A
MSAPB530-11|Lasioglossum apocyni|COI-5P	A
MSAPB528-11|Lasioglossum apocyni|COI-5P	A
MSAPB568-11|Lasioglossum apocyni|COI-5P	A
MSAPB482-11|Lasioglossum apocyni|COI-5P	A
MSAPB521-11|Lasioglossum apocyni|COI-5P	A
MSAPB689-11|Lasioglossum apocyni|COI-5P	A
MSAPB526-11|Lasioglossum apocyni|COI-5P	A
MSAPB516-11|Lasioglossum apocyni|COI-5P	A
MSAPB524-11|Lasioglossum apocyni|COI-5P	A
MSAPB512-11|Lasioglossum apocyni|COI-5P	A
MSAPB527-11|Lasioglossum apocyni|COI-5P	A
MSAPB687-11|Lasioglossum apocyni|COI-5P	A
MSAPB481-11|Lasioglossum apocyni|COI-5P	A
MSAPB531-11|Lasioglossum apocyni|COI-5P	A
MSAPB686-11|Lasioglossum apocyni|COI-5P	A
MSAPB520-11|Lasioglossum apocyni|COI-5P	A
MSAPB535-11|Lasioglossum apocyni|COI-5P	A
MSAPB495-11|Lasioglossum apocyni|COI-5P	A
MSAPB536-11|Lasioglossum apocyni|COI-5P	A
MSAPB496-11|Lasioglossum apocyni|COI-5P	A
MSAPB523-11|Lasioglossum apocyni|COI-5P	A
MSAPB494-11|Lasioglossum apocyni|COI-5P	A
MSAPB500-11|Lasioglossum apocyni|COI-5P	A
MSAPB509-11|Lasioglossum apocyni|COI-5P	A
MSAPB522-11|Lasioglossum apocyni|COI-5P	A
MSAPB517-11|Lasioglossum apocyni|COI-5P	A
MSAPB567-11|Lasioglossum apocyni|COI-5P	A
MSAPB569-11|Lasioglossum apocyni|COI-5P	A
MSAPB820-11|Lasioglossum apocyni|COI-5P	A
MSAPB837-11|Lasioglossum apocyni|COI-5P	A
MSAPB808-11|Lasioglossum apocyni|COI-5P	A
MSAPB839-11|Lasioglossum apocyni|COI-5P	A
MSAPB817-11|Lasioglossum apocyni|COI-5P	A
MSAPB818-11|Lasioglossum apocyni|COI-5P	A
MSAPB829-11|Lasioglossum apocyni|COI-5P	A
MSAPB819-11|Lasioglossum apocyni|COI-5P	A
MSAPB840-11|Lasioglossum apocyni|COI-5P	A
MSAPB827-11|Lasioglossum apocyni|COI-5P	A
MSAPB828-11|Lasioglossum apocyni|COI-5P	A
MSAPB838-11|Lasioglossum apocyni|COI-5P	A
DIAL1398-09|Lasioglossum apopkense|COI-5P	A
DIAL769-06|Lasioglossum apopkense|COI-5P	A
DIAL805-06|Lasioglossum apopkense|COI-5P	A
DIAL1388-09|Lasioglossum apopkense|COI-5P	A
DLII1219-08|Lasioglossum apopkense|COI-5P	A
DLII422-07|Lasioglossum apopkense|COI-5P	A
ABBOL103-15|Lasioglossum apristum|COI-5P	A
ABBOL102-15|Lasioglossum apristum|COI-5P	A
GBAH0216-06|Lasioglossum apristum|COI-5P|AF103978	A
DLII1150-08|Lasioglossum aquilae|COI-5P	A
DLII1151-08|Lasioglossum aquilae|COI-5P	A
DLIII014-09|Lasioglossum arantium|COI-5P|GU666312-SUPPRESSED	A
DLIII018-09|Lasioglossum arantium|COI-5P|GU666313	A
DLIII036-09|Lasioglossum arantium|COI-5P|GU666310-SUPPRESSED	A
DLIII043-09|Lasioglossum arantium|COI-5P	A
DIAL018-06|Lasioglossum arantium|COI-5P	A
DIAL019-06|Lasioglossum arantium|COI-5P	A
DLII769-07|Lasioglossum arcanum|COI-5P	A
DLII036-06|Lasioglossum arcanum|COI-5P	A
LASNA581-08|Augochlora ARG01|COI-5P	A
LASNA486-08|Augochlora ARG01|COI-5P	A
BOFTW092-08|Augochlora ARG01|COI-5P	A
BOFTW146-08|Augochlora ARG01|COI-5P	A
LASNA477-08|Augochloropsis ARG01|COI-5P	A
LASNA572-08|Augochloropsis ARG01|COI-5P	A
BOFTW017-08|Augochloropsis ARG01|COI-5P	A
DLII081-06|Lasioglossum arg01|COI-5P	A
DIAL052-06|Lasioglossum arg01|COI-5P	A
LASNA478-08|Neocorynura ARG01|COI-5P	A
LASNA573-08|Neocorynura ARG01|COI-5P	A
DIAL055-06|Lasioglossum arg03|COI-5P	A
DIAL051-06|Lasioglossum arg03|COI-5P	A
BOFTW015-08|Augochloropsis ARG04|COI-5P	A
DIAL056-06|Lasioglossum arg05|COI-5P	A
BOFTW055-08|Augochloropsis ARG08|COI-5P	A
BOFTW019-08|Augochloropsis ARG12|COI-5P	A
BEECB1032-07|Lasioglossum argemonis|COI-5P	A
DLII1678-09|Lasioglossum argemonis|COI-5P	A
BBHYA2126-12|Lasioglossum argemonis|COI-5P	A
DLII1097-07|Lasioglossum argemonis|COI-5P	A
BEECC213-08|Lasioglossum argemonis|COI-5P	A
BEECB172-07|Lasioglossum argemonis|COI-5P	A
DLII748-07|Halictus argilos|COI-5P	A
GBAH0187-06|Mexalictus arizonensis|COI-5P|AF102843	A
BEECB069-07|Sphecodes aroniae|COI-5P	A
BEECA415-06|Sphecodes arvensiformis|COI-5P	A
BEECA416-06|Sphecodes arvensiformis|COI-5P	A
BEECB790-07|Sphecodes arvensiformis|COI-5P	A
BEECB792-07|Sphecodes arvensiformis|COI-5P	A
BBHYA1321-12|Sphecodes arvensiformis|COI-5P	A
SDBEE191-12|Sphecodes arvensiformis|COI-5P	A
SDBEE214-12|Sphecodes arvensiformis|COI-5P	A
BOFWM047-08|Lasioglossum asaphes|COI-5P	A
GBAH0254-06|Lasioglossum asteris|COI-5P|AF104659	A
HDBNS152-03|Lasioglossum athabascense|COI-5P|FJ582269	A
HDBNS151-03|Lasioglossum athabascense|COI-5P|FJ582268	A
BEECC041-08|Lasioglossum athabascense|COI-5P|FJ582267	A
BEECC043-08|Lasioglossum athabascense|COI-5P|FJ582266	A
BEECB1058-07|Sphecodes atlantis|COI-5P	A
DLII1448-08|Lasioglossum atschinense|COI-5P	A
DLIII020-09|Lasioglossum atwoodi|COI-5P	A
DLII1659-09|Lasioglossum atwoodi|COI-5P	A
DLIII042-09|Lasioglossum atwoodi|COI-5P	A
DLII1662-09|Lasioglossum atwoodi|COI-5P	A
DLII1597-09|Lasioglossum atwoodi|COI-5P	A
DIAL1277-08|Lasioglossum atwoodi|COI-5P	A
DIAL1335-08|Lasioglossum atwoodi|COI-5P	A
DLIII032-09|Lasioglossum atwoodi|COI-5P	A
DLII1338-08|Lasioglossum atwoodi|COI-5P	A
DLII672-07|Lasioglossum atwoodi|COI-5P	A
DLIII022-09|Lasioglossum atwoodi|COI-5P	A
DIAL1309-08|Lasioglossum atwoodi|COI-5P	A
DLII1607-09|Lasioglossum atwoodi|COI-5P	A
DIAL1275-08|Lasioglossum atwoodi|COI-5P	A
BBHYA1166-12|Augochlorella aurata|COI-5P	A
CNPPE2237-12|Augochlorella aurata|COI-5P|KJ165935	A
UPOLB063-09|Augochlorella aurata|COI-5P	A
CNPPJ1444-12|Augochlorella aurata|COI-5P|KJ208459	A
JSHYN391-11|Augochlorella aurata|COI-5P|KR783175	A
ASGLE399-10|Augochlorella aurata|COI-5P|MG340227	A
CNGBJ1461-14|Augochlorella aurata|COI-5P|KR406096	A
UPOLB079-09|Augochlorella aurata|COI-5P	A
JSHYO468-11|Augochlorella aurata|COI-5P|KR801806	A
NCCC634-11|Augochlorella aurata|COI-5P|KR796627	A
BBHYA1168-12|Augochlorella aurata|COI-5P	A
BBHYA1914-12|Augochlorella aurata|COI-5P	A
BBHYA1924-12|Augochlorella aurata|COI-5P	A
BBHYA1615-12|Augochlorella aurata|COI-5P	A
BBHYA2568-12|Augochlorella aurata|COI-5P	A
DIAL064-06|Augochlorella aurata|COI-5P	A
UPOLL710-09|Augochlorella aurata|COI-5P	A
JSHYO168-11|Augochlorella aurata|COI-5P|KR802263	A
BBHYA1169-12|Augochlorella aurata|COI-5P	A
BBHYA1178-12|Augochlorella aurata|COI-5P	A
BBHYA1620-12|Augochlorella aurata|COI-5P	A
BBHYA1171-12|Augochlorella aurata|COI-5P	A
BBHYA1170-12|Augochlorella aurata|COI-5P	A
BBHEC098-09|Augochlorella aurata|COI-5P|GU690110	A
JSHYM512-11|Augochlorella aurata|COI-5P|KR789080	A
DIAL176-06|Augochlorella aurata|COI-5P	A
DIAL153-06|Augochlorella aurata|COI-5P	A
BBHYA2565-12|Augochlorella aurata|COI-5P	A
JSHYP104-11|Augochlorella aurata|COI-5P|KR793518	A
UPOLL750-09|Augochlorella aurata|COI-5P	A
UPOLB054-09|Augochlorella aurata|COI-5P	A
UPOLL769-09|Augochlorella aurata|COI-5P	A
JSHYN151-11|Augochlorella aurata|COI-5P|KR782756	A
UPOLL895-09|Augochlorella aurata|COI-5P	A
UPOLL906-09|Augochlorella aurata|COI-5P	A
TTHYW970-08|Augochlorella aurata|COI-5P|KR874808	A
BBHYA1618-12|Augochlorella aurata|COI-5P	A
JSHYN905-11|Augochlorella aurata|COI-5P|KR800924	A
CNPPF1217-12|Augochlorella aurata|COI-5P|KJ165128	A
BEECB856-07|Augochlorella aurata|COI-5P|FJ582095	A
BBHYA1487-12|Augochlorella aurata|COI-5P	A
BBHEC992-10|Augochlorella aurata|COI-5P|HM414532	A
BBHEC526-09|Augochlorella aurata|COI-5P|KR785346	A
UPOLB869-09|Augochlorella aurata|COI-5P	A
UPOLB248-09|Augochlorella aurata|COI-5P	A
BEEMH038-06|Augochlorella aurata|COI-5P|MG337506	A
PREXP228-14|Augochlorella aurata|COI-5P|KR890458	A
BBHYA1330-12|Augochlorella aurata|COI-5P	A
JSHYP148-11|Augochlorella aurata|COI-5P|KR807122	A
JSJUL1785-11|Augochlorella aurata|COI-5P|KR803822	A
BEECC433-08|Augochlorella aurata|COI-5P	A
UPOLL572-09|Augochlorella aurata|COI-5P	A
JSJUL1653-11|Augochlorella aurata|COI-5P|KR788445	A
BEEMH298-06|Augochlorella aurata|COI-5P|MG340301	A
CNPPF1193-12|Augochlorella aurata|COI-5P|KJ166383	A
CNPPI1325-12|Augochlorella aurata|COI-5P|KJ445526	A
JSHYO949-11|Augochlorella aurata|COI-5P|KR803760	A
JSHYO421-11|Augochlorella aurata|COI-5P|KR798943	A
JSHYN916-11|Augochlorella aurata|COI-5P|KR798700	A
JSHYO323-11|Augochlorella aurata|COI-5P|KR802904	A
JSHYO365-11|Augochlorella aurata|COI-5P|KR804947	A
JSHYO348-11|Augochlorella aurata|COI-5P|KR803589	A
CNPPB2180-12|Augochlorella aurata|COI-5P|KJ091685	A
CNPPF238-12|Augochlorella aurata|COI-5P|KJ164123	A
CNPPE1230-12|Augochlorella aurata|COI-5P|KJ093195	A
CNPPG869-12|Augochlorella aurata|COI-5P|MG341600	A
PHMTX616-11|Augochlorella aurata|COI-5P|MG337359	A
CNPPE1268-12|Augochlorella aurata|COI-5P|KJ166649	A
CNPPA3661-12|Augochlorella aurata|COI-5P|KJ087507	A
BBHEC525-09|Augochlorella aurata|COI-5P|HQ928878	A
HCBNS080-03|Augochlorella aurata|COI-5P|FJ582093	A
CNPPE1267-12|Augochlorella aurata|COI-5P|MG339272	A
HDBNS241-05|Augochlorella aurata|COI-5P|FJ582098	A
HDBNS243-05|Augochlorella aurata|COI-5P|FJ582099	A
HDBNS242-05|Augochlorella aurata|COI-5P|FJ582100	A
HDBNS244-05|Augochlorella aurata|COI-5P|FJ582097	A
HCBNS082-03|Augochlorella aurata|COI-5P|FJ582096	A
HCBNS081-03|Augochlorella aurata|COI-5P|FJ582094	A
CNPPB2183-12|Augochlorella aurata|COI-5P|KJ088207	A
CNPPG929-12|Augochlorella aurata|COI-5P|MG342514	A
BOTWA1182-11|Corynura aureoviridis|COI-5P|KU983331	A
BOTWA1208-11|Corynura aureoviridis|COI-5P|KU983342	A
HALIC120-11|Corynura aureoviridis|COI-5P|KU983336	A
HALIC112-11|Corynura aureoviridis|COI-5P|KU983332	A
HALIC121-11|Corynura aureoviridis|COI-5P|KU983335	A
HALIC118-11|Corynura aureoviridis|COI-5P|KU983337	A
HALIC117-11|Corynura aureoviridis|COI-5P|KU983334	A
HALIC119-11|Corynura aureoviridis|COI-5P|KU983338	A
HALIC113-11|Corynura aureoviridis|COI-5P|KU983339	A
HALIC116-11|Corynura aureoviridis|COI-5P|KU983343	A
HALIC114-11|Corynura aureoviridis|COI-5P|KU983340	A
HALIC115-11|Corynura aureoviridis|COI-5P|KU983341	A
HALIC215-12|Corynura aureoviridis|COI-5P|KU983333	A
BOTWA1223-11|Corynura aureoviridis|COI-5P|KU983330	A
BOTWA1222-11|Corynura aureoviridis|COI-5P|KU983329	A
MSAPB847-11|Lasioglossum AUSspI|COI-5P	A
HYAS1009-11|Lipotriches australica|COI-5P	A
TDWGB170-10|Sphecodes autumnalis|COI-5P|HQ978806	A
JSHYO600-11|Sphecodes autumnalis|COI-5P|KR806035	A
JSHYO413-11|Sphecodes autumnalis|COI-5P|KR802244	A
BBHEC108-09|Sphecodes autumnalis|COI-5P|GU690107	A
RBINA4150-13|Sphecodes autumnalis|COI-5P|KR882142	A
HDBNS197-04|Sphecodes autumnalis|COI-5P|FJ582461	A
GBMIN20021-13|Sphecodes autumnalis|COI-5P|JQ266477	A
HDBNS195-04|Sphecodes autumnalis|COI-5P|FJ582462	A
BEECA085-06|Sphecodes autumnalis|COI-5P|FJ582459	A
BEECA084-06|Sphecodes autumnalis|COI-5P|FJ582460	A
DLII1684-09|Lasioglossum avalonense|COI-5P	A
BEECB1033-07|Lasioglossum avalonense|COI-5P	A
HALIC349-12|Halictillus badiclypeus|COI-5P|KU983444	A
HALIC317-12|Halictillus badiclypeus|COI-5P|KU983449	A
HALIC316-12|Halictillus badiclypeus|COI-5P|KU983450	A
HALIC319-12|Halictillus badiclypeus|COI-5P|KU983447	A
HALIC348-12|Halictillus badiclypeus|COI-5P|KU983445	A
HALIC320-12|Halictillus badiclypeus|COI-5P|KU983452	A
HALIC315-12|Halictillus badiclypeus|COI-5P|KU983448	A
HALIC314-12|Halictillus badiclypeus|COI-5P|KU983446	A
HALIC318-12|Halictillus badiclypeus|COI-5P|KU983451	A
GBAH2529-07|Lasioglossum baleicum|COI-5P|AB299368	A
GBAH5248-09|Lasioglossum baleicum|COI-5P|AB299367	A
ABBOL133-15|Lasioglossum baleicum|COI-5P	A
ABBOL134-15|Lasioglossum baleicum|COI-5P	A
DIAL504-06|Lasioglossum batya|COI-5P	A
DIAL506-06|Lasioglossum batya|COI-5P	A
GBMIN20008-13|Lasioglossum baudini|COI-5P|JQ266386	A
FBAPC554-11|Lasioglossum bavaricum|COI-5P|KJ836737	A
FBAPC553-11|Lasioglossum bavaricum|COI-5P|KJ838236	A
LASNA782-08|Xeralictus bicuspidariae|COI-5P	A
LASNA688-08|Xeralictus bicuspidariae|COI-5P	A
PREXP227-14|Lasioglossum birkmanni|COI-5P|KR874142	A
TTMHY621-11|Lasioglossum birkmanni|COI-5P|KR876902	A
TTMHY619-11|Lasioglossum birkmanni|COI-5P|KR874958	A
BWTWO868-10|Lasioglossum birkmanni|COI-5P|HM405320	A
DLII1710-09|Lasioglossum birkmanni|COI-5P|KF199925	A
TTMHY484-08|Lasioglossum birkmanni|COI-5P|GU806737	A
BOWGF301-09|Lasioglossum birkmanni|COI-5P|GU708102	A
RRINV444-15|Lasioglossum birkmanni|COI-5P|KT705771	A
CNPPD1977-12|Lasioglossum birkmanni|COI-5P|KJ084863	A
BOWGF302-09|Lasioglossum birkmanni|COI-5P|GU708101	A
DIAL400-06|Lasioglossum birkmanni|COI-5P|KF199921	A
DIAL398-06|Lasioglossum birkmanni|COI-5P|KF199924	A
DIAL802-06|Lasioglossum birkmanni|COI-5P|KF199923	A
SSROB4641-14|Lasioglossum birkmanni|COI-5P|KR901846	A
DLII1585-09|Lasioglossum birkmanni|COI-5P|KF199920	A
DIAL399-06|Lasioglossum birkmanni|COI-5P|KF199922	A
FBAPB368-09|Lasioglossum bluethgeni|COI-5P|HM401099	A
LASNA362-08|Lasioglossum BOL-01|COI-5P	A
LASNA456-08|Lasioglossum BOL-01|COI-5P	A
LASNA363-08|Lasioglossum BOL-02|COI-5P	A
LASNA457-08|Lasioglossum BOL-02|COI-5P	A
LASNA458-08|Lasioglossum BOL-03|COI-5P	A
LASNA364-08|Lasioglossum BOL-03|COI-5P	A
DLII573-07|Temnosoma BOL02|COI-5P	A
JSYKA139-10|Lasioglossum boreale|COI-5P|HM860312	A
JSYKA133-10|Lasioglossum boreale|COI-5P|HM860307	A
JSYKA136-10|Lasioglossum boreale|COI-5P|HM860309	A
JSYKA137-10|Lasioglossum boreale|COI-5P|HM860310	A
JSYKA135-10|Lasioglossum boreale|COI-5P|HM860308	A
JSYKA615-10|Lasioglossum boreale|COI-5P|HQ569281	A
JSYKA132-10|Lasioglossum boreale|COI-5P|HM860306	A
JSYKA613-10|Lasioglossum boreale|COI-5P|JN272462	A
JSYKA138-10|Lasioglossum boreale|COI-5P|HM860311	A
JSYKA612-10|Lasioglossum boreale|COI-5P|JN272461	A
HMBCH031-07|Lasioglossum boreale|COI-5P|JX833226	A
HMBCH077-07|Lasioglossum boreale|COI-5P|JX828876	A
HMBCH073-07|Lasioglossum boreale|COI-5P|JX830207	A
HMBCH030-07|Lasioglossum boreale|COI-5P|JX831186	A
HMBCH022-07|Lasioglossum boreale|COI-5P|JX830198	A
BEECA618-06|Lasioglossum boreale|COI-5P|KF199928	A
HMBCH062-07|Lasioglossum boreale|COI-5P|JX830237	A
BEECA619-06|Lasioglossum boreale|COI-5P|KF199929	A
BEECA616-06|Lasioglossum boreale|COI-5P|KF199927	A
BEECA620-06|Lasioglossum boreale|COI-5P|KF199930	A
HMBCH078-07|Lasioglossum boreale|COI-5P|JX828851	A
HMBCH076-07|Lasioglossum boreale|COI-5P|JX830193	A
JBHCH392-10|Lasioglossum boreale|COI-5P|JX831587	A
HMBCH029-07|Lasioglossum boreale|COI-5P|JX830562	A
BEECA617-06|Lasioglossum boreale|COI-5P|KF199926	A
HMBCH079-07|Lasioglossum boreale|COI-5P|JX829881	A
BBHYM232-09|Lasioglossum boreale|COI-5P|HM374736	A
HMBCH028-07|Lasioglossum boreale|COI-5P|JX830873	A
HMBCH075-07|Lasioglossum boreale|COI-5P|JX831802	A
HMBCH074-07|Lasioglossum boreale|COI-5P|JX830614	A
SSDWA5433-15|Lasioglossum boreale|COI-5P|MG340392	A
GBAH0217-06|Lasioglossum boreale|COI-5P|AF103979	A
GBMIN19968-13|Pseudagapostemon brasiliensis|COI-5P|JQ266468	A
GBMIN20031-13|Patellapis braunsella|COI-5P|JQ266457	A
MSAPB854-11|Lasioglossum bremerense|COI-5P	A
MSAPB855-11|Lasioglossum bremerense|COI-5P	A
FBAPB369-09|Lasioglossum brevicorne|COI-5P|HQ948052	A
FBAPB371-09|Lasioglossum brevicorne|COI-5P|HQ948053	A
GBMIN77151-17|Lasioglossum brevicorne|COI-5P|KX374792	A
GBAH0453-06|Lasioglossum brevicorne|COI-5P|AF435358	A
FBAPC1006-11|Lasioglossum breviventre|COI-5P|KJ839235	A
FBAPC570-11|Lasioglossum breviventre|COI-5P|KJ836700	A
FBAPB373-09|Lasioglossum breviventre|COI-5P|KJ838924	A
HALIC109-11|Corynura bruchiana|COI-5P|KU983353	A
HALIC105-11|Corynura bruchiana|COI-5P|KU983352	A
HALIC104-11|Corynura bruchiana|COI-5P|KU983347	A
HALIC102-11|Corynura bruchiana|COI-5P|KU983346	A
HALIC110-11|Corynura bruchiana|COI-5P|KU983350	A
HALIC107-11|Corynura bruchiana|COI-5P|KU983345	A
HALIC111-11|Corynura bruchiana|COI-5P|KU983348	A
HALIC103-11|Corynura bruchiana|COI-5P|KU983344	A
HALIC106-11|Corynura bruchiana|COI-5P|KU983349	A
HALIC211-12|Corynura bruchiana|COI-5P|KU983351	A
DIAL814-06|Lasioglossum bruneri|COI-5P	A
DIAL041-06|Lasioglossum bruneri|COI-5P	A
DIAL040-06|Lasioglossum bruneri|COI-5P	A
DIAL459-06|Lasioglossum bruneri|COI-5P	A
DIAL067-06|Lasioglossum bruneri|COI-5P	A
DIAL325-06|Lasioglossum bruneri|COI-5P	A
DIAL324-06|Lasioglossum bruneri|COI-5P	A
DIAL326-06|Lasioglossum bruneri|COI-5P	A
DIAL1188-08|Lasioglossum bruneri|COI-5P	A
DLII1342-08|Lasioglossum bruneri|COI-5P	A
DIAL414-06|Lasioglossum bruneri|COI-5P	A
DIAL497-06|Lasioglossum bruneri|COI-5P	A
DLII397-07|Lasioglossum bruneri|COI-5P	A
DIAL939-06|Lasioglossum bruneri|COI-5P	A
DIAL922-06|Lasioglossum bruneri|COI-5P	A
SMTPD5180-13|Lasioglossum bruneri|COI-5P|KR889109	A
DLII716-07|Lasioglossum bruneri|COI-5P|JF903499	A
DIAL849-06|Lasioglossum bruneri|COI-5P	A
DLII009-06|Lasioglossum bruneri|COI-5P	A
DLII450-07|Lasioglossum bruneri|COI-5P	A
BWTWO1090-10|Lasioglossum bruneri|COI-5P|HQ937903-SUPPRESSED	A
CNPPF1177-12|Lasioglossum bruneri|COI-5P|KJ165284	A
CNPPF1213-12|Lasioglossum bruneri|COI-5P|KJ167522	A
CNPPE1237-12|Lasioglossum bruneri|COI-5P|KJ163905	A
CNPPF233-12|Lasioglossum bruneri|COI-5P|KJ166110	A
BWTWO1066-10|Lasioglossum bruneri|COI-5P	A
DIAL1385-09|Lasioglossum bruneri|COI-5P	A
BWTWO1078-10|Lasioglossum bruneri|COI-5P	A
DIAL1291-08|Lasioglossum bruneri|COI-5P	A
DIAL012-06|Lasioglossum bruneri|COI-5P	A
DIAL1186-08|Lasioglossum bruneri|COI-5P	A
DIAL1187-08|Lasioglossum bruneri|COI-5P	A
MBIOK499-14|Lasioglossum bruneri|COI-5P|KR805207	A
SMTPJ5235-14|Lasioglossum bruneri|COI-5P|KR886474	A
DIAL1438-09|Lasioglossum brunneiventre|COI-5P	A
DLII1382-08|Lasioglossum brunneiventre|COI-5P|JF903500	A
DIAL1413-09|Lasioglossum brunneiventre|COI-5P	A
DLII937-07|Lasioglossum brunneiventre|COI-5P	A
DLII1371-08|Lasioglossum brunneiventre|COI-5P	A
DLII1051-07|Lasioglossum brunneiventre|COI-5P	A
DIAL1431-09|Lasioglossum brunneiventre|COI-5P	A
DLII1068-07|Lasioglossum brunneiventre|COI-5P	A
DLII315-07|Lasioglossum brunneiventre|COI-5P	A
DLII319-07|Lasioglossum brunneiventre|COI-5P	A
DLII309-07|Lasioglossum brunneiventre|COI-5P	A
DLII927-07|Lasioglossum brunneiventre|COI-5P	A
DLII928-07|Lasioglossum brunneiventre|COI-5P	A
DLII325-07|Lasioglossum brunneiventre|COI-5P	A
ABEE219-17|Lasioglossum buccale|COI-5P	A
ABEE096-17|Lasioglossum buccale|COI-5P	A
BEECA819-07|Augochlora buscki|COI-5P	A
BEECA818-07|Augochlora buscki|COI-5P	A
BEECA813-07|Augochlora buscki|COI-5P	A
FBHAP673-09|Lasioglossum calceatum|COI-5P|GU706037	A
GBACU1292-12|Lasioglossum calceatum|COI-5P|KJ839059	A
GBACU1840-12|Lasioglossum calceatum|COI-5P|KJ839621	A
GBACU1295-12|Lasioglossum calceatum|COI-5P|KJ836542	A
GBCHA030-13|Lasioglossum calceatum|COI-5P|KJ836623	A
GBACU1294-12|Lasioglossum calceatum|COI-5P|KJ838961	A
NOBEE079-09|Lasioglossum calceatum|COI-5P	A
GBACU2351-13|Lasioglossum calceatum|COI-5P|KJ838143	A
GBACU2429-13|Lasioglossum calceatum|COI-5P|KJ837152	A
GBCHA029-13|Lasioglossum calceatum|COI-5P|KJ837853	A
GBACU1291-12|Lasioglossum calceatum|COI-5P|KJ839188	A
GBACU1838-12|Lasioglossum calceatum|COI-5P|KJ839203	A
GBACU1290-12|Lasioglossum calceatum|COI-5P|KJ837251	A
FBHAP675-09|Lasioglossum calceatum|COI-5P|GU706035	A
FBHAP672-09|Lasioglossum calceatum|COI-5P|GU706033	A
FBHAP674-09|Lasioglossum calceatum|COI-5P|GU706036	A
FBHAP181-09|Lasioglossum calceatum|COI-5P|KJ839190	A
GBACU1293-12|Lasioglossum calceatum|COI-5P|KJ837671	A
GBACU1841-12|Lasioglossum calceatum|COI-5P|KJ839535	A
ABBOL083-15|Lasioglossum calceatum|COI-5P	A
LASNA402-08|Lasioglossum calceatum|COI-5P	A
LASNA308-08|Lasioglossum calceatum|COI-5P	A
GBCHA032-13|Lasioglossum calceatum|COI-5P|KJ837221	A
FBAPD145-11|Lasioglossum calceatum|COI-5P|KJ839383	A
IBBP103-10|Lasioglossum calceatum|COI-5P|JQ909748	A
IBBP107-10|Lasioglossum calceatum|COI-5P|JQ909752	A
IBBP120-10|Lasioglossum calceatum|COI-5P|JQ909765	A
IBBP121-10|Lasioglossum calceatum|COI-5P|JQ909766	A
IBBP115-10|Lasioglossum calceatum|COI-5P|JQ909760	A
IBBP106-10|Lasioglossum calceatum|COI-5P|JQ909751	A
IBBP105-10|Lasioglossum calceatum|COI-5P|JQ909750	A
IBBP104-10|Lasioglossum calceatum|COI-5P|JQ909749	A
IBBP112-10|Lasioglossum calceatum|COI-5P|JQ909757	A
IBBP116-10|Lasioglossum calceatum|COI-5P|JQ909761	A
IBBP111-10|Lasioglossum calceatum|COI-5P|JQ909756	A
IBBP122-10|Lasioglossum calceatum|COI-5P|JQ909742	A
IBBP124-10|Lasioglossum calceatum|COI-5P|JQ909768	A
NOBEE078-09|Lasioglossum calceatum|COI-5P	A
NOBEE080-09|Lasioglossum calceatum|COI-5P	A
GBACU1296-12|Lasioglossum calceatum|COI-5P|KJ839380	A
BEEEE246-15|Lasioglossum calceatum|COI-5P	A
BEEEE267-16|Lasioglossum calceatum|COI-5P	A
BEEEE287-16|Lasioglossum calceatum|COI-5P	A
BEEEE048-15|Lasioglossum calceatum|COI-5P|KT074051	A
GBMIN77152-17|Lasioglossum calceatum|COI-5P|KX374802	A
GBMIN77163-17|Lasioglossum calceatum|COI-5P|KX374806	A
GBMIN77153-17|Lasioglossum calceatum|COI-5P|KX374814	A
GBMIN77157-17|Lasioglossum calceatum|COI-5P|KX374809	A
GBMIN77160-17|Lasioglossum calceatum|COI-5P|KX374808	A
GBMIN77162-17|Lasioglossum calceatum|COI-5P|KX374810	A
GBMIN77155-17|Lasioglossum calceatum|COI-5P|KX374804	A
GBMIN77154-17|Lasioglossum calceatum|COI-5P|KX374816	A
GBMIN77159-17|Lasioglossum calceatum|COI-5P|KX374811	A
GBMIN77161-17|Lasioglossum calceatum|COI-5P|KX957906	A
GBMIN77156-17|Lasioglossum calceatum|COI-5P|KX957907	A
GBMIN77158-17|Lasioglossum calceatum|COI-5P|KX374817	A
BEEEE049-15|Lasioglossum calceatum|COI-5P|KT074052	A
FBACB709-11|Lasioglossum calceatum|COI-5P|KJ838699	A
BEEEE321-16|Lasioglossum calceatum|COI-5P	A
GBAH0218-06|Lasioglossum calceatum|COI-5P|AF103980	A
ABBOL137-15|Lasioglossum calceatum|COI-5P	A
DIAL1047-06|Lasioglossum callidum|COI-5P	A
DIAL1044-06|Lasioglossum callidum|COI-5P	A
DIAL775-06|Lasioglossum callidum|COI-5P	A
DIAL078-06|Lasioglossum callidum|COI-5P	A
DIAL1012-06|Lasioglossum callidum|COI-5P	A
DIAL368-06|Lasioglossum callidum|COI-5P	A
DIAL369-06|Lasioglossum callidum|COI-5P	A
DIAL512-06|Lasioglossum callidum|COI-5P	A
DIAL462-06|Lasioglossum callidum|COI-5P	A
DIAL482-06|Lasioglossum callidum|COI-5P	A
DLII1339-08|Lasioglossum callidum|COI-5P	A
DLII1384-08|Lasioglossum callidum|COI-5P	A
DIAL499-06|Lasioglossum callidum|COI-5P	A
DIAL1053-06|Lasioglossum callidum|COI-5P	A
DIAL467-06|Lasioglossum callidum|COI-5P	A
DIAL1048-06|Lasioglossum callidum|COI-5P	A
DIAL1015-06|Lasioglossum callidum|COI-5P	A
DIAL774-06|Lasioglossum callidum|COI-5P	A
DIAL850-06|Lasioglossum callidum|COI-5P	A
DIAL869-06|Lasioglossum callidum|COI-5P	A
DIAL853-06|Lasioglossum callidum|COI-5P	A
DLII017-06|Lasioglossum callidum|COI-5P	A
DIAL880-06|Lasioglossum callidum|COI-5P	A
DIAL1046-06|Lasioglossum callidum|COI-5P	A
DIAL771-06|Lasioglossum callidum|COI-5P	A
DIAL465-06|Lasioglossum callidum|COI-5P	A
DIAL810-06|Lasioglossum callidum|COI-5P	A
DIAL030-06|Lasioglossum callidum|COI-5P	A
DIAL436-06|Lasioglossum callidum|COI-5P	A
DIAL437-06|Lasioglossum callidum|COI-5P	A
DIAL424-06|Lasioglossum callidum|COI-5P	A
LASNA025-08|Lasioglossum callidum|COI-5P	A
DIAL872-06|Lasioglossum callidum|COI-5P	A
GBAH0239-06|Lasioglossum callizonium|COI-5P|AF104644	A
GBMIN20067-13|Lasioglossum callomelittinum|COI-5P|JQ266385	A
GBMIN20006-13|Lasioglossum calophyllae|COI-5P|JQ266390	A
ABEE159-17|Rhophitoides canus|COI-5P	A
FBAPD496-11|Rophites canus|COI-5P|KJ837844	A
DIAL728-06|Lasioglossum carlinvillense|COI-5P|FJ663058	A
DIAL837-06|Lasioglossum carlinvillense|COI-5P|FJ663060	A
DIAL832-06|Lasioglossum carlinvillense|COI-5P|FJ663059	A
UPOLL030-09|Sphecodes carolinus|COI-5P	A
UPOLL926-09|Sphecodes carolinus|COI-5P	A
UPOLL211-09|Sphecodes carolinus|COI-5P	A
MSAPB1235-12|Homalictus cassiaefloris|COI-5P	A
GBMIN19977-13|Patellapis castanea|COI-5P|JQ266450	A
DIAL1177-08|Lasioglossum cattellae|COI-5P	A
DLII1496-08|Lasioglossum cattellae|COI-5P	A
DLII1490-08|Lasioglossum cattellae|COI-5P	A
BHTT050-09|Lasioglossum cattellae|COI-5P	A
BHTT052-09|Lasioglossum cattellae|COI-5P	A
DLIII011-09|Lasioglossum cattellae|COI-5P	A
DIAL1317-08|Lasioglossum cattellae|COI-5P	A
DIAL1265-08|Lasioglossum cattellae|COI-5P	A
LASNA048-08|Lasioglossum cave teg grp|COI-5P	A
DLII1396-08|Lasioglossum ceanothi|COI-5P	A
BOWGF1452-10|Lasioglossum ceanothi|COI-5P|HM905722-SUPPRESSED	A
VARIA003-15|Seladonia cephalica|COI-5P|KT601641	A
VARIA005-15|Seladonia cephalica|COI-5P|KT601642	A
DIAL1407-09|Lasioglossum cephalotes|COI-5P|JF903501	A
GBMIN11775-13|Sphecodes cephalotes|COI-5P|JX256710	A
BOFWM058-08|Augochloropsis cf. metallica|COI-5P	A
SDBEE173-12|Dufourea cf. mulleri|COI-5P	A
SDBEE172-12|Dufourea cf. mulleri|COI-5P	A
DLII847-07|Lasioglossum cf. albohirtum|COI-5P	A
DLII848-07|Lasioglossum cf. albohirtum|COI-5P	A
DLII1010-07|Lasioglossum cf. albohirtum|COI-5P	A
DLII298-07|Lasioglossum cf. pilosellum|COI-5P	A
DLII286-07|Lasioglossum cf. pilosellum|COI-5P	A
DLII292-07|Lasioglossum cf. pilosellum|COI-5P	A
DIAL1127-07|Lasioglossum cf. ephialtum|COI-5P	A
DIAL1074-06|Lasioglossum cf. ephialtum|COI-5P	A
DIAL649-06|Lasioglossum cf. ephialtum|COI-5P	A
DIAL655-06|Lasioglossum cf. ephialtum|COI-5P	A
DLII290-07|Lasioglossum cf. marinense|COI-5P	A
DLII304-07|Lasioglossum cf. marinense|COI-5P	A
DLII284-07|Lasioglossum cf. marinense|COI-5P	A
BEECB212-07|Lasioglossum cf. latum|COI-5P	A
DLII968-07|Lasioglossum cf. marinense|COI-5P	A
DLII991-07|Lasioglossum cf. marinense|COI-5P	A
DIAL1263-08|Lasioglossum cf. latum|COI-5P	A
DIAL954-06|Lasioglossum cf. ephialtum|COI-5P	A
BWTWO1123-10|Lasioglossum cf. latum|COI-5P	A
DLII1160-08|Lasioglossum cf. latum|COI-5P	A
DLII705-07|Lasioglossum cf. latum|COI-5P	A
DLII1146-08|Lasioglossum cf. latum|COI-5P	A
DLII827-07|Lasioglossum cf. latum|COI-5P	A
DIAL692-06|Lasioglossum cf. latum|COI-5P	A
DLII1281-08|Lasioglossum cf. stuartense|COI-5P	A
SDBEE182-12|Lasioglossum cf. Ovaliceps|COI-5P	A
SDBEE181-12|Lasioglossum cf. mellipes|COI-5P	A
SDBEE186-12|Lasioglossum cf. titusi|COI-5P	A
ARTNO143-17|Lasioglossum cf. calceatum|COI-5P	A
SDBEE183-12|Lasioglossum cf. robustum|COI-5P	A
SDBEE185-12|Lasioglossum cf. sisymbrii|COI-5P	A
SDBEE184-12|Lasioglossum cf. sisymbrii|COI-5P	A
GBMIN19970-13|Patellapis cf. minutior n. JG-2011|COI-5P|JQ266464	A
GMGSF422-12|Sphecodes cf. smilacinae|COI-5P	A
BEECB092-07|Sphecodes cf. persimilis|COI-5P	A
BEECB709-07|Sphecodes cf. persimilis|COI-5P	A
BEECB497-07|Sphecodes cf. persimilis|COI-5P	A
BEECB520-07|Sphecodes cf. persimilis|COI-5P	A
BEECB482-07|Sphecodes cf. persimilis|COI-5P	A
BEECB211-07|Micralictoides chaenactidis|COI-5P	A
BOFTH427-09|Curvinomia chalybeata|COI-5P	A
GBMIN20066-13|Lasioglossum chapmani|COI-5P|JQ266387	A
DLII532-07|Lasioglossum CHI03|COI-5P|KX820386	A
DLII534-07|Lasioglossum CHI04|COI-5P|KX820520	A
BOTWC1042-11|Corynura chilensis|COI-5P|KU983362	A
BOTWA1231-11|Corynura chilensis|COI-5P|KU983359	A
BOTWA1211-11|Corynura chilensis|COI-5P|KU983364	A
BOTWC1045-11|Corynura chilensis|COI-5P|KU983361	A
BOTWC1044-11|Corynura chilensis|COI-5P|KU983360	A
BOTWC1041-11|Corynura chilensis|COI-5P|KU983356	A
HALIC210-12|Corynura chilensis|COI-5P|KU983355	A
BOTWC696-10|Corynura chilensis|COI-5P|KU983357	A
BOTWA1209-11|Corynura chilensis|COI-5P|KU983354	A
BOTWA1227-11|Corynura chilensis|COI-5P|KU983363	A
HALIC100-11|Corynura chilensis|COI-5P|KU983358	A
HALIC346-12|Corynura chloris|COI-5P|KU983365	A
BOTWC689-10|Corynura chloris|COI-5P|KU983367	A
BOTWC690-10|Corynura chloris|COI-5P|KU983366	A
DLII817-07|Lasioglossum cinctipes|COI-5P|KF199931	A
SMTPB10142-13|Lasioglossum cinctipes|COI-5P|KR875015	A
BEECB166-07|Lasioglossum cinctipes|COI-5P|FJ582270	A
GBAH0219-06|Lasioglossum cinctipes|COI-5P|AF103981	A
BOFWM039-08|Lasioglossum circinatum|COI-5P	A
GBMIN20007-13|Lasioglossum clelandi|COI-5P|JQ266388	A
BEECB1043-07|Sphecodes clematidis|COI-5P|FJ582468	A
BEECB1042-07|Sphecodes clematidis|COI-5P|FJ582469	A
BEECB791-07|Sphecodes clematidis|COI-5P	A
SMTPM5233-15|Sphecodes clematidis|COI-5P|MG335436	A
BEECA107-06|Sphecodes clematidis|COI-5P|FJ582467	A
GBMIN19963-13|Sphecodes clematidis|COI-5P|JQ266478	A
DLII1085-07|Lasioglossum clematisellum|COI-5P	A
DLII783-07|Lasioglossum clematisellum|COI-5P	A
DLII755-07|Lasioglossum clematisellum|COI-5P	A
DIAL1108-07|Lasioglossum clematisellum|COI-5P	A
GBACU2177-13|Lasioglossum clypeare|COI-5P|KJ837961	A
ABEE225-17|Lasioglossum clypeare|COI-5P	A
LASNA716-08|Lasioglossum clypeiferellum|COI-5P	A
DLII749-07|Lasioglossum CMR01|COI-5P	A
DLII338-07|Lasioglossum coactum|COI-5P	A
DLII547-07|Lasioglossum coactum|COI-5P	A
DLII318-07|Lasioglossum coactum|COI-5P	A
DLII307-07|Lasioglossum coactum|COI-5P	A
DLII051-06|Lasioglossum coactum|COI-5P	A
GBMIN20065-13|Patellapis coccinea|COI-5P|JQ266389	A
GBACU3044-13|Halictus cochlearitarsis|COI-5P|KJ836651	A
DIAL1192-08|Lasioglossum coeruleum|COI-5P	A
DIAL1193-08|Lasioglossum coeruleum|COI-5P	A
DIAL1194-08|Lasioglossum coeruleum|COI-5P	A
DIAL327-06|Lasioglossum coeruleum|COI-5P	A
DIAL328-06|Lasioglossum coeruleum|COI-5P	A
DIAL1117-07|Lasioglossum coeruleum|COI-5P	A
AUSBS166-12|Lasioglossum cognatum|COI-5P	A
AUSCL1188-12|Lasioglossum cognatum|COI-5P	A
AUSBS169-12|Lasioglossum cognatum|COI-5P	A
AUSBS167-12|Lasioglossum cognatum|COI-5P	A
NZHYM464-10|Lasioglossum cognatum|COI-5P	A
NZHYM465-10|Lasioglossum cognatum|COI-5P	A
NZHYM462-10|Lasioglossum cognatum|COI-5P	A
NZHYM463-10|Lasioglossum cognatum|COI-5P	A
NZHYM461-10|Lasioglossum cognatum|COI-5P	A
AUSCL1202-12|Lasioglossum cognatum|COI-5P	A
AUSBS165-12|Lasioglossum cognatum|COI-5P	A
AUSBS168-12|Lasioglossum cognatum|COI-5P	A
AUSCL315-12|Lasioglossum cognatum|COI-5P	A
GBAH0191-06|Lasioglossum cognatum|COI-5P|AF103953	A
DLII079-06|Lasioglossum col02|COI-5P	A
DLII581-07|Neocorynura COL02|COI-5P	A
DLII078-06|Lasioglossum col03|COI-5P	A
DLII080-06|Lasioglossum col04|COI-5P	A
DLII076-06|Lasioglossum col05|COI-5P	A
LASNA469-08|Caenohalictus COL1|COI-5P	A
LASNA374-08|Neocorynura COL1|COI-5P	A
LASNA787-08|Lasioglossum COL8|COI-5P	A
LASNA693-08|Lasioglossum COL8|COI-5P	A
BOWGF1583-10|Lasioglossum comagenense|COI-5P|HM905816	A
BOWGF1579-10|Lasioglossum comagenense|COI-5P|KF199934	A
BOWGF1581-10|Lasioglossum comagenense|COI-5P|KF199935	A
DLIII021-09|Lasioglossum comagenense|COI-5P|KF199932	A
BOWGF1577-10|Lasioglossum comagenense|COI-5P|KF199933	A
TTHYW366-08|Lasioglossum comagenense|COI-5P|KR886255	A
GBAH0220-06|Lasioglossum comagenense|COI-5P|AF103982	A
ABBOL081-15|Halictus compressus|COI-5P	A
ABBOL080-15|Halictus compressus|COI-5P	A
ABBOL082-15|Halictus compressus|COI-5P	A
DLII845-07|Lasioglossum comulum|COI-5P	A
DLII789-07|Lasioglossum comulum|COI-5P	A
DLII843-07|Lasioglossum comulum|COI-5P	A
DLII844-07|Lasioglossum comulum|COI-5P	A
DLII756-07|Lasioglossum comulum|COI-5P	A
BEECA088-06|Sphecodes confertus|COI-5P|FJ582471	A
BEECA089-06|Sphecodes confertus|COI-5P|FJ582470	A
BEECA087-06|Sphecodes confertus|COI-5P|FJ582472	A
GBMIN20020-13|Sphecodes confertus|COI-5P|JQ266479	A
GBMIN77262-17|Seladonia confusa|COI-5P|KT123221	A
GBMIN77261-17|Seladonia confusa|COI-5P|KT123220	A
MBIOF1199-13|Halictus confusus|COI-5P|KR804173	A
MBIOI1061-13|Halictus confusus|COI-5P|KR808401	A
RRINV2063-15|Halictus confusus|COI-5P|KT707436	A
UPOLB069-09|Halictus confusus|COI-5P	A
UPOLB314-09|Halictus confusus|COI-5P	A
UPOLB355-09|Halictus confusus|COI-5P	A
UPOLB351-09|Halictus confusus|COI-5P	A
UPOLL073-09|Halictus confusus|COI-5P	A
CNWBG1084-13|Halictus confusus|COI-5P|KR797651	A
UPOLL397-09|Halictus confusus|COI-5P	A
UPOLB311-09|Halictus confusus|COI-5P	A
UPOLB142-09|Halictus confusus|COI-5P	A
UPOLL096-09|Halictus confusus|COI-5P	A
UPOLL653-09|Halictus confusus|COI-5P	A
BBHYI347-10|Halictus confusus|COI-5P|JN292400	A
TTHYW419-08|Halictus confusus|COI-5P|KR874978	A
BEECB050-07|Halictus confusus|COI-5P	A
UPOLB356-09|Halictus confusus|COI-5P	A
UPOLL824-09|Halictus confusus|COI-5P	A
UPOLL132-09|Halictus confusus|COI-5P	A
BUSA184-05|Halictus confusus|COI-5P	A
UPOLL687-09|Halictus confusus|COI-5P	A
UPOLL817-09|Halictus confusus|COI-5P	A
UPOLB688-09|Halictus confusus|COI-5P	A
BEECB049-07|Halictus confusus|COI-5P	A
UPOLL198-09|Halictus confusus|COI-5P	A
UPOLB532-09|Halictus confusus|COI-5P	A
UPOLL737-09|Halictus confusus|COI-5P	A
UPOLB828-09|Halictus confusus|COI-5P	A
UPOLB518-09|Halictus confusus|COI-5P	A
BBHEC552-09|Halictus confusus|COI-5P|HM414236	A
UPOLL144-09|Halictus confusus|COI-5P	A
UPOLL064-09|Halictus confusus|COI-5P	A
BEECB1074-07|Halictus confusus|COI-5P	A
BBHYN052-10|Halictus confusus|COI-5P|JN294292	A
BUSA186-05|Halictus confusus|COI-5P	A
TTHYW1057-09|Halictus confusus|COI-5P|HM432877	A
BEECB1075-07|Halictus confusus|COI-5P	A
BUSA183-05|Halictus confusus|COI-5P	A
BBHYN234-10|Halictus confusus|COI-5P|KR808810	A
BEECB052-07|Halictus confusus|COI-5P	A
BEECB053-07|Halictus confusus|COI-5P	A
BEECB054-07|Halictus confusus|COI-5P	A
UPOLB363-09|Halictus confusus|COI-5P	A
UPOLL261-09|Halictus confusus|COI-5P	A
UPOLL067-09|Halictus confusus|COI-5P	A
ASGLE401-10|Halictus confusus|COI-5P|JN289031	A
UPOLB120-09|Halictus confusus|COI-5P	A
UPOLL684-09|Halictus confusus|COI-5P	A
UPOLB143-09|Halictus confusus|COI-5P	A
UPOLL022-09|Halictus confusus|COI-5P	A
BEECB074-07|Halictus confusus|COI-5P	A
UPOLL231-09|Halictus confusus|COI-5P	A
UPOLB360-09|Halictus confusus|COI-5P	A
UPOLB030-09|Halictus confusus|COI-5P	A
UPOLB362-09|Halictus confusus|COI-5P	A
BEECB055-07|Halictus confusus|COI-5P	A
SSGLA002-15|Halictus confusus|COI-5P|MF902380	A
SSGLA3485-15|Halictus confusus|COI-5P|MF906052	A
SSGLA5022-15|Halictus confusus|COI-5P|MF902952	A
RRSSC1917-15|Halictus confusus|COI-5P|MG336358	A
SSGLA007-15|Halictus confusus|COI-5P|MF904927	A
RRSSC5031-15|Halictus confusus|COI-5P|MG344317	A
SSGLA3483-15|Halictus confusus|COI-5P|MF906766	A
SSGLA1774-15|Halictus confusus|COI-5P|MF906330	A
SSGLA1777-15|Halictus confusus|COI-5P|MF905605	A
SSGLA2944-15|Halictus confusus|COI-5P|MF902663	A
MBIOJ687-13|Halictus confusus|COI-5P|KR803258	A
CRHII012-16|Halictus confusus|COI-5P|MG343704	A
SSGLA1998-15|Halictus confusus|COI-5P|MF902948	A
SSGLA3488-15|Halictus confusus|COI-5P|MF906583	A
CNGSF2725-15|Halictus confusus|COI-5P|MF900901	A
SSGLA5010-15|Halictus confusus|COI-5P|MF899214	A
SSGLA5009-15|Halictus confusus|COI-5P|MF904373	A
CRHII252-16|Halictus confusus|COI-5P|MG339409	A
BUSA181-05|Halictus confusus|COI-5P	A
CRHII253-16|Halictus confusus|COI-5P|MG337563	A
SSGLA7163-15|Halictus confusus|COI-5P|MF901802	A
MBIOG280-13|Halictus confusus|COI-5P|KR799926	A
BEEMH199-06|Halictus confusus|COI-5P|MG339622	A
BEEMH217-06|Halictus confusus|COI-5P|MG342207	A
BEEMH194-06|Halictus confusus|COI-5P|MG344118	A
CRHII251-16|Halictus confusus|COI-5P|MG334926	A
UPOLB617-09|Halictus confusus|COI-5P	A
JSHYN371-11|Halictus confusus|COI-5P|KR801540	A
JSHYO475-11|Halictus confusus|COI-5P|KR784356	A
DIAL262-06|Halictus confusus|COI-5P	A
UPOLB312-09|Halictus confusus|COI-5P	A
UPOLL577-09|Halictus confusus|COI-5P	A
UPOLL681-09|Halictus confusus|COI-5P	A
UPOLL180-09|Halictus confusus|COI-5P	A
JSHYO615-11|Halictus confusus|COI-5P|KR790595	A
JSHYO645-11|Halictus confusus|COI-5P|KR801593	A
UPOLL451-09|Halictus confusus|COI-5P	A
UPOLB173-09|Halictus confusus|COI-5P	A
BUSA187-05|Halictus confusus|COI-5P	A
UPOLL011-09|Halictus confusus|COI-5P	A
UPOLL174-09|Halictus confusus|COI-5P	A
UPOLL629-09|Halictus confusus|COI-5P	A
UPOLB090-09|Halictus confusus|COI-5P	A
JSAUG472-11|Halictus confusus|COI-5P|KR788864	A
UPOLL427-09|Halictus confusus|COI-5P	A
UPOLL151-09|Halictus confusus|COI-5P	A
UPOLL152-09|Halictus confusus|COI-5P	A
UPOLL153-09|Halictus confusus|COI-5P	A
UPOLB091-09|Halictus confusus|COI-5P	A
JSHYP120-11|Halictus confusus|COI-5P|KR805387	A
UPOLL409-09|Halictus confusus|COI-5P	A
UPOLB146-09|Halictus confusus|COI-5P	A
UPOLL512-09|Halictus confusus|COI-5P	A
UPOLB757-09|Halictus confusus|COI-5P	A
JSHYO467-11|Halictus confusus|COI-5P|KR796448	A
UPOLB310-09|Halictus confusus|COI-5P	A
UPOLB795-09|Halictus confusus|COI-5P	A
UPOLB459-09|Halictus confusus|COI-5P	A
JSHYN670-11|Halictus confusus|COI-5P|KR789699	A
UPOLL157-09|Halictus confusus|COI-5P	A
UPOLL855-09|Halictus confusus|COI-5P	A
BEECB071-07|Halictus confusus|COI-5P	A
UPOLL738-09|Halictus confusus|COI-5P	A
UPOLL691-09|Halictus confusus|COI-5P	A
UPOLB170-09|Halictus confusus|COI-5P	A
UPOLL886-09|Halictus confusus|COI-5P	A
UPOLL513-09|Halictus confusus|COI-5P	A
UPOLL806-09|Halictus confusus|COI-5P	A
UPOLB313-09|Halictus confusus|COI-5P	A
UPOLL902-09|Halictus confusus|COI-5P	A
UPOLL216-09|Halictus confusus|COI-5P	A
UPOLB705-09|Halictus confusus|COI-5P	A
UPOLL747-09|Halictus confusus|COI-5P	A
DIAL134-06|Halictus confusus|COI-5P	A
UPOLL932-09|Halictus confusus|COI-5P	A
OPPOC655-17|Halictus confusus|COI-5P	A
UPOLB260-09|Halictus confusus|COI-5P	A
UPOLL641-09|Halictus confusus|COI-5P	A
UPOLL642-09|Halictus confusus|COI-5P	A
UPOLL862-09|Halictus confusus|COI-5P	A
UPOLL568-09|Halictus confusus|COI-5P	A
ERPIR218-12|Halictus confusus|COI-5P|KR795954	A
ASGCB131-13|Halictus confusus|COI-5P	A
UPOLL938-09|Halictus confusus|COI-5P	A
UPOLB704-09|Halictus confusus|COI-5P	A
UPOLL422-09|Halictus confusus|COI-5P	A
UPOLL515-09|Halictus confusus|COI-5P	A
BEECB051-07|Halictus confusus|COI-5P	A
UPOLB181-09|Halictus confusus|COI-5P	A
UPOLL686-09|Halictus confusus|COI-5P	A
UPOLL385-09|Halictus confusus|COI-5P	A
UPOLL217-09|Halictus confusus|COI-5P	A
UPOLB496-09|Halictus confusus|COI-5P	A
UPOLL556-09|Halictus confusus|COI-5P	A
UPOLB332-09|Halictus confusus|COI-5P	A
ASGLE1011-10|Halictus confusus|COI-5P|JN288379	A
UPOLL791-09|Halictus confusus|COI-5P	A
BEECB073-07|Halictus confusus|COI-5P	A
UPOLL801-09|Halictus confusus|COI-5P	A
UPOLL850-09|Halictus confusus|COI-5P	A
UPOLL251-09|Halictus confusus|COI-5P	A
UPOLB085-09|Halictus confusus|COI-5P	A
UPOLL117-09|Halictus confusus|COI-5P	A
UPOLB070-09|Halictus confusus|COI-5P	A
UPOLL414-09|Halictus confusus|COI-5P	A
UPOLL172-09|Halictus confusus|COI-5P	A
UPOLL035-09|Halictus confusus|COI-5P	A
RRINV1943-15|Halictus confusus|COI-5P|KT706461	A
UPOLL825-09|Halictus confusus|COI-5P	A
UPOLL029-09|Halictus confusus|COI-5P	A
RRINV810-15|Halictus confusus|COI-5P|KT708329	A
UPOLL511-09|Halictus confusus|COI-5P	A
UPOLL384-09|Halictus confusus|COI-5P	A
UPOLL074-09|Halictus confusus|COI-5P	A
UPOLB209-09|Halictus confusus|COI-5P	A
UPOLL748-09|Halictus confusus|COI-5P	A
UPOLB373-09|Halictus confusus|COI-5P	A
RRINV813-15|Halictus confusus|COI-5P|KT706967	A
MBIOE1314-13|Halictus confusus|COI-5P|KR803216	A
UPOLL098-09|Halictus confusus|COI-5P	A
UPOLL206-09|Halictus confusus|COI-5P	A
PHMAL363-10|Halictus confusus|COI-5P|KR896852	A
MBIOI111-13|Halictus confusus|COI-5P|KR803681	A
MBIOE1860-13|Halictus confusus|COI-5P|KR792349	A
MBIOH642-13|Halictus confusus|COI-5P|KR801053	A
CNGBJ1938-14|Halictus confusus|COI-5P|KR415368	A
AGAKJ181-17|Halictus confusus|COI-5P|MG344010	A
MBIOI125-13|Halictus confusus|COI-5P|KR804388	A
MBIOI1067-13|Halictus confusus|COI-5P|KR808177	A
MBIOI112-13|Halictus confusus|COI-5P|KR785629	A
CNTIF2408-15|Halictus confusus|COI-5P|MF902618	A
CRHIA628-16|Halictus confusus|COI-5P|MG342783	A
CRHIB009-15|Halictus confusus|COI-5P|MG343926	A
RRSSC6342-15|Halictus confusus|COI-5P|MG340117	A
BARSJ319-16|Halictus confusus|COI-5P	A
UPOLL220-09|Halictus confusus|COI-5P	A
UPOLL048-09|Halictus confusus|COI-5P	A
BEEMH188-06|Halictus confusus|COI-5P|MG342799	A
BEEMH196-06|Halictus confusus|COI-5P|MG342251	A
BEEMH045-06|Halictus confusus|COI-5P|MG335023	A
BEEMH207-06|Halictus confusus|COI-5P|MG343580	A
BEEMH195-06|Halictus confusus|COI-5P|MG339332	A
BEEMH197-06|Halictus confusus|COI-5P|MG343698	A
UPOLC037-09|Halictus confusus|COI-5P	A
UPOLL655-09|Halictus confusus|COI-5P	A
UPOLL032-09|Halictus confusus|COI-5P	A
UPOLL071-09|Halictus confusus|COI-5P	A
UPOLL024-09|Halictus confusus|COI-5P	A
MBIOI1070-13|Halictus confusus|COI-5P|KR796388	A
BUSA185-05|Halictus confusus|COI-5P	A
UPOLL631-09|Halictus confusus|COI-5P	A
UPOLL150-09|Halictus confusus|COI-5P	A
UPOLL633-09|Halictus confusus|COI-5P	A
UPOLL258-09|Halictus confusus|COI-5P	A
UPOLL072-09|Halictus confusus|COI-5P	A
UPOLL415-09|Halictus confusus|COI-5P	A
UPOLL138-09|Halictus confusus|COI-5P	A
PREXP233-14|Halictus confusus|COI-5P|KR891663	A
UPOLL792-09|Halictus confusus|COI-5P	A
BBHEC211-09|Halictus confusus|COI-5P|HM435861	A
UPOLL158-09|Halictus confusus|COI-5P	A
UPOLL060-09|Halictus confusus|COI-5P	A
UPOLB689-09|Halictus confusus|COI-5P	A
UPOLL751-09|Halictus confusus|COI-5P	A
HCBNS059-03|Halictus confusus|COI-5P|FJ582224	A
UPOLL937-09|Halictus confusus|COI-5P	A
BEECB072-07|Halictus confusus|COI-5P	A
HCBNS057-03|Halictus confusus|COI-5P|FJ582222	A
HCBNS055-03|Halictus confusus|COI-5P|FJ582221	A
HCBNS058-03|Halictus confusus|COI-5P|FJ582223	A
HCBNS212-03|Halictus confusus|COI-5P|FJ582220	A
UPOLL634-09|Halictus confusus|COI-5P	A
UPOLL195-09|Halictus confusus|COI-5P	A
UPOLL023-09|Halictus confusus|COI-5P	A
SSGLA003-15|Halictus confusus|COI-5P|MF907502	A
SSWLE2300-13|Halictus confusus|COI-5P|KR884692	A
BBHYJ588-10|Halictus confusus|COI-5P|JF864420	A
DIAL318-06|Halictus confusus|COI-5P	A
BBHYL371-10|Halictus confusus|COI-5P|JN293807	A
CNJAD2581-12|Halictus confusus|COI-5P|KR793112	A
SSWLE2299-13|Halictus confusus|COI-5P|KR876892	A
SSWLE2304-13|Halictus confusus|COI-5P|KR879617	A
SSWLE2297-13|Halictus confusus|COI-5P|KR895065	A
FBAPD599-11|Halictus confusus|COI-5P|KJ839065	A
GBACU2422-13|Halictus confusus|COI-5P|KJ838857	A
GBACU1431-12|Halictus confusus|COI-5P|KJ837525	A
GBACU1247-12|Halictus confusus|COI-5P|KJ836457	A
GBACU1251-12|Halictus confusus|COI-5P|KJ838584	A
GBACU1254-12|Halictus confusus|COI-5P|KJ838014	A
FBAPD597-11|Halictus confusus|COI-5P|KJ838373	A
GBCHA1090-13|Halictus confusus|COI-5P|KJ838714	A
FBACB705-11|Halictus confusus|COI-5P|KJ837661	A
GBACU1248-12|Halictus confusus|COI-5P|KJ837329	A
GBACU1245-12|Halictus confusus|COI-5P|KJ838037	A
GBACU2423-13|Halictus confusus|COI-5P|KJ839330	A
GBCHA1091-13|Halictus confusus|COI-5P|KJ836435	A
GBCHA1092-13|Halictus confusus|COI-5P|KJ836790	A
GBMIN19993-13|Halictus confusus|COI-5P|JQ266418	A
GBAH0181-06|Halictus confusus|COI-5P|AF102837	A
GBAH0463-06|Halictus confusus|COI-5P|AF438423	A
GBMIN20019-13|Thrinchostoma conjugens|COI-5P|JQ266481	A
BWTWO113-09|Lasioglossum connexum|COI-5P|GU708265	A
HYAS1346-12|Lasioglossum conspicuum|COI-5P	A
GBAH0190-06|Lasioglossum conspicuum|COI-5P|AF103952	A
FBAPC995-11|Lasioglossum convexiusculum|COI-5P|KJ837411	A
GBAH0189-06|Lasioglossum convexum|COI-5P|AF103951	A
BEECA801-07|Lasioglossum cooleyi|COI-5P	A
BEECA800-07|Lasioglossum cooleyi|COI-5P	A
BEECA802-07|Lasioglossum cooleyi|COI-5P	A
BEECA799-07|Lasioglossum cooleyi|COI-5P	A
DIAL1285-08|Lasioglossum cooleyi|COI-5P	A
DIAL008-06|Lasioglossum coreopsis|COI-5P	A
DIAL009-06|Lasioglossum coreopsis|COI-5P	A
DIAL005-06|Lasioglossum coreopsis|COI-5P	A
DIAL006-06|Lasioglossum coreopsis|COI-5P	A
DLII399-07|Lasioglossum coreopsis|COI-5P	A
DLII453-07|Lasioglossum coreopsis|COI-5P	A
DLII049-06|Lasioglossum coreopsis|COI-5P	A
DLII433-07|Lasioglossum coreopsis|COI-5P	A
DLII821-07|Lasioglossum coreopsis|COI-5P	A
BWTWO1077-10|Lasioglossum coreopsis|COI-5P|HQ558108-SUPPRESSED	A
BWTWO1079-10|Lasioglossum coreopsis|COI-5P|HQ558109-SUPPRESSED	A
DIAL1041-06|Lasioglossum coreopsis|COI-5P	A
DLII825-07|Lasioglossum coreopsis|COI-5P|JF903503	A
DLII464-07|Lasioglossum coreopsis|COI-5P	A
DLII1344-08|Lasioglossum coreopsis|COI-5P	A
DIAL007-06|Lasioglossum coreopsis|COI-5P	A
DLII1296-08|Lasioglossum coreopsis|COI-5P	A
LASNA042-08|Lasioglossum coreopsis|COI-5P	A
BBHYL333-10|Lasioglossum coriaceum|COI-5P|JN293774	A
UPOLB217-09|Lasioglossum coriaceum|COI-5P	A
TDWGB039-10|Lasioglossum coriaceum|COI-5P|JN272465	A
UPOLB215-09|Lasioglossum coriaceum|COI-5P	A
UPOLB787-09|Lasioglossum coriaceum|COI-5P	A
TTMHY285-08|Lasioglossum coriaceum|COI-5P|KR873519	A
UPOLB230-09|Lasioglossum coriaceum|COI-5P	A
TTMHY609-11|Lasioglossum coriaceum|COI-5P|KR874536	A
OPPOC674-17|Lasioglossum coriaceum|COI-5P	A
DIAL190-06|Lasioglossum coriaceum|COI-5P	A
DIAL084-06|Lasioglossum coriaceum|COI-5P	A
DIAL061-06|Lasioglossum coriaceum|COI-5P	A
DIAL060-06|Lasioglossum coriaceum|COI-5P	A
OPPQA076-17|Lasioglossum coriaceum|COI-5P	A
DLII1172-08|Lasioglossum coriaceum|COI-5P|FJ864305	A
DIAL062-06|Lasioglossum coriaceum|COI-5P	A
RRMFD547-15|Lasioglossum coriaceum|COI-5P|KT621505	A
HCBNS060-03|Lasioglossum coriaceum|COI-5P|FJ582271	A
HCBNS061-03|Lasioglossum coriaceum|COI-5P|FJ582272	A
MBIOI1073-13|Lasioglossum coriaceum|COI-5P|KR806575	A
MBIOH426-13|Lasioglossum coriaceum|COI-5P|KR795905	A
RBINA5457-13|Lasioglossum coriaceum|COI-5P|KR889536	A
CNLMA539-14|Lasioglossum coriaceum|COI-5P|KR410127	A
RBINA936-13|Lasioglossum coriaceum|COI-5P|KR887665	A
SMTPO295-15|Lasioglossum coriaceum|COI-5P|MG334654	A
MBIOE1317-13|Lasioglossum coriaceum|COI-5P|KR794999	A
CNTIH2212-15|Lasioglossum coriaceum|COI-5P|MF908077	A
RRSSC4844-15|Lasioglossum coriaceum|COI-5P|MG340330	A
DIAL271-06|Lasioglossum coriaceum|COI-5P	A
BEEMH145-06|Lasioglossum coriaceum|COI-5P|MG334732	A
BEEMH115-06|Lasioglossum coriaceum|COI-5P|MG343457	A
MBIOD085-13|Lasioglossum coriaceum|COI-5P|KR798416	A
MBIOD084-13|Lasioglossum coriaceum|COI-5P|KR792865	A
GMGSI387-12|Lasioglossum coriaceum|COI-5P	A
MBIOH424-13|Lasioglossum coriaceum|COI-5P|KR807992	A
RBINA5458-13|Lasioglossum coriaceum|COI-5P|KR894129	A
UPOLB443-09|Lasioglossum coriaceum|COI-5P	A
GBAH0240-06|Lasioglossum coriaceum|COI-5P|AF104645	A
BOFTW569-10|Corynura corinogaster|COI-5P|HQ937190	A
BOTWC772-10|Corynura corinogaster|COI-5P|KU983368	A
HALIC328-12|Corynura corinogaster|COI-5P|KU983369	A
BEECA092-06|Sphecodes coronus|COI-5P|FJ582464	A
BEECA090-06|Sphecodes coronus|COI-5P|FJ582474	A
BEECA099-06|Sphecodes coronus|COI-5P|FJ582463	A
BEECA086-06|Sphecodes coronus|COI-5P|FJ582466	A
BEECA091-06|Sphecodes coronus|COI-5P|FJ582473	A
BEECB1047-07|Sphecodes coronus|COI-5P|FJ582465	A
BBHYN039-10|Sphecodes coronus|COI-5P|JN294285	A
SMTPI9368-14|Sphecodes coronus|COI-5P|KR873864	A
SMTPI9378-14|Sphecodes coronus|COI-5P|KR898371	A
SMTPI9365-14|Sphecodes coronus|COI-5P|KR890694	A
DIAL1323-08|Lasioglossum costaricense|COI-5P|JF903504	A
GBACU1097-12|Lasioglossum costulatum|COI-5P|KJ837086	A
GBCHA009-13|Lasioglossum costulatum|COI-5P|KJ836497	A
GBACU2435-13|Lasioglossum costulatum|COI-5P|KJ839413	A
FBACB692-11|Lasioglossum costulatum|COI-5P|KJ839169	A
GBACU2436-13|Lasioglossum costulatum|COI-5P|KJ837759	A
FBAPC388-10|Lasioglossum costulatum|COI-5P|KJ839709	A
GBCHA007-13|Lasioglossum costulatum|COI-5P|KJ839488	A
FBACB694-11|Lasioglossum costulatum|COI-5P|KJ837937	A
FBACB691-11|Lasioglossum costulatum|COI-5P|KJ837357	A
GBACU2437-13|Lasioglossum costulatum|COI-5P|KJ839248	A
GBACU1098-12|Lasioglossum costulatum|COI-5P|KJ838387	A
FBACB693-11|Lasioglossum costulatum|COI-5P|KJ836759	A
GBCHA008-13|Lasioglossum costulatum|COI-5P|KJ838072	A
FBAPC389-10|Lasioglossum costulatum|COI-5P|KJ839220	A
GMGMD182-14|Lasioglossum costulatum|COI-5P	A
FBAPB377-09|Lasioglossum costulatum|COI-5P|HM401100	A
ABBOL152-15|Lasioglossum costulatum|COI-5P	A
GBACU3068-13|Sphecodes crassanus|COI-5P|KJ838632	A
FBAPB073-09|Sphecodes crassus|COI-5P|HM401030	A
GBCHA966-13|Sphecodes crassus|COI-5P|KJ838311	A
GBACU3675-13|Sphecodes crassus|COI-5P|KJ837676	A
GBACU3674-13|Sphecodes crassus|COI-5P|KJ839078	A
GBACU3676-13|Sphecodes crassus|COI-5P|KJ838170	A
GBACU085-12|Sphecodes crassus|COI-5P|KJ837500	A
GBACU2376-13|Sphecodes crassus|COI-5P|KJ838468	A
FBAPD195-11|Sphecodes crassus|COI-5P|KJ839769	A
FBHAP616-09|Sphecodes crassus|COI-5P|GU705945	A
FBAPD191-11|Sphecodes crassus|COI-5P|KJ838489	A
CJP024-14|Sphecodes crassus|COI-5P	A
FBAPD194-11|Sphecodes crassus|COI-5P|KJ839734	A
ABEE232-17|Sphecodes crassus|COI-5P	A
FBAPC922-11|Sphecodes crassus|COI-5P|KJ837011	A
FBAPC856-11|Sphecodes crassus|COI-5P|KJ838982	A
FBHAP190-09|Sphecodes crassus|COI-5P|KJ839376	A
FBHAP599-09|Sphecodes crassus|COI-5P|KJ836979	A
FBHAP597-09|Sphecodes crassus|COI-5P|KJ838926	A
FBHAP596-09|Sphecodes crassus|COI-5P|KJ838436	A
FBHAP624-09|Sphecodes crassus|COI-5P|KJ837823	A
BEEEE158-15|Sphecodes crassus|COI-5P	A
FBAPB114-09|Sphecodes crassus|COI-5P|KJ836869	A
BEEEE075-15|Sphecodes crassus|COI-5P|KT074078	A
GBMIN11795-13|Sphecodes crassus|COI-5P|JX256666	A
GBMIN11835-13|Sphecodes crassus|COI-5P|JX256663	A
BEEEE337-16|Sphecodes crassus|COI-5P	A
GMGMB1473-14|Sphecodes crassus|COI-5P	A
GMGMM909-14|Sphecodes crassus|COI-5P	A
FBAPD192-11|Sphecodes crassus|COI-5P|KJ838114	A
DLII404-07|Lasioglossum creberrimum|COI-5P	A
DLII460-07|Lasioglossum creberrimum|COI-5P|JF903505	A
DLII409-07|Lasioglossum creberrimum|COI-5P	A
BOWGF433-09|Lasioglossum creberrimum|COI-5P|GU708189-SUPPRESSED	A
BBHYA3857-12|Lasioglossum creberrimum|COI-5P	A
DIAL861-06|Lasioglossum creberrimum|COI-5P	A
BOWGF944-09|Lasioglossum creberrimum|COI-5P|GU708160-SUPPRESSED	A
DIAL381-06|Lasioglossum creberrimum|COI-5P	A
DIAL380-06|Lasioglossum creberrimum|COI-5P	A
DIAL371-06|Lasioglossum creberrimum|COI-5P	A
DIAL011-06|Lasioglossum creberrimum|COI-5P	A
DIAL010-06|Lasioglossum creberrimum|COI-5P	A
DIAL1195-08|Lasioglossum creberrimum|COI-5P	A
DIAL1197-08|Lasioglossum creberrimum|COI-5P	A
DIAL1246-08|Lasioglossum creberrimum|COI-5P	A
DLII1277-08|Lasioglossum creberrimum|COI-5P	A
GBAH0464-06|Halictus crenicornis|COI-5P|AF438424	A
GBMIN20050-13|Halictus crenicornis|COI-5P|JQ266419	A
JSHYN778-11|Lasioglossum cressonii|COI-5P|KR793842	A
OPPEQ365-17|Lasioglossum cressonii|COI-5P	A
JSHYO574-11|Lasioglossum cressonii|COI-5P|KR806755	A
JSHYP203-11|Lasioglossum cressonii|COI-5P|KR800001	A
JSHYO931-11|Lasioglossum cressonii|COI-5P|KR788535	A
PHMTX893-11|Lasioglossum cressonii|COI-5P|KR887319	A
OPPOC840-17|Lasioglossum cressonii|COI-5P	A
UPOLB493-09|Lasioglossum cressonii|COI-5P	A
JSHYO647-11|Lasioglossum cressonii|COI-5P|KR807945	A
JSHYM146-11|Lasioglossum cressonii|COI-5P|KR797623	A
UPOLB175-09|Lasioglossum cressonii|COI-5P	A
OPPQA101-17|Lasioglossum cressonii|COI-5P	A
BBHYE420-10|Lasioglossum cressonii|COI-5P|HQ552365	A
DIAL519-06|Lasioglossum cressonii|COI-5P	A
BBHYE417-10|Lasioglossum cressonii|COI-5P|HQ552364	A
BBHEC099-09|Lasioglossum cressonii|COI-5P|GU690105	A
OPPEM3155-17|Lasioglossum cressonii|COI-5P	A
OPPOA359-17|Lasioglossum cressonii|COI-5P	A
OPPOA783-17|Lasioglossum cressonii|COI-5P	A
JSHYM777-11|Lasioglossum cressonii|COI-5P|KR784588	A
BBHYK894-10|Lasioglossum cressonii|COI-5P|JF864827	A
BBHYJ618-10|Lasioglossum cressonii|COI-5P|JF864449	A
NCCC580-11|Lasioglossum cressonii|COI-5P|KR783476	A
OPPEG2517-17|Lasioglossum cressonii|COI-5P	A
JSHYM513-11|Lasioglossum cressonii|COI-5P|KR805113	A
OPPEE4159-17|Lasioglossum cressonii|COI-5P	A
OPPUM1348-17|Lasioglossum cressonii|COI-5P	A
JSHYM134-11|Lasioglossum cressonii|COI-5P|KR787722	A
OPPQC248-17|Lasioglossum cressonii|COI-5P	A
DIAL172-06|Lasioglossum cressonii|COI-5P	A
OPPOC493-17|Lasioglossum cressonii|COI-5P	A
OPPOI143-17|Lasioglossum cressonii|COI-5P	A
UPOLL519-09|Lasioglossum cressonii|COI-5P	A
JSHYO178-11|Lasioglossum cressonii|COI-5P|KR795244	A
OPPOC524-17|Lasioglossum cressonii|COI-5P	A
JSHYO577-11|Lasioglossum cressonii|COI-5P|KR791162	A
OPPQA071-17|Lasioglossum cressonii|COI-5P	A
BBHYJ464-10|Lasioglossum cressonii|COI-5P|JN293055	A
OPPOI179-17|Lasioglossum cressonii|COI-5P	A
OPPQM2471-17|Lasioglossum cressonii|COI-5P	A
OPPOC492-17|Lasioglossum cressonii|COI-5P	A
JSHYM206-11|Lasioglossum cressonii|COI-5P|KR808282	A
PHJUN3263-11|Lasioglossum cressonii|COI-5P|KR893470	A
ASGLE1097-10|Lasioglossum cressonii|COI-5P|JN288460	A
DIAL1009-06|Lasioglossum cressonii|COI-5P	A
OPPFM639-17|Lasioglossum cressonii|COI-5P	A
OPPFM609-17|Lasioglossum cressonii|COI-5P	A
OPPQM113-17|Lasioglossum cressonii|COI-5P	A
OPPOG337-17|Lasioglossum cressonii|COI-5P	A
BOWGF1886-10|Lasioglossum cressonii|COI-5P|HQ557881-SUPPRESSED	A
DLII1016-07|Lasioglossum cressonii|COI-5P	A
BBHYF130-10|Lasioglossum cressonii|COI-5P|HQ552524	A
OPPCC3209-17|Lasioglossum cressonii|COI-5P	A
CNROL057-13|Lasioglossum cressonii|COI-5P|KR421688	A
BBHYK896-10|Lasioglossum cressonii|COI-5P|JF864829	A
DIAL1008-06|Lasioglossum cressonii|COI-5P|JF903506	A
HPPPF1074-13|Lasioglossum cressonii|COI-5P|KR808410	A
PAMAY641-12|Lasioglossum cressonii|COI-5P|KR875736	A
DIAL1006-06|Lasioglossum cressonii|COI-5P	A
SSROC017-14|Lasioglossum cressonii|COI-5P|KR876726	A
CNRMC1130-12|Lasioglossum cressonii|COI-5P|KR804973	A
HPPPH1016-13|Lasioglossum cressonii|COI-5P|KR797529	A
DIAL1339-08|Lasioglossum cressonii|COI-5P	A
SMTPB6037-13|Lasioglossum cressonii|COI-5P|KR877130	A
CNROL058-13|Lasioglossum cressonii|COI-5P|KR408035	A
BEEMH165-06|Lasioglossum cressonii|COI-5P|MG335420	A
BEEMH247-06|Lasioglossum cressonii|COI-5P|MG341322	A
BEEMH144-06|Lasioglossum cressonii|COI-5P|MG338240	A
BEEMH160-06|Lasioglossum cressonii|COI-5P|MG338006	A
BEEMH161-06|Lasioglossum cressonii|COI-5P|MG344366	A
BEEMH135-06|Lasioglossum cressonii|COI-5P|MG343414	A
CNROK1315-13|Lasioglossum cressonii|COI-5P|KR416028	A
HPPPD1702-13|Lasioglossum cressonii|COI-5P|KR791272	A
CNKJK1649-14|Lasioglossum cressonii|COI-5P|KR413865	A
RRSSC4117-15|Lasioglossum cressonii|COI-5P|MG342959	A
MBIOE1321-13|Lasioglossum cressonii|COI-5P|KR789654	A
CNRGA099-15|Lasioglossum cressonii|COI-5P|MF899206	A
SSROC4983-15|Lasioglossum cressonii|COI-5P|MF907681	A
SSROC3988-15|Lasioglossum cressonii|COI-5P|MF903059	A
CNRGQ032-15|Lasioglossum cressonii|COI-5P|MF898826	A
SSROC5003-15|Lasioglossum cressonii|COI-5P|MF907349	A
CNTIB132-15|Lasioglossum cressonii|COI-5P|MF905428	A
GMOAG226-15|Lasioglossum cressonii|COI-5P|MG334812	A
CNRGA098-15|Lasioglossum cressonii|COI-5P|MF907814	A
SSROC3979-15|Lasioglossum cressonii|COI-5P|MF903562	A
SSROB4628-14|Lasioglossum cressonii|COI-5P|KR885567	A
SSROB3529-14|Lasioglossum cressonii|COI-5P|KR897757	A
SSROB3576-14|Lasioglossum cressonii|COI-5P|KR880709	A
CNTID4332-15|Lasioglossum cressonii|COI-5P|MF906588	A
CNROT460-13|Lasioglossum cressonii|COI-5P|KR412256	A
GMOAG228-15|Lasioglossum cressonii|COI-5P|MG337530	A
SSROC6792-15|Lasioglossum cressonii|COI-5P|MF903483	A
SSROC6786-15|Lasioglossum cressonii|COI-5P|MF906442	A
SSROC6757-15|Lasioglossum cressonii|COI-5P|MF899917	A
SSROC6788-15|Lasioglossum cressonii|COI-5P|MF905963	A
CNROT462-13|Lasioglossum cressonii|COI-5P|KR403143	A
RRMFI4260-15|Lasioglossum cressonii|COI-5P|MG336695	A
CNROT461-13|Lasioglossum cressonii|COI-5P|KR406324	A
SMTPJ1181-14|Lasioglossum cressonii|COI-5P|KR892970	A
SMTPJ1185-14|Lasioglossum cressonii|COI-5P|KR902147	A
CNRVG059-15|Lasioglossum cressonii|COI-5P|MF908234	A
SMTPM4849-15|Lasioglossum cressonii|COI-5P|MG341249	A
GMOPK221-15|Lasioglossum cressonii|COI-5P|MG337006	A
SSROC6798-15|Lasioglossum cressonii|COI-5P|MF906600	A
SSROC6774-15|Lasioglossum cressonii|COI-5P|MF905603	A
SSROC3997-15|Lasioglossum cressonii|COI-5P|MF903759	A
SSROC4990-15|Lasioglossum cressonii|COI-5P|MF905599	A
CNTIH1998-15|Lasioglossum cressonii|COI-5P|MF906415	A
SSROB1014-14|Lasioglossum cressonii|COI-5P|KR893917	A
SSROC4306-15|Lasioglossum cressonii|COI-5P|MF903675	A
CNROK1312-13|Lasioglossum cressonii|COI-5P|KR419461	A
CNGBF1337-14|Lasioglossum cressonii|COI-5P|KR405128	A
SSROC6775-15|Lasioglossum cressonii|COI-5P|MF901642	A
MBIOD087-13|Lasioglossum cressonii|COI-5P|KR785114	A
DLII373-07|Lasioglossum cressonii|COI-5P	A
DLII371-07|Lasioglossum cressonii|COI-5P	A
DLII351-07|Lasioglossum cressonii|COI-5P	A
JSHYM261-11|Lasioglossum cressonii|COI-5P|KR783937	A
DLII639-07|Lasioglossum cressonii|COI-5P	A
DLII661-07|Lasioglossum cressonii|COI-5P	A
JSHYM208-11|Lasioglossum cressonii|COI-5P|KR803249	A
HDBNS172-04|Lasioglossum cressonii|COI-5P|FJ582274	A
DIAL171-06|Lasioglossum cressonii|COI-5P	A
DIAL173-06|Lasioglossum cressonii|COI-5P	A
HDBNS173-04|Lasioglossum cressonii|COI-5P|FJ582273	A
DLII1025-07|Lasioglossum cressonii|COI-5P	A
SSROC5320-15|Lasioglossum cressonii|COI-5P|MF907960	A
DIAL426-06|Lasioglossum cressonii|COI-5P	A
HPPPD261-13|Lasioglossum cressonii|COI-5P|KR804233	A
HPPPD1735-13|Lasioglossum cressonii|COI-5P|KR798787	A
HPPPD1734-13|Lasioglossum cressonii|COI-5P|KR786883	A
CNSLR354-13|Lasioglossum cressonii|COI-5P|KR784511	A
DLII1237-08|Lasioglossum cressonii|COI-5P	A
DIAL425-06|Lasioglossum cressonii|COI-5P	A
CNROK1313-13|Lasioglossum cressonii|COI-5P|KR402431	A
DIAL330-06|Lasioglossum cressonii|COI-5P	A
DIAL331-06|Lasioglossum cressonii|COI-5P	A
HDBNS174-04|Lasioglossum cressonii|COI-5P|FJ582275	A
BWTWO1069-10|Lasioglossum cressonii|COI-5P|HQ558103-SUPPRESSED	A
MBIOI1077-13|Lasioglossum cressonii|COI-5P|KR799968	A
OPPWC1670-17|Lasioglossum cressonii|COI-5P	A
OPPWE5902-17|Lasioglossum cressonii|COI-5P	A
OPPUM2373-17|Lasioglossum cressonii|COI-5P	A
OPPQM2517-17|Lasioglossum cressonii|COI-5P	A
OPPQM2467-17|Lasioglossum cressonii|COI-5P	A
OPPQM2463-17|Lasioglossum cressonii|COI-5P	A
DLII1688-09|Lasioglossum cressonii|COI-5P	A
OPPQM2465-17|Lasioglossum cressonii|COI-5P	A
DIAL933-06|Lasioglossum cressonii|COI-5P	A
OPPQM2483-17|Lasioglossum cressonii|COI-5P	A
TTMHY605-11|Lasioglossum cressonii|COI-5P|KR879460	A
GMOEF255-15|Lasioglossum cressonii|COI-5P|MG343397	A
DIAL609-06|Lasioglossum cressonii|COI-5P	A
OPPQM128-17|Lasioglossum cressonii|COI-5P	A
OPPQM2495-17|Lasioglossum cressonii|COI-5P	A
JSHYM239-11|Lasioglossum cressonii|COI-5P|MG339442	A
DIAL068-06|Lasioglossum cressonii|COI-5P	A
GMGAA055-13|Lasioglossum cressonii|COI-5P	A
DIAL329-06|Lasioglossum cressonii|COI-5P	A
DIAL043-06|Lasioglossum cressonii|COI-5P	A
DIAL1061-06|Lasioglossum cressonii|COI-5P	A
SMTPM038-15|Lasioglossum cressonii|COI-5P|MG338703	A
DIAL1056-06|Lasioglossum cressonii|COI-5P	A
DIAL717-06|Lasioglossum cressonii|COI-5P	A
HYMBB300-09|Lasioglossum cressonii|COI-5P	A
GBAH0201-06|Lasioglossum cressonii|COI-5P|AF103963	A
BEECC456-08|Sphecodes cressonii|COI-5P	A
BEECC457-08|Sphecodes cressonii|COI-5P	A
BEECA093-06|Sphecodes cressonii|COI-5P|FJ582476	A
BEECB1048-07|Sphecodes cressonii|COI-5P|FJ582477	A
BEECA094-06|Sphecodes cressonii|COI-5P|FJ582475	A
BEECA079-06|Sphecodes cressonii|COI-5P|FJ582478	A
FBAPC446-10|Halictus cretellus|COI-5P|KJ839319	A
DLII1394-08|Lasioglossum CRI-02|COI-5P	A
DIAL1325-08|Lasioglossum CRI-04|COI-5P	A
DIAL1328-08|Lasioglossum CRI-04|COI-5P	A
ABEE080-17|Sphecodes cristatus|COI-5P	A
GBMIN11834-13|Sphecodes cristatus|COI-5P|JX256667	A
LASNA082-08|Lasioglossum cristula|COI-5P	A
GBCHA571-13|Sphecodes croaticus|COI-5P|KJ836415	A
FBAPB115-09|Sphecodes croaticus|COI-5P|KJ838190	A
FBAPC594-11|Sphecodes croaticus|COI-5P|KJ837235	A
GBACU086-12|Sphecodes croaticus|COI-5P|KJ836647	A
GBACU854-12|Sphecodes croaticus|COI-5P|KJ839600	A
GBACU853-12|Sphecodes croaticus|COI-5P|KJ837646	A
GBACU855-12|Sphecodes croaticus|COI-5P|KJ836433	A
BOFTW147-08|Rhinocorynura crotonis|COI-5P|KU983470	A
BOWGF120-08|Lasioglossum CtenoKEN4|COI-5P	A
LASNA635-08|Lasioglossum CtenoKEN9|COI-5P	A
BOWGF022-08|Lasioglossum CtenoNGA1|COI-5P	A
ASBEE167-08|Lasioglossum CUB-01|COI-5P|HM880980-SUPPRESSED	A
ASBEE073-08|Lasioglossum CUB-01|COI-5P|MG895397	A
ASBEE168-08|Lasioglossum CUB-02|COI-5P|MG895398	A
BEECA812-07|Augochlora CUB1|COI-5P	A
DIAL1282-08|Lasioglossum cubitale|COI-5P	A
GBAH0202-06|Lasioglossum cupreicolle|COI-5P|AF103964	A
BEECA898-07|Caenohalictus cuprellus|COI-5P	A
FBAPC1043-11|Lasioglossum cupromicans|COI-5P|KJ839690	A
FBAPC551-11|Lasioglossum cupromicans|COI-5P|KJ838229	A
FBAPC552-11|Lasioglossum cupromicans|COI-5P|KJ839309	A
FBAPC550-11|Lasioglossum cupromicans|COI-5P|KJ837001	A
IBBP128-10|Lasioglossum cupromicans|COI-5P|JQ909771	A
IBBP127-10|Lasioglossum cupromicans|COI-5P|JQ909772	A
BEEEE263-16|Lasioglossum cupromicans|COI-5P	A
FBAPD506-11|Systropha curvicornis|COI-5P|KJ836756	A
FBAPD505-11|Systropha curvicornis|COI-5P|KJ836635	A
FBAPD858-11|Systropha curvicornis|COI-5P|KJ838188	A
GBACU1409-12|Systropha curvicornis|COI-5P|KJ836819	A
DLII995-07|Lasioglossum cyaneonotum|COI-5P	A
DLII996-07|Lasioglossum cyaneonotum|COI-5P	A
DLII946-07|Lasioglossum cyaneonotum|COI-5P	A
DLII997-07|Lasioglossum cyaneonotum|COI-5P	A
DLII994-07|Lasioglossum cyaneonotum|COI-5P	A
LASNA020-08|Lasioglossum cyaneonotum|COI-5P	A
DLII993-07|Lasioglossum cyaneonotum|COI-5P	A
DLII679-07|Lasioglossum cyaneonotum|COI-5P|JF903507	A
DLII667-07|Lasioglossum cyaneonotum|COI-5P	A
DLII943-07|Lasioglossum cyaneonotum|COI-5P	A
DLII335-07|Lasioglossum cyaneonotum|COI-5P	A
DLII324-07|Lasioglossum cyaneonotum|COI-5P	A
DLII329-07|Lasioglossum cyaneonotum|COI-5P	A
DLII313-07|Lasioglossum cyaneonotum|COI-5P	A
HALIC264-12|Caenohalictus cyanopygus|COI-5P|KC617769	A
HALIC182-11|Caenohalictus cyanopygus|COI-5P|KC250741	A
HALIC265-12|Caenohalictus cyanopygus|COI-5P|KC617768	A
HALIC184-11|Caenohalictus cyanopygus|COI-5P|KC250740	A
HALIC266-12|Caenohalictus cyanopygus|COI-5P|KC617766	A
HALIC262-12|Caenohalictus cyanopygus|COI-5P|KC617765	A
HALIC185-11|Caenohalictus cyanopygus|COI-5P|KC250739	A
HALIC267-12|Caenohalictus cyanopygus|COI-5P|KC617767	A
HALIC263-12|Caenohalictus cyanopygus|COI-5P|KC617770	A
HALIC190-11|Caenohalictus cyanopygus|COI-5P|KC250743	A
HALIC183-11|Caenohalictus cyanopygus|COI-5P|KC250742	A
HYAS297-11|Homalictus dampieri|COI-5P	A
AUSBC1624-12|Homalictus dampieri|COI-5P	A
MSAPB848-11|Lasioglossum dampieri|COI-5P	A
MSAPB846-11|Lasioglossum dampieri|COI-5P	A
DIAL1369-09|Lasioglossum dashwoodi|COI-5P	A
DIAL1408-09|Lasioglossum dashwoodi|COI-5P	A
DLII1005-07|Lasioglossum dashwoodi|COI-5P|JF903508	A
DLII1027-07|Lasioglossum dashwoodi|COI-5P	A
ASBEE078-08|Lasioglossum dashwoodi|COI-5P	A
NGNAO939-14|Lasioglossum dashwoodi|COI-5P|KR901399	A
GBMIN19994-13|Lasioglossum deceptum|COI-5P|JQ266416	A
LASNA467-08|Rhinetula denticrus|COI-5P	A
GBMIN19966-13|Rhinetula denticrus|COI-5P|JQ266472	A
FBAPD493-11|Dufourea dentiventris|COI-5P|KJ838622	A
FBAPD490-11|Dufourea dentiventris|COI-5P|KJ839506	A
FBAPD492-11|Dufourea dentiventris|COI-5P|KJ837146	A
FBAPD491-11|Dufourea dentiventris|COI-5P|KJ837367	A
GBACU3258-13|Dufourea dentiventris|COI-5P|KJ836503	A
FBAPB510-09|Dufourea dentiventris|COI-5P|HM401151	A
FBHAP650-09|Dufourea dentiventris|COI-5P|KJ839566	A
FBHAP651-09|Dufourea dentiventris|COI-5P|KJ836705	A
FBHAP649-09|Dufourea dentiventris|COI-5P|KJ838981	A
DLII1173-08|Lasioglossum desertum|COI-5P	A
DLII1174-08|Lasioglossum desertum|COI-5P	A
GBAH0241-06|Lasioglossum desertum|COI-5P|AF104646	A
LASNA589-08|Lasioglossum dial12nv|COI-5P	A
LASNA494-08|Lasioglossum dial12nv|COI-5P	A
BEECB1024-07|Lasioglossum diatretum|COI-5P	A
DLII1020-07|Lasioglossum diatretum|COI-5P	A
DLII087-06|Lasioglossum diatretum|COI-5P	A
HDBNS053-03|Sphecodes dichrous|COI-5P|FJ582484	A
POC039-05|Sphecodes dichrous|COI-5P	A
BEECA095-06|Sphecodes dichrous|COI-5P|FJ582480	A
HDBNS200-04|Sphecodes dichrous|COI-5P|FJ582481	A
BEECB068-07|Sphecodes dichrous|COI-5P	A
BUSA112-05|Sphecodes dichrous|COI-5P	A
BEECA390-06|Sphecodes dichrous|COI-5P	A
BEECA096-06|Sphecodes dichrous|COI-5P|FJ582479	A
BEECB067-07|Sphecodes dichrous|COI-5P	A
HDBNS052-03|Sphecodes dichrous|COI-5P|FJ582482	A
HDBNS054-03|Sphecodes dichrous|COI-5P|FJ582483	A
GBMIN19975-13|Neocorynura discolor|COI-5P|JQ266454	A
FBAPD306-11|Lasioglossum discum fertoni|COI-5P|KJ839117	A
ABBOL153-15|Lasioglossum discum|COI-5P	A
ABBOL164-15|Lasioglossum discum|COI-5P	A
GBAH0242-06|Lasioglossum discum|COI-5P|AF104647	A
DLII1343-08|Lasioglossum disparile|COI-5P	A
DLII728-07|Lasioglossum disparile|COI-5P|JF903509	A
DLII038-06|Lasioglossum disparile|COI-5P	A
DLII059-06|Lasioglossum disparile|COI-5P	A
DLII054-06|Lasioglossum disparile|COI-5P	A
DLII041-06|Lasioglossum disparile|COI-5P	A
DLII056-06|Lasioglossum disparile|COI-5P	A
DLII1351-08|Lasioglossum disparile|COI-5P	A
DLII1292-08|Lasioglossum disparile|COI-5P	A
BOWGF949-09|Lasioglossum disparile|COI-5P	A
HYAS1011-11|Lasioglossum dissimulator|COI-5P	A
HYAS1010-11|Lasioglossum dissimulator|COI-5P	A
HALIC345-12|Ruizantheda divaricata|COI-5P|MG968429	A
UPOLL508-09|Lasioglossum divergens|COI-5P	A
UPOLL426-09|Lasioglossum divergens|COI-5P	A
UPOLL749-09|Lasioglossum divergens|COI-5P	A
UPOLL911-09|Lasioglossum divergens|COI-5P	A
HDBNS185-04|Lasioglossum divergens|COI-5P|FJ582278	A
HDBNS183-04|Lasioglossum divergens|COI-5P|FJ582279	A
HDBNS178-04|Lasioglossum divergens|COI-5P|FJ582280	A
HDBNS179-04|Lasioglossum divergens|COI-5P|FJ582281	A
HDBNS180-04|Lasioglossum divergens|COI-5P|FJ582282	A
HDBNS182-04|Lasioglossum divergens|COI-5P|FJ582283	A
HDBNS181-04|Lasioglossum divergens|COI-5P|FJ582284	A
HDBNS184-04|Lasioglossum divergens|COI-5P|FJ582285	A
GBACU3324-13|Nomia diversipes|COI-5P|KJ837536	A
GBACU3325-13|Nomia diversipes|COI-5P|KJ837964	A
ABEE211-17|Pseudapis diversipes|COI-5P	A
BEECA767-07|Agapostemon DOM1|COI-5P	A
MSAPB1211-12|Homalictus dotatus|COI-5P	A
AUSBS049-12|Homalictus dotatus|COI-5P	A
AUSBS059-12|Homalictus dotatus|COI-5P	A
AUSBS181-12|Homalictus dotatus|COI-5P	A
AUSBS016-12|Homalictus dotatus|COI-5P	A
MSAPB1227-12|Homalictus dotatus|COI-5P	A
AUSBS015-12|Homalictus dotatus|COI-5P	A
AUSBS058-12|Homalictus dotatus|COI-5P	A
AUSBS057-12|Homalictus dotatus|COI-5P	A
DLII1639-09|Lasioglossum dreisbachi|COI-5P	A
ASAHY814-13|Lasioglossum dreisbachi|COI-5P|KM996183	A
JSHYO426-11|Lasioglossum dreisbachi|COI-5P|KR783124	A
DLII1666-09|Lasioglossum dreisbachi|COI-5P	A
DLII726-07|Lasioglossum dreisbachi|COI-5P	A
DLII729-07|Lasioglossum dreisbachi|COI-5P|JF903510	A
DLII1531-09|Lasioglossum dreisbachi|COI-5P	A
LASNA009-08|Lasioglossum droegei|COI-5P|FJ864309	A
DLII1302-08|Lasioglossum droegei|COI-5P|FJ864306	A
DLII035-06|Lasioglossum droegei|COI-5P|FJ864307	A
DLII034-06|Lasioglossum droegei|COI-5P|FJ864308	A
GBAH0221-06|Lasioglossum duplex|COI-5P|AF103983	A
ABBOL122-15|Lasioglossum dybowskii|COI-5P	A
ABBOL121-15|Lasioglossum dybowskii|COI-5P	A
DLII1179-08|Lasioglossum dynastes|COI-5P	A
DLII1180-08|Lasioglossum dynastes|COI-5P	A
DIAL1109-07|Lasioglossum ebmerellum|COI-5P	A
DLII1059-07|Lasioglossum ebmerellum|COI-5P	A
DLII1158-08|Lasioglossum ebmerellum|COI-5P	A
DLII1049-07|Lasioglossum ebmerellum|COI-5P|JF903511	A
DLII921-07|Lasioglossum ebmerellum|COI-5P	A
DLII956-07|Lasioglossum ebmerellum|COI-5P	A
DLII920-07|Lasioglossum ebmerellum|COI-5P	A
DLII1198-08|Lasioglossum egregium|COI-5P	A
LASNA068-08|Lasioglossum egregium|COI-5P	A
LASNA069-08|Lasioglossum egregium|COI-5P	A
BEECB209-07|Protodufourea eickworti|COI-5P	A
BWTWO904-10|Lasioglossum ellisiae|COI-5P|HM405339-SUPPRESSED	A
BWTWO897-10|Lasioglossum ellisiae|COI-5P|HM405335-SUPPRESSED	A
BOWGF1482-10|Lasioglossum ellisiae|COI-5P|HM905750-SUPPRESSED	A
DLIII019-09|Lasioglossum ellisiae|COI-5P|GU666306-SUPPRESSED	A
DIAL356-06|Lasioglossum ellisiae|COI-5P|FJ663063	A
BWTWO902-10|Lasioglossum ellisiae|COI-5P|HM405338-SUPPRESSED	A
BBHYA1575-12|Lasioglossum ellisiae|COI-5P	A
JSHYO572-11|Lasioglossum ellisiae|COI-5P|KR797700	A
DIAL653-06|Lasioglossum ellisiae|COI-5P|FJ663061	A
DIAL654-06|Lasioglossum ellisiae|COI-5P|FJ663062	A
BWTWO899-10|Lasioglossum ellisiae|COI-5P|HM405336-SUPPRESSED	A
ASGLF085-11|Lasioglossum ellisiae|COI-5P|MG338919	A
DLIII026-09|Lasioglossum ellisiae|COI-5P|GU666303-SUPPRESSED	A
BOWGF1475-10|Lasioglossum ellisiae|COI-5P|HM905744-SUPPRESSED	A
DIAL1089-06|Lasioglossum ellisiae|COI-5P|FJ663066	A
DLII833-07|Lasioglossum ellisiae|COI-5P|FJ663071	A
UPOLL121-09|Lasioglossum ellisiae|COI-5P	A
BEECB221-07|Lasioglossum ellisiae|COI-5P|FJ663068	A
BEECB213-07|Lasioglossum ellisiae|COI-5P|FJ663069	A
BBHYA1537-12|Lasioglossum ellisiae|COI-5P	A
DIAL888-06|Lasioglossum ellisiae|COI-5P|FJ663065	A
DIAL476-06|Lasioglossum ellisiae|COI-5P|FJ663064	A
DIAL918-06|Lasioglossum ellisiae|COI-5P|FJ663067	A
UPOLB287-09|Lasioglossum ellisiae|COI-5P	A
HYMBB485-09|Lasioglossum ellisiae|COI-5P	A
DLII031-06|Lasioglossum ellisiae|COI-5P|FJ663070	A
DLII1527-09|Lasioglossum ellisiae|COI-5P	A
DLII1559-09|Lasioglossum ellisiae|COI-5P	A
SMTPD4787-13|Lasioglossum ellisiae|COI-5P|KR890115	A
NGNAI2284-13|Lasioglossum ellisiae|COI-5P|KR891368	A
DLII1590-09|Lasioglossum ellisiae|COI-5P	A
DLII1586-09|Lasioglossum ellisiae|COI-5P	A
DLII1522-09|Lasioglossum ellisiae|COI-5P	A
DLII1566-09|Lasioglossum ellisiae|COI-5P	A
DLII762-07|Lasioglossum eophilum|COI-5P	A
DLII1271-08|Lasioglossum eophilum|COI-5P	A
BBHYA3372-12|Lasioglossum eophilum|COI-5P	A
DLII1272-08|Lasioglossum eophilum|COI-5P	A
DLII1618-09|Lasioglossum ephialtum|COI-5P	A
DIAL1075-06|Lasioglossum ephialtum|COI-5P|JF903512	A
DIAL1114-07|Lasioglossum ephialtum|COI-5P	A
DIAL1119-07|Lasioglossum ephialtum|COI-5P	A
DLII830-07|Lasioglossum ephialtum|COI-5P	A
DLII1542-09|Lasioglossum ephialtum|COI-5P	A
DLII1524-09|Lasioglossum ephialtum|COI-5P	A
DIAL795-06|Lasioglossum ephialtum|COI-5P	A
DLII618-07|Lasioglossum ephialtum|COI-5P	A
DIAL1080-06|Lasioglossum ephialtum|COI-5P	A
DIAL970-06|Lasioglossum ephialtum|COI-5P	A
DIAL960-06|Lasioglossum ephialtum|COI-5P	A
DIAL968-06|Lasioglossum ephialtum|COI-5P	A
DIAL956-06|Lasioglossum ephialtum|COI-5P	A
DIAL972-06|Lasioglossum ephialtum|COI-5P	A
DIAL961-06|Lasioglossum ephialtum|COI-5P	A
DIAL958-06|Lasioglossum ephialtum|COI-5P	A
DIAL962-06|Lasioglossum ephialtum|COI-5P	A
DIAL1076-06|Lasioglossum ephialtum|COI-5P	A
DIAL976-06|Lasioglossum ephialtum|COI-5P	A
DIAL980-06|Lasioglossum ephialtum|COI-5P	A
DLII378-07|Lasioglossum ephialtum|COI-5P	A
DIAL979-06|Lasioglossum ephialtum|COI-5P	A
DIAL1372-09|Lasioglossum ephialtum|COI-5P	A
DLIII029-09|Lasioglossum ephialtum|COI-5P	A
DIAL1417-09|Lasioglossum ephialtum|COI-5P	A
DLII1654-09|Lasioglossum ephialtum|COI-5P	A
DIAL1387-09|Lasioglossum ephialtum|COI-5P	A
DLII389-07|Lasioglossum ephialtum|COI-5P	A
DLII381-07|Lasioglossum ephialtum|COI-5P	A
DLII379-07|Lasioglossum ephialtum|COI-5P	A
DLII025-06|Lasioglossum ephialtum|COI-5P	A
DLII029-06|Lasioglossum ephialtum|COI-5P	A
DLII024-06|Lasioglossum ephialtum|COI-5P	A
DLII030-06|Lasioglossum ephialtum|COI-5P	A
DLII383-07|Lasioglossum ephialtum|COI-5P	A
BOWGF1953-10|Lasioglossum ephialtum|COI-5P	A
DLII837-07|Lasioglossum ephialtum|COI-5P	A
BOWGF1675-10|Lasioglossum ephialtum|COI-5P	A
BOWGF1688-10|Lasioglossum ephialtum|COI-5P	A
DIAL1121-07|Lasioglossum ephialtum|COI-5P	A
BOWGF576-09|Lasioglossum ephialtum|COI-5P	A
DIAL1264-08|Lasioglossum ephialtum|COI-5P	A
DIAL661-06|Lasioglossum ephialtum|COI-5P	A
DIAL780-06|Lasioglossum ephialtum|COI-5P	A
DIAL667-06|Lasioglossum ephialtum|COI-5P	A
DIAL799-06|Lasioglossum ephialtum|COI-5P	A
DIAL792-06|Lasioglossum ephialtum|COI-5P	A
DIAL139-06|Lasioglossum ephialtum|COI-5P	A
DLII1426-08|Lasioglossum ephialtum|COI-5P	A
DIAL546-06|Lasioglossum ephialtum|COI-5P	A
DIAL440-06|Lasioglossum ephialtum|COI-5P	A
DIAL410-06|Lasioglossum ephialtum|COI-5P	A
DIAL656-06|Lasioglossum ephialtum|COI-5P	A
DIAL1251-08|Lasioglossum ephialtum|COI-5P	A
DLII425-07|Lasioglossum ephialtum|COI-5P	A
DIAL797-06|Lasioglossum ephialtum|COI-5P	A
DLII1576-09|Lasioglossum ephialtum|COI-5P	A
DLII469-07|Lasioglossum ephialtum|COI-5P	A
BOWGF578-09|Lasioglossum ephialtum|COI-5P	A
DLIII034-09|Lasioglossum ephialtum|COI-5P|GU666301-SUPPRESSED	A
DIAL1067-06|Lasioglossum ephialtum|COI-5P	A
DIAL1078-06|Lasioglossum ephialtum|COI-5P	A
DIAL676-06|Lasioglossum ephialtum|COI-5P	A
BBHEC864-10|Lasioglossum ephialtum|COI-5P|HM414470	A
DIAL975-06|Lasioglossum ephialtum|COI-5P	A
DIAL135-06|Lasioglossum ephialtum|COI-5P	A
DLII1554-09|Lasioglossum ephialtum|COI-5P	A
LASNA052-08|Lasioglossum ephialtum|COI-5P	A
FBAPC587-11|Sphecodes ephippius|COI-5P|KJ837072	A
GBACU2468-13|Sphecodes ephippius|COI-5P|KJ837596	A
GBACU3515-13|Sphecodes ephippius|COI-5P|KJ837429	A
GBACU3514-13|Sphecodes ephippius|COI-5P|KJ838577	A
GBCHA1046-13|Sphecodes ephippius|COI-5P|KJ836865	A
GBACU044-12|Sphecodes ephippius|COI-5P|KJ838041	A
GBACU2466-13|Sphecodes ephippius|COI-5P|KJ839466	A
GBCHA957-13|Sphecodes ephippius|COI-5P|KJ836952	A
FBACB701-11|Sphecodes ephippius|COI-5P|KJ838811	A
GBACU2467-13|Sphecodes ephippius|COI-5P|KJ837528	A
GBACU2328-13|Sphecodes ephippius|COI-5P|KJ839207	A
FBAPC097-10|Sphecodes ephippius|COI-5P|KJ838073	A
FBHAP600-09|Sphecodes ephippius|COI-5P|KJ837535	A
FBHAP603-09|Sphecodes ephippius|COI-5P|KJ837914	A
FBHAP602-09|Sphecodes ephippius|COI-5P|KJ839790	A
BEEEE206-15|Sphecodes ephippius|COI-5P	A
BEEEE076-15|Sphecodes ephippius|COI-5P|KT074079	A
BEEEE243-15|Sphecodes ephippius|COI-5P	A
IBBP230-10|Sphecodes ephippius|COI-5P|JQ909857	A
IBBP229-10|Sphecodes ephippius|COI-5P|JQ909852	A
IBBP210-10|Sphecodes ephippius|COI-5P|JQ909855	A
IBBP232-10|Sphecodes ephippius|COI-5P|JQ909859	A
IBBP227-10|Sphecodes ephippius|COI-5P|JQ909856	A
IBBP209-10|Sphecodes ephippius|COI-5P|JQ909854	A
IBBP208-10|Sphecodes ephippius|COI-5P|JQ909853	A
IBBP231-10|Sphecodes ephippius|COI-5P|JQ909858	A
GMGMH453-14|Sphecodes ephippius|COI-5P	A
GMGMB618-14|Sphecodes ephippius|COI-5P	A
GMGMA728-14|Sphecodes ephippius|COI-5P	A
ABEE213-17|Sphecodes ephippius|COI-5P	A
GBMIN11830-13|Sphecodes ephippius|COI-5P|JX256677	A
GBMIN11833-13|Sphecodes ephippius|COI-5P|JX256669	A
GBMIN11793-13|Sphecodes ephippius|COI-5P|JX256670	A
GBMIN11791-13|Sphecodes ephippius|COI-5P|JX256674	A
GBMIN11794-13|Sphecodes ephippius|COI-5P|JX256668	A
GBMIN11832-13|Sphecodes ephippius|COI-5P|JX256673	A
GBMIN11831-13|Sphecodes ephippius|COI-5P|JX256675	A
GBMIN11792-13|Sphecodes ephippius|COI-5P|JX256672	A
GBMIN11790-13|Sphecodes ephippius|COI-5P|JX256676	A
BEEEE338-16|Sphecodes ephippius|COI-5P	A
BOFTW029-08|Augochlorella ephyra|COI-5P	A
MSAPB669-11|Lasioglossum epiense|COI-5P	A
MSAPB651-11|Lasioglossum epiense|COI-5P	A
MSAPB668-11|Lasioglossum epiense|COI-5P	A
MSAPB586-11|Lasioglossum epiense|COI-5P	A
MSAPB557-11|Lasioglossum epiense|COI-5P	A
MSAPB732-11|Lasioglossum epiense|COI-5P	A
MSAPB728-11|Lasioglossum epiense|COI-5P	A
MSAPB679-11|Lasioglossum epiense|COI-5P	A
MSAPB737-11|Lasioglossum epiense|COI-5P	A
MSAPB733-11|Lasioglossum epiense|COI-5P	A
MSAPB697-11|Lasioglossum epiense|COI-5P	A
MSAPB738-11|Lasioglossum epiense|COI-5P	A
MSAPB698-11|Lasioglossum epiense|COI-5P	A
MSAPB771-11|Lasioglossum epiense|COI-5P	A
MSAPB769-11|Lasioglossum epiense|COI-5P	A
MSAPB770-11|Lasioglossum epiense|COI-5P	A
MSAPB699-11|Lasioglossum epiense|COI-5P	A
MSAPB678-11|Lasioglossum epiense|COI-5P	A
MSAPB696-11|Lasioglossum epiense|COI-5P	A
ABBOL154-15|Lasioglossum equestre|COI-5P	A
AUSBS190-12|Lasioglossum erythrurum|COI-5P	A
AUSBS161-12|Lasioglossum erythrurum|COI-5P	A
GBAH0192-06|Lasioglossum erythrurum|COI-5P|AF103954	A
GBACU1464-12|Lasioglossum euboeense|COI-5P|KJ839158	A
GBACU1402-12|Lasioglossum euboeense|COI-5P|KJ838441	A
GBACU1465-12|Lasioglossum euboeense|COI-5P|KJ837046	A
GBACU1466-12|Lasioglossum euboeense|COI-5P|KJ836564	A
FBAPD486-11|Lasioglossum euboeense|COI-5P|KJ836954	A
FBAPD292-11|Halictus eurygnathus|COI-5P|KJ836643	A
FBAPD458-11|Halictus eurygnathus|COI-5P|KJ839238	A
FBFOR262-09|Halictus eurygnathus|COI-5P|HQ954642	A
FBFOR263-09|Halictus eurygnathus|COI-5P|HQ954643	A
GBACU3053-13|Halictus eurygnathus|COI-5P|KJ838838	A
FBAPB311-09|Halictus eurygnathus|COI-5P|KJ837237	A
GBMIN19973-13|Lasioglossum excultum|COI-5P|JQ266458	A
DLII520-07|Lasioglossum exiguum|COI-5P	A
DLII481-07|Lasioglossum exiguum|COI-5P	A
DLII508-07|Lasioglossum exiguum|COI-5P	A
DLII505-07|Lasioglossum exiguum|COI-5P	A
DLII487-07|Lasioglossum exiguum|COI-5P	A
GMHKQ211-15|Lasioglossum exiguum|COI-5P	A
MSAPB1242-12|Homalictus exleyae|COI-5P	A
MSAPB1245-12|Homalictus exleyae|COI-5P	A
MSAPB1243-12|Homalictus exleyae|COI-5P	A
MSAPB1246-12|Homalictus exleyae|COI-5P	A
MSAPB1244-12|Homalictus exleyae|COI-5P	A
BCHYM471-13|Nomioides facilis|COI-5P|KJ836534	A
BCHYM470-13|Nomioides facilis|COI-5P|KJ838426	A
BCHYM468-13|Nomioides facilis|COI-5P|KJ837956	A
BEECA194-06|Halictus farinosus|COI-5P	A
NGAAD1954-14|Halictus farinosus|COI-5P|KR898890	A
NGAAC2111-14|Halictus farinosus|COI-5P|KR876770	A
BEECB522-07|Halictus farinosus|COI-5P	A
GBAH0182-06|Halictus farinosus|COI-5P|AF102838	A
GBAH0460-06|Halictus farinosus|COI-5P|AF438420	A
GBMIN20064-13|Lasioglossum fasciatum|COI-5P|JQ266391	A
DLIII040-09|Lasioglossum fattigi|COI-5P	A
DLIII044-09|Lasioglossum fattigi|COI-5P	A
DLII1636-09|Lasioglossum fattigi|COI-5P	A
BOWGF1436-10|Lasioglossum fattigi|COI-5P	A
DIAL1091-06|Lasioglossum fattigi|COI-5P	A
DIAL1126-07|Lasioglossum fattigi|COI-5P|JF903513	A
DLII002-06|Lasioglossum fattigi|COI-5P	A
DIAL947-06|Lasioglossum fattigi|COI-5P	A
DLII1589-09|Lasioglossum fattigi|COI-5P	A
DLII1652-09|Lasioglossum fedorense|COI-5P|KF199937	A
BBHYA2079-12|Agapostemon femoratus|COI-5P	A
BEECB328-07|Agapostemon femoratus|COI-5P	A
BEECB1062-07|Agapostemon femoratus|COI-5P	A
BBHYA1164-12|Agapostemon femoratus|COI-5P	A
BBHYA1188-12|Agapostemon femoratus|COI-5P	A
BBHYA1185-12|Agapostemon femoratus|COI-5P	A
BEECC668-09|Agapostemon femoratus|COI-5P	A
BEECB327-07|Agapostemon femoratus|COI-5P	A
BEECC667-09|Agapostemon femoratus|COI-5P	A
TTHYW046-08|Agapostemon femoratus|COI-5P|KR888403	A
GBMIN20051-13|Lasioglossum ferinum|COI-5P|JQ266417	A
DLII541-07|Lasioglossum fernandezis|COI-5P|KX821061	A
DLII540-07|Lasioglossum fernandezis|COI-5P|KX821076	A
GBCHA955-13|Sphecodes ferruginatus|COI-5P|KJ838750	A
GBCHA956-13|Sphecodes ferruginatus|COI-5P|KJ839591	A
FBAPD754-11|Sphecodes ferruginatus|COI-5P|KJ838902	A
FBAPC915-11|Sphecodes ferruginatus|COI-5P|KJ837842	A
FBAPD753-11|Sphecodes ferruginatus|COI-5P|KJ838464	A
GBACU3600-13|Sphecodes ferruginatus|COI-5P|KJ836955	A
GBACU052-12|Sphecodes ferruginatus|COI-5P|KJ836806	A
GBACU3657-13|Sphecodes ferruginatus|COI-5P|KJ838805	A
GBACU3601-13|Sphecodes ferruginatus|COI-5P|KJ837174	A
FBAPC916-11|Sphecodes ferruginatus|COI-5P|KJ836761	A
FBAPC592-11|Sphecodes ferruginatus|COI-5P|KJ836405	A
GBACU049-12|Sphecodes ferruginatus|COI-5P|KJ836712	A
FBAPD750-11|Sphecodes ferruginatus|COI-5P|KJ839411	A
GBACU048-12|Sphecodes ferruginatus|COI-5P|KJ838451	A
GBACU3599-13|Sphecodes ferruginatus|COI-5P|KJ839298	A
FBAPC702-11|Sphecodes ferruginatus|COI-5P|KJ836404	A
GBACU3605-13|Sphecodes ferruginatus|COI-5P|KJ838376	A
GBACU3604-13|Sphecodes ferruginatus|COI-5P|KJ838006	A
GBACU3602-13|Sphecodes ferruginatus|COI-5P|KJ837622	A
GBACU3603-13|Sphecodes ferruginatus|COI-5P|KJ839819	A
FBAPB071-09|Sphecodes ferruginatus|COI-5P|HM401028	A
GBACU3598-13|Sphecodes ferruginatus|COI-5P|KJ836910	A
NOBEE036-09|Sphecodes ferruginatus|COI-5P	A
FBAPB072-09|Sphecodes ferruginatus|COI-5P|HM401029	A
FBHAP604-09|Sphecodes ferruginatus|COI-5P|KJ838640	A
FBHAP607-09|Sphecodes ferruginatus|COI-5P|KJ838481	A
FBHAP606-09|Sphecodes ferruginatus|COI-5P|KJ839562	A
FBHAP605-09|Sphecodes ferruginatus|COI-5P|KJ836890	A
GBMIN11829-13|Sphecodes ferruginatus|COI-5P|JX256679	A
GBMIN11789-13|Sphecodes ferruginatus|COI-5P|JX256678	A
IBBP211-10|Sphecodes ferruginatus|COI-5P|JQ909861	A
IBBP212-10|Sphecodes ferruginatus|COI-5P|JQ909862	A
IBBP233-10|Sphecodes ferruginatus|COI-5P|JQ909860	A
GBACU317-12|Sphecodes ferruginatus|COI-5P|KJ838144	A
GBAH0452-06|Lasioglossum figueresi|COI-5P|AF435357	A
MSAPB026-11|Lasioglossum fijiense|COI-5P	A
MSAPB346-11|Lasioglossum fijiense|COI-5P	A
MSAPB070-11|Lasioglossum fijiense|COI-5P	A
MSAPB227-11|Lasioglossum fijiense|COI-5P	A
[truncated: 6,370 more rows]

## Sheet: Andrenidae BOLD Position 153
BOLD Sample	COI Position 153
GBACU1331-12|Andrena aberrans|COI-5P|KJ837129	A
BEECC1033-09|Andrena accepta|COI-5P	A
BUSA081-05|Andrena accepta|COI-5P	A
ABEE197-17|Andrena aeneiventris|COI-5P	A
BEECC067-08|Pseudopanurgus aestivalis|COI-5P|FJ582455	A
BBHYJ989-10|Pseudopanurgus aestivalis|COI-5P|JF864615	A
BBHYJ990-10|Pseudopanurgus aestivalis|COI-5P|JF864616	A
BEECC066-08|Pseudopanurgus aestivalis|COI-5P|FJ582452	A
BEECC068-08|Pseudopanurgus aestivalis|COI-5P|FJ582454	A
BEECC065-08|Pseudopanurgus aestivalis|COI-5P|FJ582453	A
BOFTW021-08|Psaenythia aff-magnifica|COI-5P	A
BEECC210-08|Panurginus aff. occidentalis|COI-5P	A
GBLGC057-12|Andrena agilissima|COI-5P|KJ838061	A
GBLGC056-12|Andrena agilissima|COI-5P|KJ837337	A
GBLGC055-12|Andrena agilissima|COI-5P|KJ839659	A
GBLGC054-12|Andrena agilissima|COI-5P|KJ836776	A
BEECC311-08|Perdita albipennis|COI-5P	A
BUSA027-05|Perdita albovittata|COI-5P	A
BCHYM1467-13|Andrena alfkenella|COI-5P|KJ836809	A
GBACU2358-13|Andrena alfkenella|COI-5P|KJ838408	A
GBACU2359-13|Andrena alfkenella|COI-5P|KJ839781	A
FBAPB815-09|Andrena alfkenella|COI-5P|HM401243	A
BCHYM1466-13|Andrena alfkenella|COI-5P|KJ839237	A
GBACU2361-13|Andrena alfkenella|COI-5P|KJ838505	A
GBACU3581-13|Andrena alfkenella|COI-5P|KJ838539	A
GBACU2360-13|Andrena alfkenella|COI-5P|KJ836535	A
BEEEE109-15|Andrena alfkenella|COI-5P	A
CRHII768-16|Andrena algida|COI-5P|MG443906	A
BEECA128-06|Andrena algida|COI-5P	A
HMBCH059-07|Andrena algida|COI-5P|JX830895	A
BEECA653-06|Andrena algida|COI-5P|FJ581965	A
BEECC080-08|Andrena algida|COI-5P|FJ581966	A
BEECA654-06|Andrena algida|COI-5P|FJ581964	A
HMBCH023-07|Andrena algida|COI-5P|JX829149	A
TTHYW120-08|Andrena alleghaniensis|COI-5P|KR890234	A
HDBNS162-04|Andrena alleghaniensis|COI-5P|FJ581967	A
HDBNS161-04|Andrena alleghaniensis|COI-5P|FJ581968	A
FBAPD848-11|Andrena allosa|COI-5P|KJ837196	A
FBAPD523-11|Andrena alutacea|COI-5P|KJ839099	A
FBAPD521-11|Andrena alutacea|COI-5P|KJ836974	A
FBAPD522-11|Andrena alutacea|COI-5P|KJ839349	A
FBHAP979-09|Andrena amieti|COI-5P|GU705961	A
FBHAP096-09|Andrena amieti|COI-5P|KJ837834	A
FBHAP098-09|Andrena amieti|COI-5P|KJ837670	A
FBHAP980-09|Andrena amieti|COI-5P|GU705960	A
BUSA089-05|Perdita amoena|COI-5P	A
BEECC185-08|Andrena amphibola|COI-5P	A
GBACU3451-13|Andrena ampla|COI-5P|KJ836718	A
GBACU3450-13|Andrena ampla|COI-5P|KJ837897	A
FBHAP104-09|Andrena ampla|COI-5P|KJ837872	A
GBACU3447-13|Andrena ampla|COI-5P|KJ837317	A
FBAPD283-11|Andrena ampla|COI-5P|KJ836817	A
FBAPD261-11|Andrena ampla|COI-5P|KJ839695	A
FBAPD268-11|Andrena ampla|COI-5P|KJ838063	A
FBAPD812-11|Andrena ampla|COI-5P|KJ836960	A
GBACU3448-13|Andrena ampla|COI-5P|KJ837612	A
GBACU3449-13|Andrena ampla|COI-5P|KJ836455	A
UPOLL002-09|Calliopsis andreniformis|COI-5P	A
UPOLB822-09|Calliopsis andreniformis|COI-5P	A
HCBNS049-03|Calliopsis andreniformis|COI-5P|FJ582162	A
HCBNS048-03|Calliopsis andreniformis|COI-5P|FJ582161	A
HCBNS045-03|Calliopsis andreniformis|COI-5P|FJ582160	A
JSHYO908-11|Pseudopanurgus andrenoides|COI-5P|KR795979	A
PHMTX920-11|Pseudopanurgus andrenoides|COI-5P|KR883460	A
BEECA655-06|Pseudopanurgus andrenoides|COI-5P|FJ582456	A
BEECC064-08|Pseudopanurgus andrenoides|COI-5P|FJ582457	A
HDBNS046-03|Pseudopanurgus andrenoides|COI-5P|FJ582458	A
BEEEE001-15|Andrena angustior|COI-5P|KT074003	A
IBBP005-10|Andrena angustior|COI-5P|JQ909640	A
IBBP007-10|Andrena angustior|COI-5P|JQ909638	A
IBBP006-10|Andrena angustior|COI-5P|JQ909639	A
FBHAP864-09|Andrena angustior|COI-5P|HM376231	A
BEECA213-06|Andrena angustitarsata|COI-5P	A
BEECB571-07|Andrena angustitarsata|COI-5P	A
BUSA090-05|Calliopsis anomoptera|COI-5P	A
IBBP008-10|Andrena apicata|COI-5P|JQ909642	A
IBBP009-10|Andrena apicata|COI-5P|JQ909641	A
BEEEE345-16|Andrena apicata|COI-5P	A
GBLGC061-12|Andrena apicata|COI-5P|KJ837188	A
BOFTW020-08|Rhophitulus ARG02|COI-5P	A
BOFTW051-08|Anthrenoides ARG1|COI-5P	A
BOFTW050-08|Rhophitulus ARGspB|COI-5P	A
BEECB1015-07|Perdita ashmeadi|COI-5P	A
BEECC027-08|Andrena asteris|COI-5P|FJ581972	A
BEECC028-08|Andrena asteris|COI-5P|FJ581971	A
BEECC029-08|Andrena asteris|COI-5P|FJ581970	A
HDBNS020-03|Andrena asteris|COI-5P|FJ581973	A
HDBNS021-03|Andrena asteris|COI-5P|FJ581974	A
BEECA868-07|Callonychium atacamense|COI-5P	A
LASNA775-08|Parasarus atacamensis|COI-5P|KX820552	A
LASNA681-08|Parasarus atacamensis|COI-5P|KX820757	A
LASNA682-08|Parasarus atacamensis|COI-5P|KX820543	A
LASNA683-08|Parasarus atacamensis|COI-5P|KX820600	A
LASNA777-08|Parasarus atacamensis|COI-5P|KX820493	A
BBHYL391-10|Panurginus atriceps|COI-5P|KR795126	A
BBHYJ815-10|Panurginus atriceps|COI-5P|KR803921	A
BBHYJ816-10|Panurginus atriceps|COI-5P|KR794004	A
BUSA022-05|Pseudopanurgus atricornis|COI-5P	A
BEECB875-07|Andrena auricoma|COI-5P	A
SDBEE012-12|Andrena auricoma|COI-5P	A
BUSA055-05|Calliopsis australior|COI-5P	A
FBAPC334-10|Panurgus banksianus|COI-5P|KJ837192	A
FBAPB659-09|Panurgus banksianus|COI-5P|HQ948072	A
FBAPC629-11|Panurgus banksianus|COI-5P|KJ838905	A
FBHAP643-09|Panurgus banksianus|COI-5P|KJ837712	A
FBAPD328-11|Panurgus banksianus|COI-5P|KJ837878	A
BEEEE204-15|Panurgus banksianus|COI-5P	A
BEEEE073-15|Panurgus banksianus|COI-5P|KT074076	A
FBAPC335-10|Panurgus banksianus|COI-5P|KJ836887	A
FBAPC628-11|Panurgus banksianus|COI-5P|KJ837229	A
BEECC509-08|Andrena barbara|COI-5P	A
FBHAP126-09|Andrena barbareae|COI-5P|KJ837368	A
FBHAP479-09|Andrena barbilabris|COI-5P|KJ839405	A
FBHAP477-09|Andrena barbilabris|COI-5P|KJ837326	A
FBAPC845-11|Andrena barbilabris|COI-5P|KJ837770	A
FBAPD385-11|Andrena barbilabris|COI-5P|KJ836767	A
GBACU1188-12|Andrena barbilabris|COI-5P|KJ837320	A
GBACU1185-12|Andrena barbilabris|COI-5P|KJ836724	A
BCHYM1474-13|Andrena barbilabris|COI-5P|KJ838683	A
GBACU1187-12|Andrena barbilabris|COI-5P|KJ837541	A
BCHYM1475-13|Andrena barbilabris|COI-5P|KJ838684	A
GBACU1080-12|Andrena barbilabris|COI-5P|KJ837873	A
FBAPD536-11|Andrena barbilabris|COI-5P|KJ837100	A
FBAPD537-11|Andrena barbilabris|COI-5P|KJ836669	A
BEEEE002-15|Andrena barbilabris|COI-5P|KT074004	A
FBAPC846-11|Andrena barbilabris|COI-5P|KJ838206	A
GBMIN71501-17|Andrena barbilabris|COI-5P|KX374720	A
FBHAP478-09|Andrena barbilabris|COI-5P|KJ837059	A
SSKUB9250-15|Andrena barbilabris|COI-5P|MF932840	A
RRMFA258-15|Andrena barbilabris|COI-5P|KT604563	A
BBHYL329-10|Andrena barbilabris|COI-5P|JN293771	A
BEECA127-06|Andrena barbilabris|COI-5P	A
BEECC023-08|Andrena barbilabris|COI-5P|FJ581975	A
BEECC021-08|Andrena barbilabris|COI-5P|FJ581977	A
BEECC022-08|Andrena barbilabris|COI-5P|FJ581976	A
SMTPB10145-13|Andrena barbilabris|COI-5P|KR893416	A
BEECA657-06|Andrena barbilabris|COI-5P	A
BEECA656-06|Andrena barbilabris|COI-5P	A
SSROB1015-14|Andrena barbilabris|COI-5P|KR889651	A
SMTPB10140-13|Andrena barbilabris|COI-5P|KR885459	A
BEECC1078-09|Andrena barbilabris|COI-5P	A
BEECB768-07|Andrena bc122|COI-5P	A
BEECB796-07|Panurginus beardsleyi|COI-5P	A
BEECB795-07|Panurginus beardsleyi|COI-5P	A
BEECB536-07|Panurginus beardsleyi|COI-5P	A
HYMBC099-10|Panurginus beardsleyi|COI-5P	A
GBMIN71503-17|Andrena bicolor|COI-5P|KX957891	A
GMGMK846-14|Andrena bicolor|COI-5P	A
GMGMJ952-14|Andrena bicolor|COI-5P	A
GMGMJ953-14|Andrena bicolor|COI-5P	A
GMGMG287-14|Andrena bicolor|COI-5P	A
GMGMK421-14|Andrena bicolor|COI-5P	A
BEEEE301-16|Andrena bicolor|COI-5P	A
BEEEE276-16|Andrena bicolor|COI-5P	A
BEEEE114-15|Andrena bicolor|COI-5P	A
BEEEE003-15|Andrena bicolor|COI-5P|KT074009	A
NOBEE015-09|Andrena bicolor|COI-5P	A
FBHAP097-09|Andrena bicolor|COI-5P|KJ837697	A
FBAPC672-11|Andrena bicolor|COI-5P|KJ838348	A
NOBEE014-09|Andrena bicolor|COI-5P	A
FBHAP482-09|Andrena bicolor|COI-5P|KJ836543	A
BEEEE006-15|Andrena bicolor|COI-5P|KT074007	A
BEEEE209-15|Andrena bicolor|COI-5P	A
BEEEE005-15|Andrena bicolor|COI-5P|KT074006	A
IBBP014-10|Andrena bicolor|COI-5P|JQ909648	A
IBBP015-10|Andrena bicolor|COI-5P|JQ909643	A
IBBP010-10|Andrena bicolor|COI-5P|JQ909645	A
IBBP012-10|Andrena bicolor|COI-5P|JQ909646	A
IBBP013-10|Andrena bicolor|COI-5P|JQ909647	A
IBBP011-10|Andrena bicolor|COI-5P|JQ909644	A
BEEEE110-15|Andrena bicolor|COI-5P	A
BEEEE004-15|Andrena bicolor|COI-5P|KT074005	A
FBHAP102-09|Andrena bicolor|COI-5P|KJ839635	A
GMGML356-14|Andrena bicolor|COI-5P	A
FBHAP483-09|Andrena bicolor|COI-5P|GU706056	A
BEEEE007-15|Andrena bicolor|COI-5P|KT074008	A
BEEEE166-15|Andrena bicolor|COI-5P	A
GBMIN71502-17|Andrena bicolor|COI-5P|KX374713	A
ABEE202-17|Andrena bicolor|COI-5P	A
BUSA041-05|Perdita biguttata|COI-5P	A
FBAPD027-11|Andrena bimaculata|COI-5P|KJ836600	A
FBAPC833-11|Andrena bimaculata|COI-5P|KJ836845	A
GBLGC075-12|Andrena bimaculata|COI-5P|KJ838418	A
GBLGC074-12|Andrena bimaculata|COI-5P|KJ839689	A
GBLGC073-12|Andrena bimaculata|COI-5P|KJ838882	A
FBAPC831-11|Andrena bimaculata|COI-5P|KJ838732	A
BEEEE143-15|Andrena bimaculata|COI-5P	A
BEECB550-07|Andrena birtwelli|COI-5P	A
FBAPD528-11|Andrena bluethgeni|COI-5P|KJ837393	A
GBACU790-12|Andrena bucephala|COI-5P|KJ837003	A
GBACU789-12|Andrena bucephala|COI-5P|KJ839574	A
FBHAP886-09|Andrena bucephala|COI-5P|HM376232	A
BEEEE008-15|Andrena bucephala|COI-5P|KT074010	A
BEECC514-08|Panurginus CA01|COI-5P	A
BEECC513-08|Panurginus CA01|COI-5P	A
BEECC515-08|Panurginus CA01|COI-5P	A
INRMA3155-15|Andrena caerulea|COI-5P	A
INRMA3151-15|Andrena caerulea|COI-5P	A
INRMA3153-15|Andrena caerulea|COI-5P	A
INRMA3152-15|Andrena caerulea|COI-5P	A
INRMA3154-15|Andrena caerulea|COI-5P	A
FBACB712-11|Panurgus calcaratus|COI-5P|KJ839230	A
FBACB711-11|Panurgus calcaratus|COI-5P|KJ837913	A
GBACU1182-12|Panurgus calcaratus|COI-5P|KJ837348	A
GBACU2295-13|Panurgus calcaratus|COI-5P|KJ838310	A
FBAPD897-11|Panurgus calcaratus|COI-5P|KJ838303	A
FBAPD898-11|Panurgus calcaratus|COI-5P|KJ836919	A
FBHAP647-09|Panurgus calcaratus|COI-5P|GU705957	A
GBACU3282-13|Panurgus calcaratus|COI-5P|KJ837516	A
GBACU3281-13|Panurgus calcaratus|COI-5P|KJ837687	A
FBAPD899-11|Panurgus calcaratus|COI-5P|KJ836633	A
FBAPD896-11|Panurgus calcaratus|COI-5P|KJ836563	A
FBHAP648-09|Panurgus calcaratus|COI-5P|GU705956	A
ABEE234-17|Panurgus calcaratus|COI-5P	A
GBACU2296-13|Panurgus calcaratus|COI-5P|KJ838741	A
GBACU3283-13|Panurgus calcaratus|COI-5P|KJ839043	A
FBHAP646-09|Panurgus calcaratus|COI-5P|KJ838465	A
FBAPC627-11|Panurgus calcaratus|COI-5P|KJ838222	A
BEEEE074-15|Panurgus calcaratus|COI-5P|KT074077	A
ABEE124-17|Panurgus calcaratus|COI-5P	A
ABEE128-17|Panurgus calcaratus|COI-5P	A
GBACU3285-13|Panurgus calcaratus|COI-5P|KJ837942	A
GBACU3286-13|Panurgus calcaratus|COI-5P|KJ836687	A
GBACU3284-13|Panurgus calcaratus|COI-5P|KJ838112	A
BBHYA1498-12|Perdita callicerata|COI-5P	A
BBHYA1502-12|Perdita callicerata|COI-5P	A
BBHYA1499-12|Perdita callicerata|COI-5P	A
BBHYA1522-12|Perdita callicerata|COI-5P	A
BBHYA1500-12|Perdita callicerata|COI-5P	A
BUSA030-05|Perdita callicerata|COI-5P	A
BEECC309-08|Calliopsis callops|COI-5P	A
BEECC310-08|Calliopsis callops|COI-5P	A
BEECC063-08|Andrena canadensis|COI-5P|FJ581978	A
BEECC062-08|Andrena canadensis|COI-5P|FJ581979	A
HCBNS017-03|Andrena canadensis|COI-5P|FJ581981	A
HCBNS018-03|Andrena canadensis|COI-5P|FJ581982	A
HDBNS022-03|Andrena canadensis|COI-5P|FJ581980	A
BEECA211-06|Andrena candida|COI-5P	A
BEECC890-09|Andrena candida|COI-5P	A
BEECC889-09|Andrena candida|COI-5P	A
BEECB853-07|Andrena candida|COI-5P	A
BEECB604-07|Andrena candida|COI-5P	A
IBBP240-10|Andrena carantonica|COI-5P|JQ909655	A
IBBP237-10|Andrena carantonica|COI-5P|JQ909649	A
IBBP239-10|Andrena carantonica|COI-5P|JQ909650	A
IBBP238-10|Andrena carantonica|COI-5P|JQ909651	A
IBBP241-10|Andrena carantonica|COI-5P|JQ909654	A
FBAPD854-11|Andrena carantonica|COI-5P|KJ837438	A
GBCHA631-13|Andrena carantonica|COI-5P|KJ837668	A
FBAPD853-11|Andrena carantonica|COI-5P|KJ838253	A
FBAPD855-11|Andrena carantonica|COI-5P|KJ836624	A
FBAPD813-11|Andrena carantonica|COI-5P|KJ838931	A
FBAPD173-11|Andrena carantonica|COI-5P|KJ838149	A
FBHAP484-09|Andrena carantonica|COI-5P|GU706054	A
FBHAP487-09|Andrena carantonica|COI-5P|KJ837626	A
NOBEE029-09|Andrena carantonica|COI-5P	A
IBBP242-10|Andrena carantonica|COI-5P|JQ909653	A
IBBP243-10|Andrena carantonica|COI-5P|JQ909652	A
GBLGC044-12|Andrena carantonica|COI-5P|KJ837992	A
ASGCB234-13|Andrena cardina|COI-5P	A
BOFTW052-08|Parapsaenythia carinulata|COI-5P	A
BEECC074-08|Andrena carlini|COI-5P|FJ581984	A
BEECC075-08|Andrena carlini|COI-5P|FJ581983	A
BEECC072-08|Andrena carlini|COI-5P|FJ581986	A
BEECC073-08|Andrena carlini|COI-5P|FJ581985	A
HCBNS230-03|Andrena carlini|COI-5P|FJ581988	A
HCBNS208-03|Andrena carlini|COI-5P|FJ581987	A
BEECC035-08|Andrena carolina|COI-5P|FJ581990	A
BEECC059-08|Andrena carolina|COI-5P|FJ581989	A
BEECC025-08|Andrena carolina|COI-5P|FJ581993	A
BEECB149-07|Andrena carolina|COI-5P	A
BEECB148-07|Andrena carolina|COI-5P	A
BEECC026-08|Andrena carolina|COI-5P|FJ581991	A
BEECC024-08|Andrena carolina|COI-5P|FJ581992	A
BEECC082-08|Andrena ceanothi|COI-5P|FJ581994	A
HDBNS225-04|Andrena ceanothi|COI-5P|FJ581995	A
SDBEE015-12|Andrena cerasifolii|COI-5P	A
SDBEE014-12|Andrena cerasifolii|COI-5P	A
SDBEE001-12|Ancylandrena cf. atoposoma|COI-5P	A
DIAL147-06|Andrena cf. venata|COI-5P	A
SDBEE013-12|Andrena cf. auricoma|COI-5P	A
ARTNO160-17|Andrena cf. nanula|COI-5P	A
SDBEE016-12|Andrena cf. impolita|COI-5P	A
BEECC1126-09|Andrena chapmanae|COI-5P	A
BEECC1125-09|Andrena chapmanae|COI-5P	A
BUSA025-05|Perdita chihuahua|COI-5P	A
LASNA680-08|Parasarus CHL02|COI-5P|KX820957	A
LASNA774-08|Parasarus CHL02|COI-5P|KX820767	A
BEECA873-07|Anthrenoides CHL05|COI-5P|KX821089	A
FBHAP890-09|Andrena chrysopus|COI-5P|GU705927	A
FBHAP889-09|Andrena chrysopus|COI-5P|KJ837564	A
FBHAP891-09|Andrena chrysopus|COI-5P|GU705925	A
FBHAP892-09|Andrena chrysopyga|COI-5P|HM376233	A
FBHAP490-09|Andrena chrysosceles|COI-5P|HQ954749	A
BEEEE126-15|Andrena chrysosceles|COI-5P	A
FBAPC308-10|Andrena chrysosceles|COI-5P|JN262171	A
GBMIN71504-17|Andrena chrysosceles|COI-5P|KX374715	A
BEECC290-08|Calliopsis cincta|COI-5P	A
GBMIN71508-17|Andrena cineraria|COI-5P|KX374726	A
GBMIN71511-17|Andrena cineraria|COI-5P|KX374730	A
GBMIN71512-17|Andrena cineraria|COI-5P|KX374721	A
GBMIN71507-17|Andrena cineraria|COI-5P|KX374728	A
GBMIN71506-17|Andrena cineraria|COI-5P|KX374724	A
GBMIN71510-17|Andrena cineraria|COI-5P|KX374723	A
IBBP016-10|Andrena cineraria|COI-5P|JQ909656	A
FBHAP123-09|Andrena cineraria|COI-5P|KJ836514	A
FBHAP122-09|Andrena cineraria|COI-5P|KJ837614	A
FBHAP124-09|Andrena cineraria|COI-5P|KJ839533	A
GBMIN71509-17|Andrena cineraria|COI-5P|KX374722	A
BEEEE182-15|Andrena cineraria|COI-5P	A
BEEEE292-16|Andrena cineraria|COI-5P	A
BEEEE269-16|Andrena cineraria|COI-5P	A
BEEEE129-15|Andrena cineraria|COI-5P	A
FBHAP168-09|Andrena cineraria|COI-5P|KJ836510	A
GBMIN71505-17|Andrena cineraria|COI-5P|KX957811	A
BUSA035-05|Perdita cladothricis|COI-5P	A
OPPBA812-17|Andrena clarkella|COI-5P	A
FBHAP895-09|Andrena clarkella|COI-5P|GU705928	A
NOBEE017-09|Andrena clarkella|COI-5P	A
FBHAP894-09|Andrena clarkella|COI-5P|GU705930	A
KNWRA088-12|Andrena clarkella|COI-5P|KU496683	A
FBHAP492-09|Andrena clarkella|COI-5P|HQ954750	A
BEEEE115-15|Andrena clarkella|COI-5P	A
FBHAP493-09|Andrena clarkella|COI-5P|KJ838921	A
IBBP017-10|Andrena clarkella|COI-5P|JQ909657	A
GBACU1494-12|Melitturga clavicornis|COI-5P|KJ836607	A
FBAPC927-11|Melitturga clavicornis|COI-5P|KJ839822	A
GBACU3241-13|Melitturga clavicornis|COI-5P|KJ836993	A
GBACU3240-13|Melitturga clavicornis|COI-5P|KJ838431	A
SSWLB388-13|Andrena cleodora|COI-5P|KR883993	A
IBBP018-10|Andrena coitana|COI-5P|JQ909658	A
IBBP025-10|Andrena coitana|COI-5P|JQ909663	A
IBBP020-10|Andrena coitana|COI-5P|JQ909665	A
IBBP024-10|Andrena coitana|COI-5P|JQ909662	A
IBBP019-10|Andrena coitana|COI-5P|JQ909664	A
IBBP021-10|Andrena coitana|COI-5P|JQ909659	A
IBBP022-10|Andrena coitana|COI-5P|JQ909660	A
IBBP023-10|Andrena coitana|COI-5P|JQ909661	A
FBAPD075-11|Andrena coitana|COI-5P|KJ836599	A
BEEEE302-16|Andrena coitana|COI-5P	A
BEECC1048-09|Andrena colletina|COI-5P	A
BEECC1049-09|Andrena colletina|COI-5P	A
BEECC1051-09|Andrena colletina|COI-5P	A
BEECB674-07|Calliopsis coloradensis|COI-5P	A
BEECC362-08|Calliopsis coloratipes|COI-5P	A
BEECC361-08|Calliopsis coloratipes|COI-5P	A
BEECC364-08|Calliopsis coloratipes|COI-5P	A
BEECC363-08|Calliopsis coloratipes|COI-5P	A
NGNAX2043-14|Andrena columbiana|COI-5P|KR896541	A
FBHAP900-09|Andrena combinata|COI-5P|HM376234	A
GBACU2399-13|Andrena combinata|COI-5P|KJ839478	A
GBACU2400-13|Andrena combinata|COI-5P|KJ838318	A
GBACU1066-12|Andrena combinata|COI-5P|KJ837482	A
GBACU2398-13|Andrena combinata|COI-5P|KJ838976	A
GBACU1065-12|Andrena combinata|COI-5P|KJ838193	A
GBACU1064-12|Andrena combinata|COI-5P|KJ838892	A
ASGCB199-13|Andrena commoda|COI-5P	A
CRHIJ878-16|Andrena commoda|COI-5P|MG443737	A
CRHIF398-16|Andrena commoda|COI-5P|MG442364	A
CRHIF403-16|Andrena commoda|COI-5P|MG443153	A
CRHII767-16|Andrena commoda|COI-5P|MG443135	A
ASGCB197-13|Andrena commoda|COI-5P	A
UPOLB747-09|Andrena commoda|COI-5P	A
UPOLB522-09|Andrena commoda|COI-5P	A
ASGCB198-13|Andrena commoda|COI-5P	A
UPOLB559-09|Andrena commoda|COI-5P	A
UPOLB749-09|Andrena commoda|COI-5P	A
CRHIF397-16|Andrena commoda|COI-5P|MG447052	A
CRHIJ877-16|Andrena commoda|COI-5P|MG447399	A
CRHIF406-16|Andrena commoda|COI-5P|MG447239	A
CRHIF404-16|Andrena commoda|COI-5P|MG442851	A
CRHIF399-16|Andrena commoda|COI-5P|MG442477	A
CRHII766-16|Andrena commoda|COI-5P|MG447907	A
CRHIJ876-16|Andrena commoda|COI-5P|MG440154	A
CRHIF401-16|Andrena commoda|COI-5P|MG439825	A
CRHIF402-16|Andrena commoda|COI-5P|MG442927	A
CRHIJ875-16|Andrena commoda|COI-5P|MG447199	A
CRHIH486-16|Andrena commoda|COI-5P|MG446558	A
BEEMH061-06|Andrena commoda|COI-5P|MG444664	A
FBAPB977-09|Andrena confinis|COI-5P|HM401263	A
FBAPD028-11|Andrena confinis|COI-5P|KJ838252	A
FBAPD029-11|Andrena confinis|COI-5P|KJ839215	A
FBAPD012-11|Andrena confinis|COI-5P|KJ837364	A
FBAPD014-11|Andrena confinis|COI-5P|KJ838789	A
FBHAP906-09|Andrena congruens|COI-5P|GU705940	A
GBACU3458-13|Andrena congruens|COI-5P|KJ837968	A
FBHAP908-09|Andrena congruens|COI-5P|GU705944	A
FBHAP907-09|Andrena congruens|COI-5P|GU705946	A
BEECC519-08|Perdita consobrina|COI-5P	A
BEECC520-08|Perdita consobrina|COI-5P	A
BEECA386-06|Andrena cornelli|COI-5P	A
BBHYL325-10|Andrena costillensis|COI-5P|JN293769	A
BBHYL342-10|Andrena costillensis|COI-5P|JN293782	A
BEECB887-07|Andrena costillensis|COI-5P	A
BEECB888-07|Andrena costillensis|COI-5P	A
BEECC1055-09|Andrena costillensis|COI-5P	A
NGNAI474-13|Andrena costillensis|COI-5P|KR900861	A
BEECC1052-09|Andrena costillensis|COI-5P	A
CNRON108-13|Andrena crataegi|COI-5P|KR411431	A
HDBNS039-03|Andrena crataegi|COI-5P|FJ581998	A
HDBNS040-03|Andrena crataegi|COI-5P|FJ581999	A
BEECC094-08|Andrena crataegi|COI-5P|FJ581996	A
BEECC093-08|Andrena crataegi|COI-5P|FJ581997	A
DIAL184-06|Andrena cressonii|COI-5P	A
ERPIR274-12|Andrena cressonii|COI-5P|KR782640	A
UPOLB491-09|Andrena cressonii|COI-5P	A
UPOLB558-09|Andrena cressonii|COI-5P	A
UPOLB547-09|Andrena cressonii|COI-5P	A
SMTPB11223-13|Andrena cressonii|COI-5P|KR888070	A
SSROA842-14|Andrena cressonii|COI-5P|KR886995	A
BEECA532-06|Andrena cressonii|COI-5P	A
BEECA533-06|Andrena cressonii|COI-5P	A
LASNA336-08|Andrena cubiceps|COI-5P	A
LASNA430-08|Andrena cubiceps|COI-5P	A
BEECA207-06|Andrena cupreotincta|COI-5P	A
BEECA208-06|Andrena cupreotincta|COI-5P	A
ABEE201-17|Andrena danuvia|COI-5P	A
ABBOL074-15|Andrena dentata|COI-5P	A
IBBP026-10|Andrena denticulata|COI-5P|JQ909668	A
IBBP027-10|Andrena denticulata|COI-5P|JQ909667	A
FBHAP920-09|Andrena denticulata|COI-5P|GU705954	A
FBHAP919-09|Andrena denticulata|COI-5P|HQ954764	A
BEEEE257-15|Andrena denticulata|COI-5P	A
GBACU2350-13|Andrena denticulata|COI-5P|KJ839112	A
FBHAP918-09|Andrena denticulata|COI-5P|GU705951	A
GBACU2349-13|Andrena denticulata|COI-5P|KJ837924	A
GBACU2850-13|Andrena denticulata|COI-5P|KJ837616	A
FBHAP917-09|Andrena denticulata|COI-5P|GU705953	A
GBACU315-12|Andrena denticulata|COI-5P|KJ837488	A
IBBP028-10|Andrena denticulata|COI-5P|JQ909666	A
GBACU316-12|Andrena denticulata|COI-5P|KJ836437	A
FBAPD894-11|Panurgus dentipes|COI-5P|KJ838782	A
GBACU1318-12|Panurgus dentipes|COI-5P|KJ839720	A
FBAPD895-11|Panurgus dentipes|COI-5P|KJ839178	A
GBACU1321-12|Panurgus dentipes|COI-5P|KJ837636	A
GBACU1322-12|Panurgus dentipes|COI-5P|KJ838203	A
FBAPD892-11|Panurgus dentipes|COI-5P|KJ838866	A
GBACU1320-12|Panurgus dentipes|COI-5P|KJ836713	A
GBACU1319-12|Panurgus dentipes|COI-5P|KJ839166	A
FBAPD893-11|Panurgus dentipes|COI-5P|KJ839136	A
GMGMC690-14|Panurgus dentipes|COI-5P	A
FBAPC623-11|Panurgus dentipes|COI-5P|KJ837155	A
FBAPC626-11|Panurgus dentipes|COI-5P|KJ839538	A
FBAPC624-11|Panurgus dentipes|COI-5P|KJ837360	A
FBAPC625-11|Panurgus dentipes|COI-5P|KJ838097	A
BEECA008-06|Andrena distans|COI-5P	A
BEECA009-06|Andrena distans|COI-5P	A
FBAPD026-11|Andrena distinguenda|COI-5P|KJ839472	A
ABEE132-17|Andrena dorsalis|COI-5P	A
ABEE001-17|Andrena dorsalis|COI-5P	A
FBHAP112-09|Andrena dorsata|COI-5P|KJ838925	A
FBHAP114-09|Andrena dorsata|COI-5P|KJ839076	A
FBHAP115-09|Andrena dorsata|COI-5P|KJ837346	A
FBHAP113-09|Andrena dorsata|COI-5P|KJ837014	A
FBAPB163-09|Andrena dorsata|COI-5P|HM401057	A
GBACU1572-12|Andrena dorsata|COI-5P|KJ838774	A
FBHAP962-09|Andrena dorsata|COI-5P|GU705959	A
FBAPB162-09|Andrena dorsata|COI-5P|HM401056	A
FBAPD900-11|Andrena dorsata|COI-5P|KJ837991	A
FBAPD902-11|Andrena dorsata|COI-5P|KJ839102	A
GBACU3442-13|Andrena dorsata|COI-5P|KJ839807	A
GBACU1568-12|Andrena dorsata|COI-5P|KJ837258	A
FBAPC305-10|Andrena dorsata|COI-5P|KJ839074	A
FBAPD901-11|Andrena dorsata|COI-5P|KJ838612	A
FBAPD921-11|Andrena dorsata|COI-5P|KJ837590	A
FBAPD168-11|Andrena dorsata|COI-5P|KJ837949	A
GBACU1571-12|Andrena dorsata|COI-5P|KJ837517	A
FBAPC306-10|Andrena dorsata|COI-5P|KJ837751	A
GBMIN71514-17|Andrena dorsata|COI-5P|KX374696	A
GBMIN71515-17|Andrena dorsata|COI-5P|KX374697	A
BEEEE009-15|Andrena dorsata|COI-5P|KT074011	A
BEEEE010-15|Andrena dorsata|COI-5P|KT074012	A
ASGCB200-13|Andrena dunningi|COI-5P	A
SMTPB13117-13|Andrena dunningi|COI-5P|KR881003	A
SMTPF3045-14|Andrena dunningi|COI-5P|KR889482	A
HCBNS028-03|Andrena dunningi|COI-5P|FJ582004	A
HCBNS030-03|Andrena dunningi|COI-5P|FJ582006	A
HCBNS029-03|Andrena dunningi|COI-5P|FJ582005	A
HCBNS026-03|Andrena dunningi|COI-5P|FJ582002	A
HCBNS027-03|Andrena dunningi|COI-5P|FJ582003	A
HCBNS025-03|Andrena dunningi|COI-5P|FJ582001	A
HCBNS032-03|Andrena dunningi|COI-5P|FJ582007	A
ERPIR265-12|Andrena dunningi|COI-5P|KR795756	A
UPOLB534-09|Andrena dunningi|COI-5P	A
BEECC079-08|Andrena dunningi|COI-5P|FJ582000	A
HCBNS033-03|Andrena dunningi|COI-5P|FJ582008	A
SMTPB10138-13|Andrena dunningi|COI-5P|KR897804	A
BEEMH223-06|Andrena dunningi|COI-5P|MG439550	A
SMTPL4553-15|Andrena dunningi|COI-5P|MG440693	A
SMTPM3555-15|Andrena dunningi|COI-5P|MG446713	A
SMTPB10161-13|Andrena dunningi|COI-5P|KR898644	A
SMTPB18115-13|Andrena dunningi|COI-5P|KR880204	A
SMTPB17458-13|Andrena dunningi|COI-5P|KR874109	A
SMTPL1713-15|Andrena dunningi|COI-5P|MG442076	A
CNROK1308-13|Andrena dunningi|COI-5P|KR406938	A
TTHYW745-08|Andrena dunningi|COI-5P|KR894627	A
TTHYW761-08|Andrena dunningi|COI-5P|KR888515	A
TTHYW763-08|Andrena dunningi|COI-5P|KR880562	A
BUSA031-05|Macrotera echinocacti|COI-5P	A
ABBOL073-15|Andrena edashigei|COI-5P	A
BEECC1138-09|Calliopsis edwardsii|COI-5P	A
BUSA009-05|Megandrena enceliae|COI-5P	A
BEECB205-07|Megandrena enceliae|COI-5P	A
GBACU1347-12|Andrena enslinella|COI-5P|KJ838020	A
FBAPD063-11|Andrena enslinella|COI-5P|KJ838180	A
CNTIB194-15|Andrena erigeniae|COI-5P|MF935735	A
HDBNS158-04|Andrena erigeniae|COI-5P|FJ582010	A
HDBNS159-04|Andrena erigeniae|COI-5P|FJ582009	A
SSWLA026-13|Andrena euandrena4|COI-5P|KR882766	A
BEECC357-08|Calliopsis euphorbiae|COI-5P	A
BEECB406-07|Andrena evoluta|COI-5P	A
BEECB405-07|Andrena evoluta|COI-5P	A
BEECC1068-09|Andrena evoluta|COI-5P	A
FBAPD037-11|Andrena falsifica|COI-5P|KJ838296	A
FBAPD038-11|Andrena falsifica|COI-5P|KJ838564	A
GBACU1855-12|Andrena falsifica|COI-5P|KJ839739	A
FBAPC696-11|Andrena falsifica|COI-5P|KJ838103	A
FBAPC695-11|Andrena falsifica|COI-5P|KJ837084	A
GBACU1851-12|Andrena falsifica|COI-5P|KJ839398	A
GBACU1852-12|Andrena falsifica|COI-5P|KJ838198	A
GBACU1854-12|Andrena falsifica|COI-5P|KJ836846	A
GBACU1853-12|Andrena falsifica|COI-5P|KJ839359	A
FBHAP496-09|Andrena falsifica|COI-5P|KJ836986	A
FBHAP497-09|Andrena falsifica|COI-5P|KJ838527	A
LASNA692-08|Notoxaea ferruginea|COI-5P	A
LASNA786-08|Notoxaea ferruginea|COI-5P	A
BOFTW135-08|Notoxaea ferruginea|COI-5P	A
BEEEE128-15|Andrena flavipes|COI-5P	A
BEEEE303-16|Andrena flavipes|COI-5P	A
ABEE134-17|Andrena flavipes|COI-5P	A
ABEE133-17|Andrena flavipes|COI-5P	A
ABEE135-17|Andrena flavipes|COI-5P	A
FBAPC824-11|Andrena florea|COI-5P|KJ836420	A
FBAPC823-11|Andrena florea|COI-5P|KJ838787	A
FBAPD049-11|Andrena florea|COI-5P|KJ839804	A
FBAPD051-11|Andrena florea|COI-5P|KJ837623	A
FBHAP935-09|Andrena florea|COI-5P|HM376235	A
FBAPC825-11|Andrena florea|COI-5P|KJ836537	A
FBAPC822-11|Andrena florea|COI-5P|KJ837532	A
BEEEE194-15|Andrena florea|COI-5P	A
BEEEE174-15|Andrena florea|COI-5P	A
GMGMK159-14|Andrena florea|COI-5P	A
GMGML157-14|Andrena florea|COI-5P	A
GMGMK164-14|Andrena florea|COI-5P	A
FBAPD050-11|Andrena florea|COI-5P|KJ837190	A
ABEE137-17|Andrena florea|COI-5P	A
ABEE136-17|Andrena florea|COI-5P	A
BCHYM419-13|Andrena floricola|COI-5P|KJ837454	A
FBAPD875-11|Andrena floricola|COI-5P|KJ837140	A
FBAPC688-11|Andrena floricola|COI-5P|KJ839792	A
FBAPD064-11|Andrena floricola|COI-5P|KJ838305	A
FBAPC685-11|Andrena floricola|COI-5P|KJ838729	A
FBAPD066-11|Andrena floricola|COI-5P|KJ837514	A
FBAPD065-11|Andrena floricola|COI-5P|KJ838897	A
BEECC313-08|Perdita florissantella|COI-5P	A
FBHAP888-09|Andrena florivaga|COI-5P|GU705923	A
FBHAP940-09|Andrena florivaga|COI-5P|GU705955	A
BCHYM1462-13|Andrena florivaga|COI-5P|KJ837219	A
FBAPD078-11|Andrena florivaga|COI-5P|KJ839417	A
BEECC085-08|Andrena forbesii|COI-5P|FJ582011	A
BEECC084-08|Andrena forbesii|COI-5P|FJ582012	A
ERPIR271-12|Andrena forbesii|COI-5P|KR804424	A
BEECC083-08|Andrena forbesii|COI-5P|FJ582013	A
HDBNS224-04|Andrena forbesii|COI-5P|FJ582014	A
HDBNS223-04|Andrena forbesii|COI-5P|FJ582015	A
BUSA082-05|Pseudopanurgus fraterculus|COI-5P	A
HMBCH058-07|Andrena frigida|COI-5P|JX833011	A
SMTPL7027-15|Andrena frigida|COI-5P|MG446264	A
BEECA652-06|Andrena frigida|COI-5P|FJ582016	A
BEECA651-06|Andrena frigida|COI-5P|FJ582017	A
SMTPB10134-13|Andrena frigida|COI-5P|MG448325	A
SMTPB14728-13|Andrena frigida|COI-5P|KR887832	A
[truncated: 1,265 more rows]

## Sheet: Melittidae BOLD Position 153
BOLD Sample	COI Position 153
[truncated: 146 more rows]
